# Supplementary material for: Tuning the Anthranilamide Peptidomimetic Design to Selectively Target Planktonic Bacteria and Biofilm
Source: MDPI journal article supplement (doi:10.3390/antibiotics12030585), 2023-03-15

## The Supplementary Data for

### **Tuning the anthranilamide peptidomimetic design to selectively target planktonic bacteria and biofilm**

Rajesh Kuppasamy, Muhammad Yasir, Tsz Tin Yu, Florida Voli, Orazio Vittorio, Michael J. Miller, Peter Lewis, David StC Black, Mark Willcox and Naresh Kumar

The analytical data for compounds upto 6a and the intermediate 10a and the final compound 12a were published already [20]

<sup>1</sup>H NMR of *tert*-butyl (S)-(2-(2-(2-amino-5-bromobenzamido)-3-(1*H*-indol-3-yl)propanamido)ethyl)carbamate (6a)

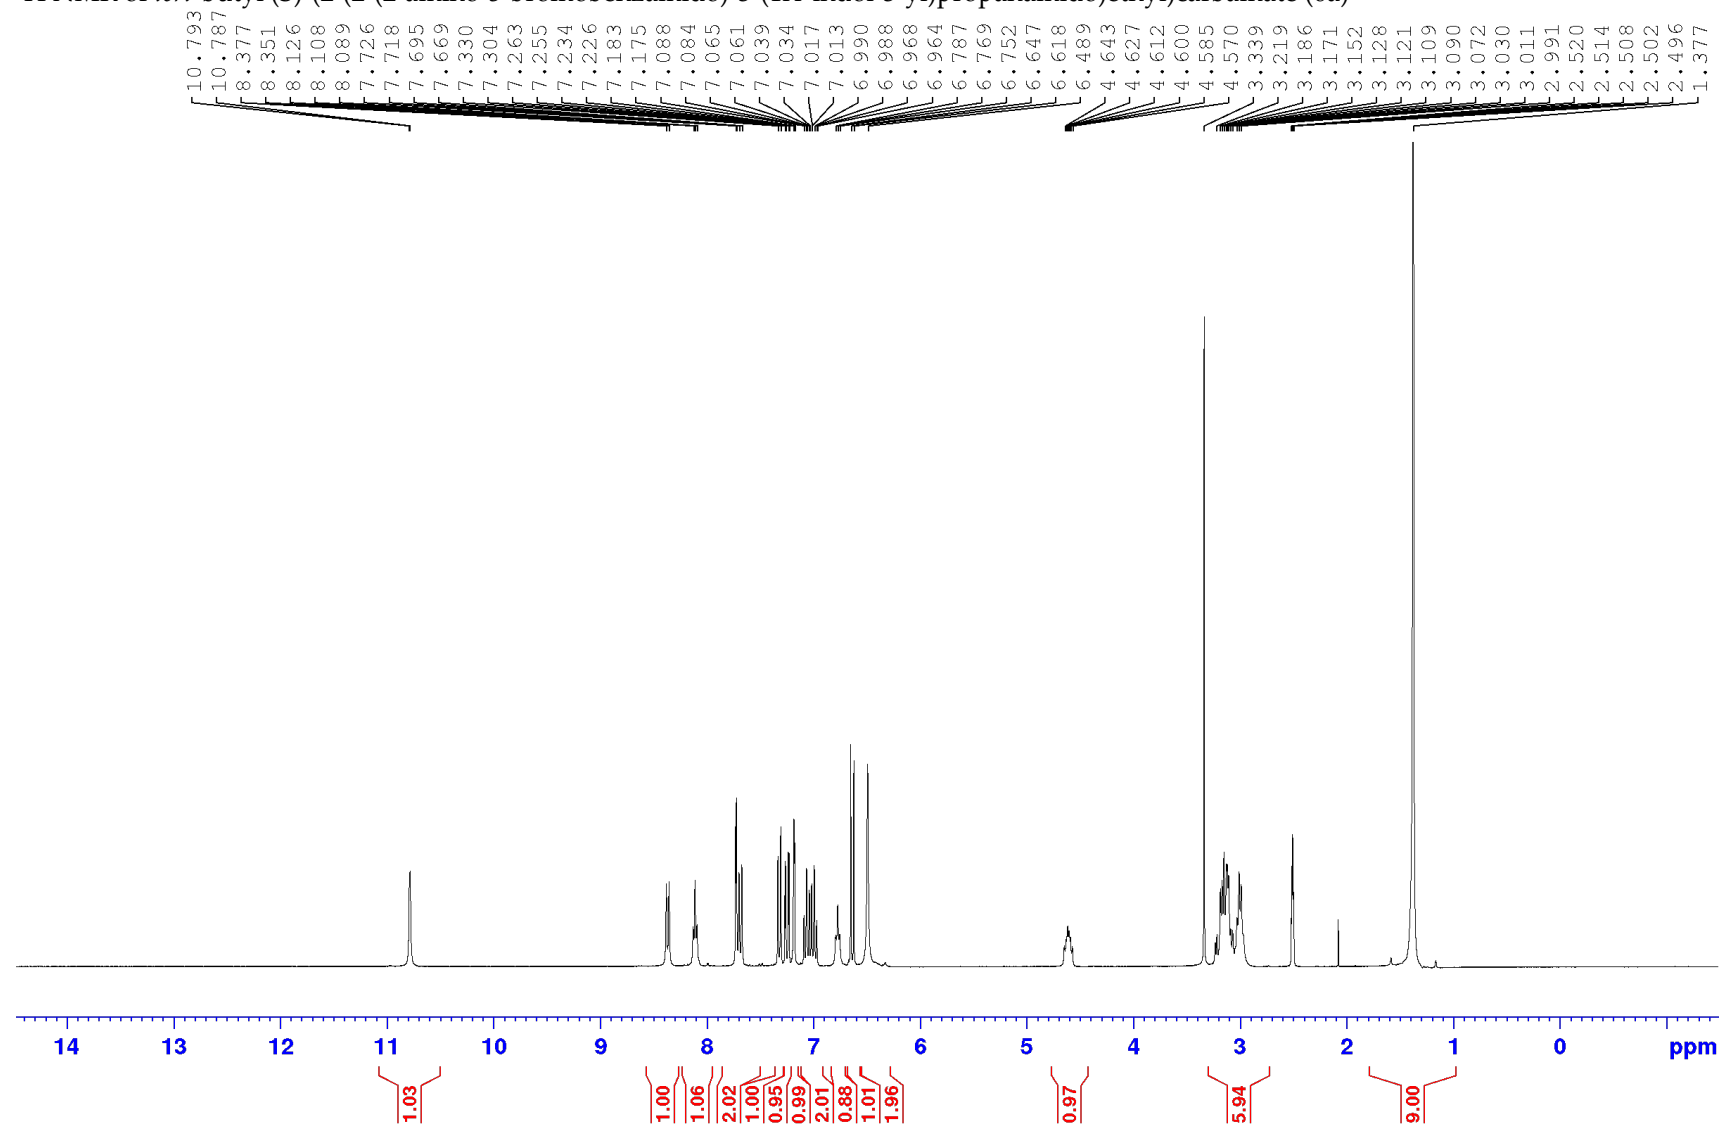

$^{13}\text{C}$  NMR of *tert*-butyl (S)-(2-(2-(2-amino-5-bromobenzamido)-3-(1*H*-indol-3-yl)propanamido)ethyl)carbamate (6a)

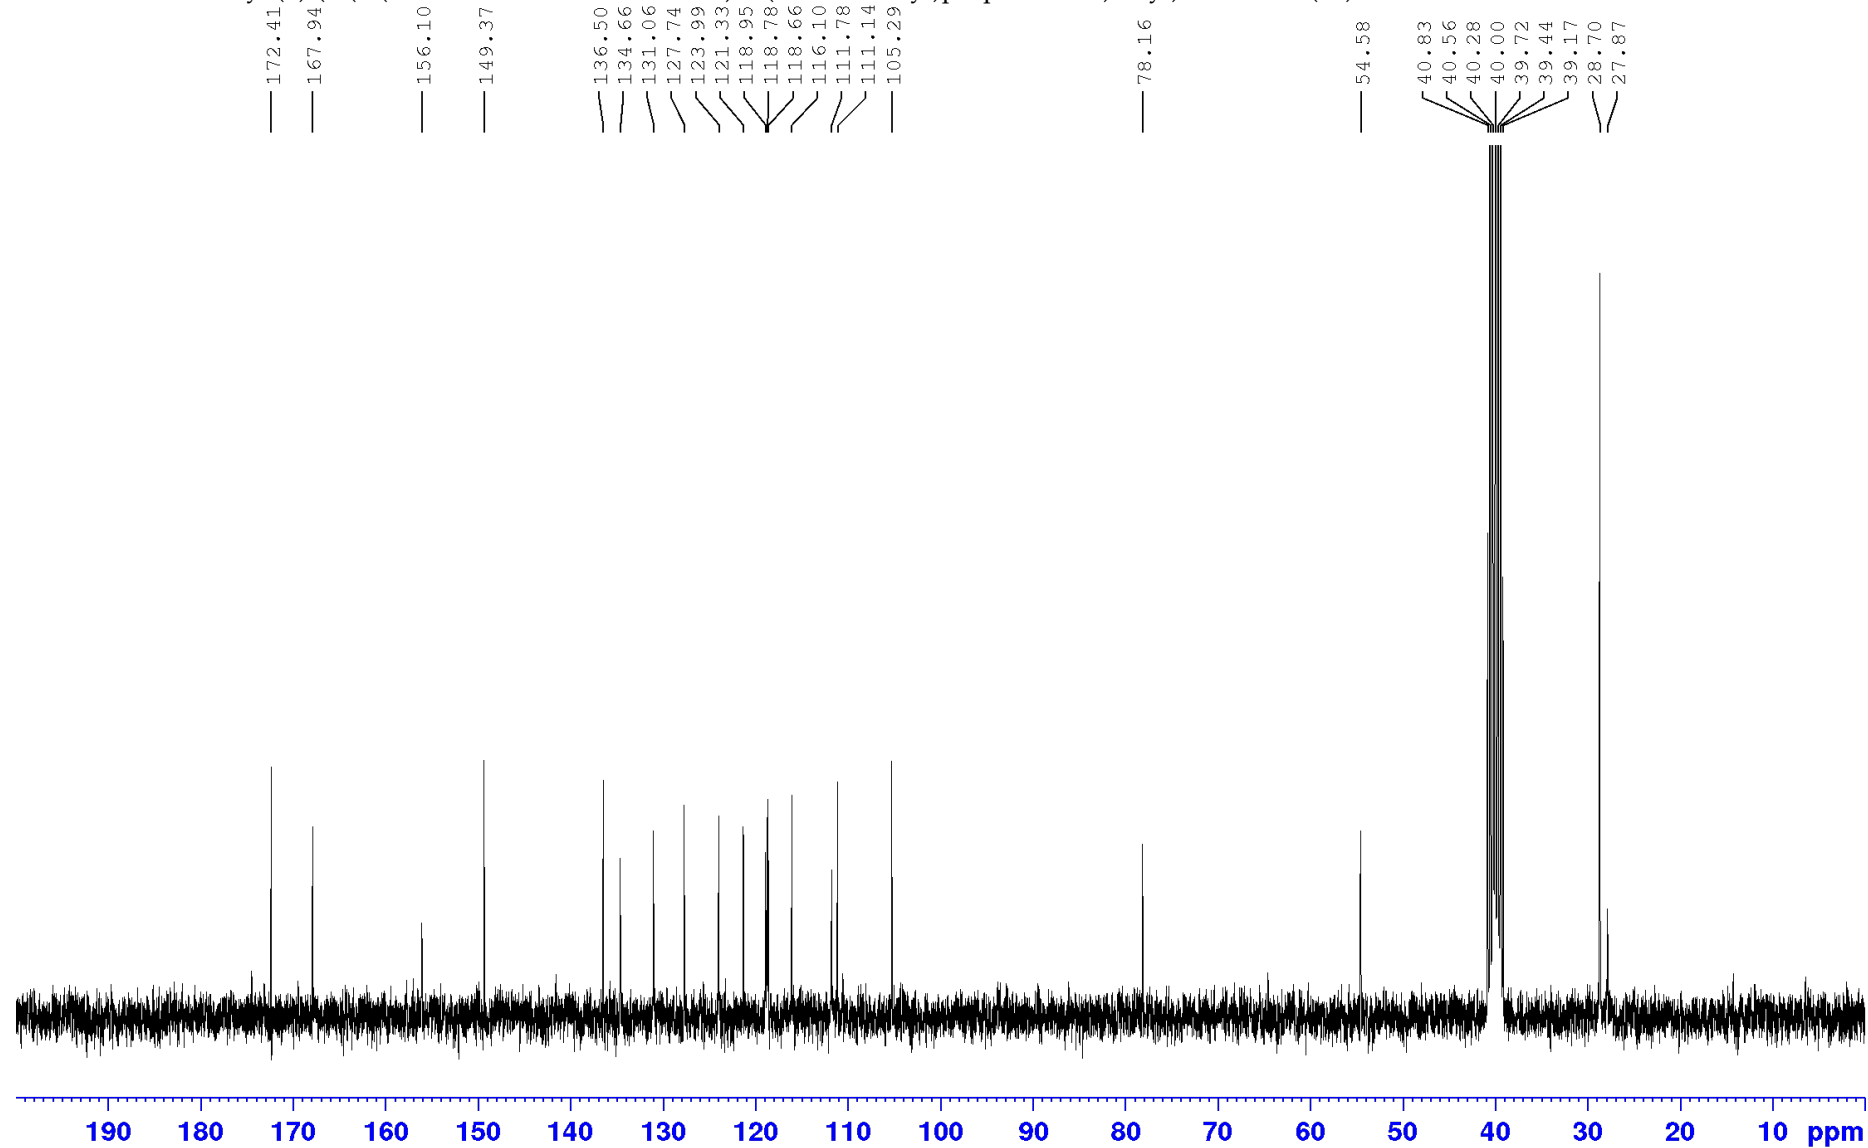

$^1\text{H}$  NMR of *tert*-butyl (S)-(3-(2-(2-amino-5-bromobenzamido)-3-(1*H*-indol-3-yl)propanamido)propyl)carbamate (6b)

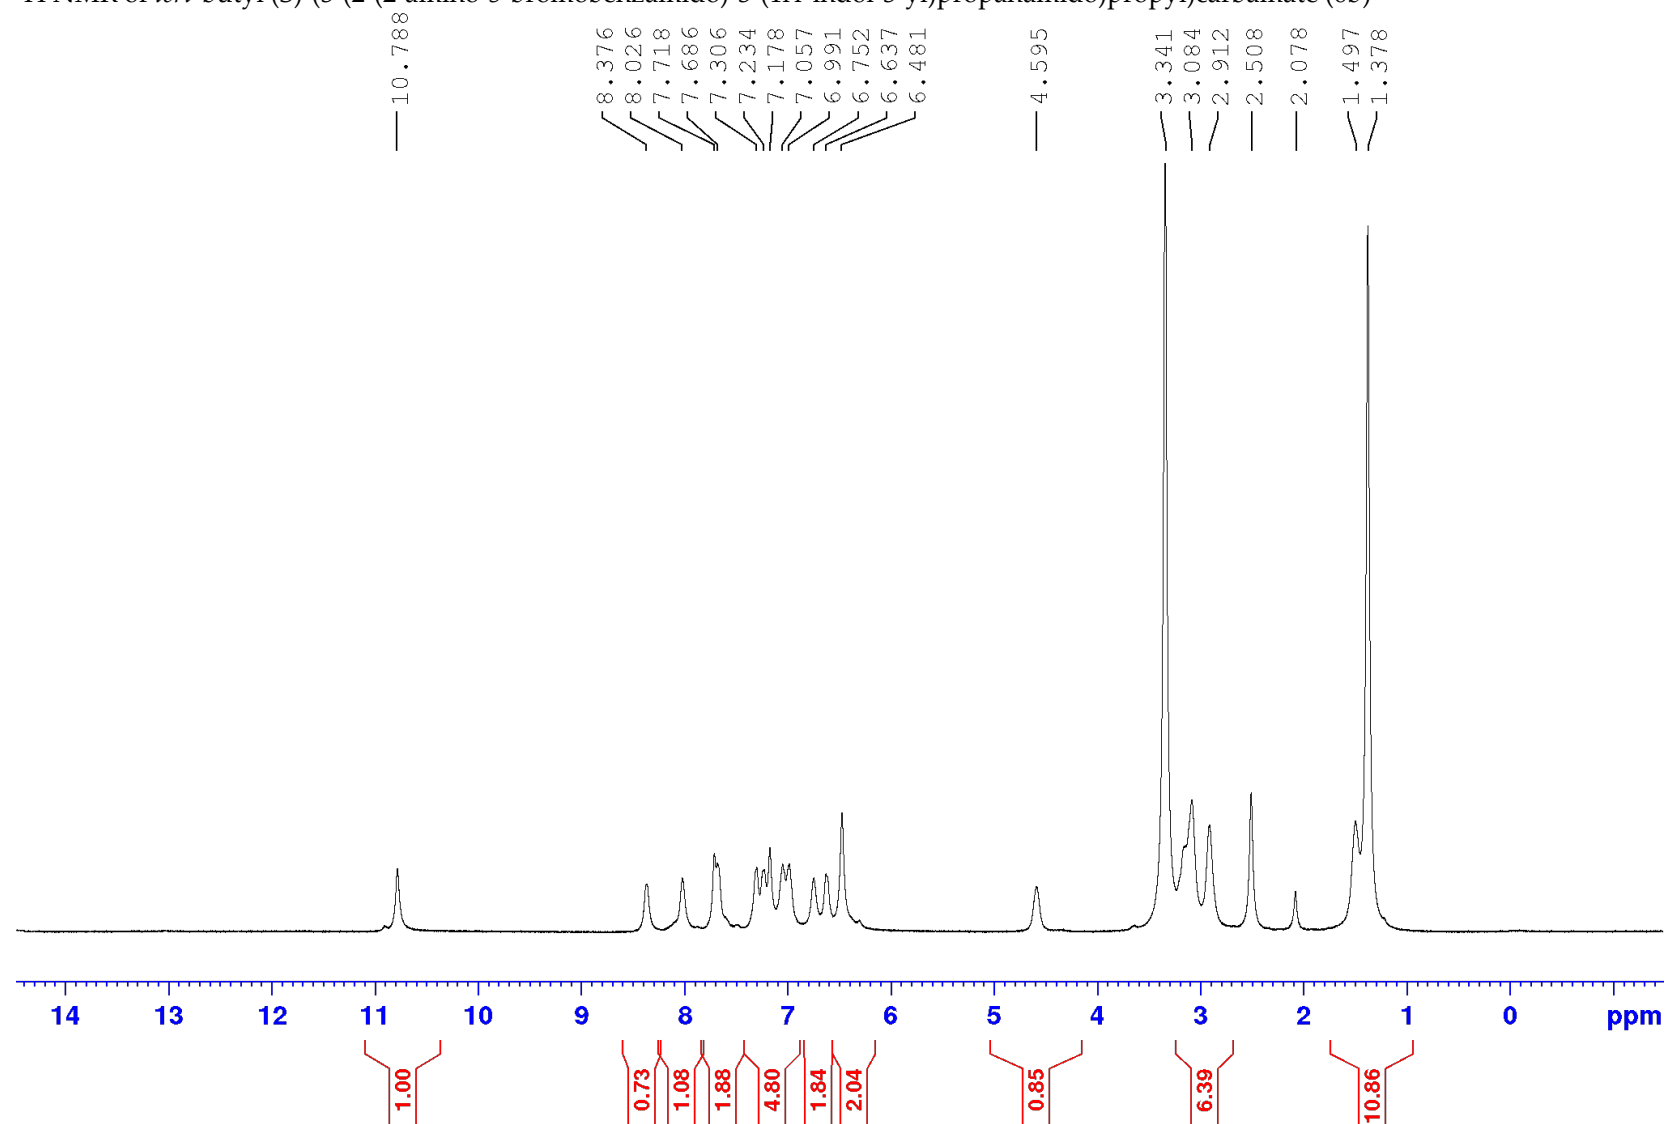

$^{13}\text{C}$  NMR of *tert*-butyl (S)-(3-(2-(2-amino-5-bromobenzamido)-3-(1*H*-indol-3-yl)propanamido)propyl)carbamate (6b)

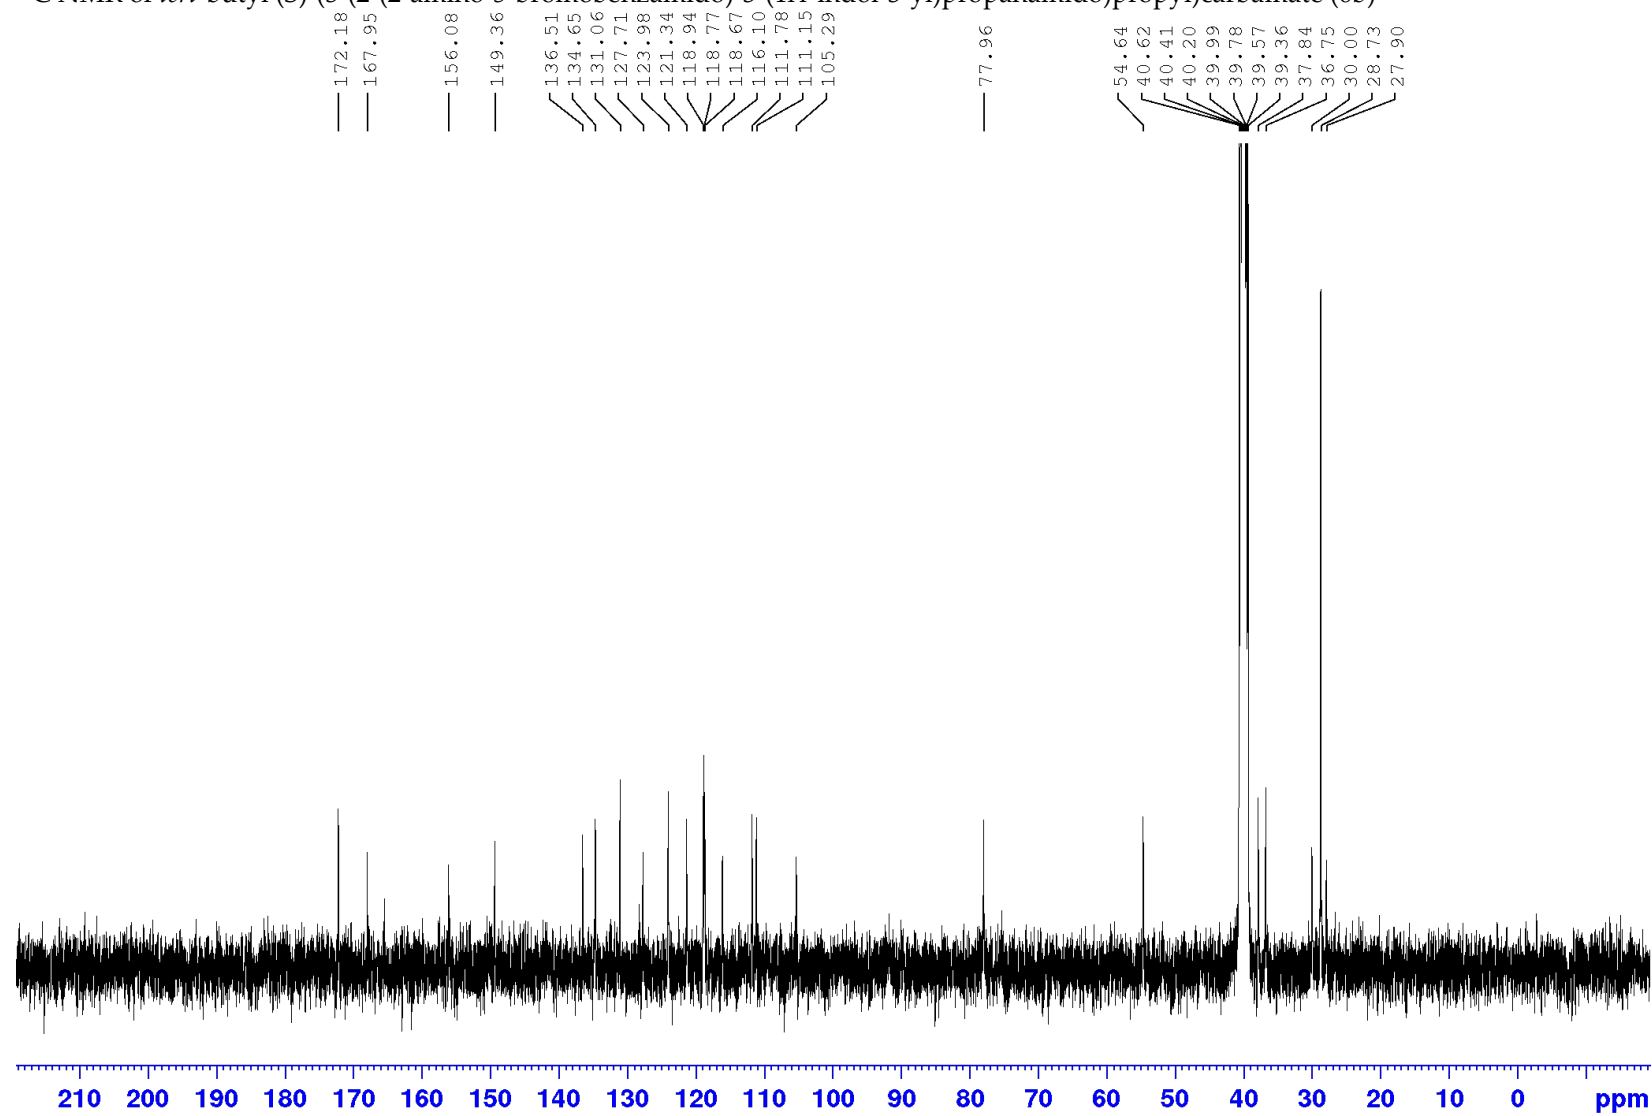

<sup>1</sup>H NMR of *tert*-butyl (S)-(2-(2-(5-bromo-2-(2-(naphthalen-1-yl)acetamido)benzamido)-3-(1*H*-indol-3-yl)propanamido)ethyl)carbamate (10b)

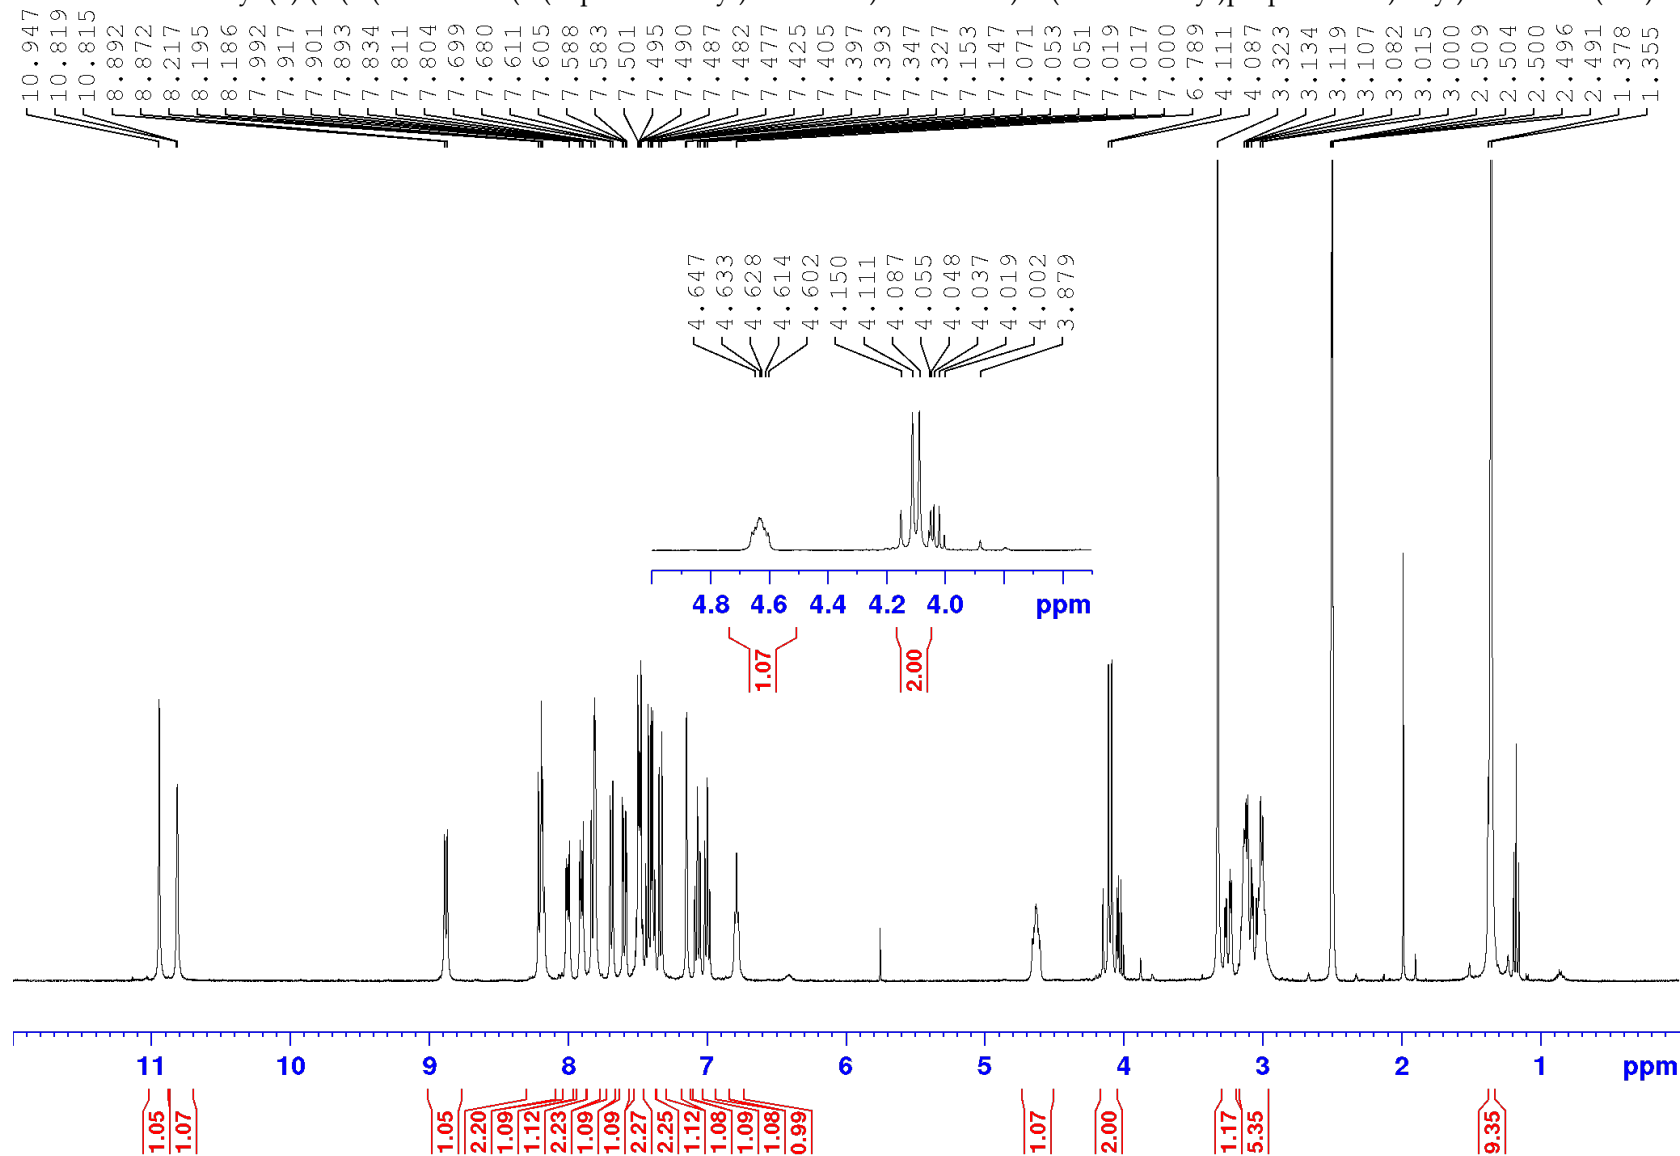

$^{13}\text{C}$  NMR of *tert*-butyl (S)-(2-(2-(5-bromo-2-(2-(naphthalen-1-yl)acetamido)benzamido)-3-(1*H*-indol-3-yl)propanamido)ethyl)carbamate (10b)

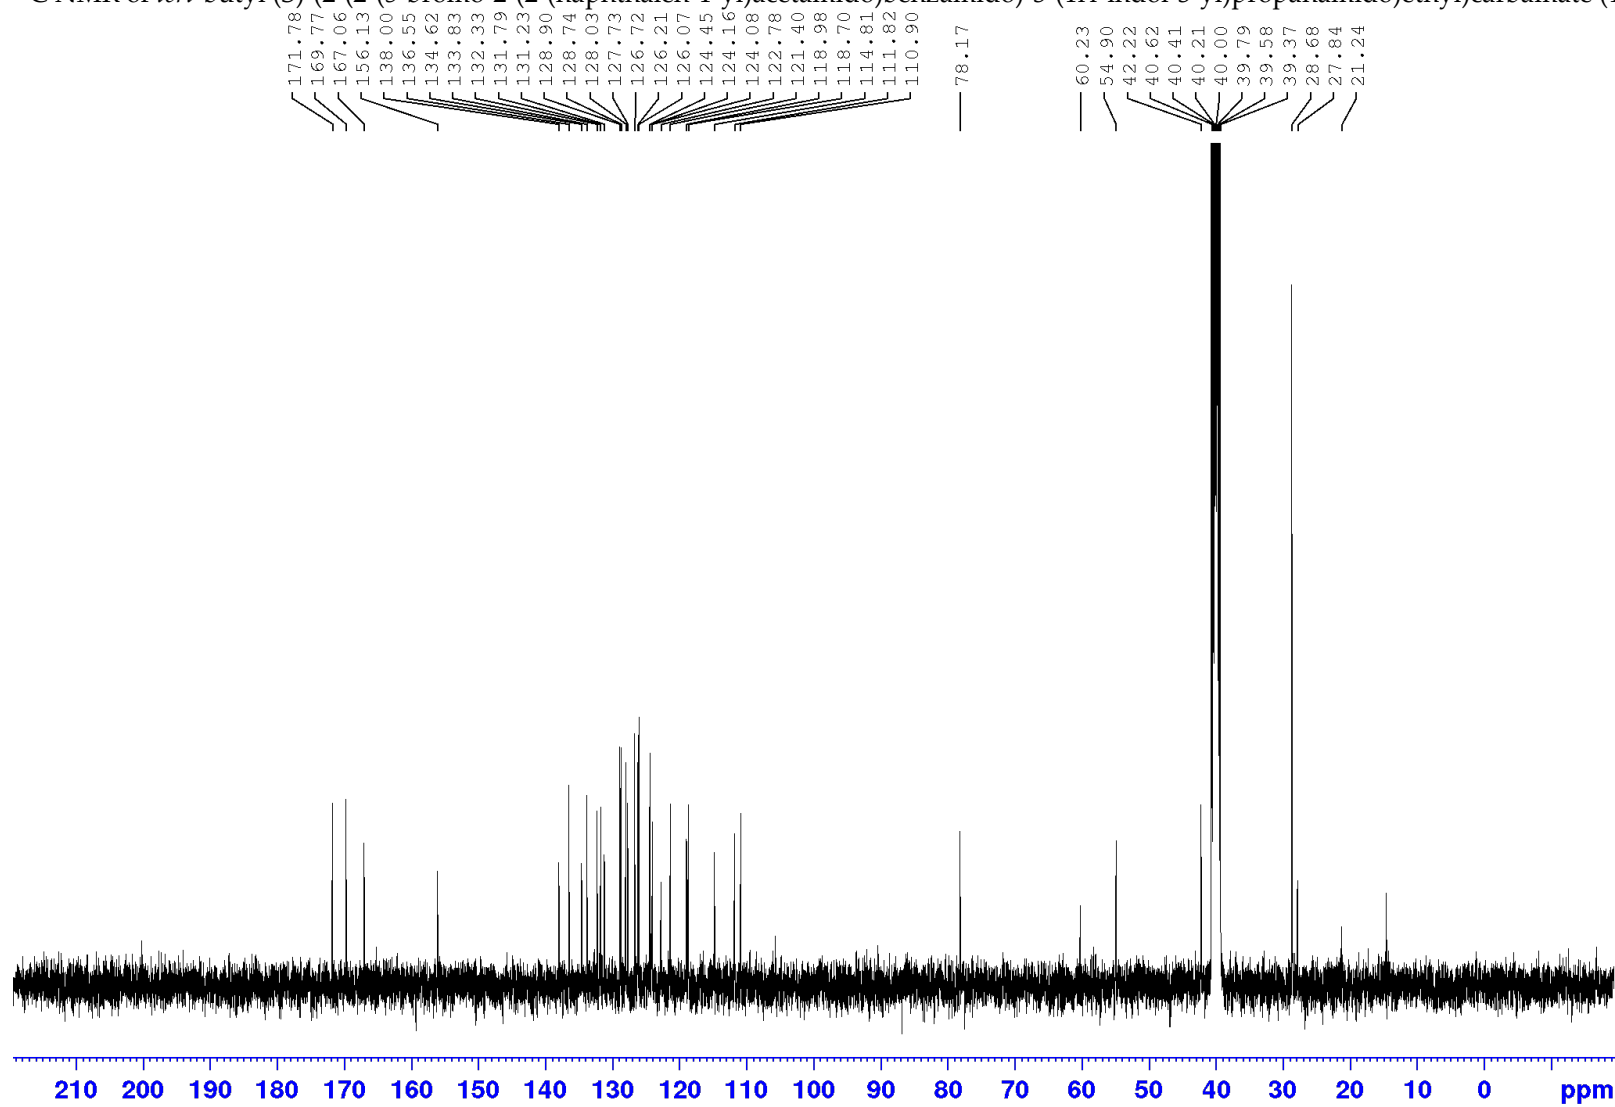

<sup>1</sup>H NMR of *tert*-butyl (S)-(2-(2-(5-bromo-2-(2-methoxy-1-naphthamido)benzamido)-3-(1H-indol-3-yl)propanamido)ethyl)carbamate (10c)

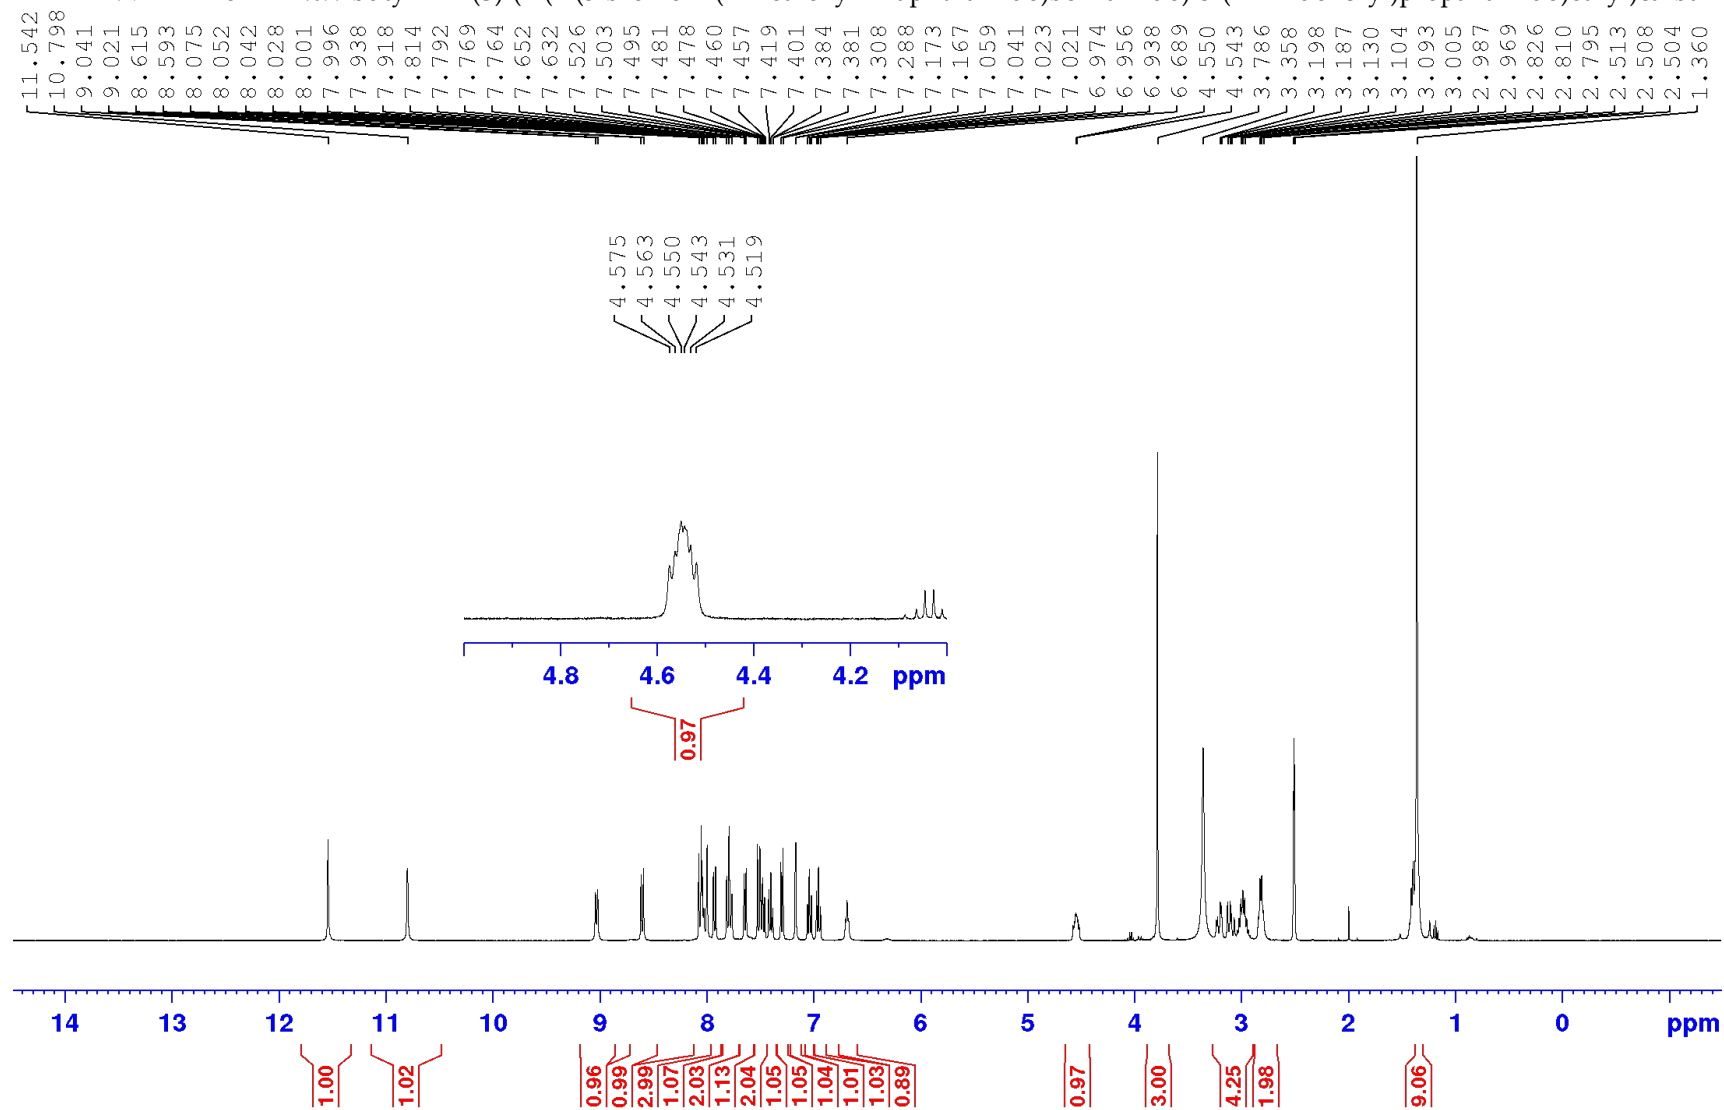



$^{13}\text{C}$  NMR of *tert*-butyl (S)-2-(2-(5-bromo-2-(2-methoxy-1-naphthamido)benzamido)-3-(1H-indol-3-yl)propanamido)ethyl carbamate (10c)

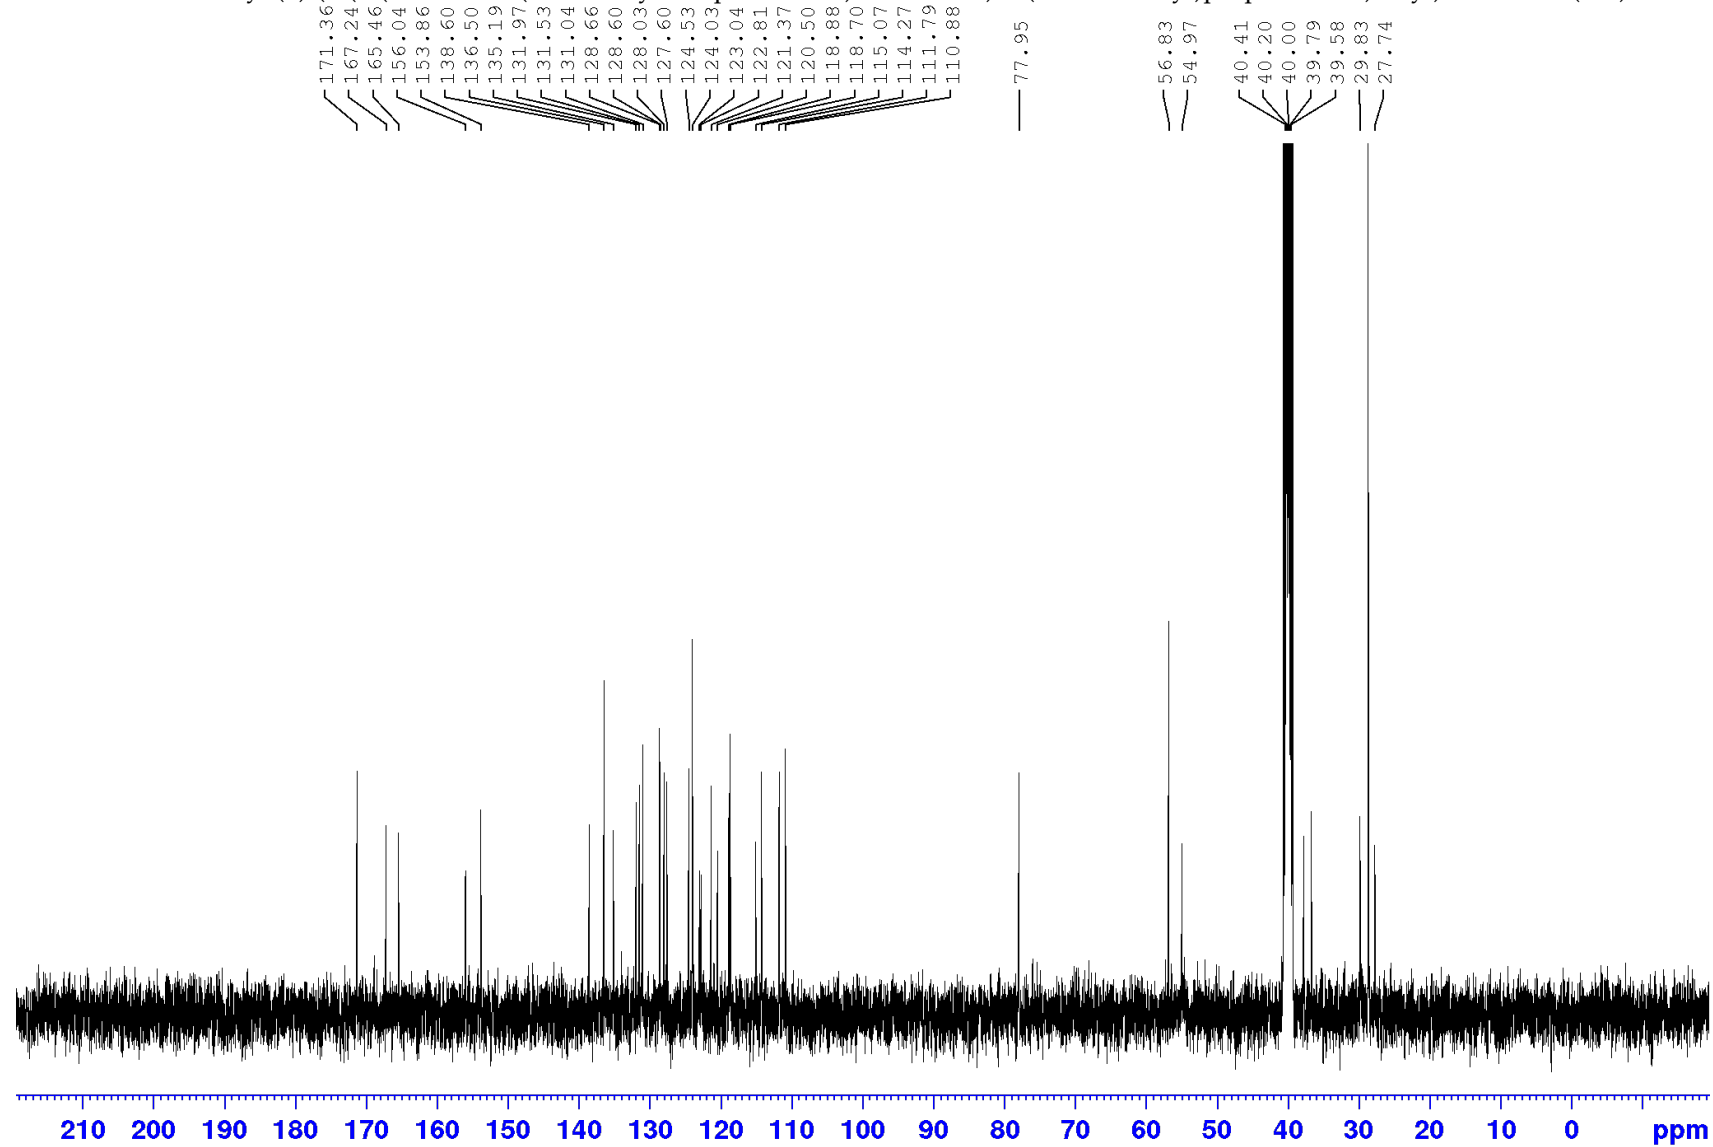

<sup>1</sup>H NMR of *tert*-butyl (S)-(2-(2-(5-bromo-2-(3-methoxy-2-naphthamido)benzamido)-3-(1H-indol-3-yl)propanamido)ethyl)carbamate (10d)

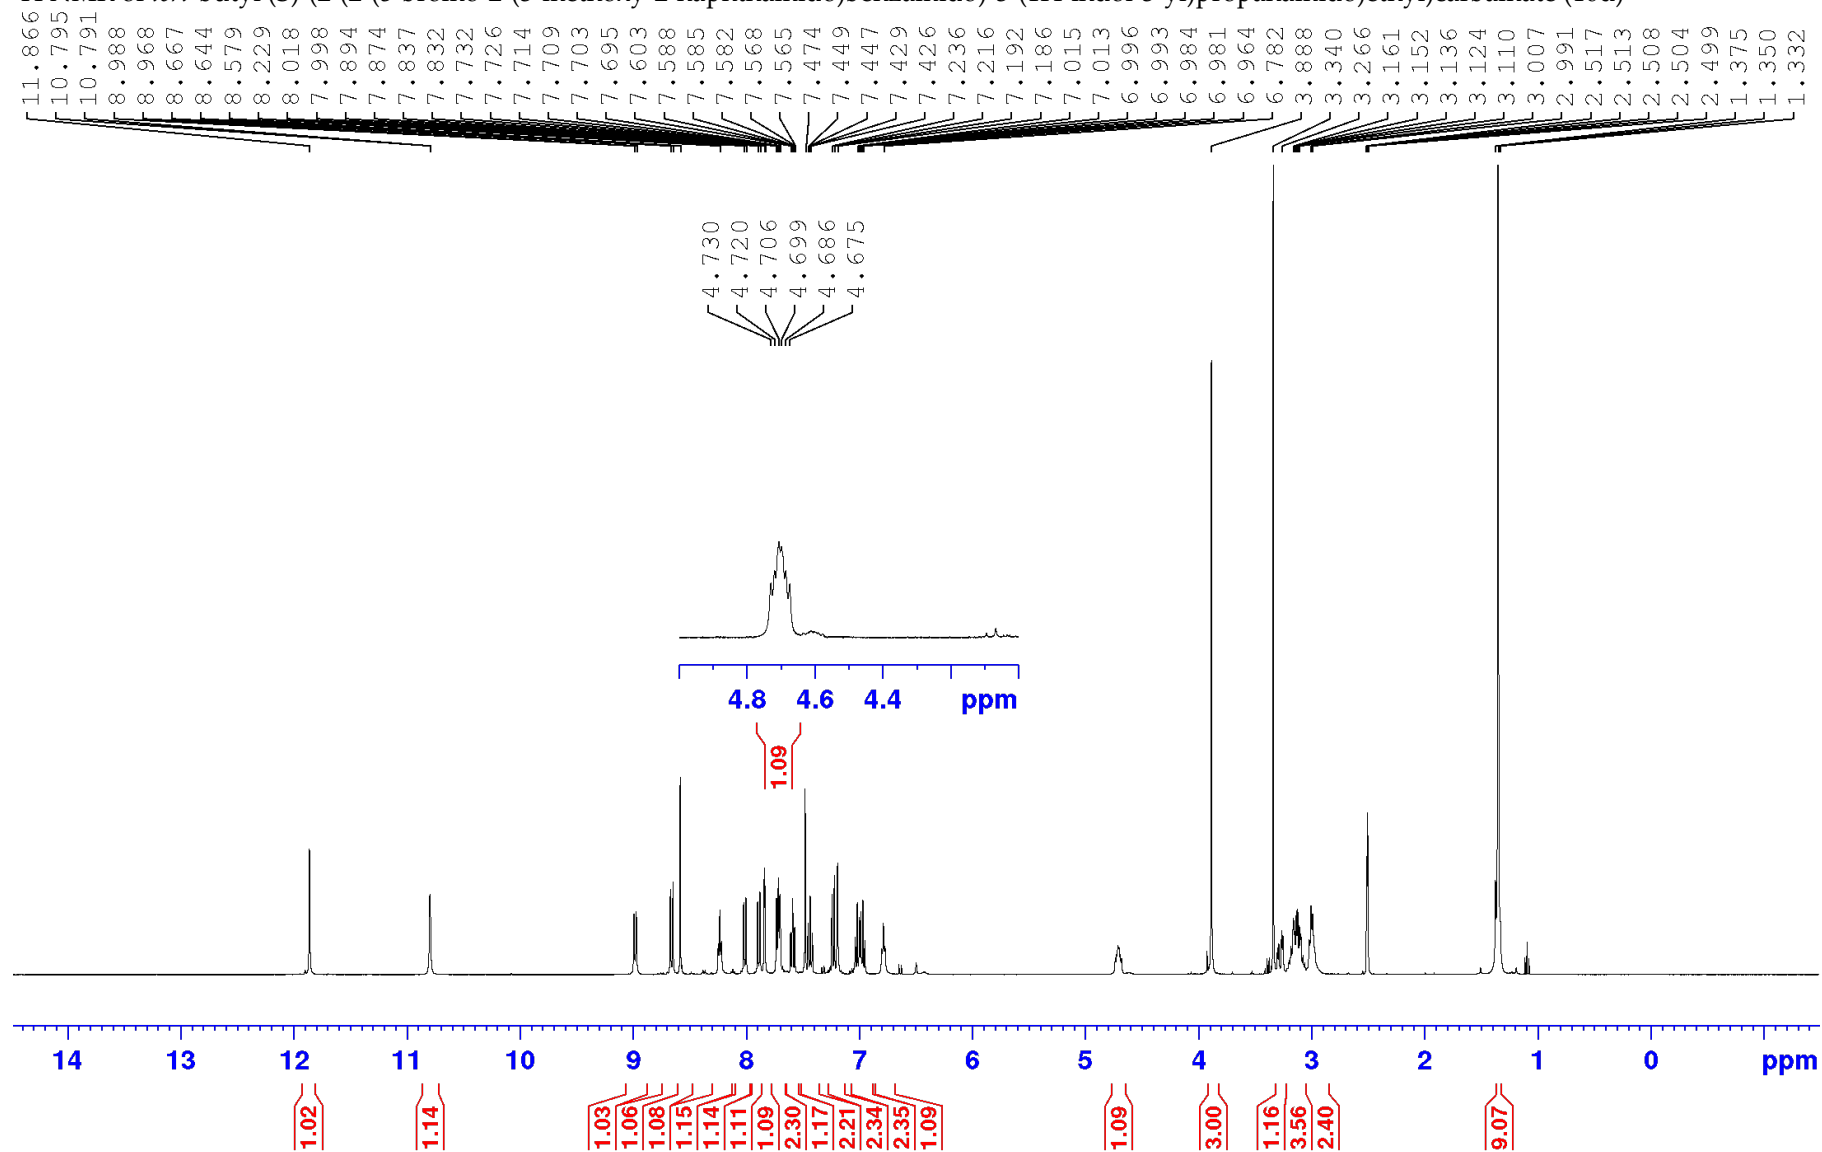

$^{13}\text{C}$  NMR of *tert*-butyl (S)-(2-(2-(5-bromo-2-(3-methoxy-2-naphthamido)benzamido)-3-(1H-indol-3-yl)propanamido)ethyl)carbamate (10d)

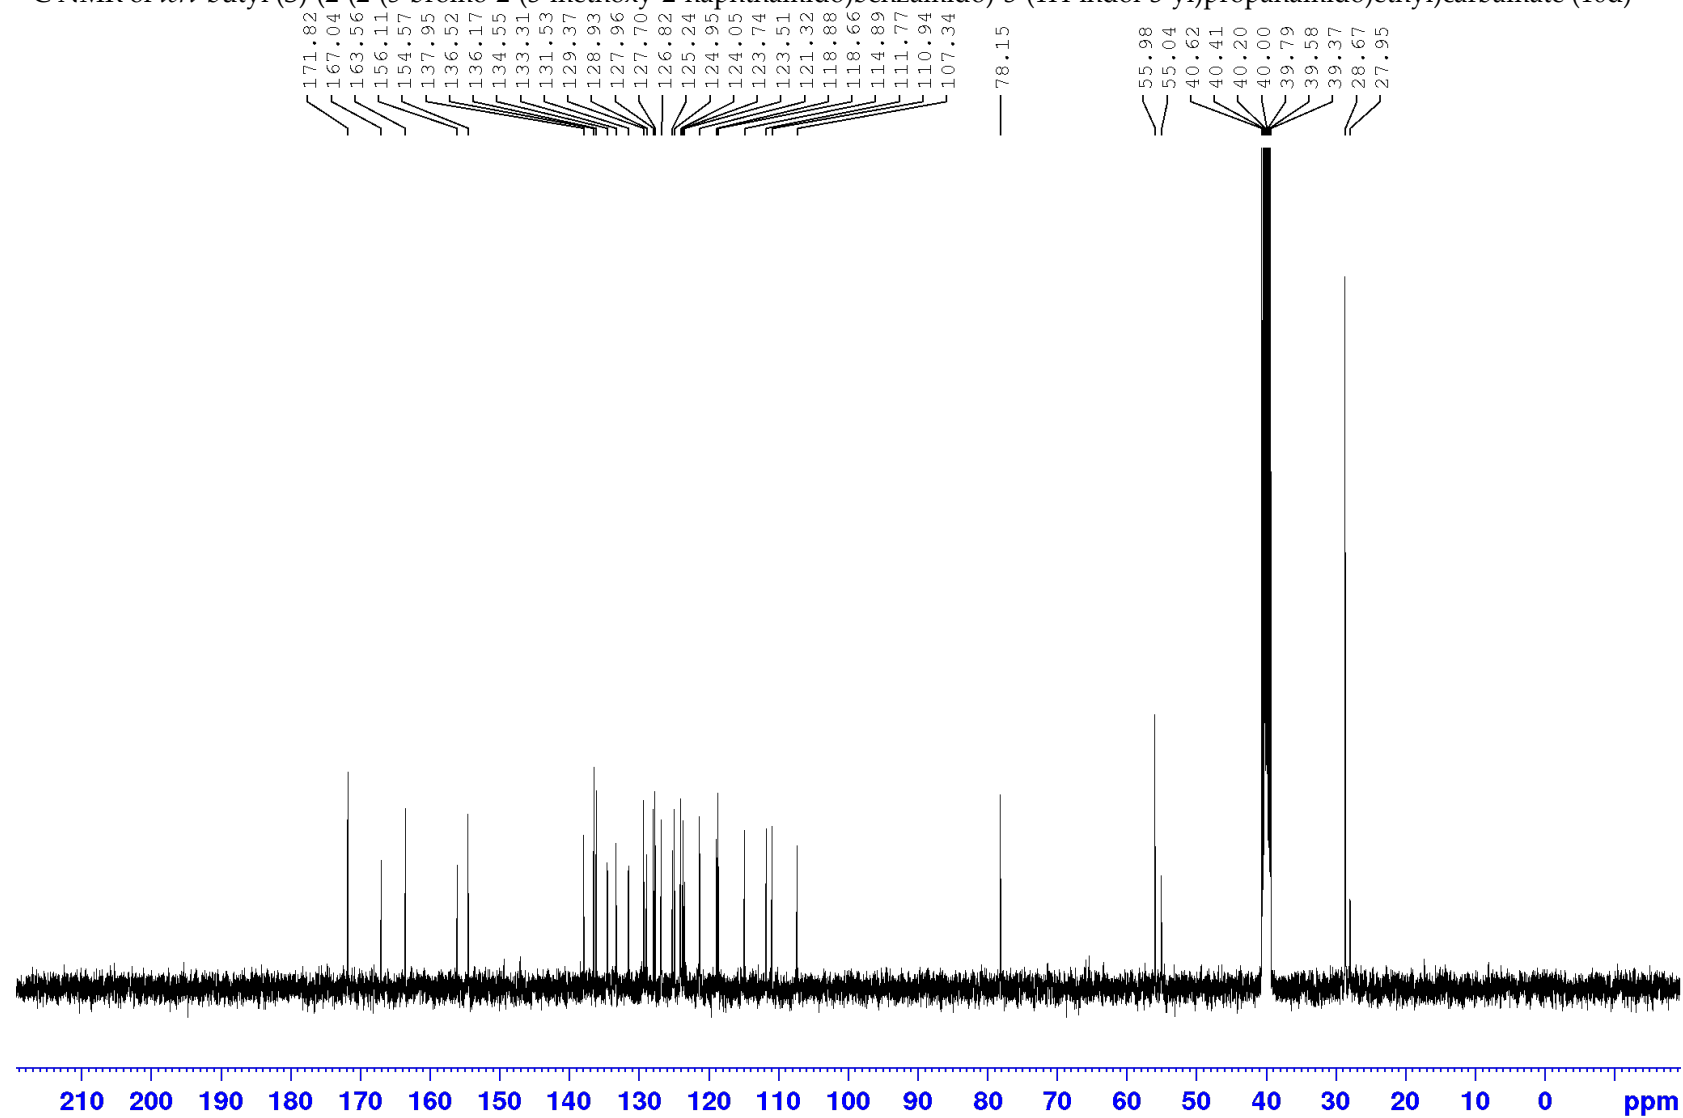

<sup>1</sup>H NMR of *tert*-butyl (S)-(2-(2-(5-bromo-2-(quinoline-2-carboxamido)benzamido)-3-(1H-indol-3-yl)propanamido)ethyl)carbamate (10e)

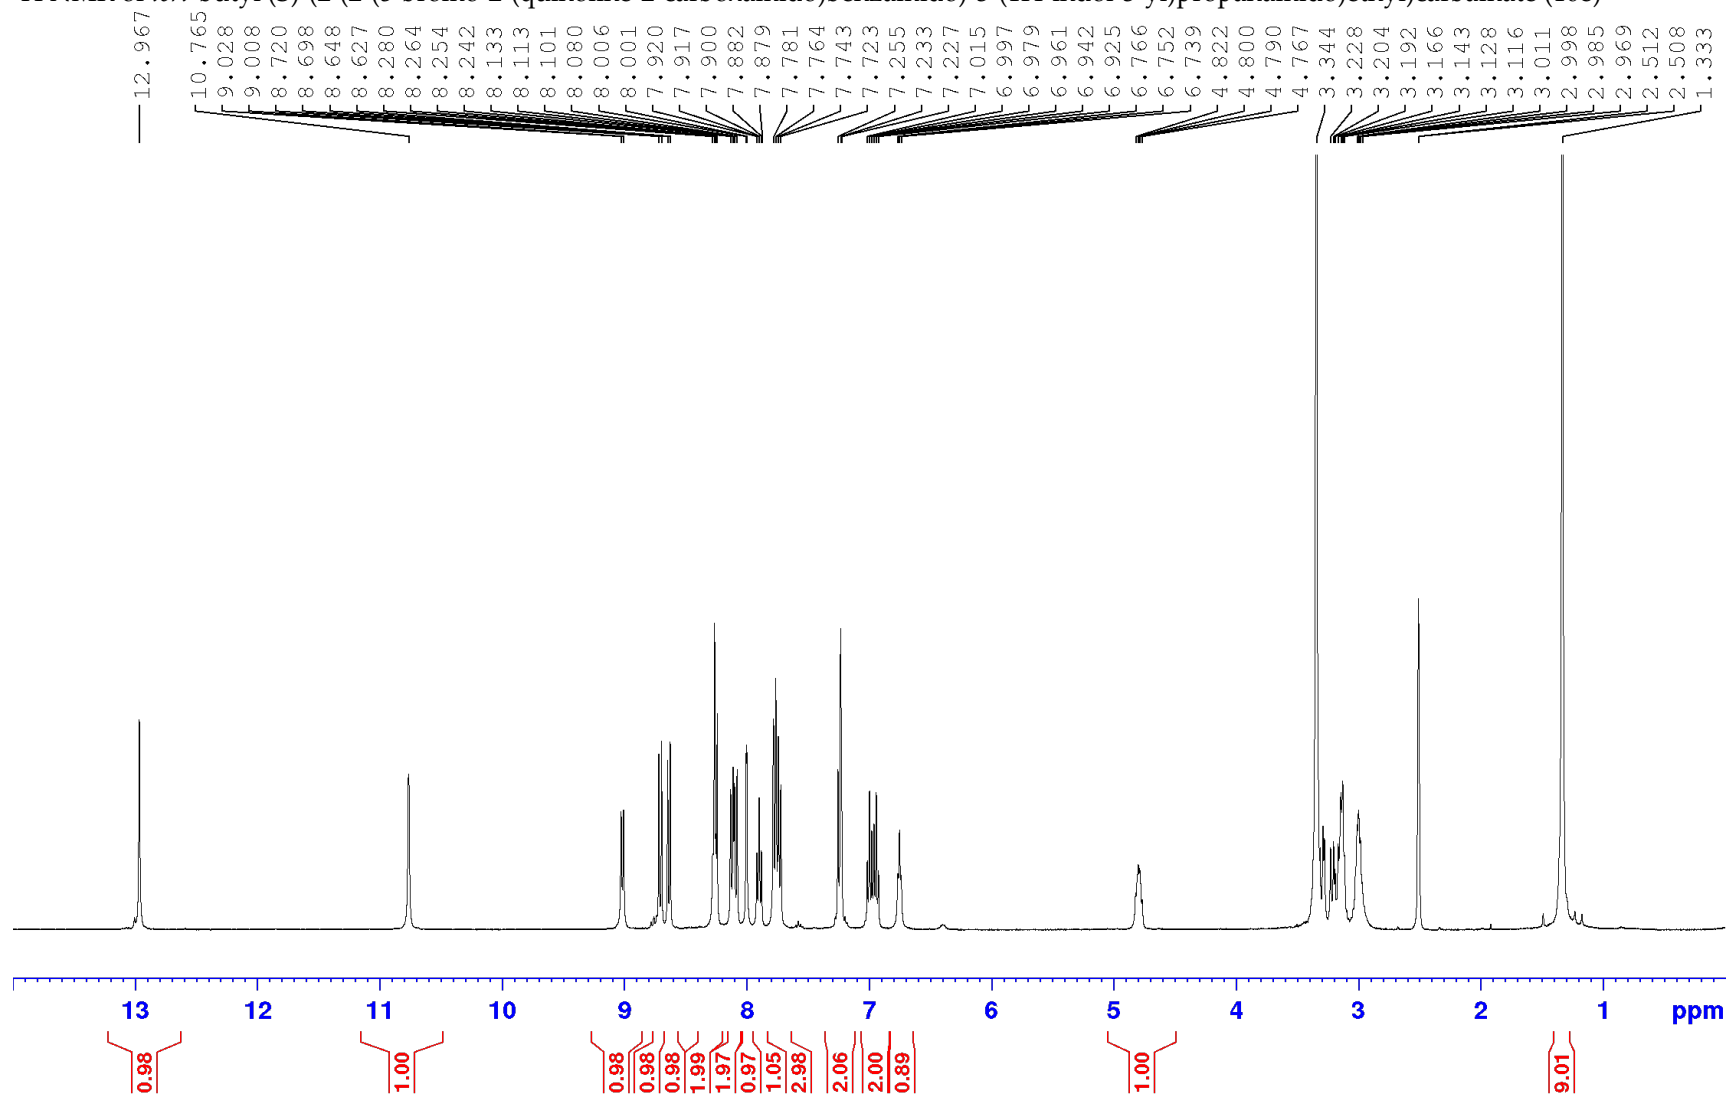

<sup>1</sup>H NMR of *tert*-butyl (S)-(2-(2-(5-bromo-2-(1H-indole-2-carboxamido)benzamido)-3-(1H-indol-3-yl)propanamido)ethyl)carbamate (10f)

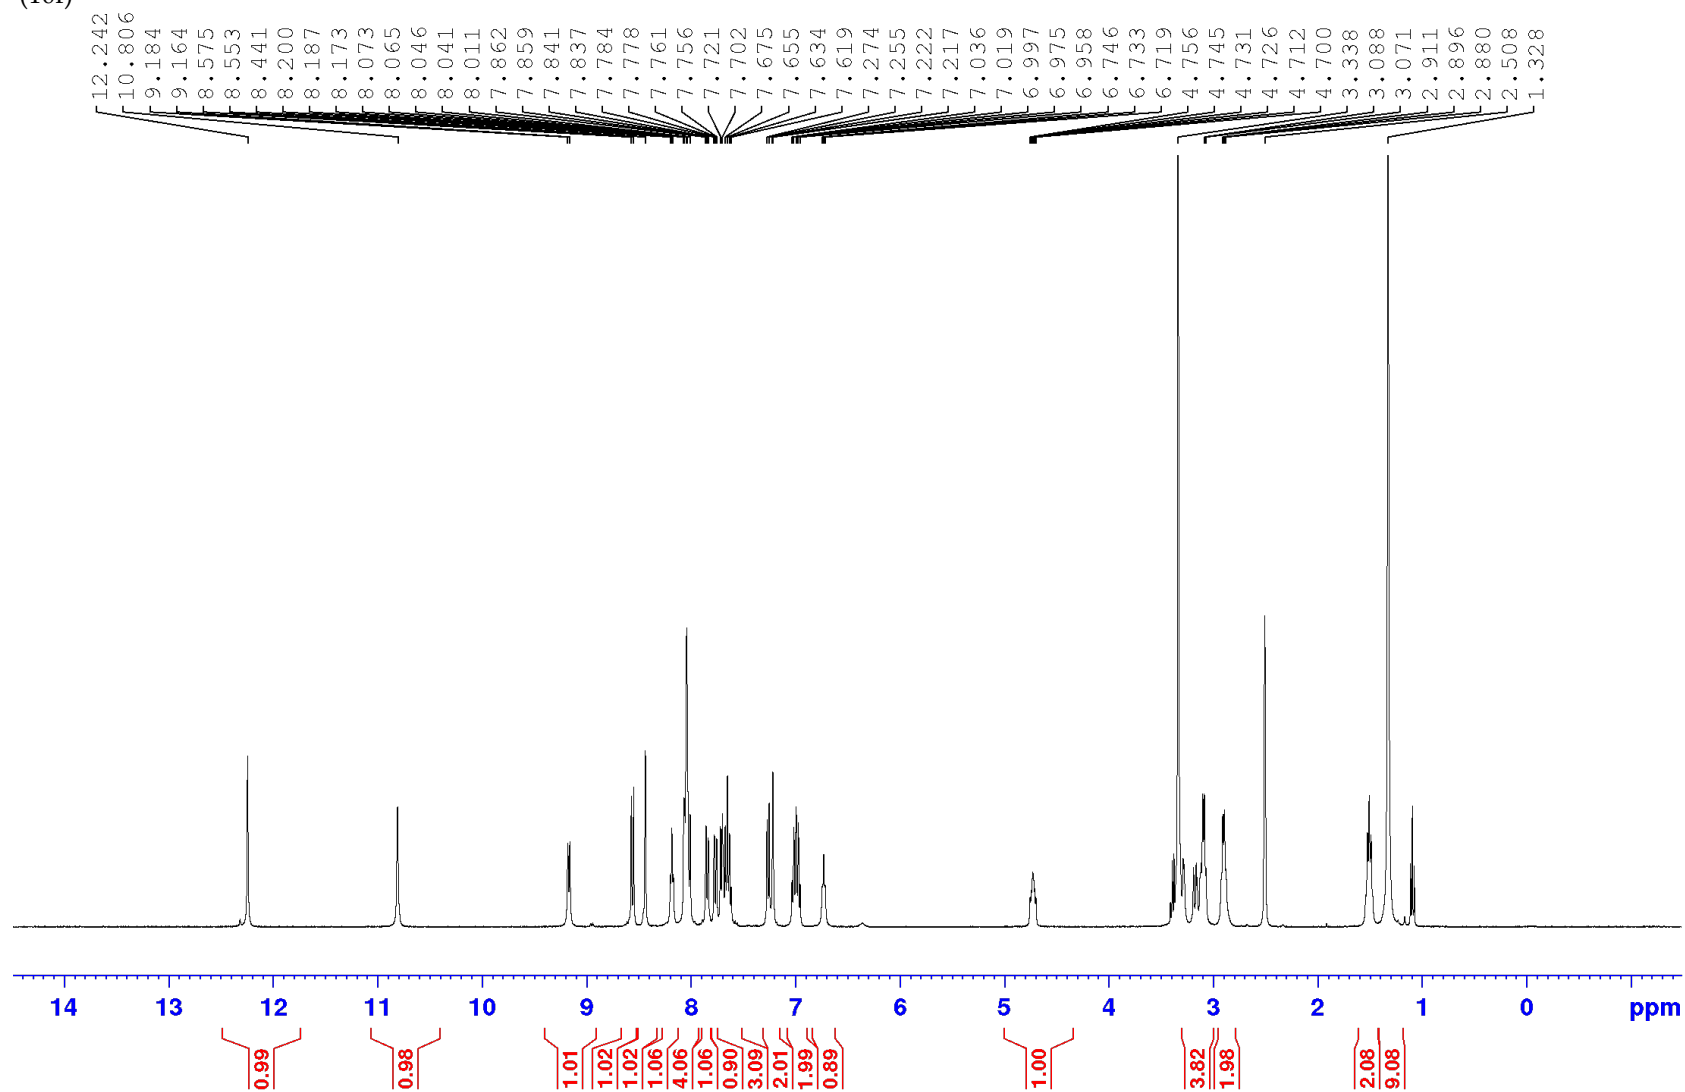

$^{13}\text{C}$  NMR of *tert*-butyl (S)-(2-(2-(5-bromo-2-(1H-indole-2-carboxamido)benzamido)-3-(1H-indol-3-yl)propanamido)ethyl)carbamate (10f)

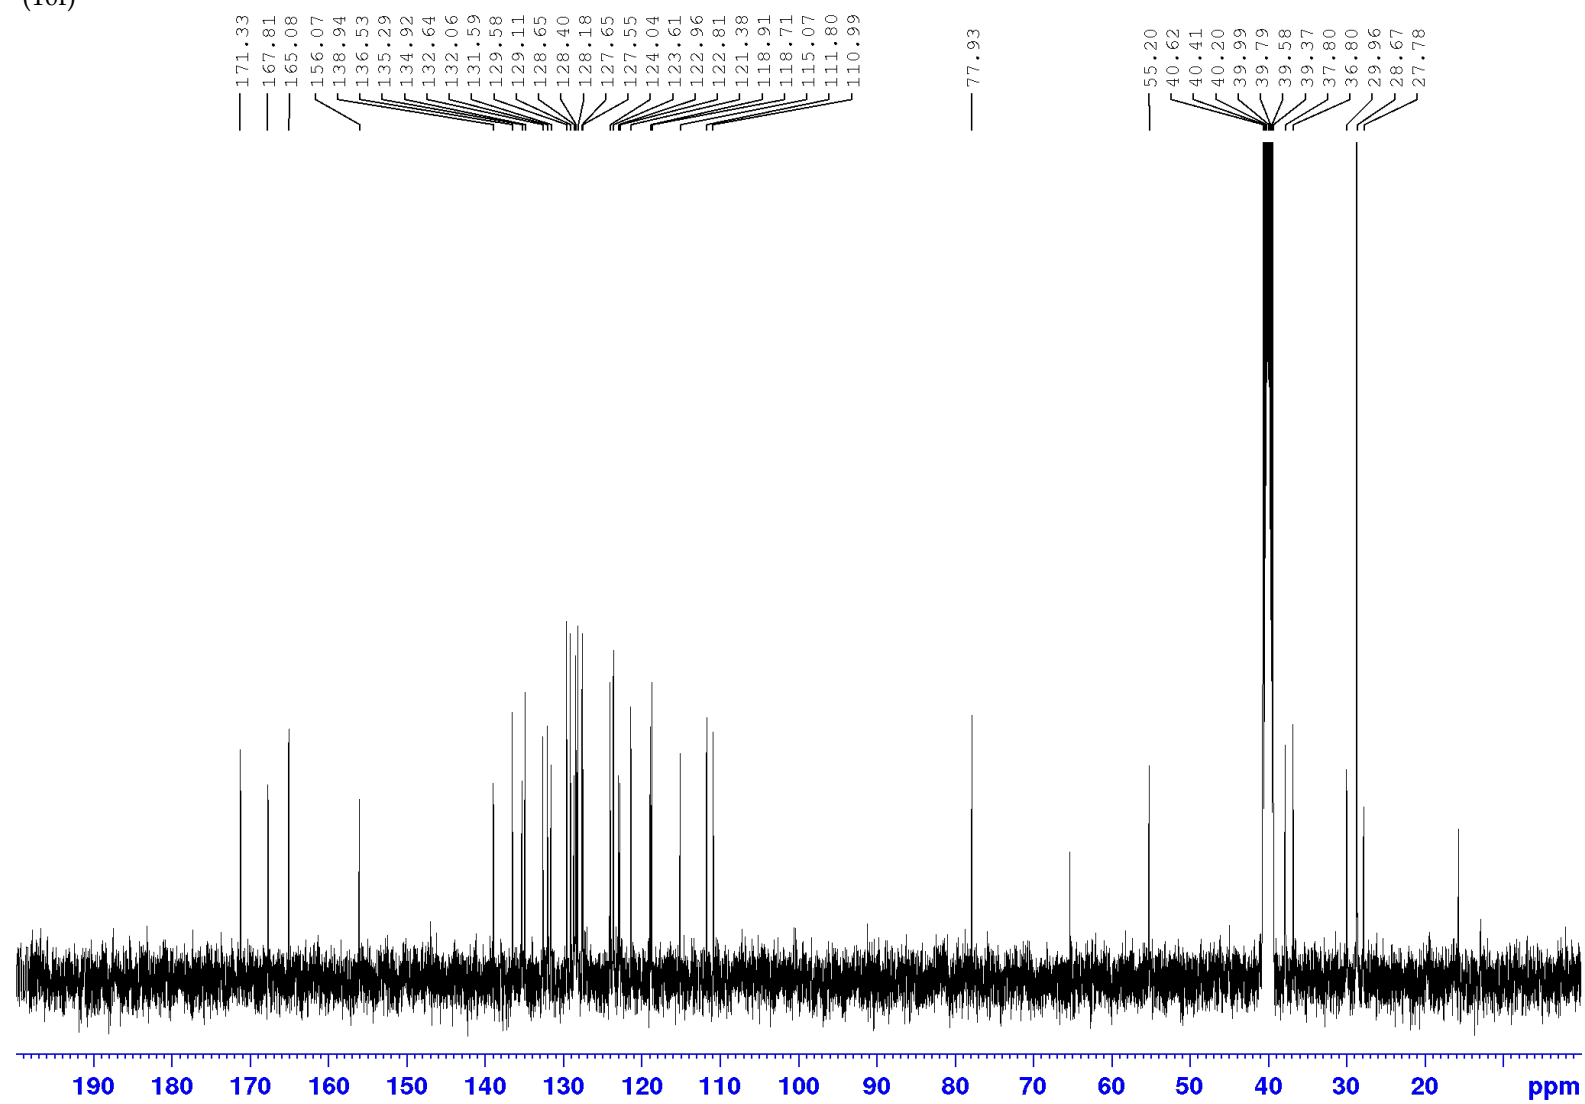

<sup>1</sup>H NMR of *tert*-butyl (S)-(2-(2-(5-bromo-2-(thiophene-2-carboxamido)benzamido)-3-(1H-indol-3-yl)propanamido)ethyl)carbamate (10g)

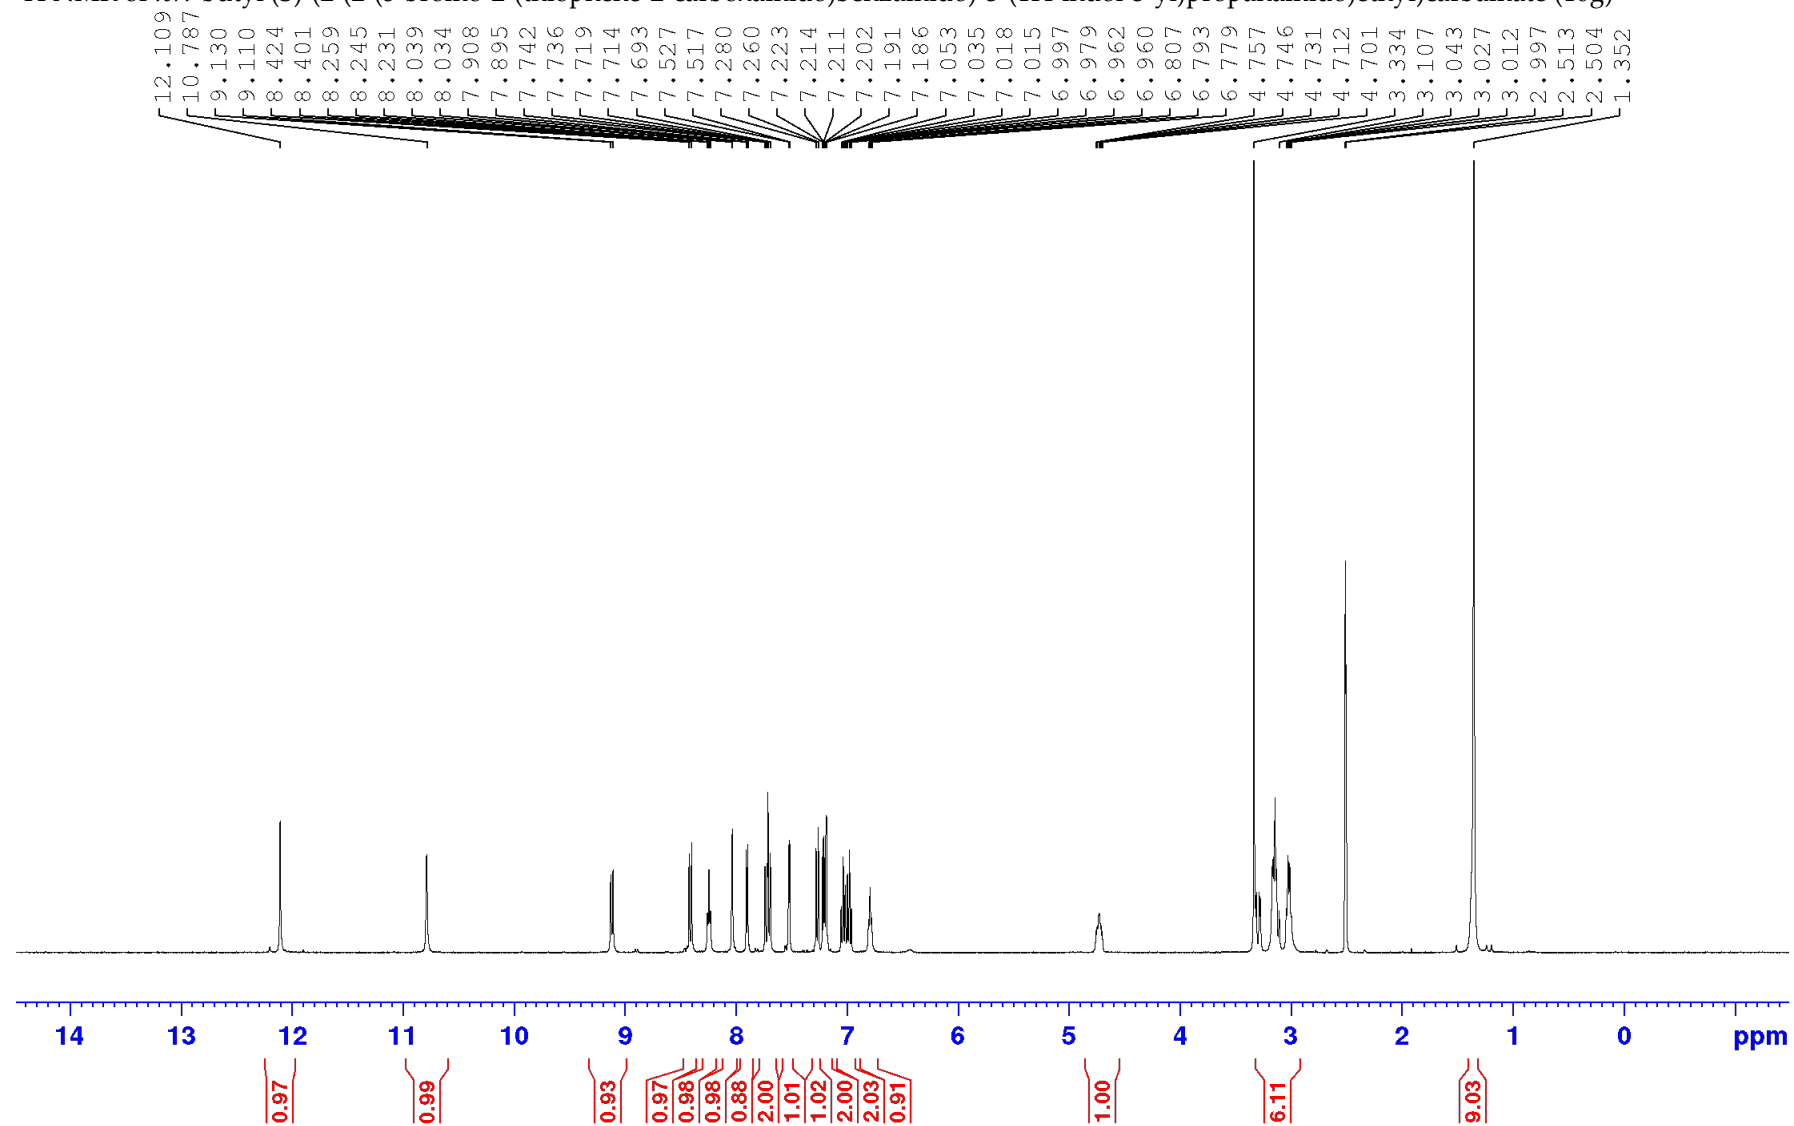

$^{13}\text{C}$  NMR of *tert*-butyl (S)-(2-(2-(5-bromo-2-(thiophene-2-carboxamido)benzamido)-3-(1H-indol-3-yl)propanamido)ethyl)carbamate (10g)

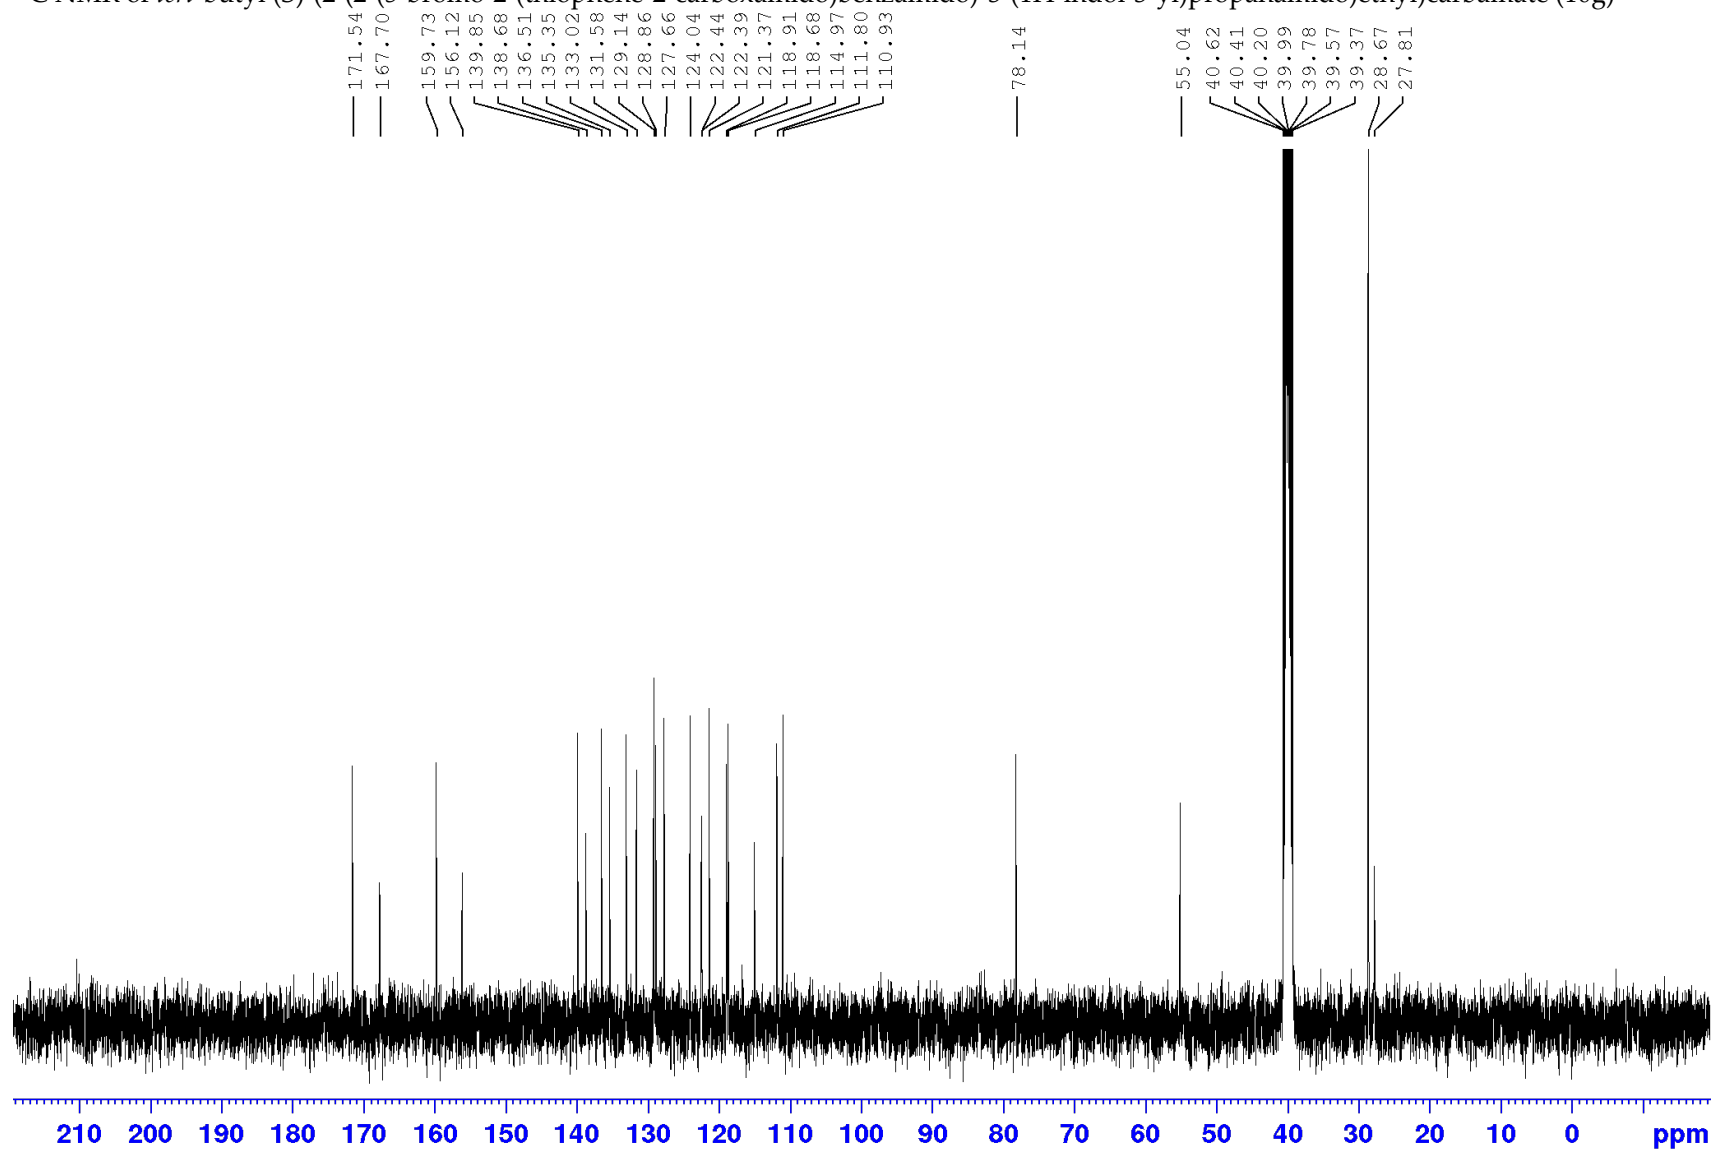



<sup>1</sup>H NMR of *tert*-butyl (S)-(2-(2-(5-bromo-2-(thiophene-3-carboxamido)benzamido)-3-(1H-indol-3-yl)propanamido)ethyl)carbamate (10h)

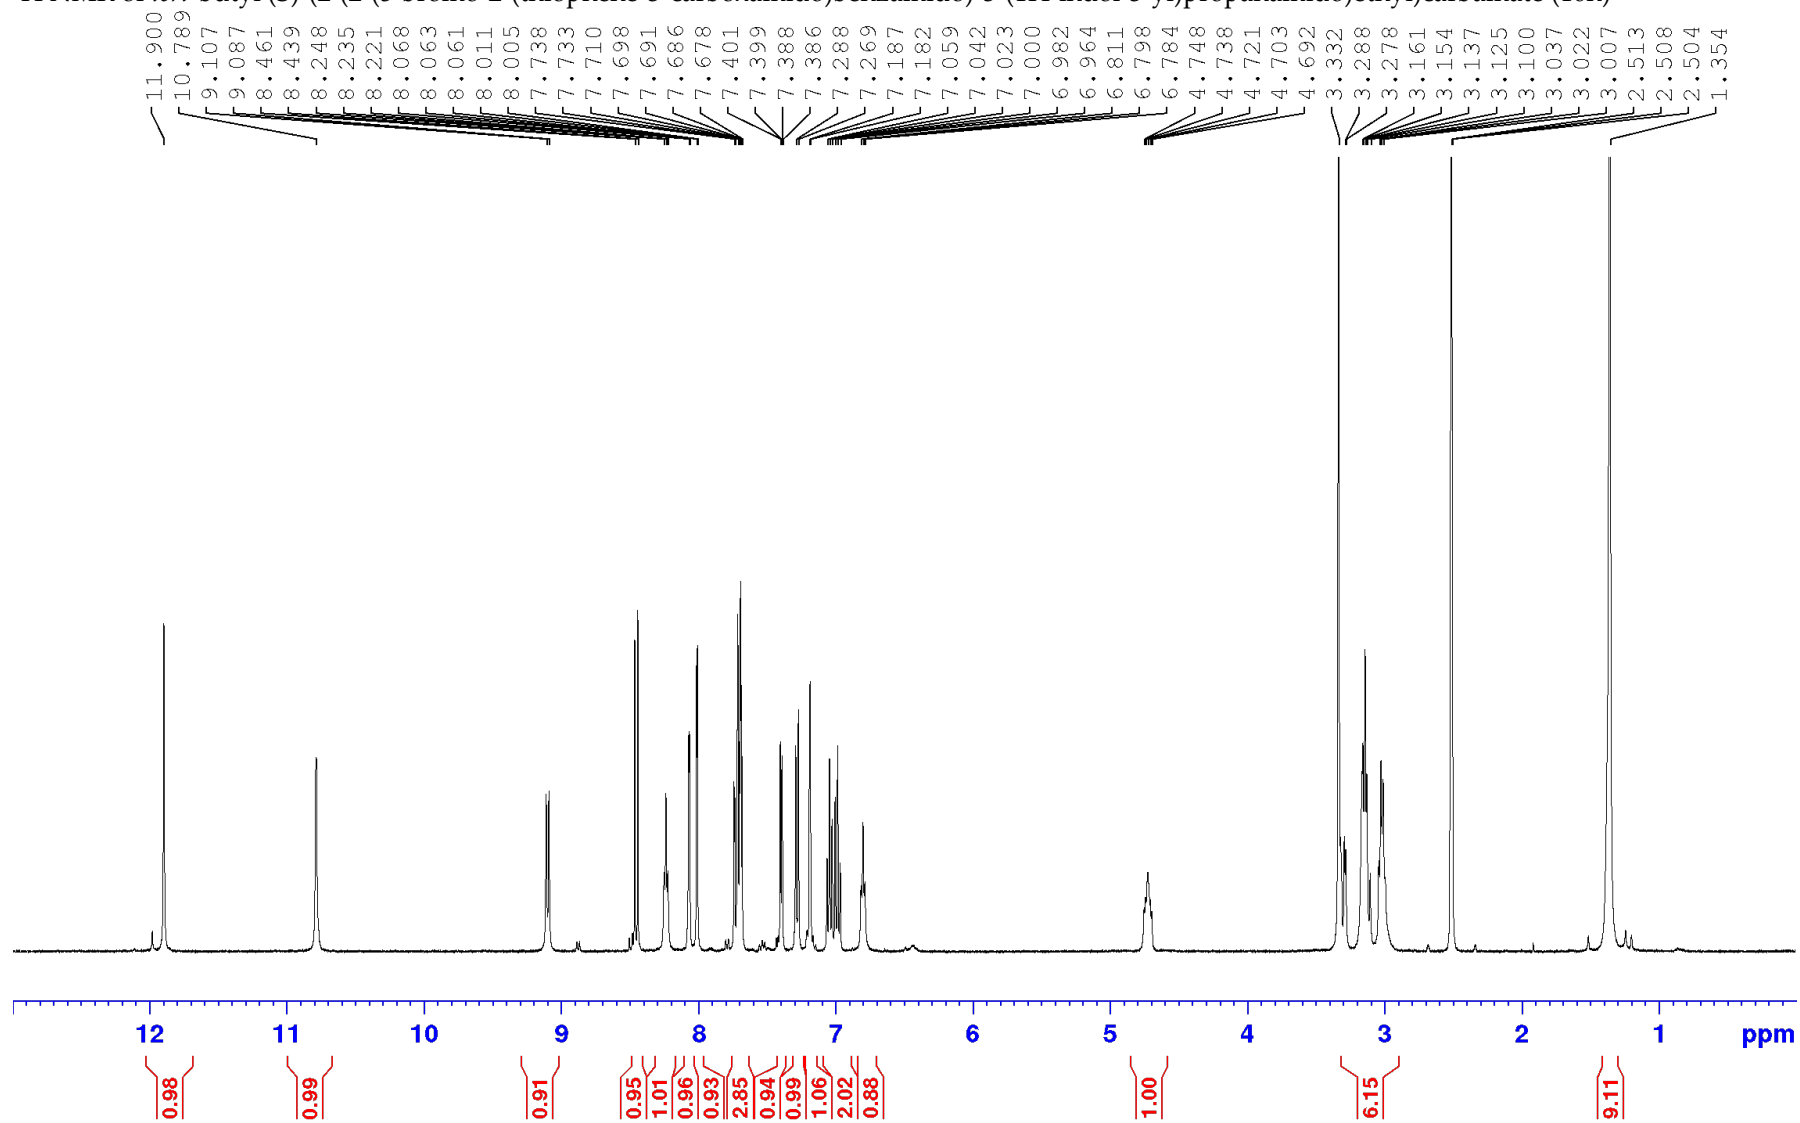

$^{13}\text{C}$  NMR of *tert*-butyl (S)-(2-(2-(5-bromo-2-(thiophene-3-carboxamido)benzamido)-3-(1H-indol-3-yl)propanamido)ethyl)carbamate (10h)

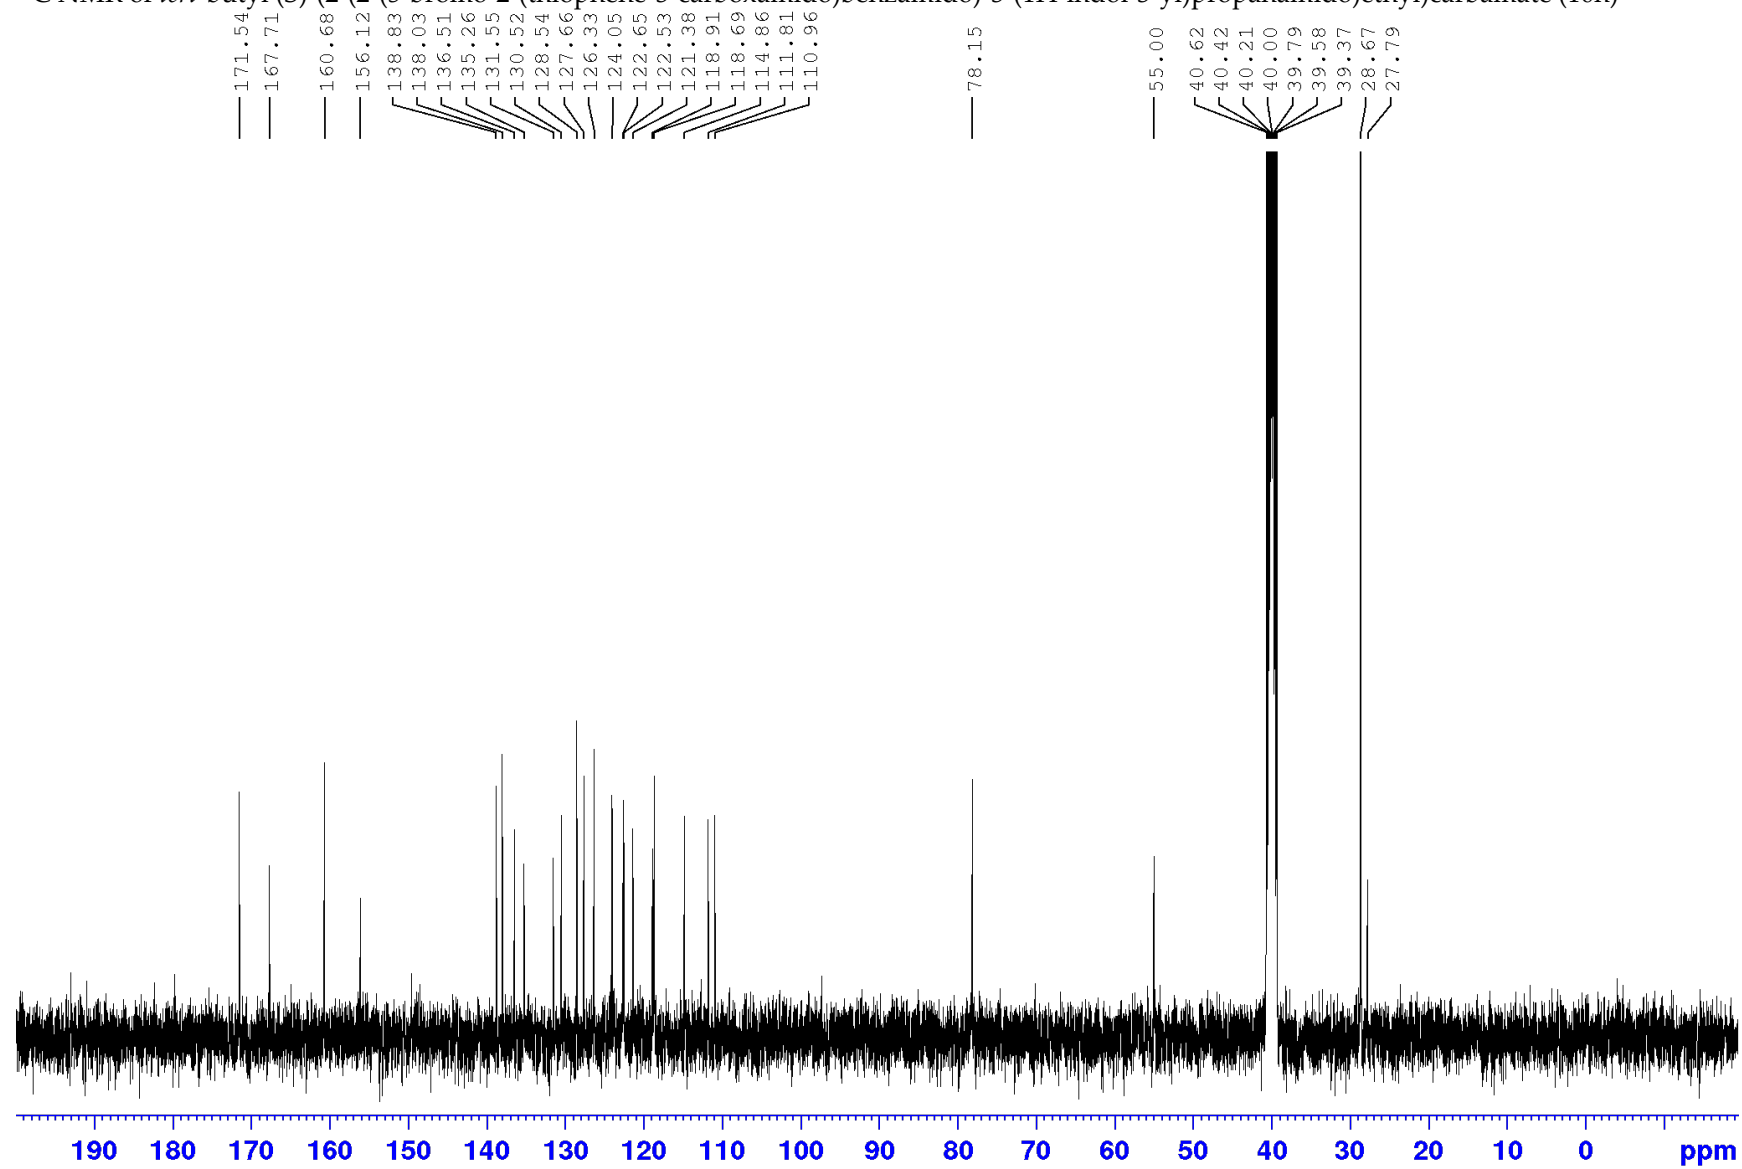

<sup>1</sup>H NMR of *tert*-butyl (S)-(2-(2-(2-([1,1'-biphenyl]-2-carboxamido)-5-bromobenzamido)-3-(1H-indol-3-yl)propanamido)ethyl)carbamate (10i)

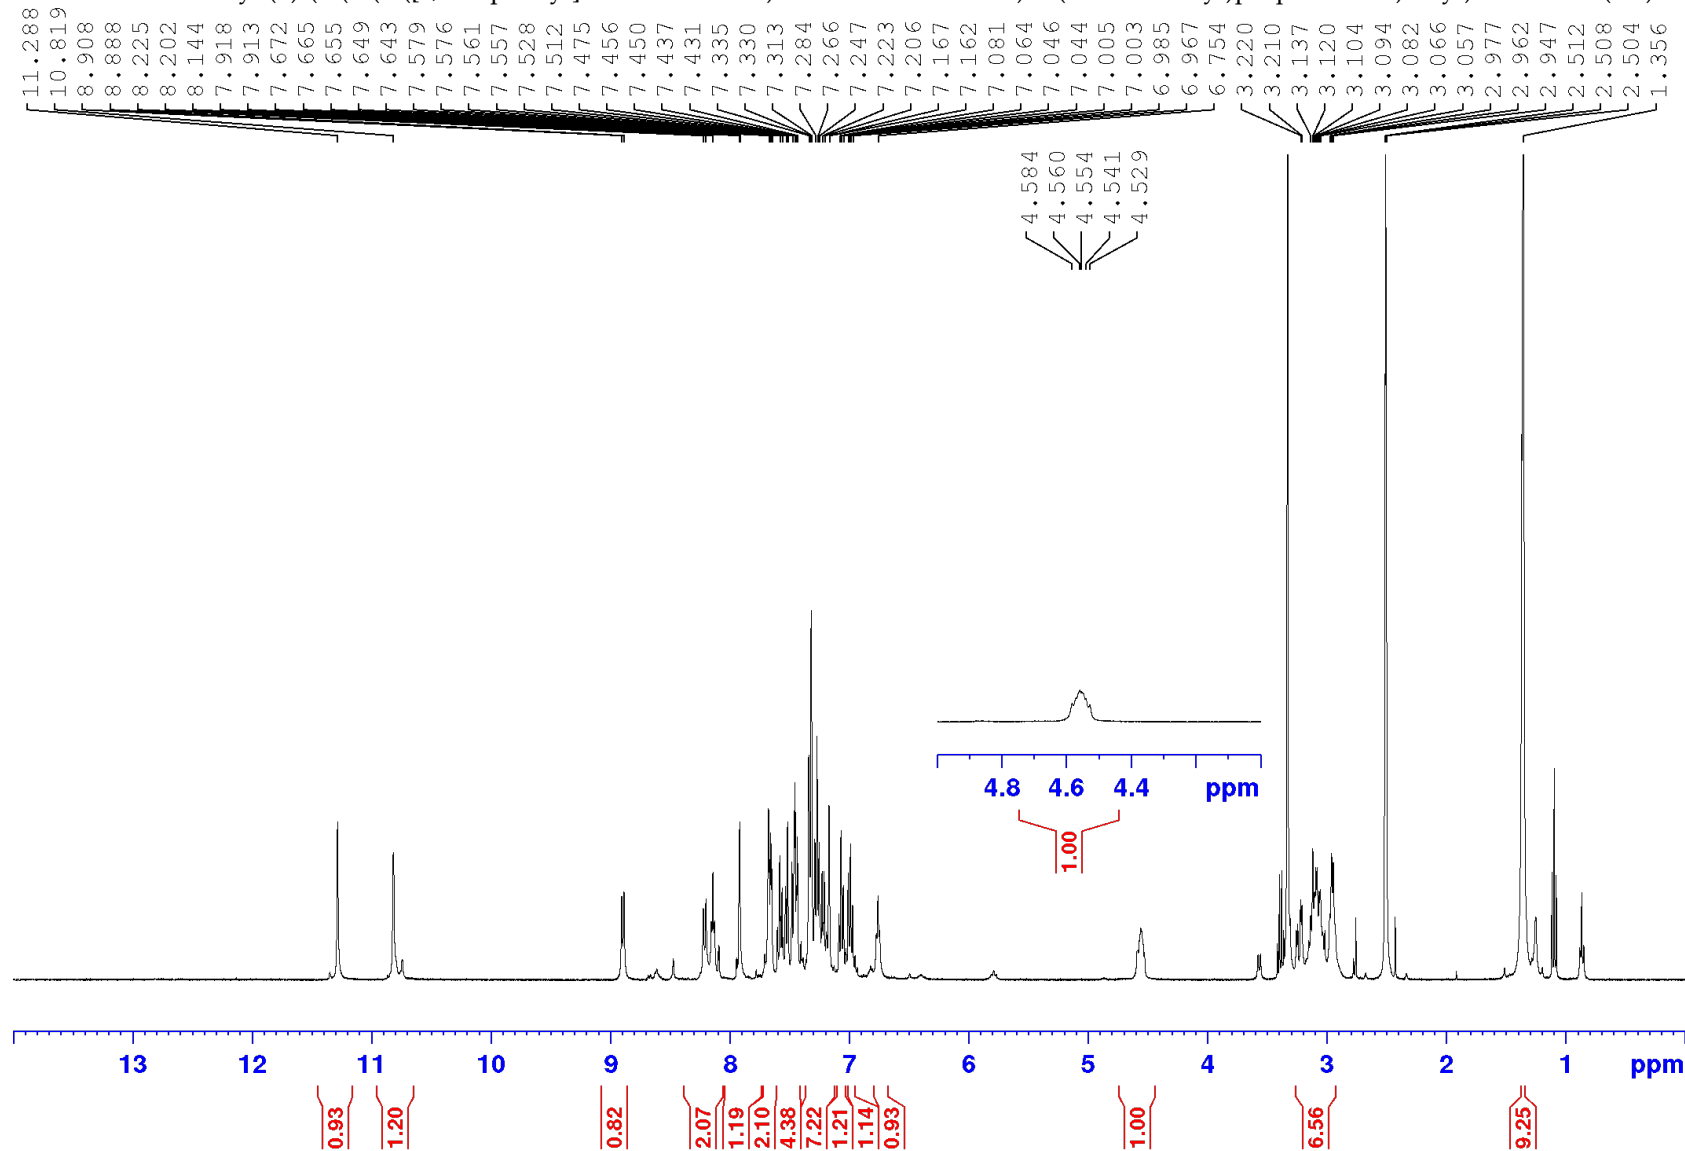

$^{13}\text{C}$  NMR of *tert*-butyl (S)-(2-(2-(2-([1,1'-biphenyl]-2-carboxamido)-5-bromobenzamido)-3-(1H-indol-3-yl)propanamido)ethyl)carbamate (10i)

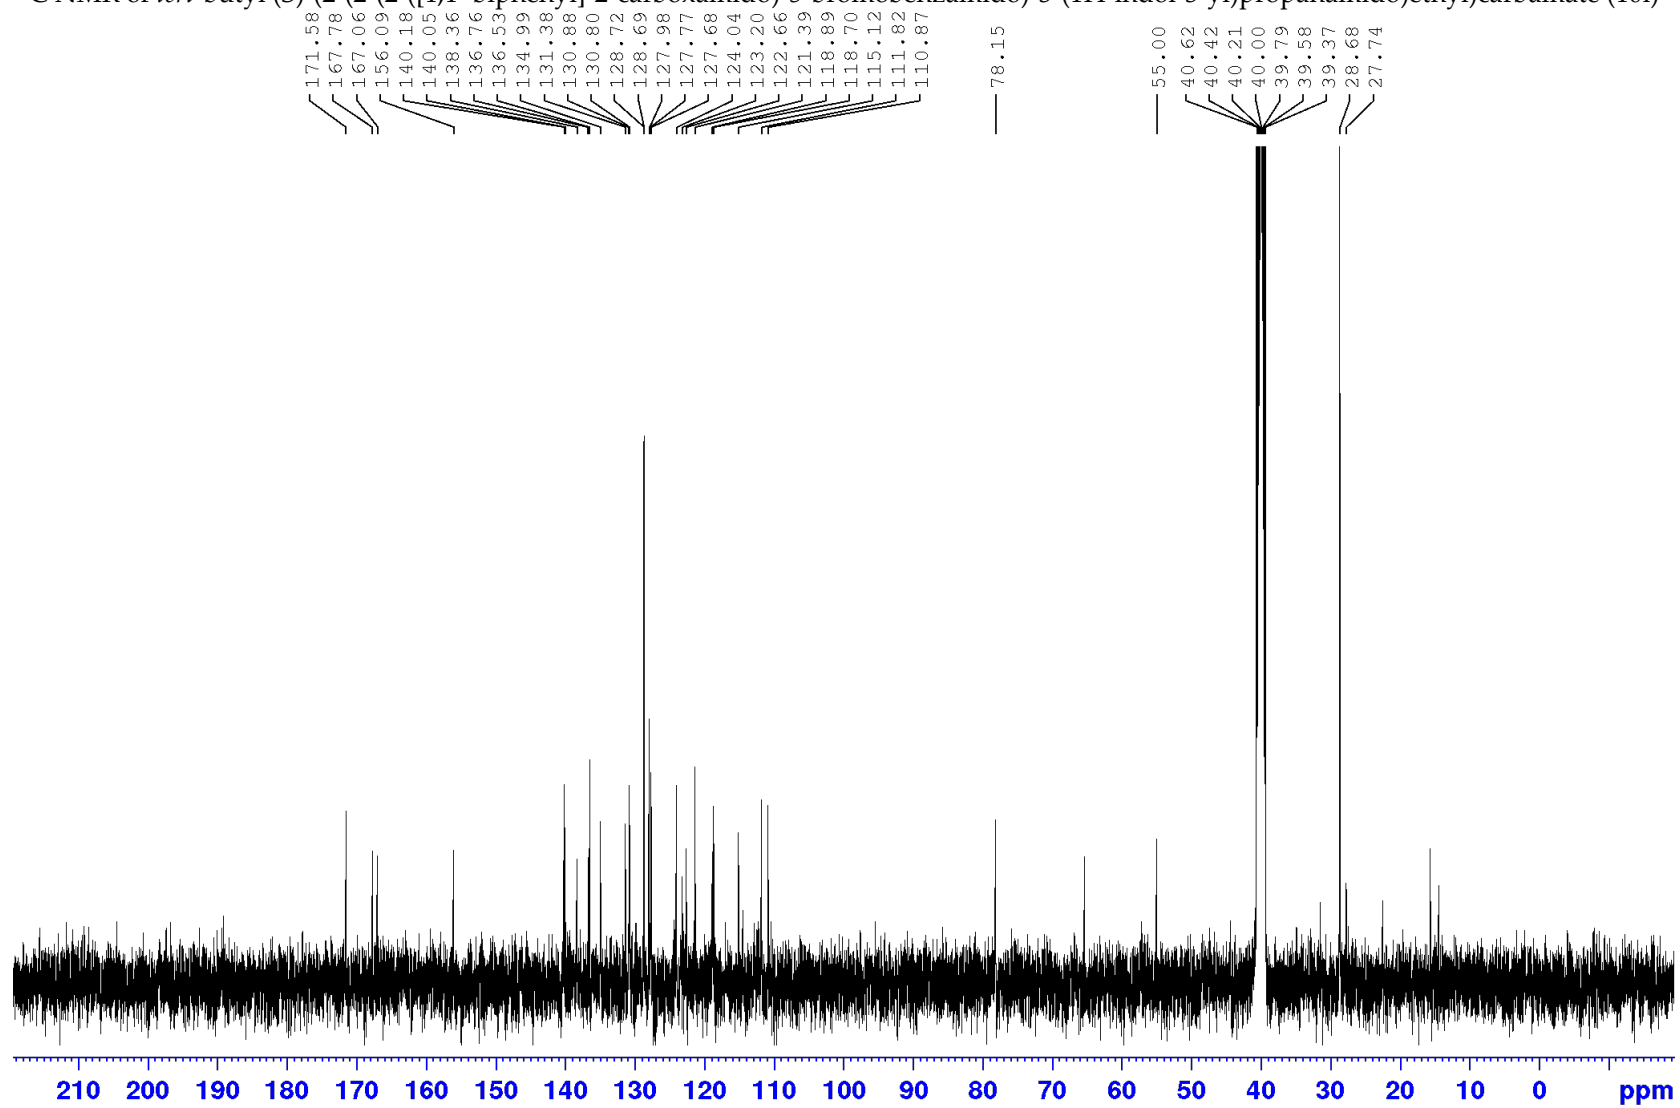

<sup>1</sup>H NMR of *tert*-butyl (S)-(2-(2-(2-([1,1'-biphenyl]-3-carboxamido)-5-bromobenzamido)-3-(1*H*-indol-3-yl)propanamido)ethyl)carbamate (10j)

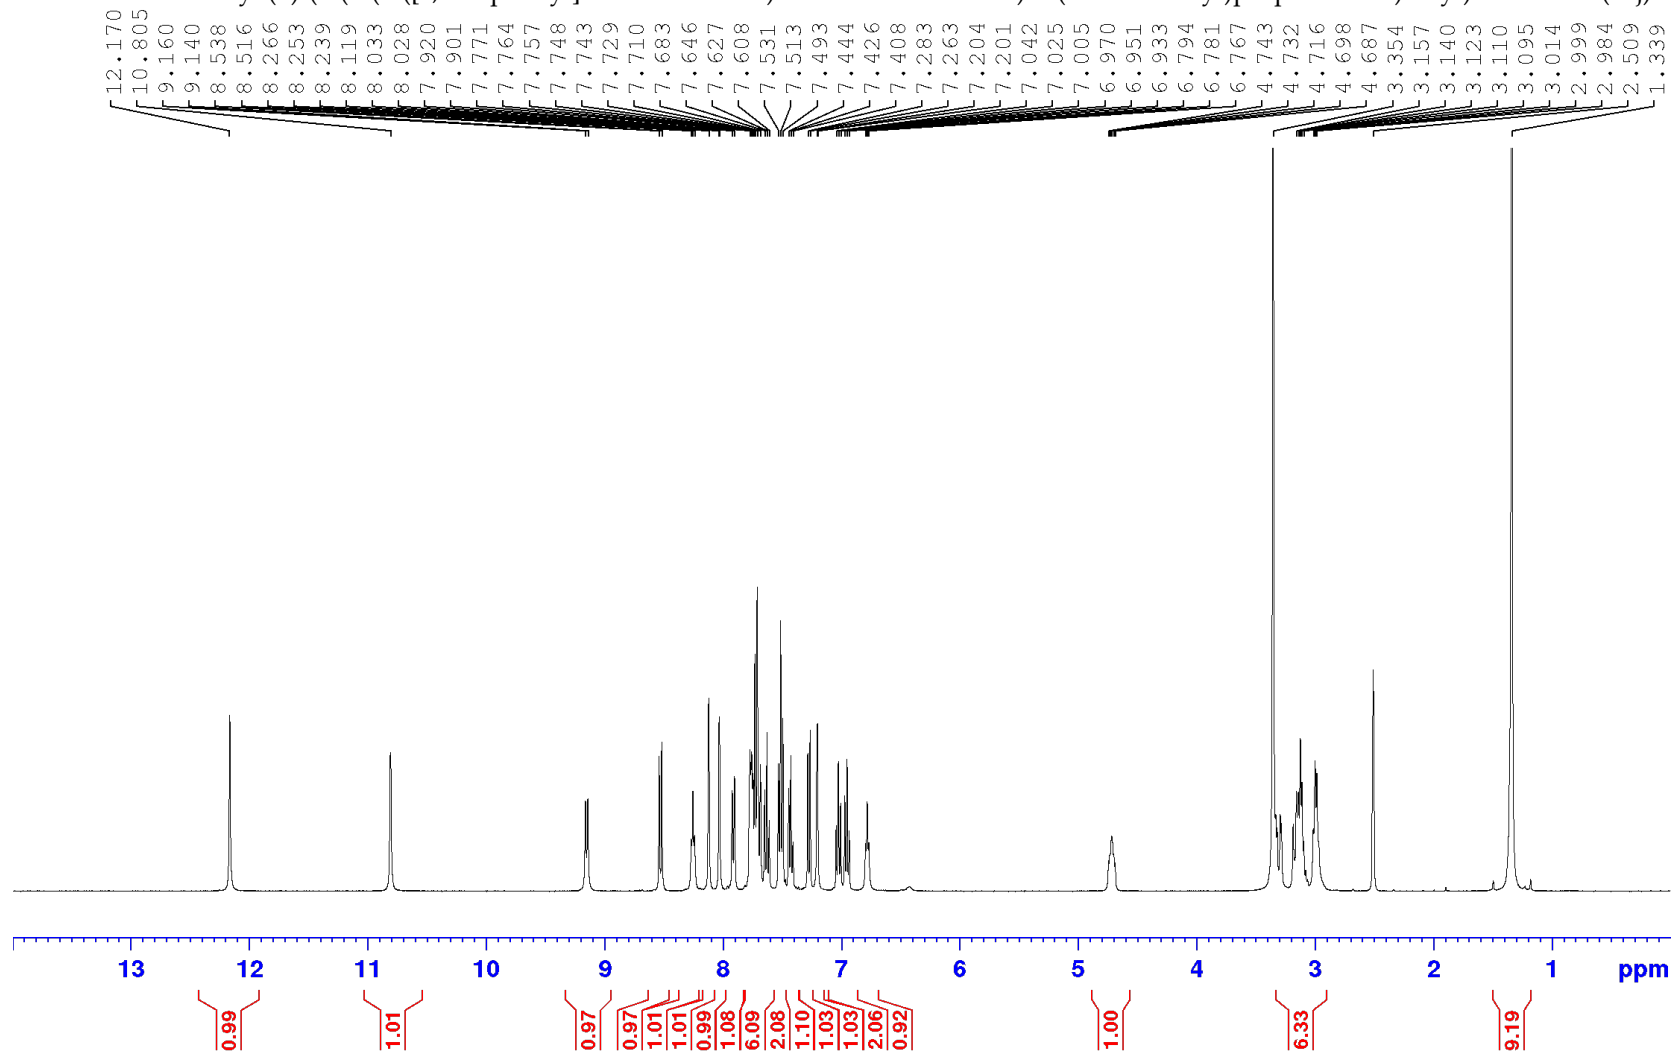

$^{13}\text{C}$  NMR of *tert*-butyl (S)-(2-(2-(2-([1,1'-biphenyl]-3-carboxamido)-5-bromobenzamido)-3-(1*H*-indol-3-yl)propanamido)ethyl)carbamate (10j)

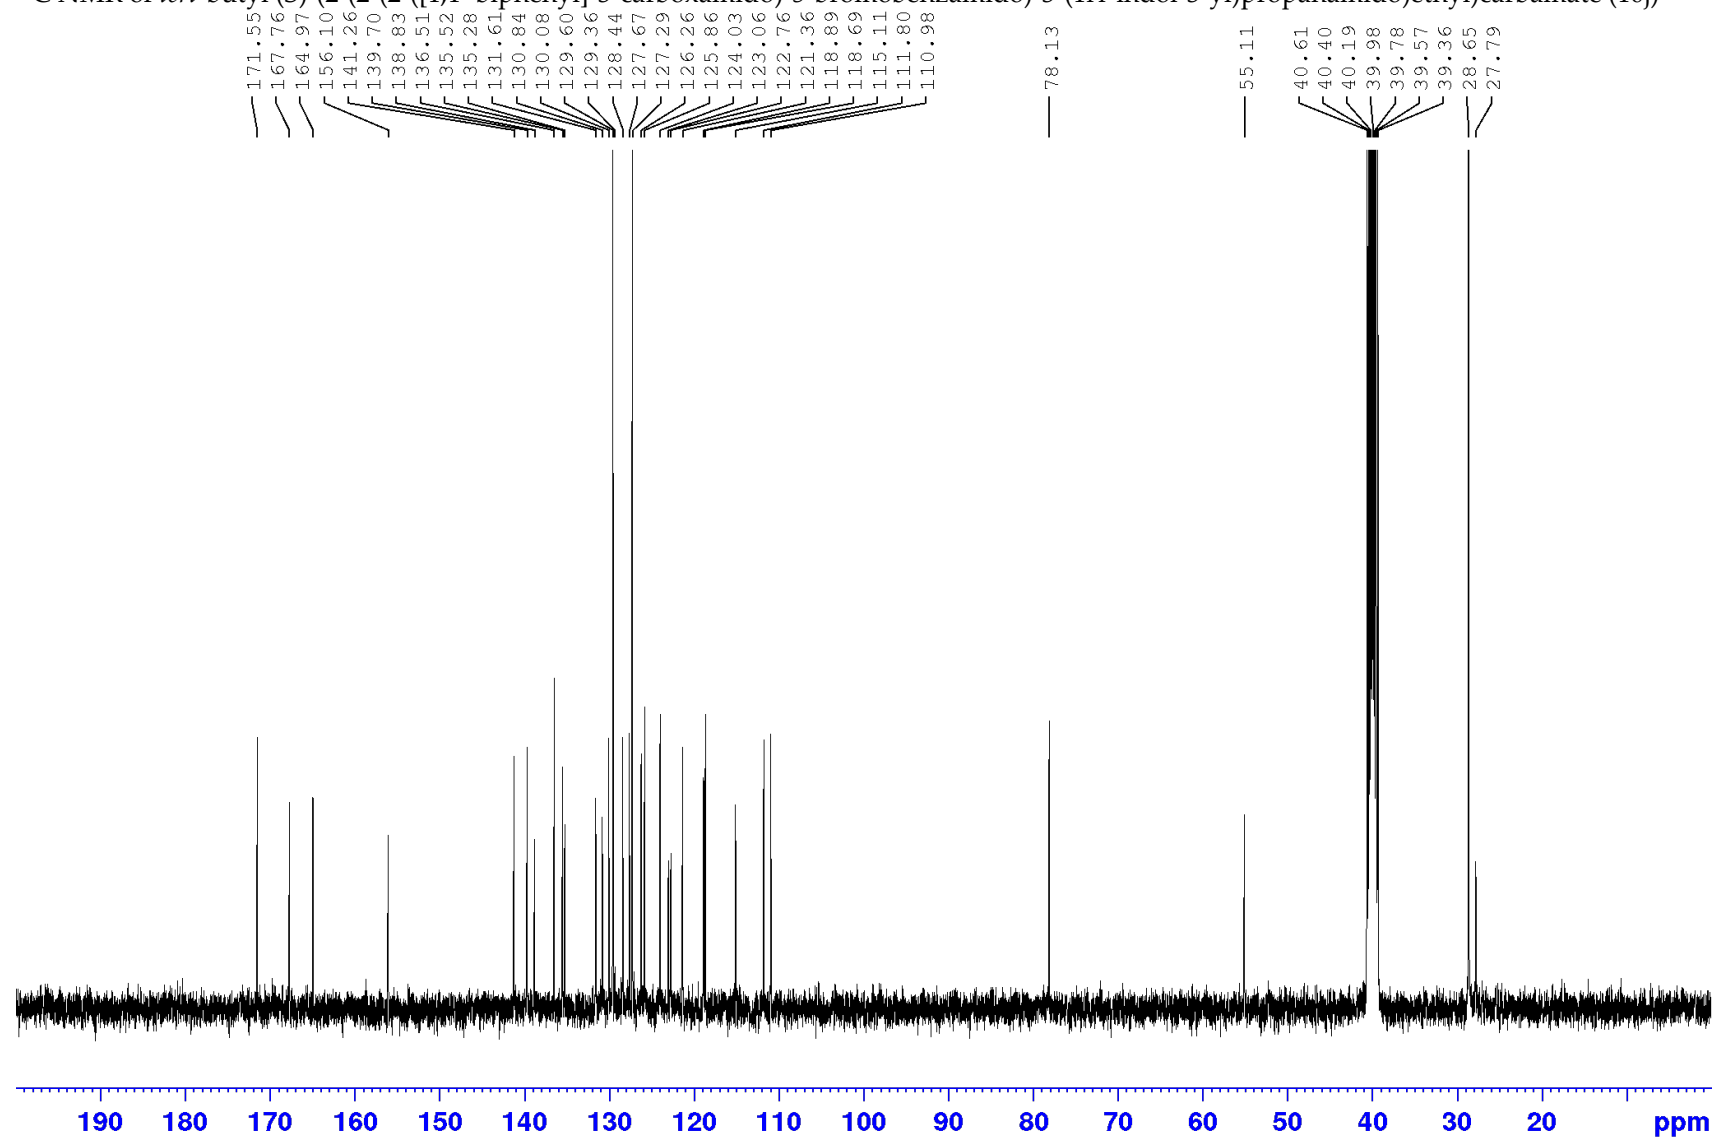

$^1\text{H}$  NMR of *tert*-butyl (S)-(2-(2-(2-([1,1'-biphenyl]-4-carboxamido)-5-bromobenzamido)-3-(1*H*-indol-3-yl)propanamido)ethyl)carbamate (10k)

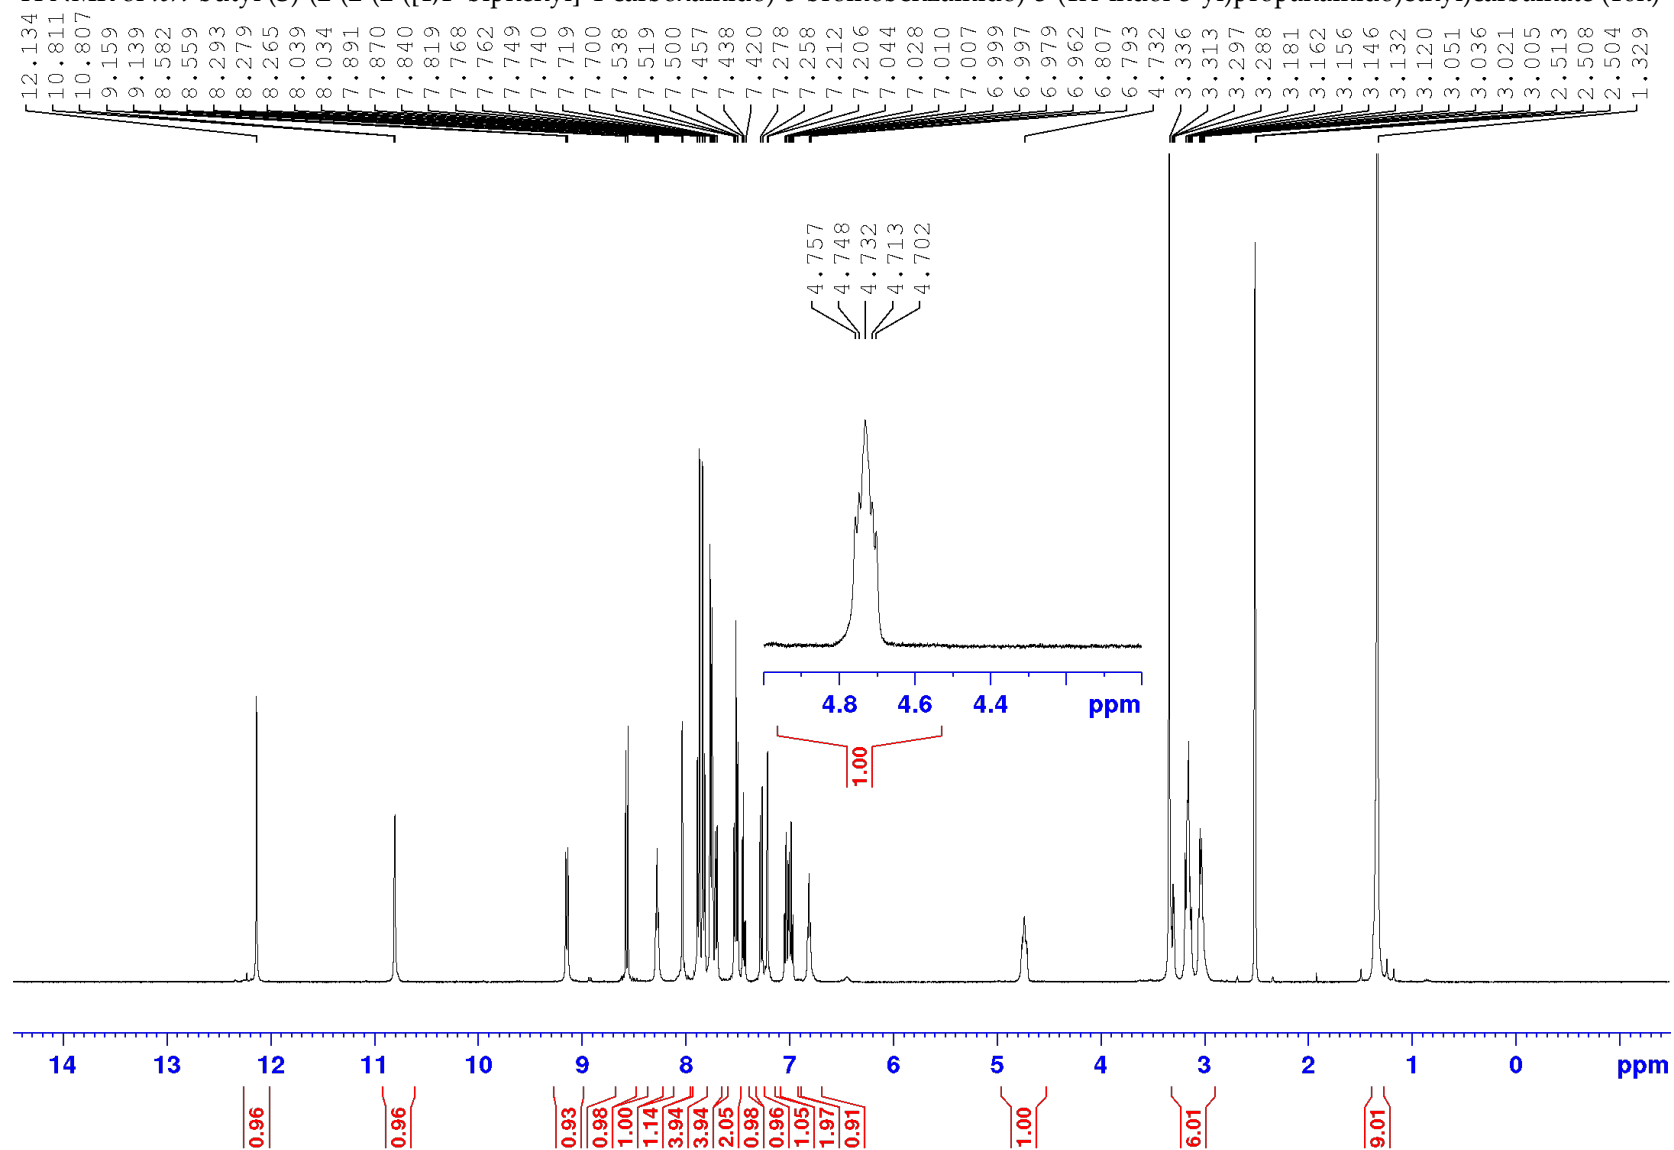

$^{13}\text{C}$  NMR of *tert*-butyl (S)-(2-(2-(2-([1,1'-biphenyl]-4-carboxamido)-5-bromobenzamido)-3-(1*H*-indol-3-yl)propanamido)ethyl)carbamate (10k)

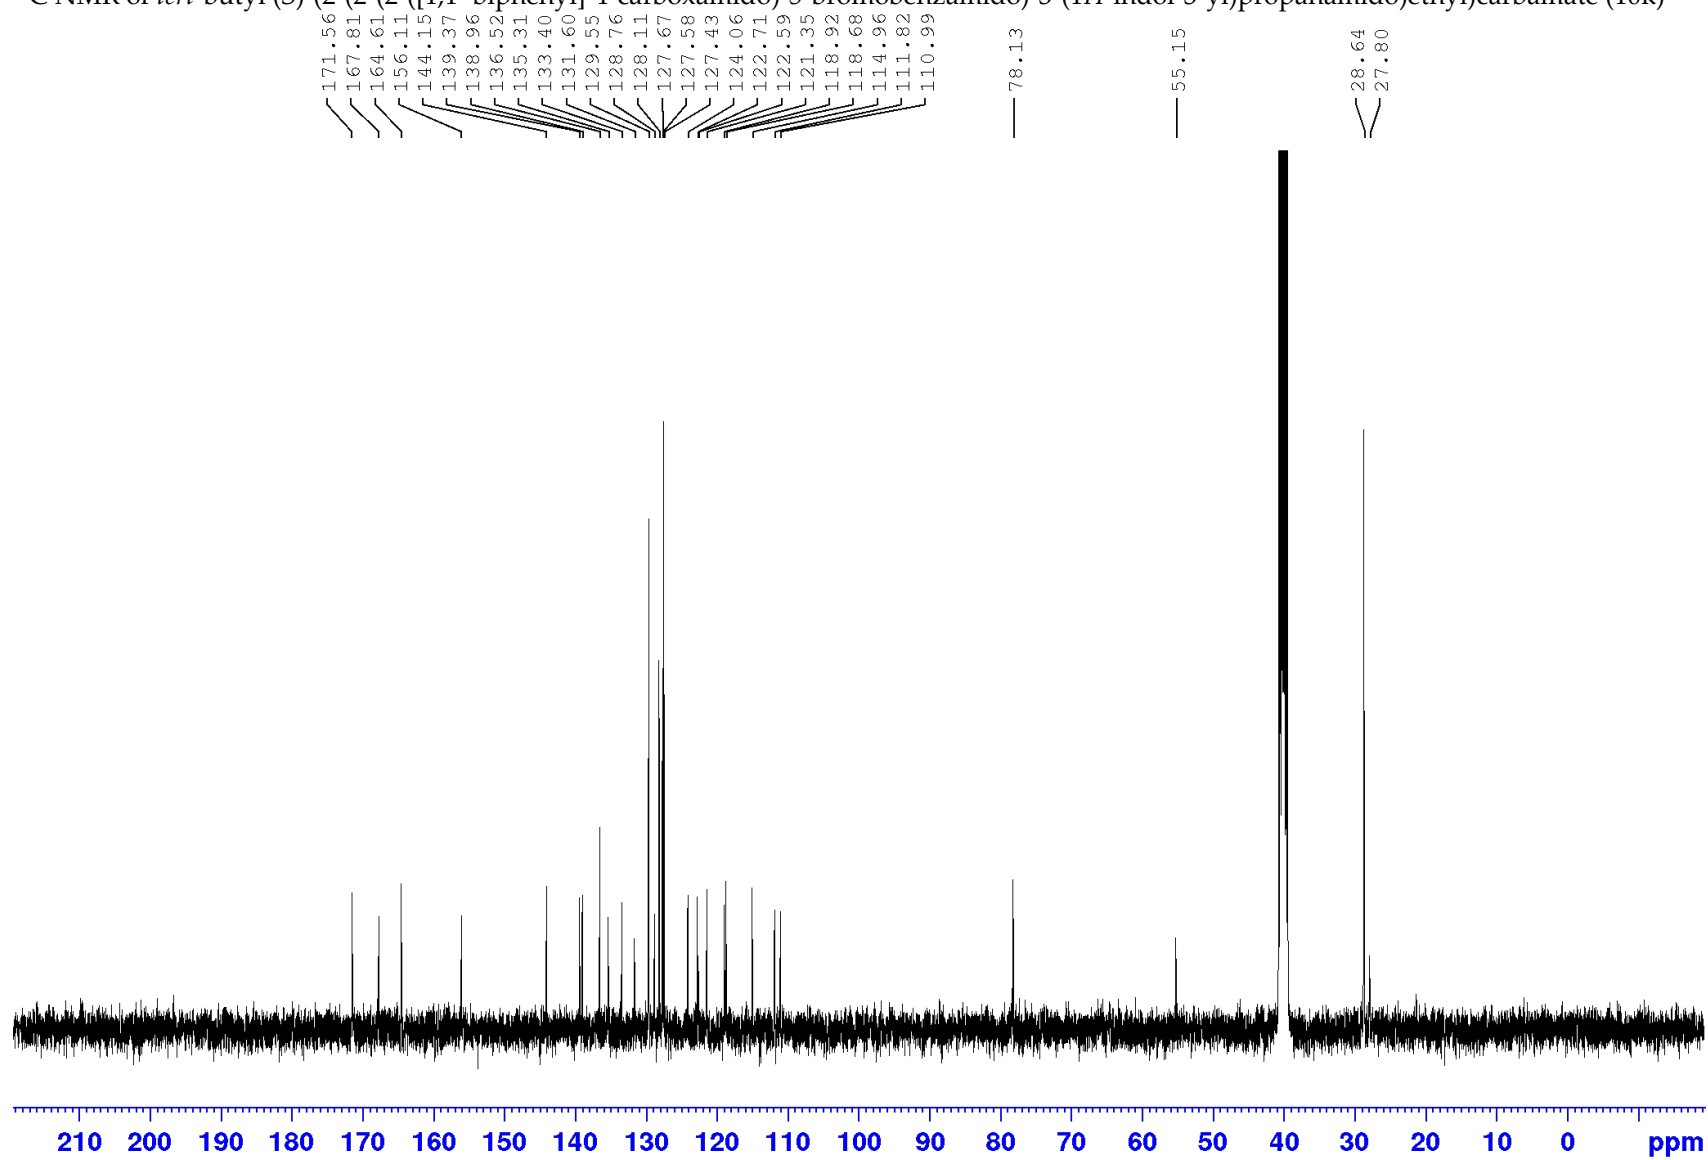



<sup>1</sup>H NMR spectrum (CDCl<sub>3</sub>) of compound 10. The x-axis represents the chemical shift in ppm, ranging from 0 to 14. The spectrum shows several peaks, with integration values provided below the baseline. A list of peak chemical shifts is provided at the top of the spectrum.

Chemical shifts (ppm): 12.242, 10.806, 9.184, 9.164, 8.575, 8.553, 8.441, 8.200, 8.187, 8.173, 8.073, 8.065, 8.046, 8.041, 8.011, 7.862, 7.859, 7.841, 7.837, 7.784, 7.778, 7.761, 7.756, 7.721, 7.702, 7.675, 7.655, 7.634, 7.619, 7.274, 7.255, 7.222, 7.217, 7.036, 7.019, 6.997, 6.975, 6.958, 6.746, 6.733, 6.719, 4.756, 4.745, 4.731, 4.726, 4.712, 4.700, 4.745, 4.731, 4.726, 4.712, 4.700, 3.338, 3.088, 3.071, 2.911, 2.896, 2.880, 2.508, 1.328.

Integration values (from left to right): 0.99, 0.98, 1.01, 1.02, 1.02, 1.06, 4.06, 1.06, 0.90, 3.09, 2.01, 1.99, 0.89, 1.00, 3.82, 1.98, 2.08, 9.08.

Inset: A zoomed-in view of the aromatic region (4.4 to 4.8 ppm) showing a peak with an integration of 1.00.

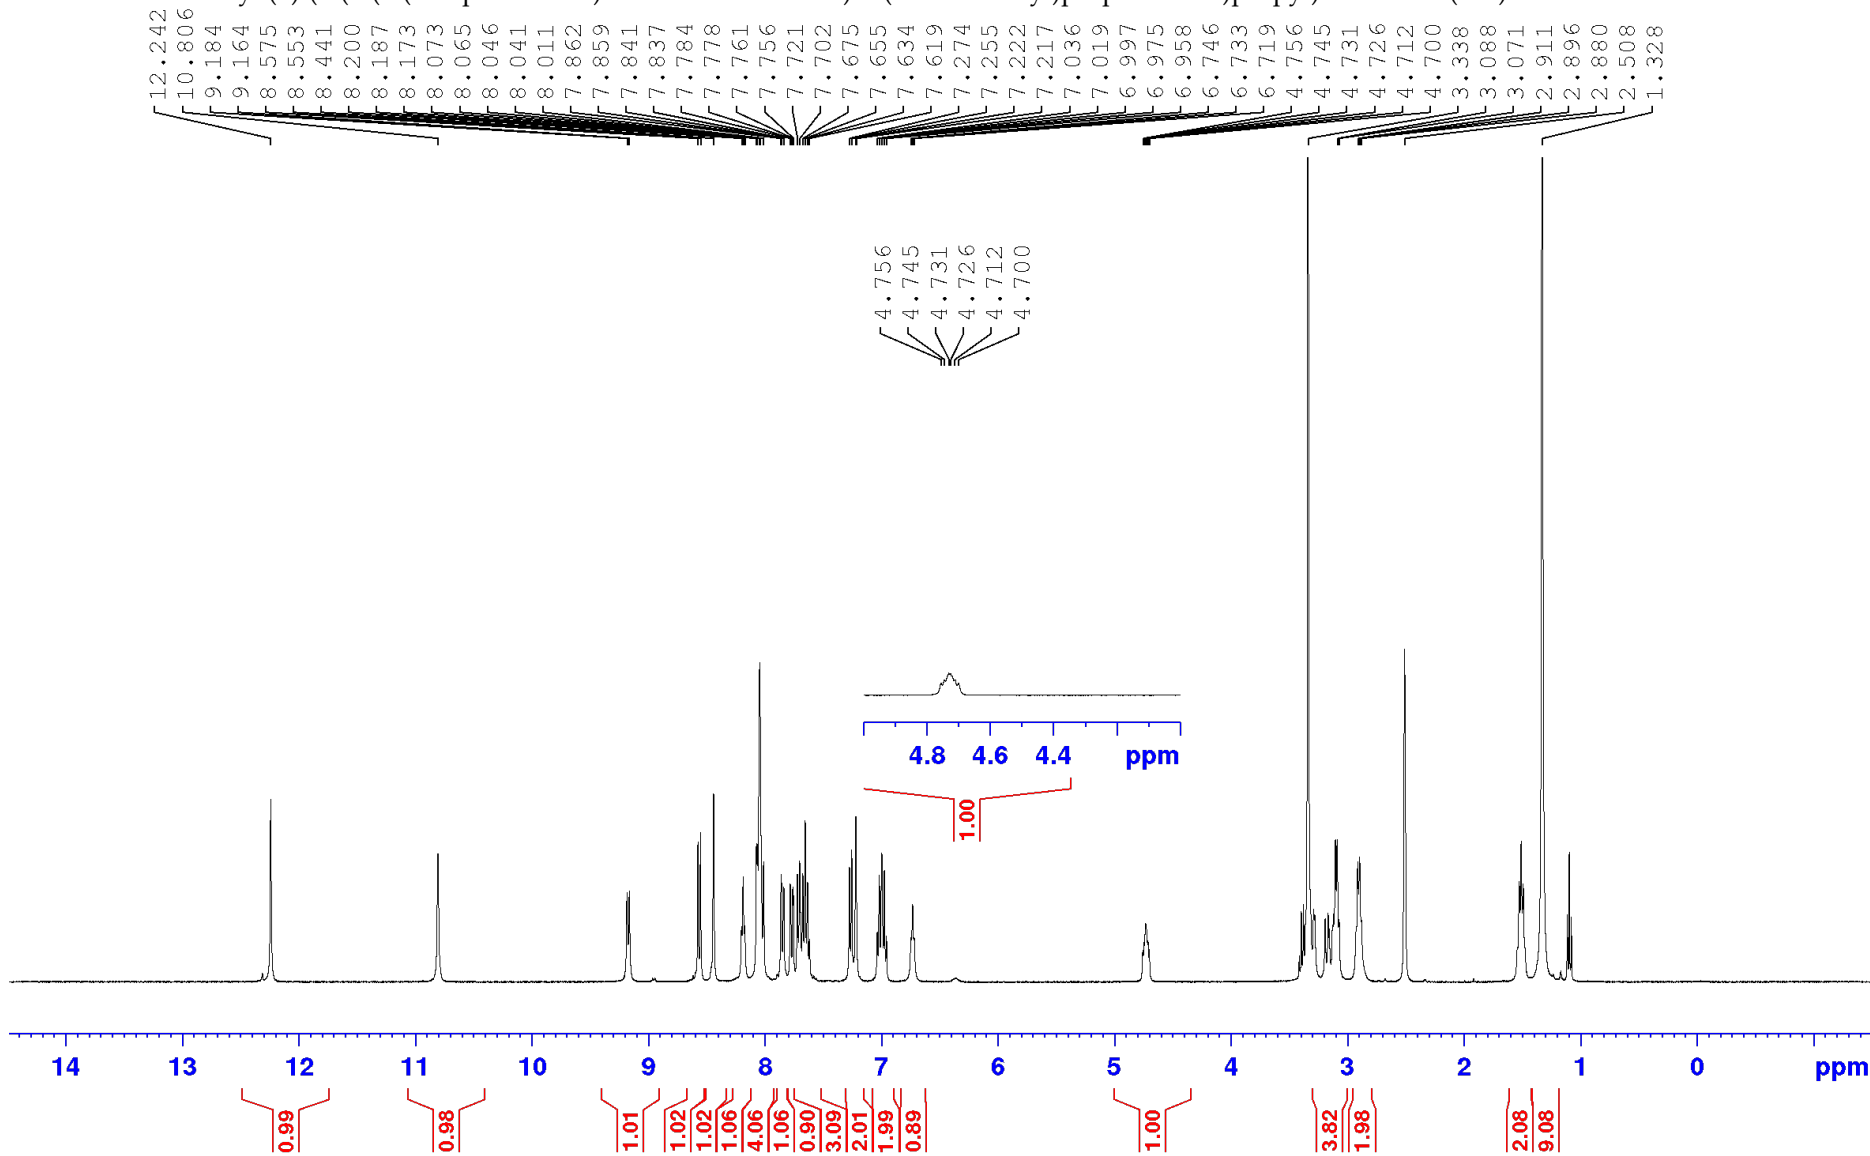

$^{13}\text{C}$  NMR of *tert*-butyl (S)-(3-(2-(2-(2-naphthamido)-5-bromobenzamido)-3-(1H-indol-3-yl)propanamido)propyl)carbamate (11a)

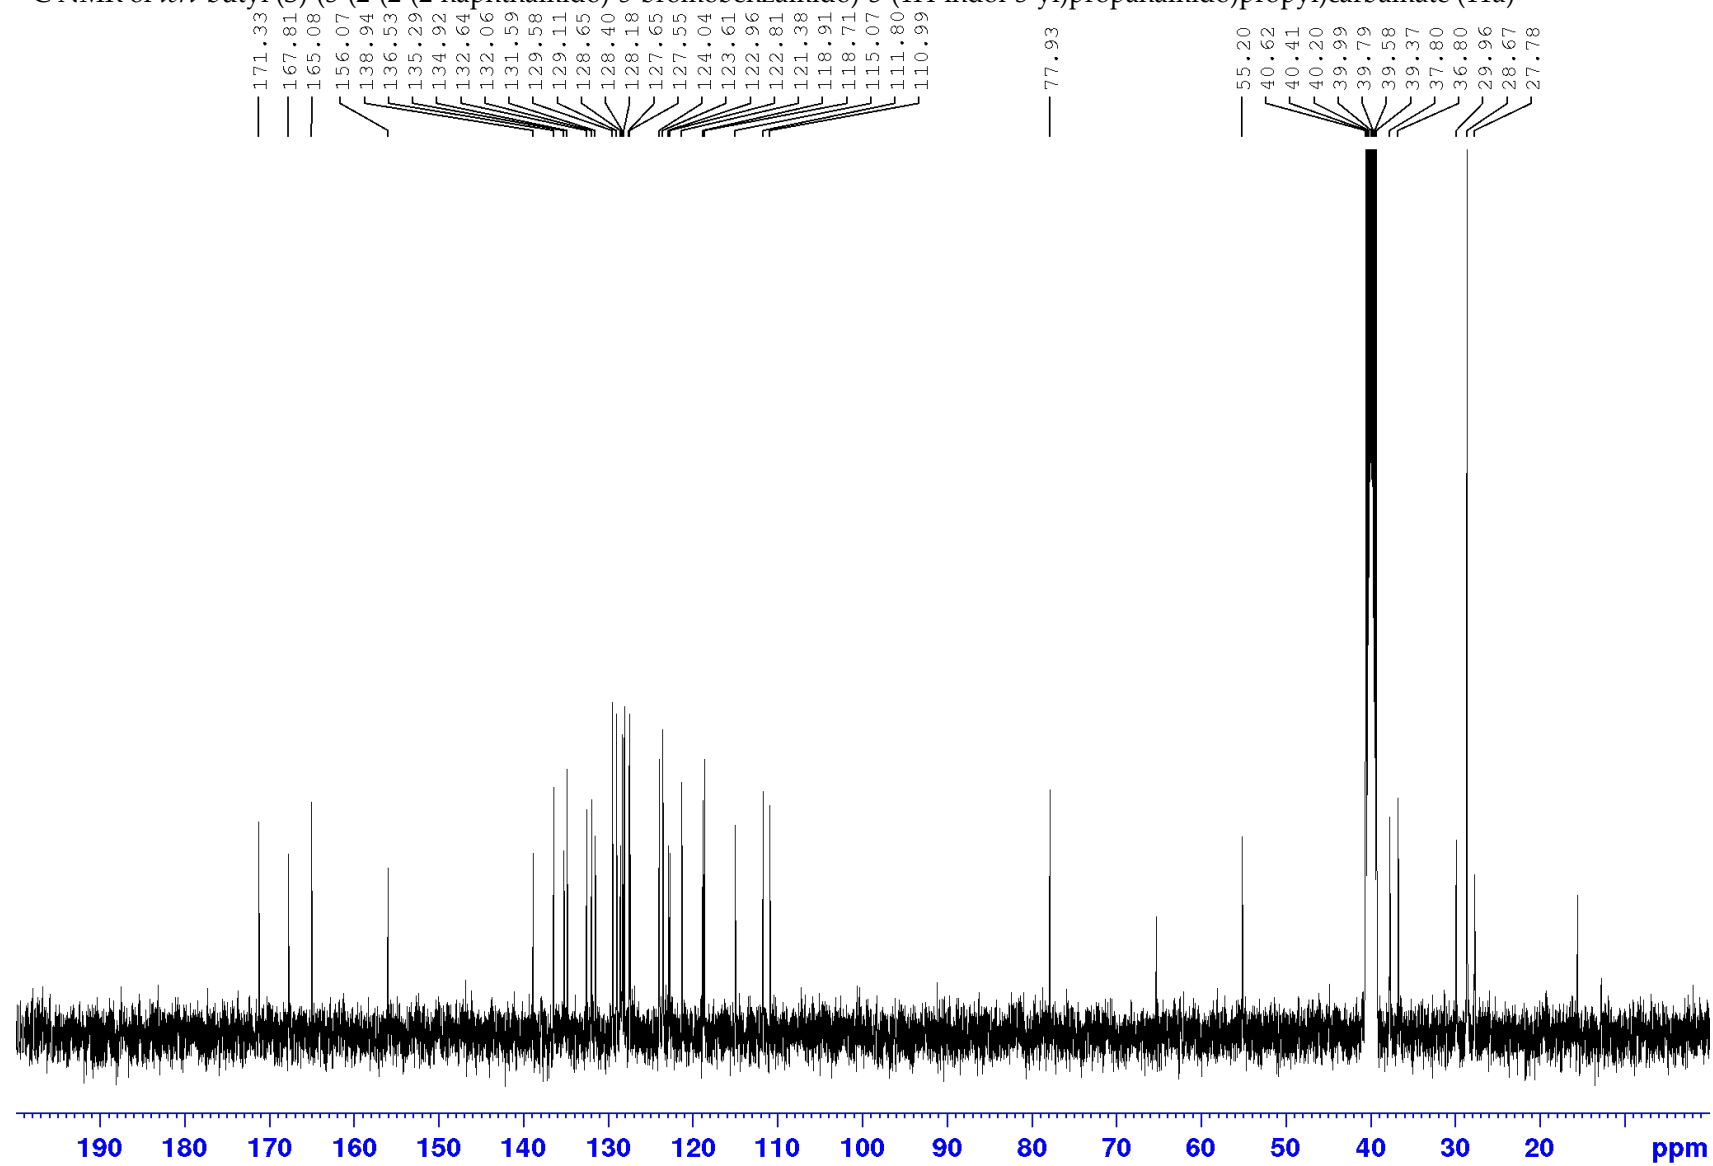

$^1\text{H}$  NMR of *tert*-butyl (S)-(3-(2-(5-bromo-2-(2-(naphthalen-1-yl)acetamido)benzamido)-3-(1*H*-indol-3-yl)propanamido)propyl)carbamate (11b)

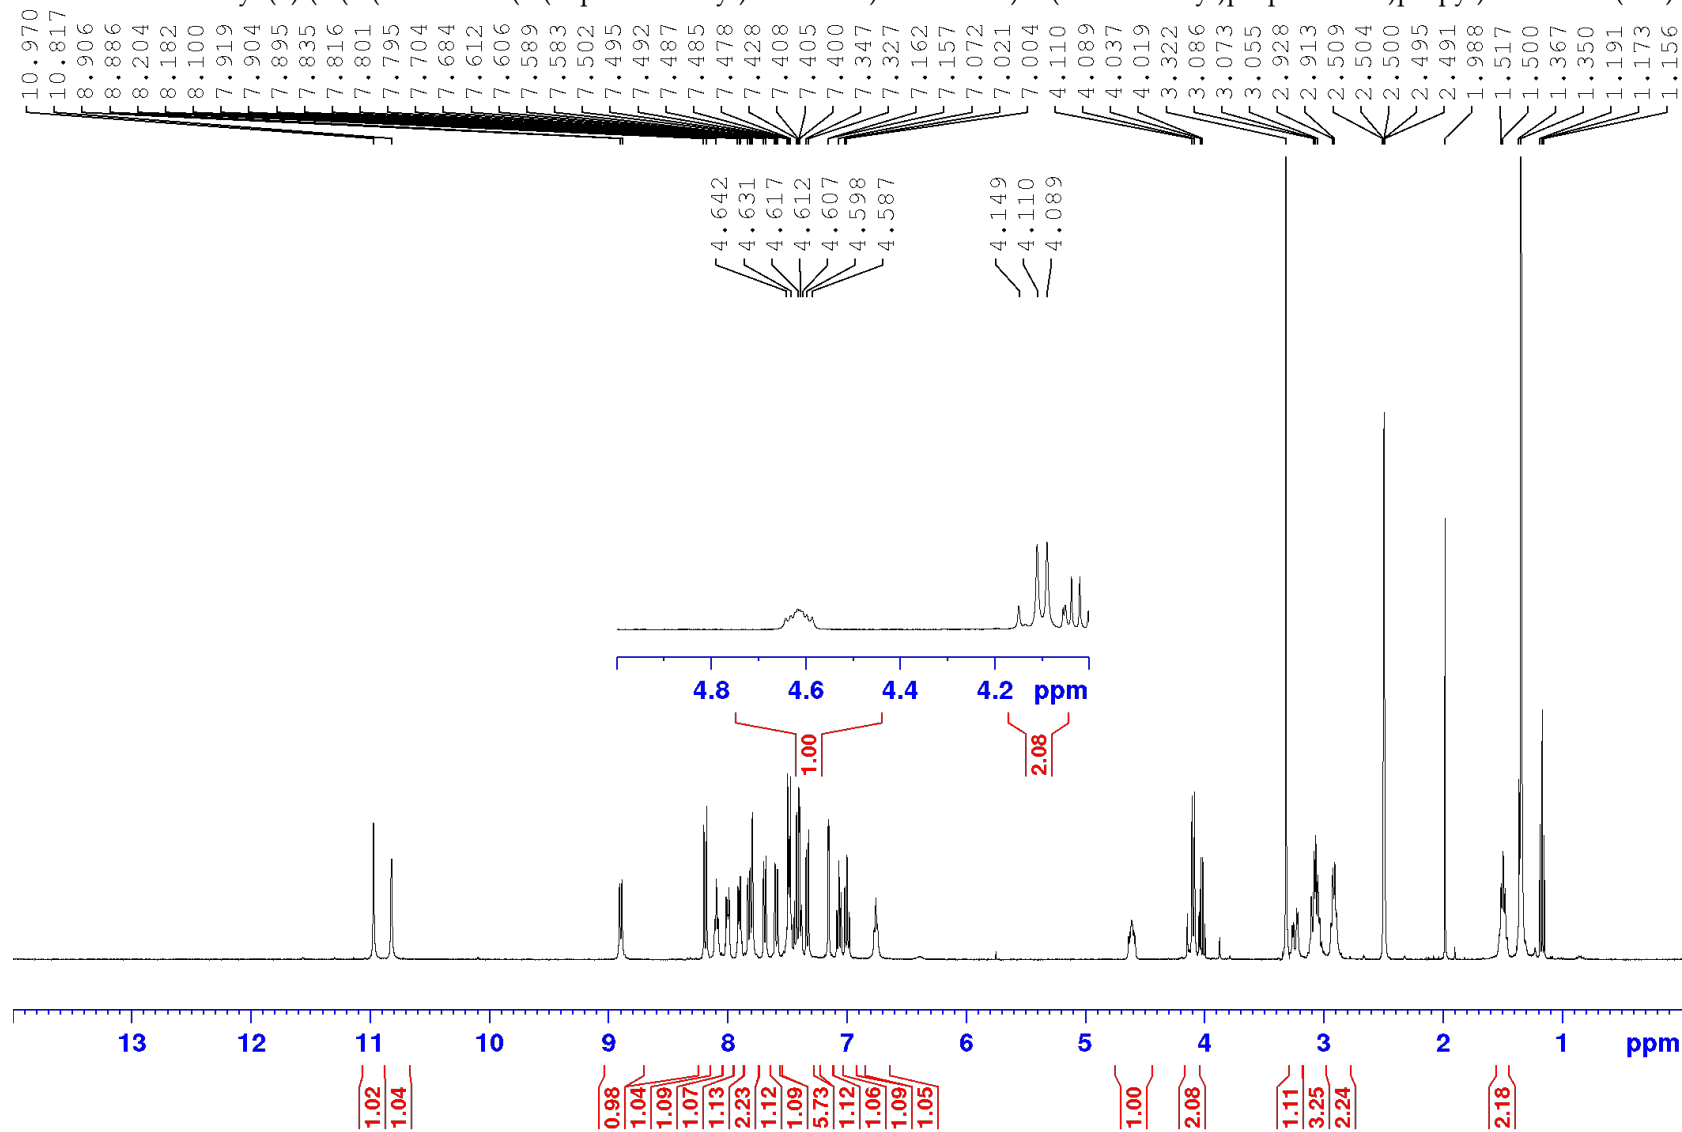

$^{13}\text{C}$  NMR of *tert*-butyl (S)-(3-(2-(5-bromo-2-(2-(naphthalen-1-yl)acetamido)benzamido)-3-(1*H*-indol-3-yl)propanamido)propyl)carbamate (11b)

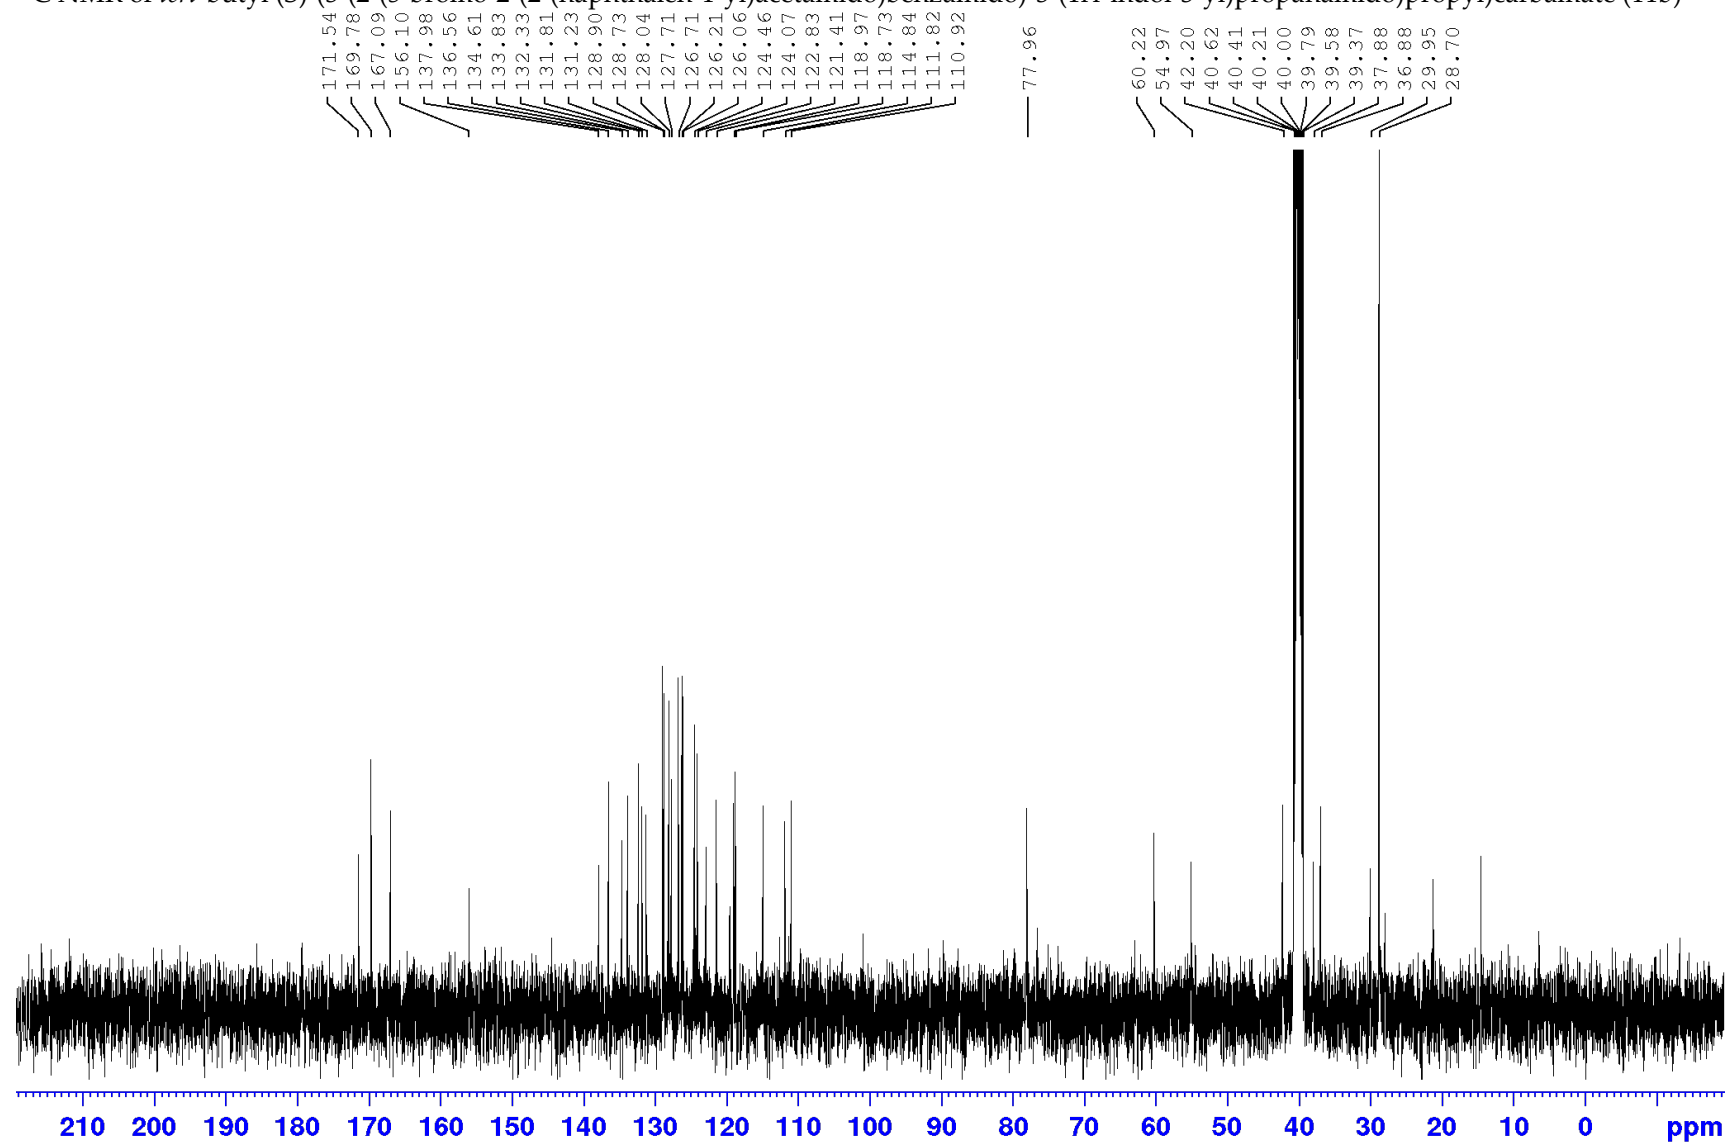

<sup>1</sup>H NMR of *tert*-butyl (S)-(3-(2-(5-bromo-2-(2-methoxy-1-naphthamido)benzamido)-3-(1*H*-indol-3-yl)propanamido)propyl)carbamate (11c)

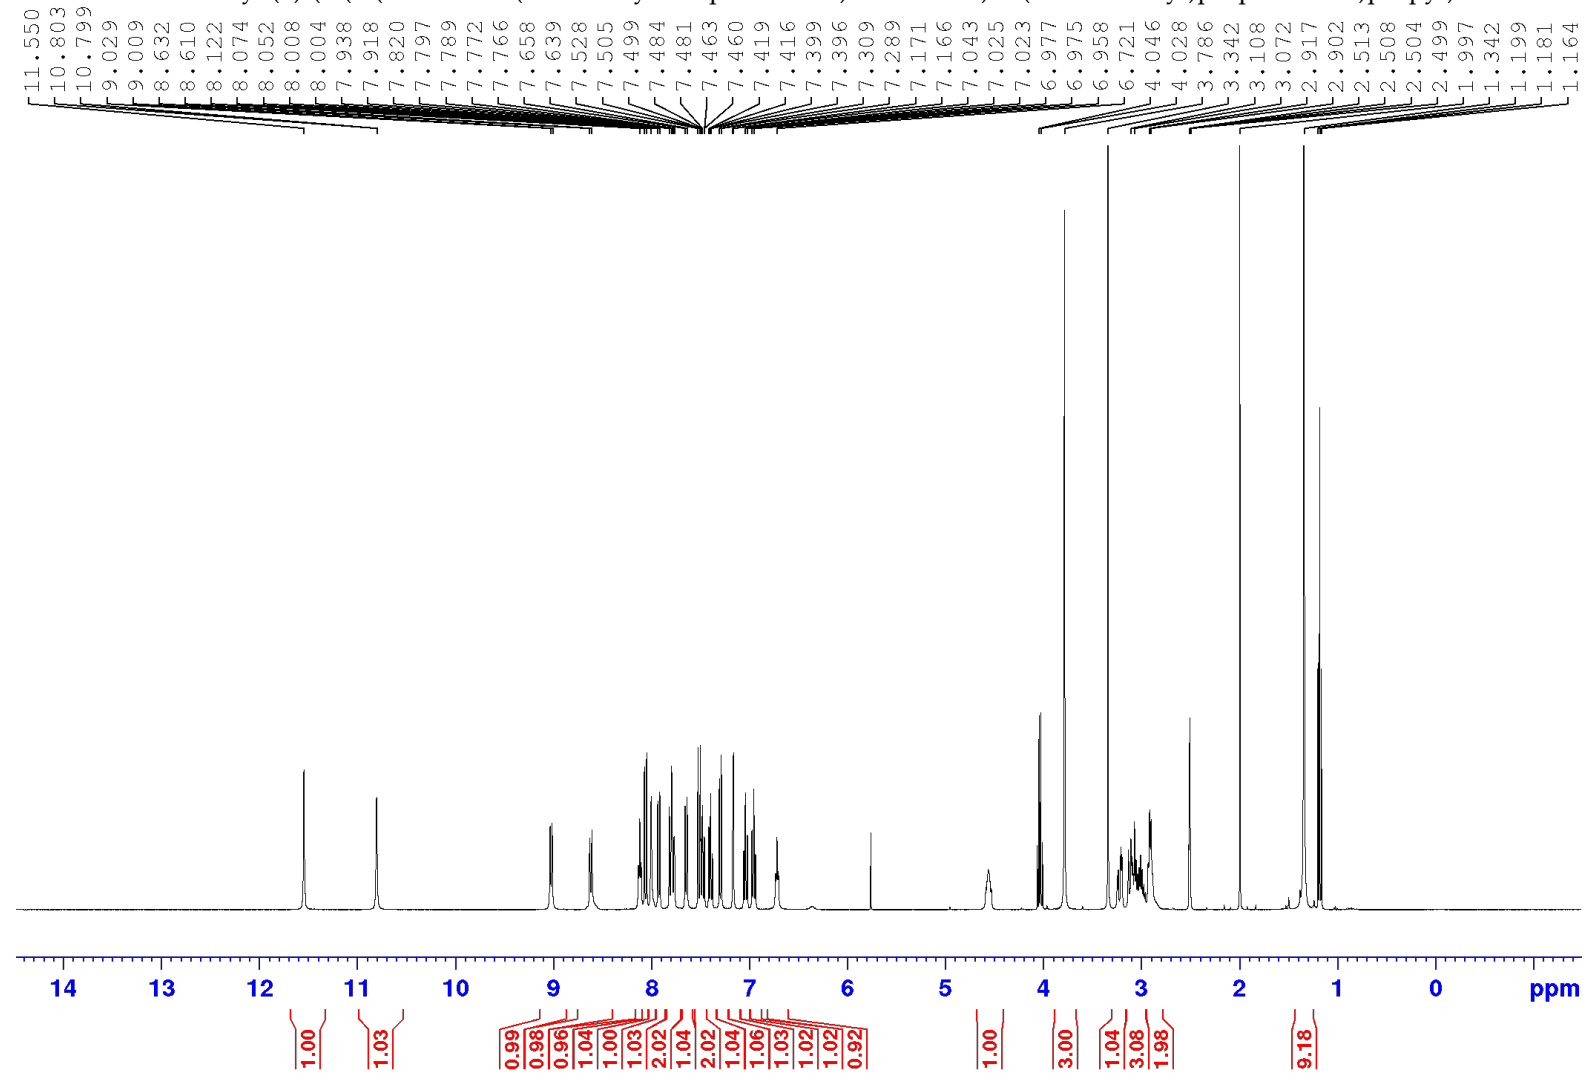

$^{13}\text{C}$  NMR of *tert*-butyl (S)-(3-(2-(5-bromo-2-(2-methoxy-1-naphthamido)benzamido)-3-(1*H*-indol-3-yl)propanamido)propyl)carbamate (11c)

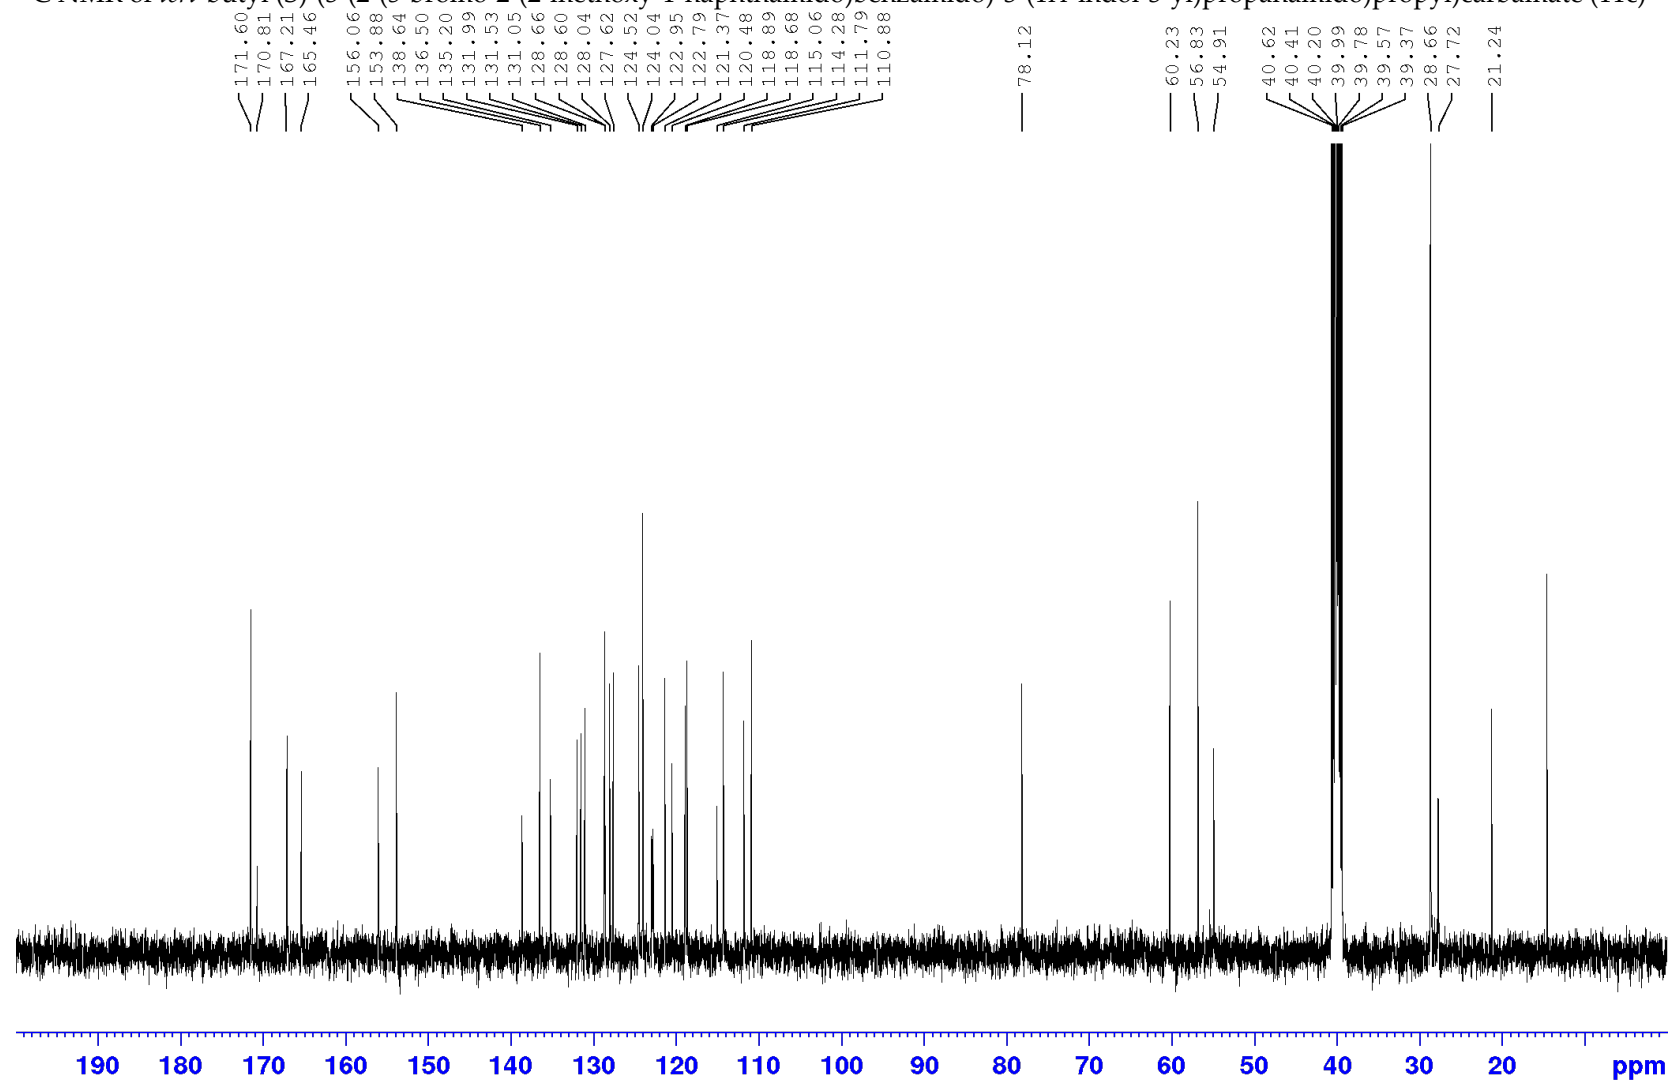

<sup>1</sup>H NMR of *tert*-butyl (S)-(3-(2-(5-bromo-2-(3-methoxy-2-naphthamido)benzamido)-3-(1H-indol-3-yl)propanamido)propyl)carbamate (11d)

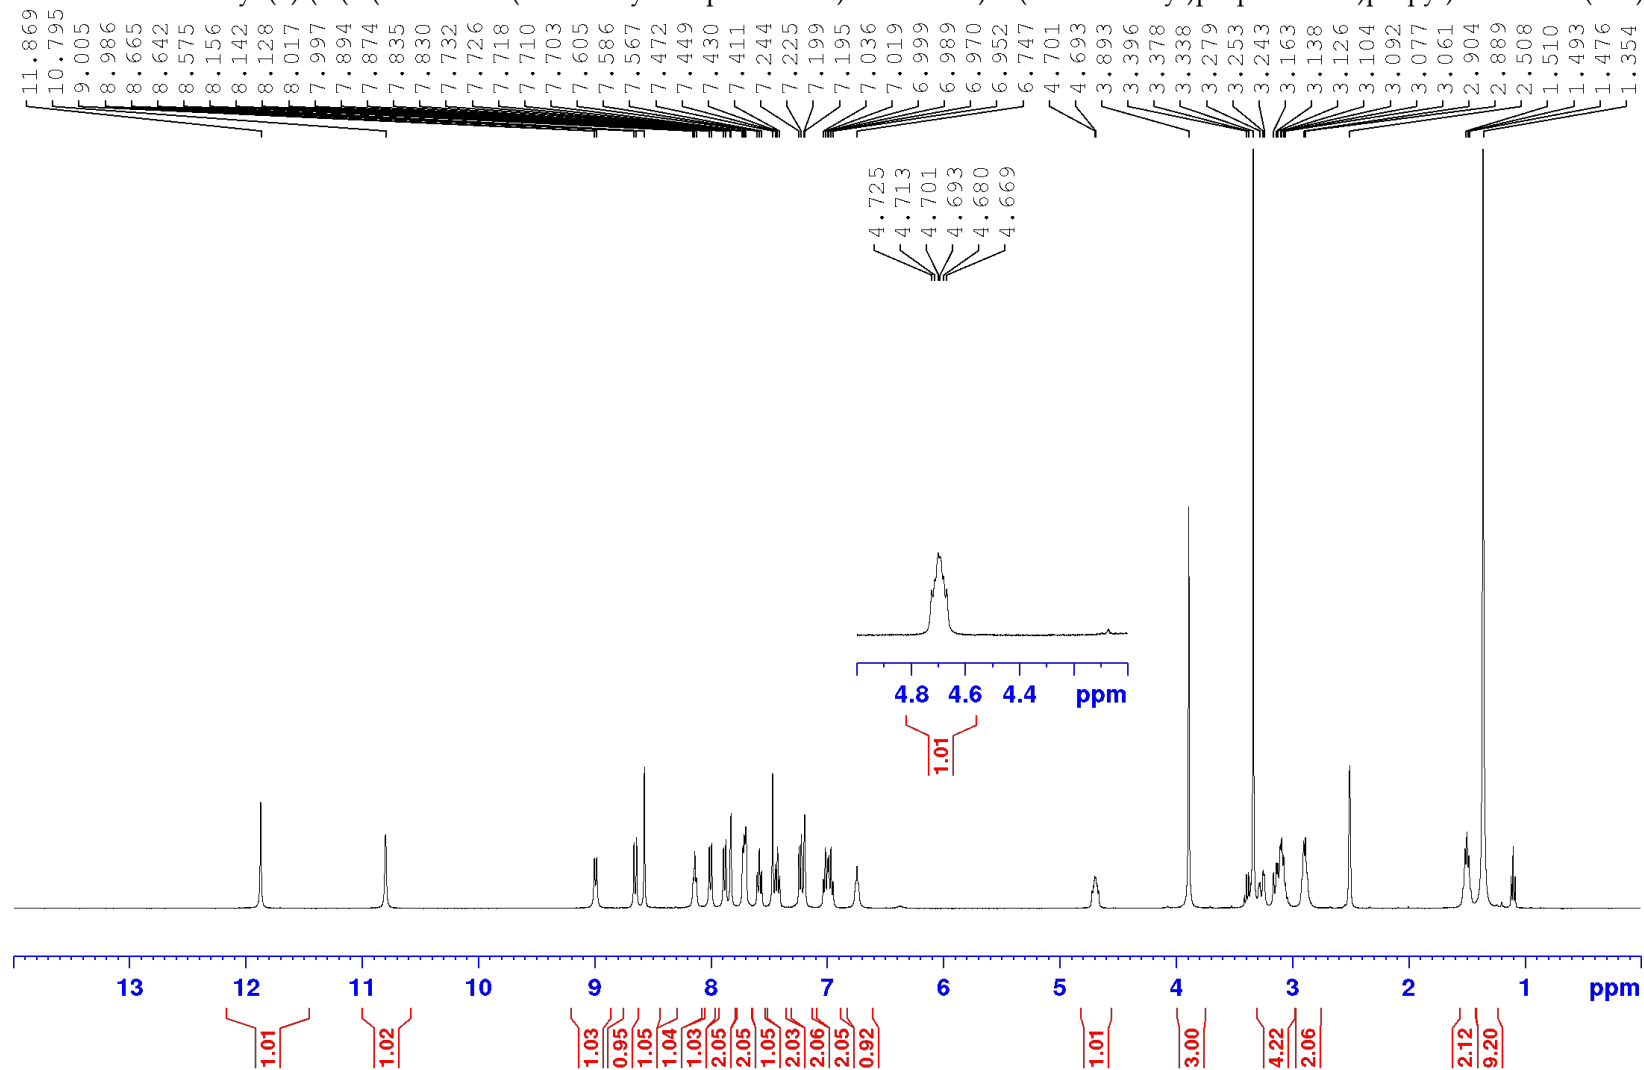

$^{13}\text{C}$  NMR of *tert*-butyl (S)-(3-(2-(5-bromo-2-(3-methoxy-2-naphthamido)benzamido)-3-(1H-indol-3-yl)propanamido)propyl)carbamate (11d)

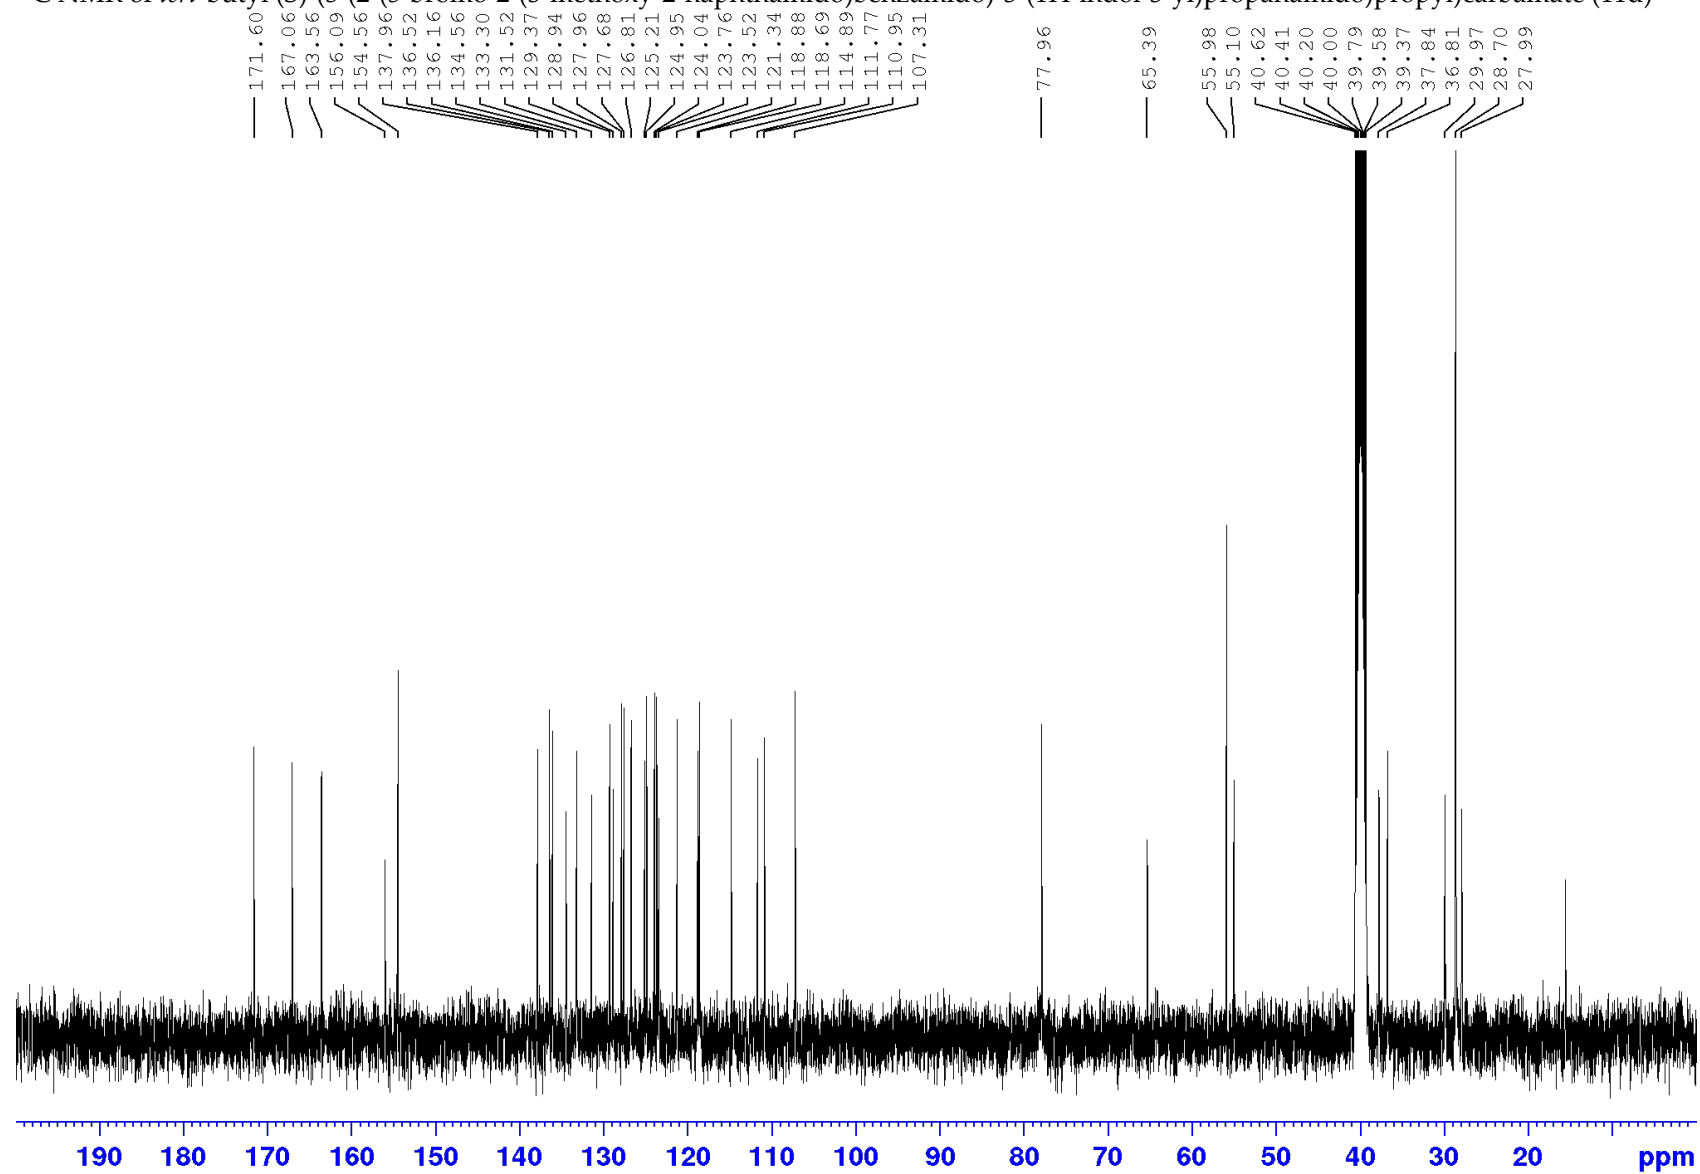



$^1\text{H}$  NMR of *tert*-butyl (S)-(3-(2-(5-bromo-2-(quinoline-2-carboxamido)benzamido)-3-(1*H*-indol-3-yl)propanamido)propyl)carbamate (11e)

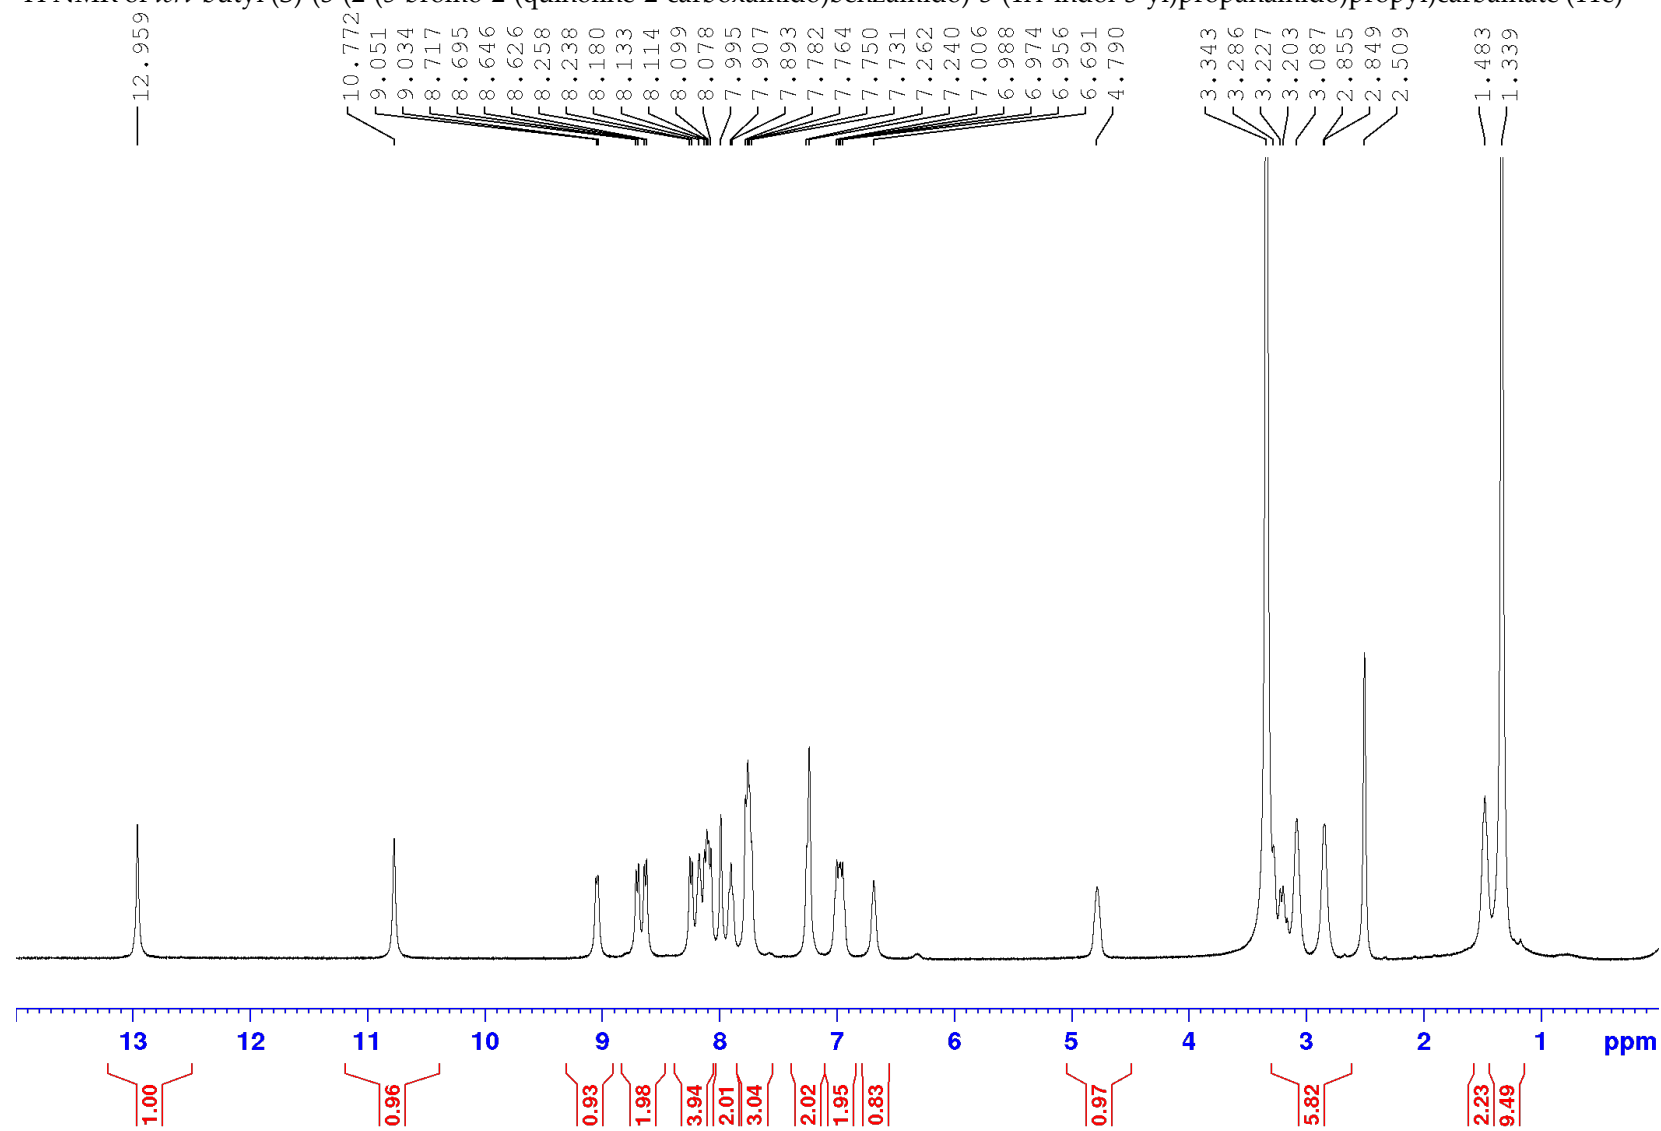

$^{13}\text{C}$  NMR of *tert*-butyl (S)-3-(2-(5-bromo-2-(quinoline-2-carboxamido)benzamido)-3-(1*H*-indol-3-yl)propanamido)propylcarbamate (11e)

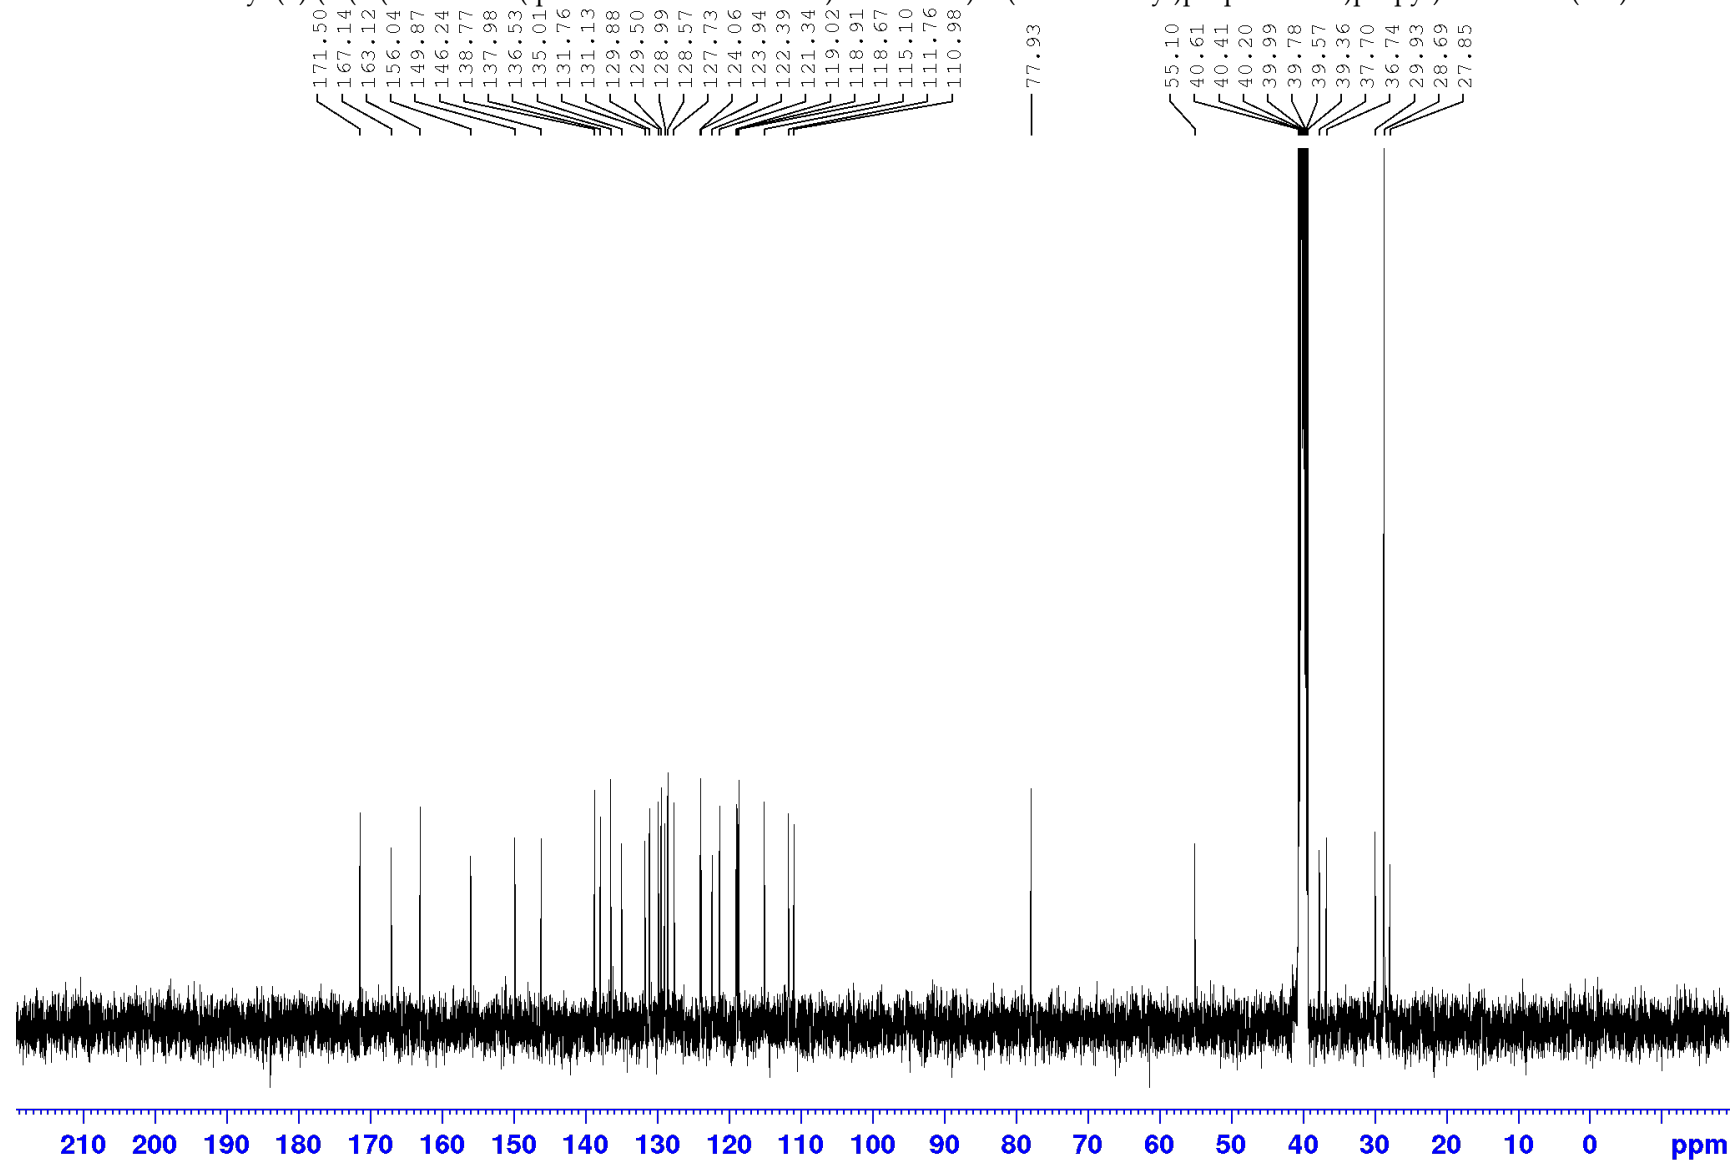

<sup>1</sup>H NMR of (S)-N-(1-((2-aminoethyl)amino)-3-(1H-indol-3-yl)-1-oxopropan-2-yl)-5-bromo-2-(2-(naphthalen-1-yl)acetamido)benzamide (12b)

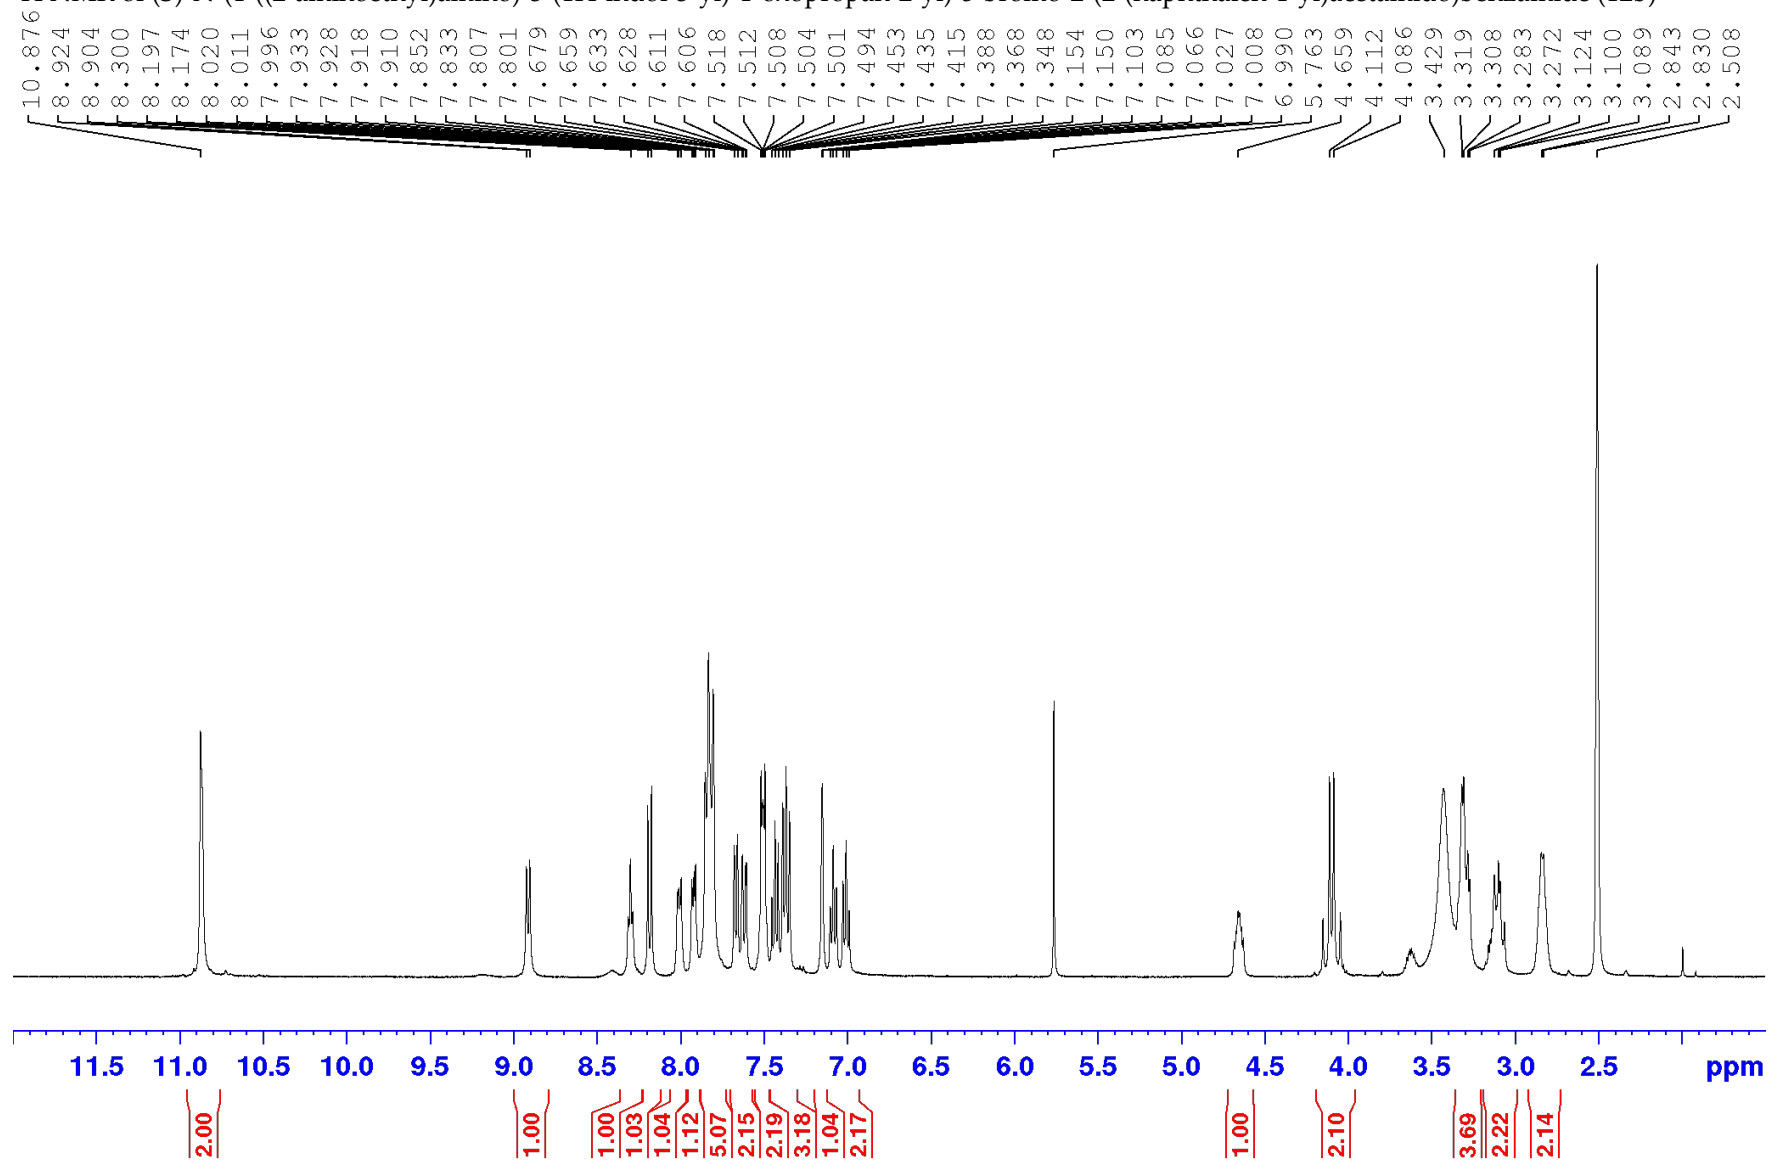

$^{13}\text{C}$  NMR of (S)-N-((2-aminoethyl)amino)-3-(1H-indol-3-yl)-1-oxopropan-2-yl)-5-bromo-2-(2-(naphthalen-1-yl)acetamido)benzamide (12b)

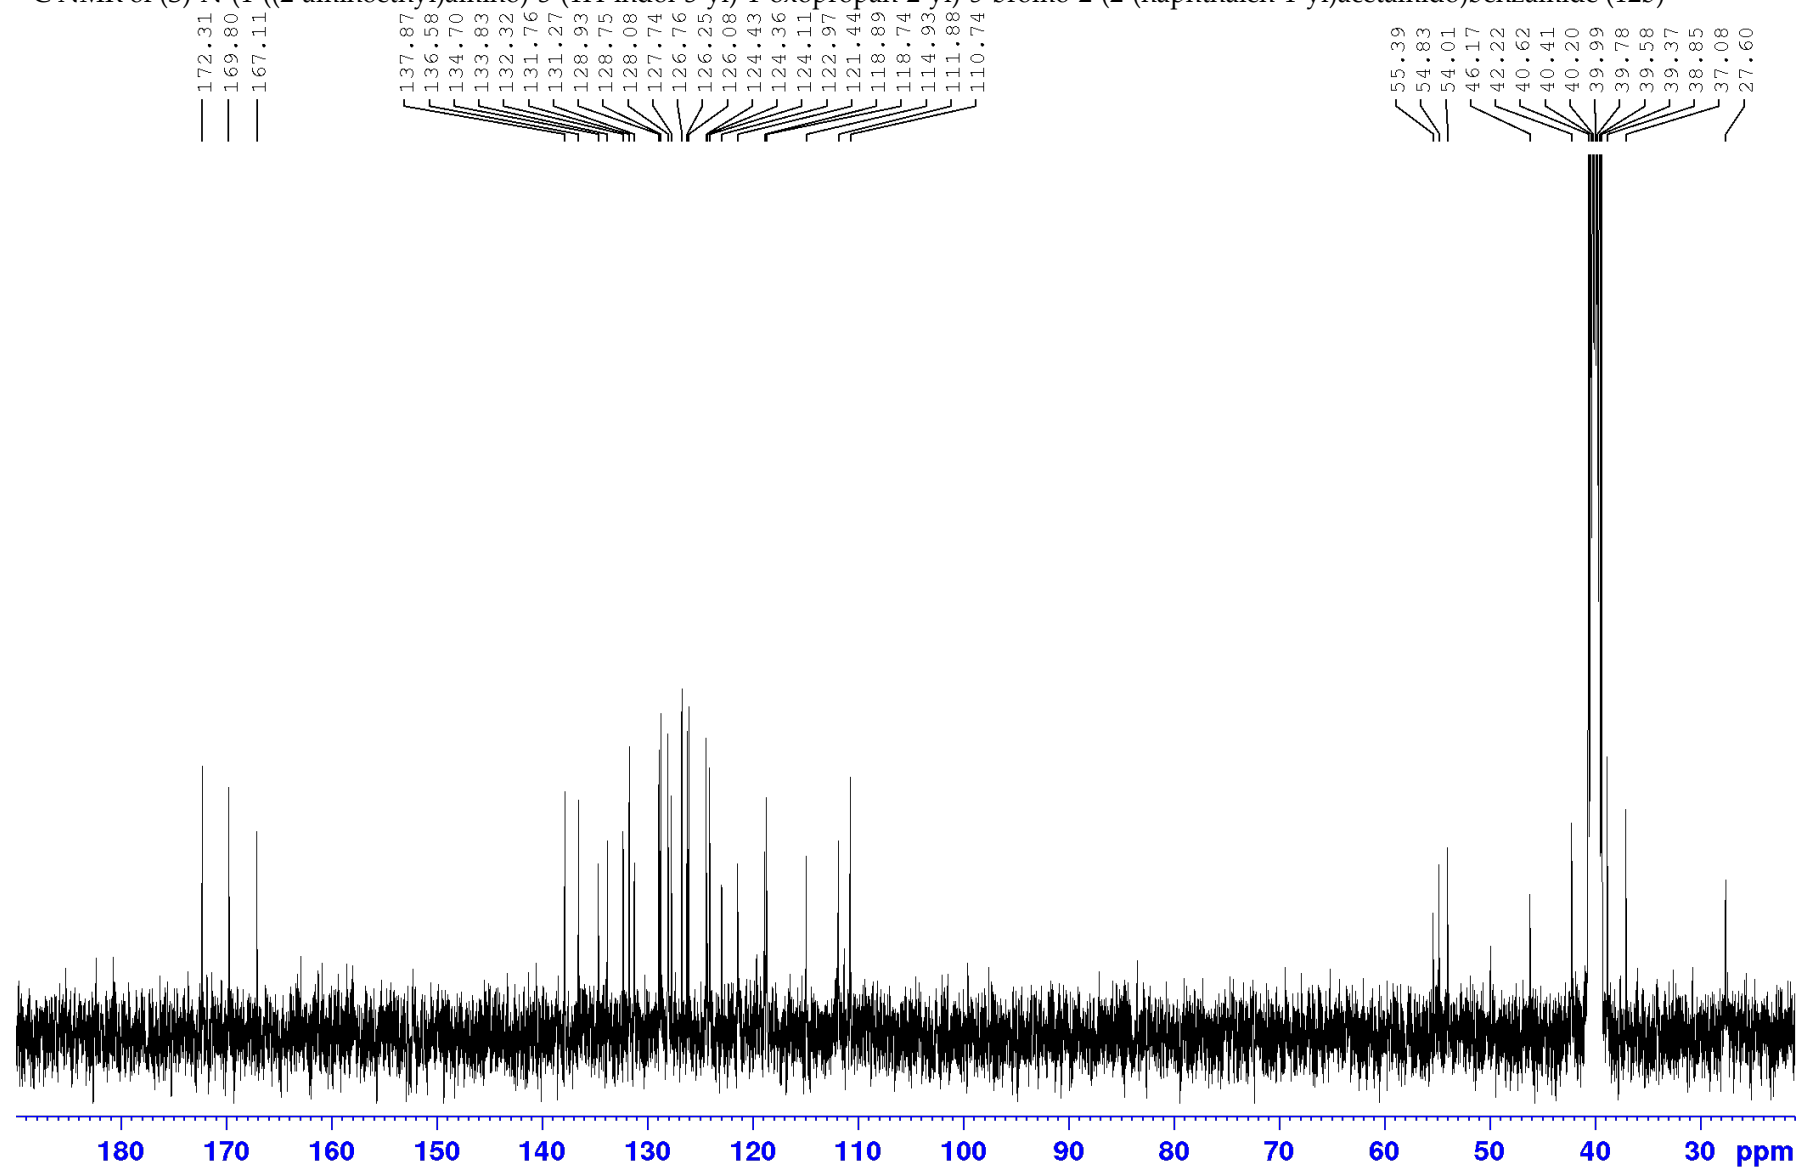

<sup>1</sup>H NMR of (S)-N-(2-((1-((2-aminoethyl)amino)-3-(1H-indol-3-yl)-1-oxopropan-2-yl)carbamoyl)-4-bromophenyl)-2-methoxy-1-naphthamide (12c)

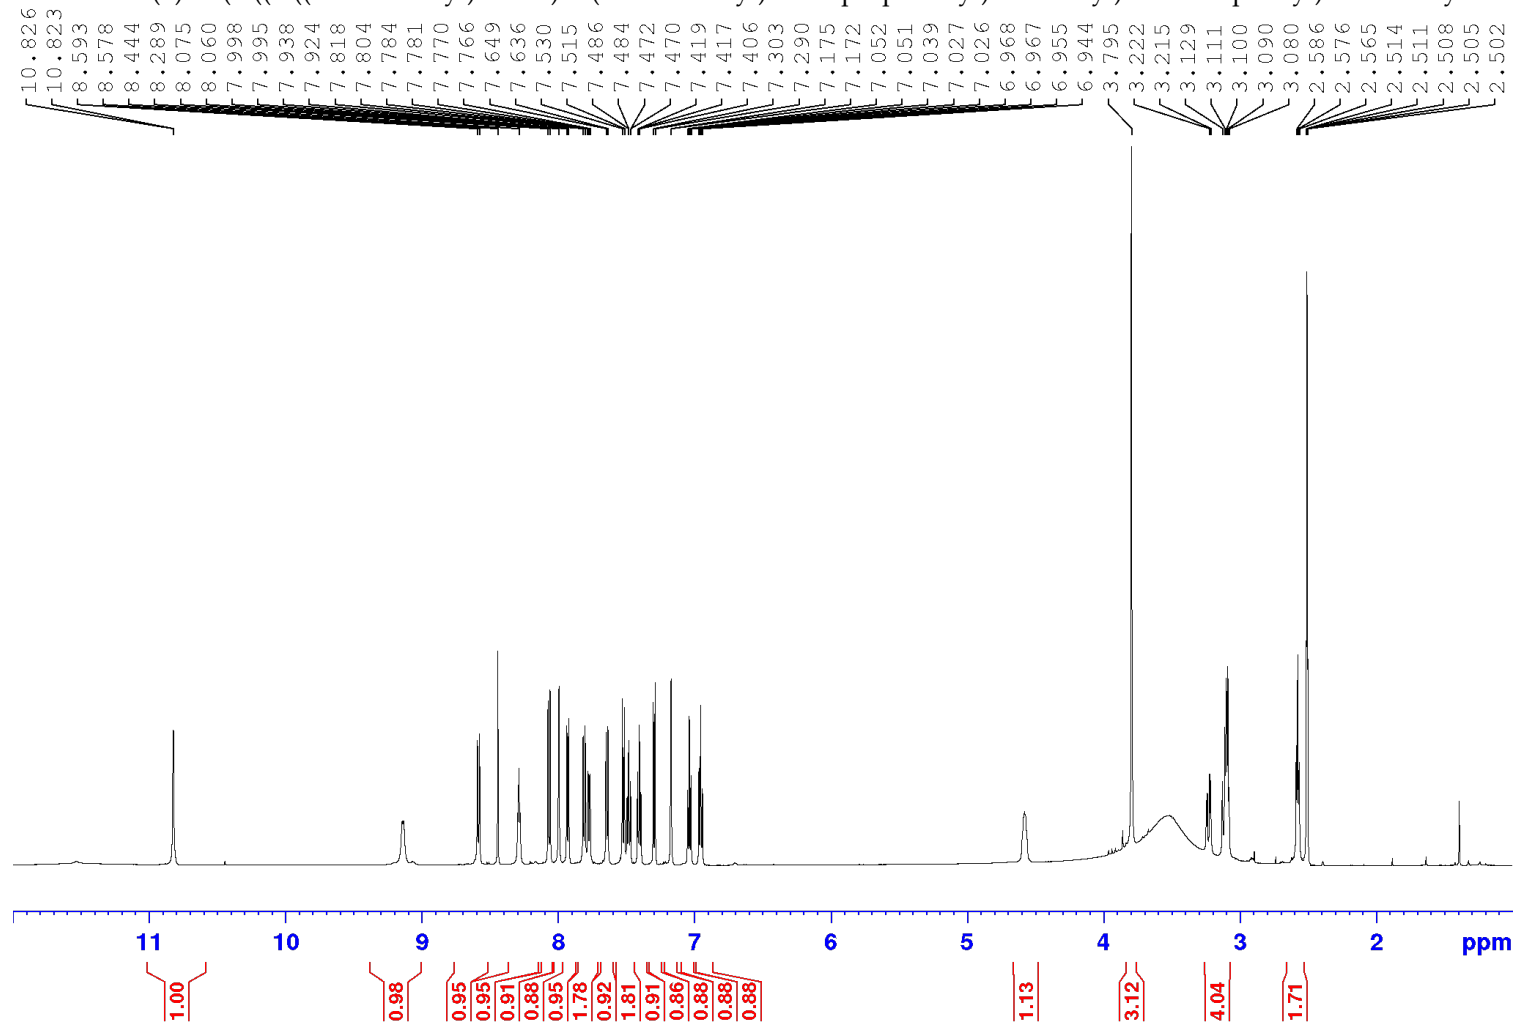

$^{13}\text{C}$  NMR of (S)-N-(2-((1-((2-aminoethyl)amino)-3-(1*H*-indol-3-yl)-1-oxopropan-2-yl)carbamoyl)-4-bromophenyl)-2-methoxy-1-naphthamide (12c)

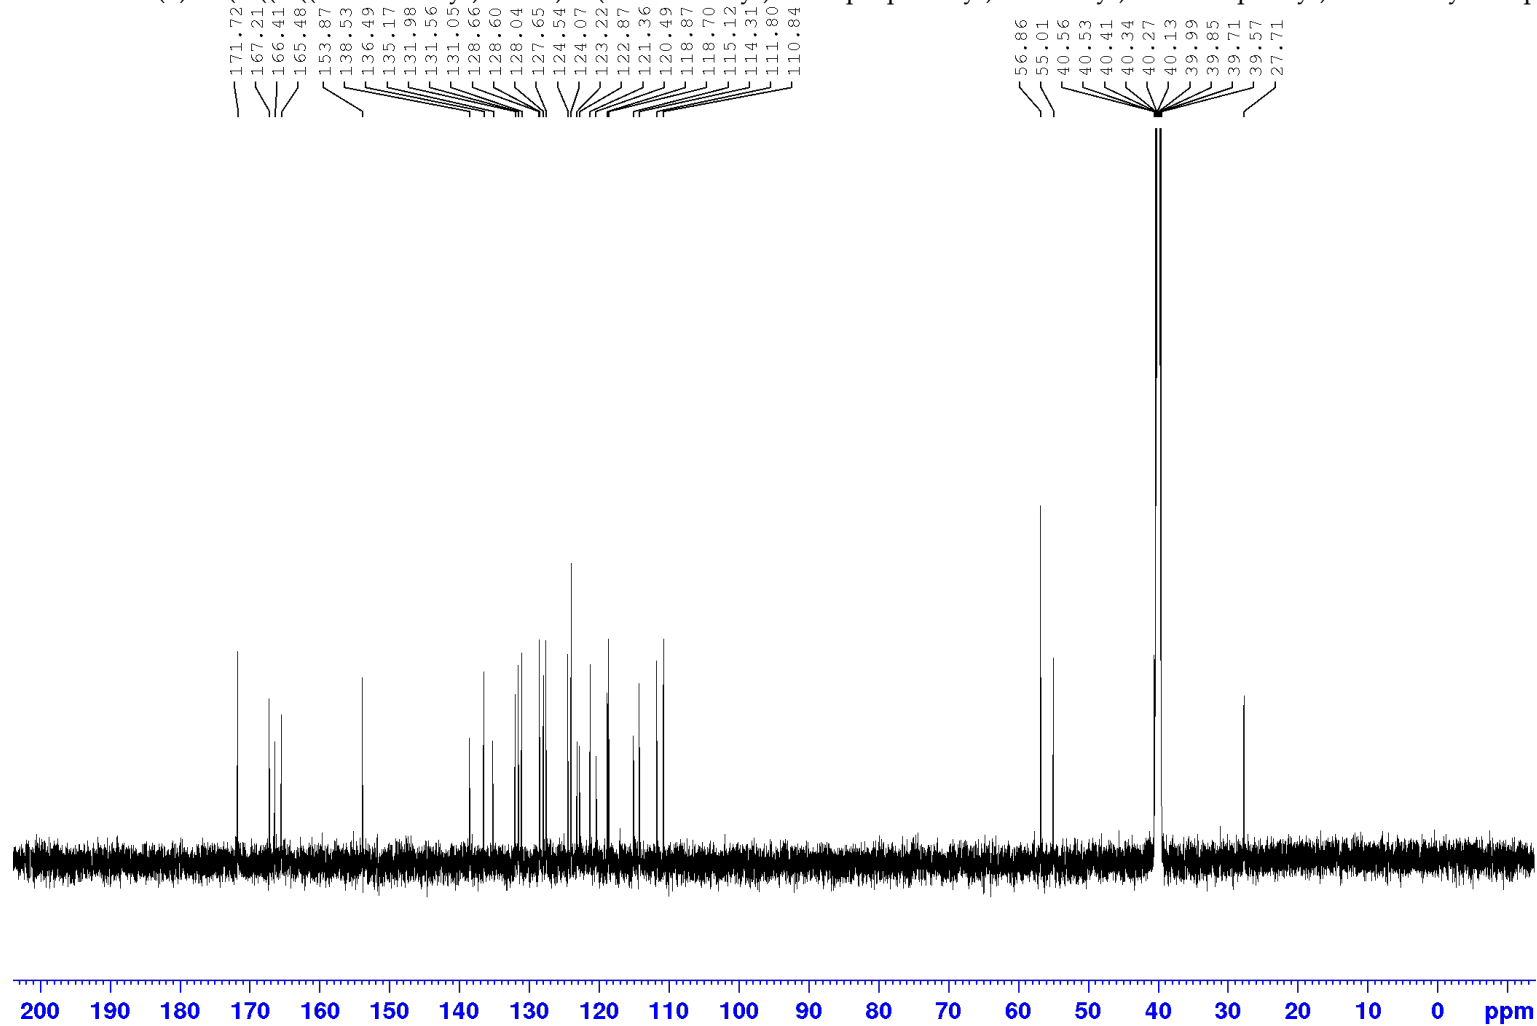

<sup>1</sup>H NMR of (S)-N-(2-((1-((2-aminoethyl)amino)-3-(1*H*-indol-3-yl)-1-oxopropan-2-yl)carbamoyl)-4-bromophenyl)-3-methoxy-2-naphthamide (12d)

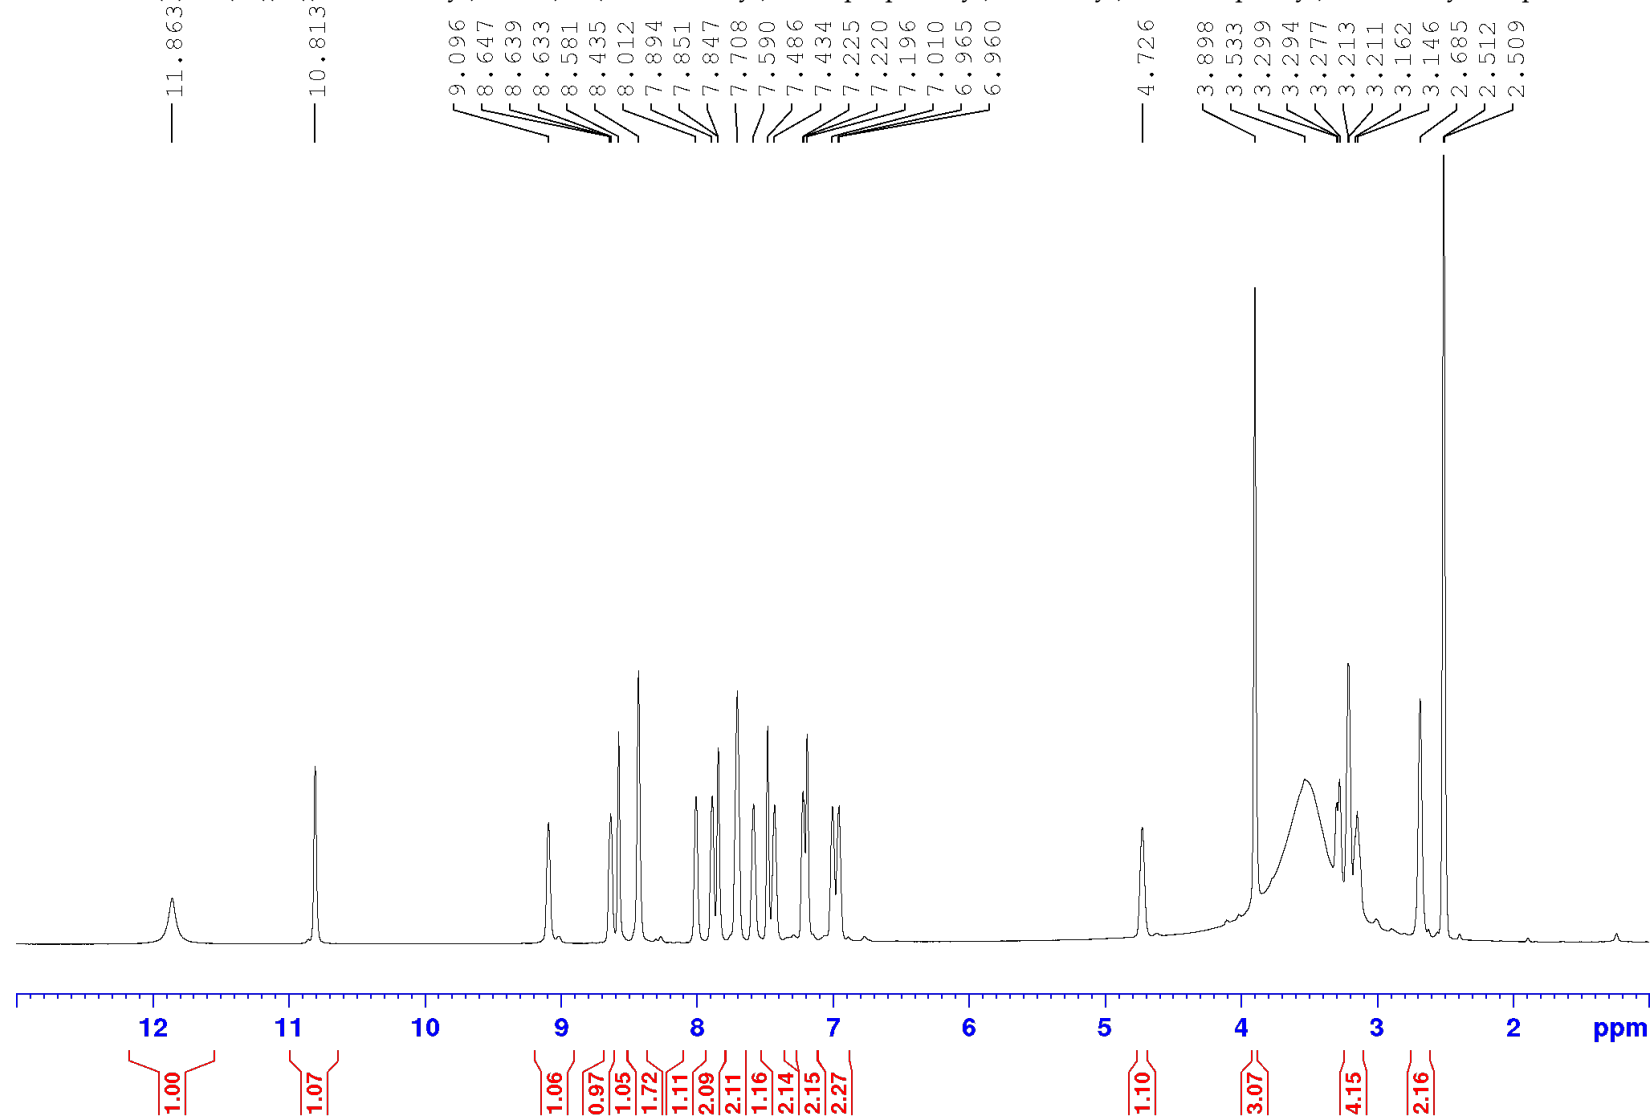

<sup>1</sup>H NMR of (S)-N-(2-((1-((2-aminoethyl)amino)-3-(1*H*-indol-3-yl)-1-oxopropan-2-yl)carbamoyl)-4-bromophenyl)quinoline-2-carboxamide (12e)

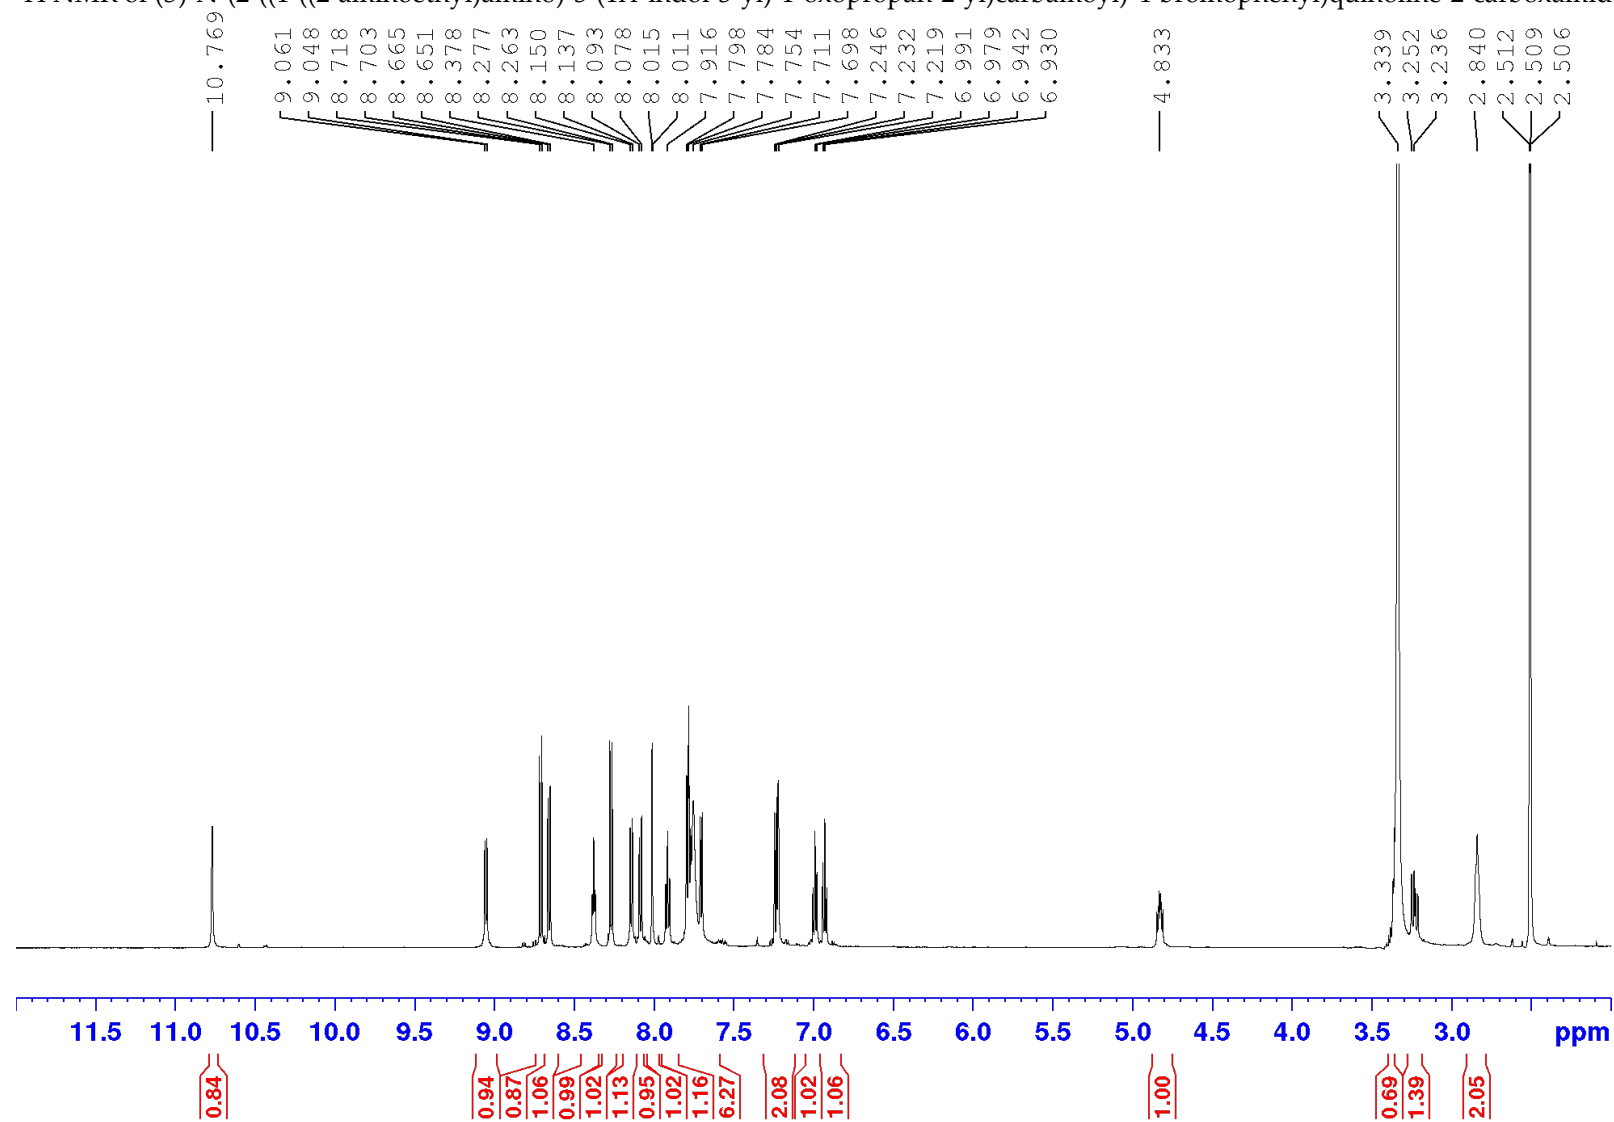



<sup>1</sup>H NMR of (S)-N-(2-((1-((2-aminoethyl)amino)-3-(1*H*-indol-3-yl)-1-oxopropan-2-yl)carbamoyl)-4-bromophenyl)quinoline-2-carboxamide (12e)

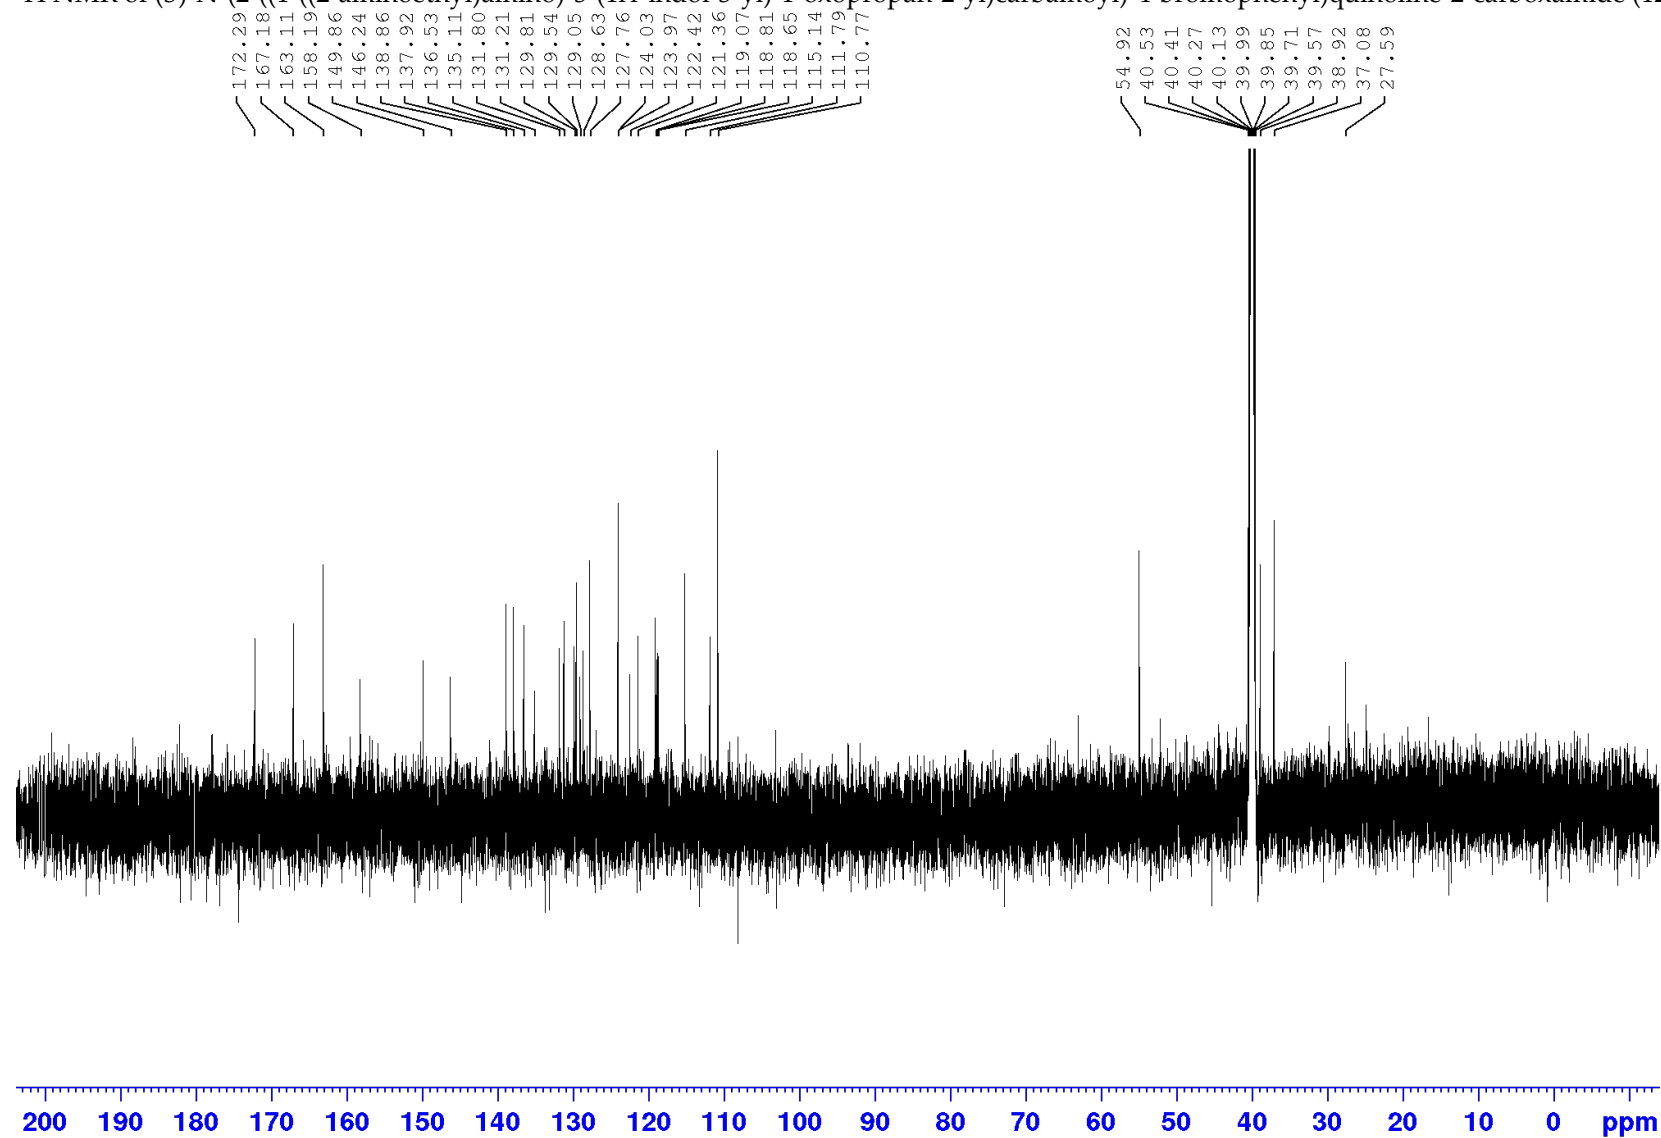

<sup>1</sup>H NMR of (S)-N-(2-((1-((2-aminoethyl)amino)-3-(1H-indol-3-yl)-1-oxopropan-2-yl)carbamoyl)-4-bromophenyl)-1H-indole-2-carboxamide (12f)

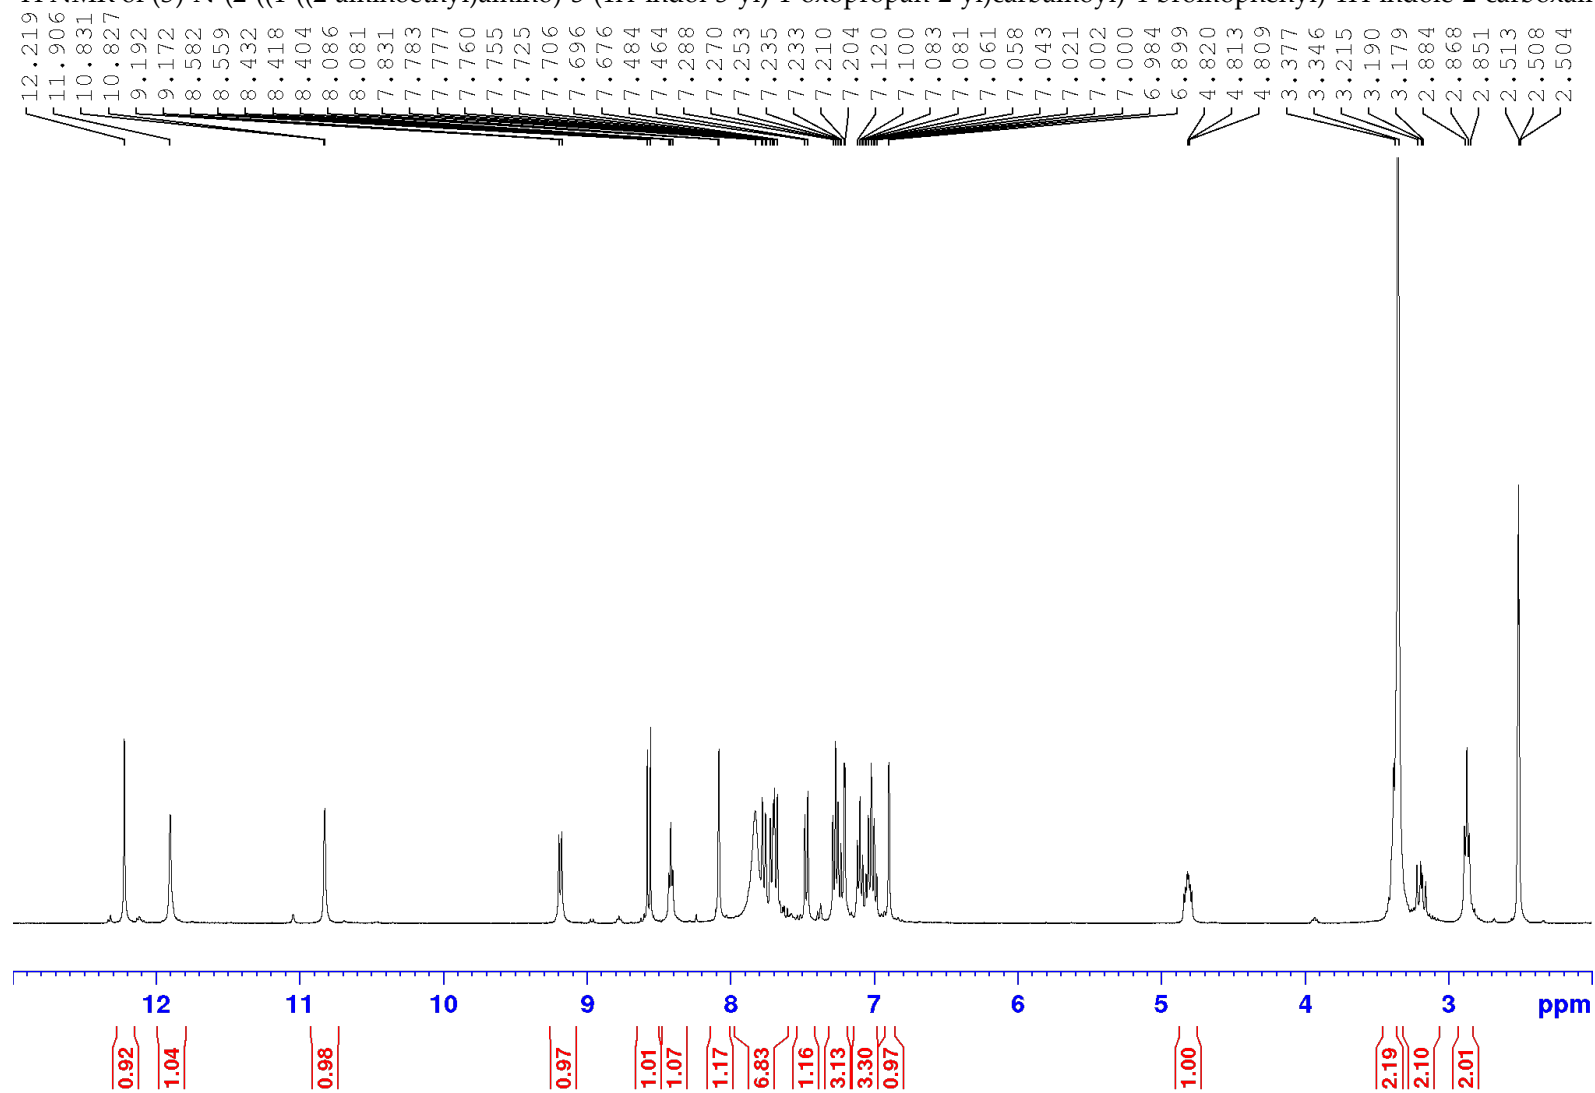

$^{13}\text{C}$  NMR of (S)-N-(2-((1-((2-aminoethyl)amino)-3-(1*H*-indol-3-yl)-1-oxopropan-2-yl)carbamoyl)-4-bromophenyl)-1*H*-indole-2-carboxamide (12f)

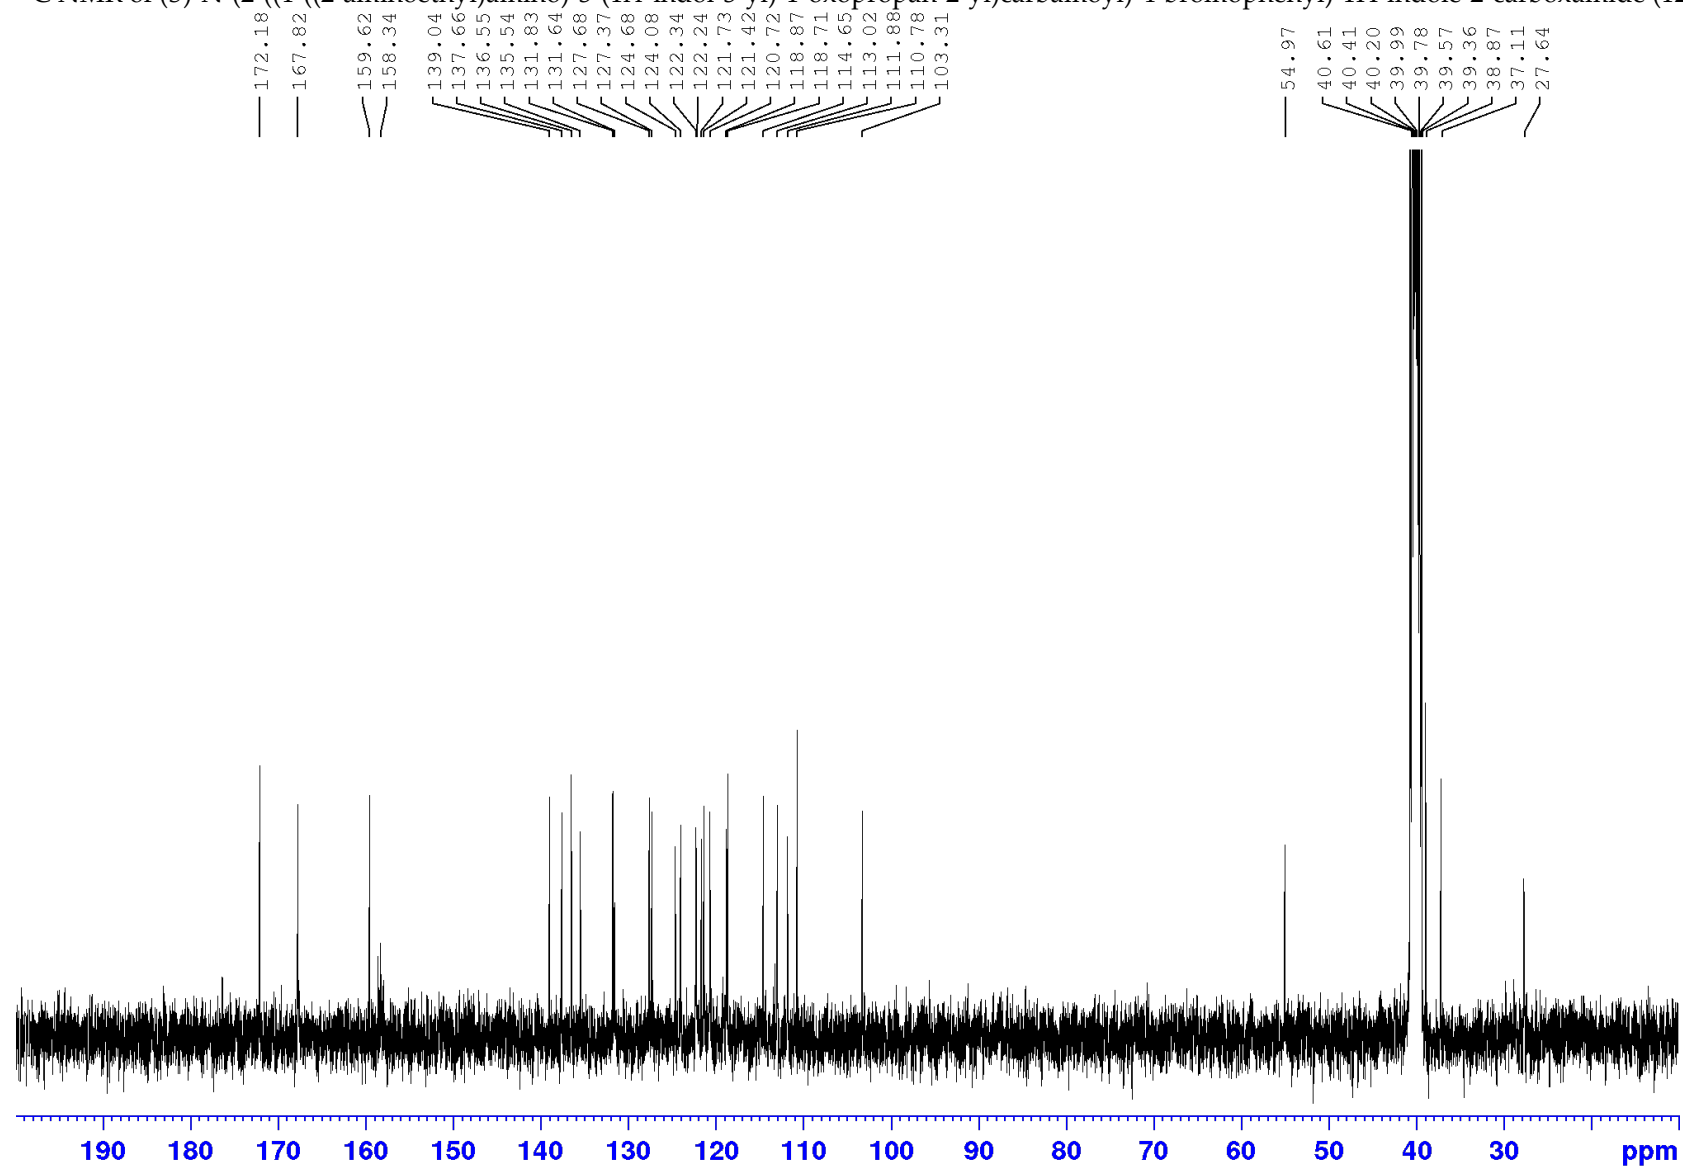

<sup>1</sup>H NMR of (S)-N-(2-((1-((2-aminoethyl)amino)-3-(1*H*-indol-3-yl)-1-oxopropan-2-yl)carbamoyl)-4-bromophenyl)thiophene-2-carboxamide (12g)

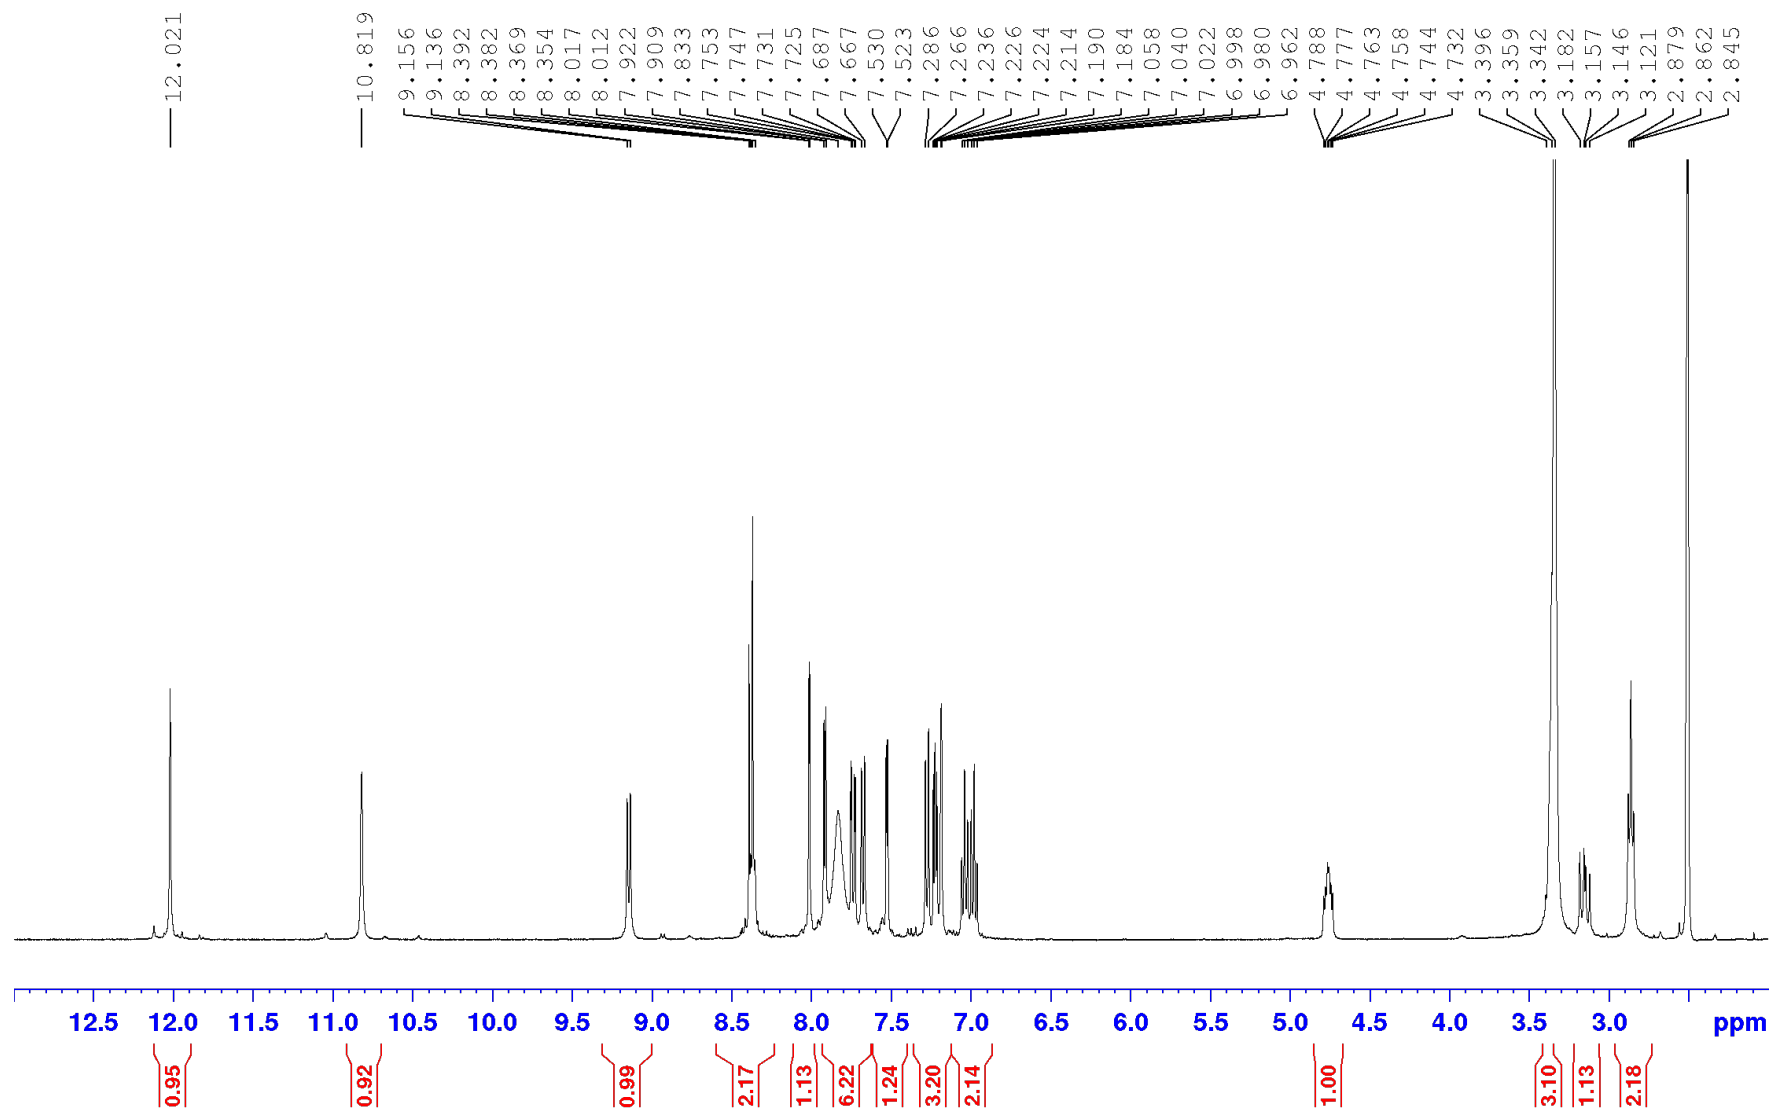

$^{13}\text{C}$  NMR of (S)-N-(2-((1-((2-aminoethyl)amino)-3-(1*H*-indol-3-yl)-1-oxopropan-2-yl)carbamoyl)-4-bromophenyl)thiophene-2-carboxamide (12g)

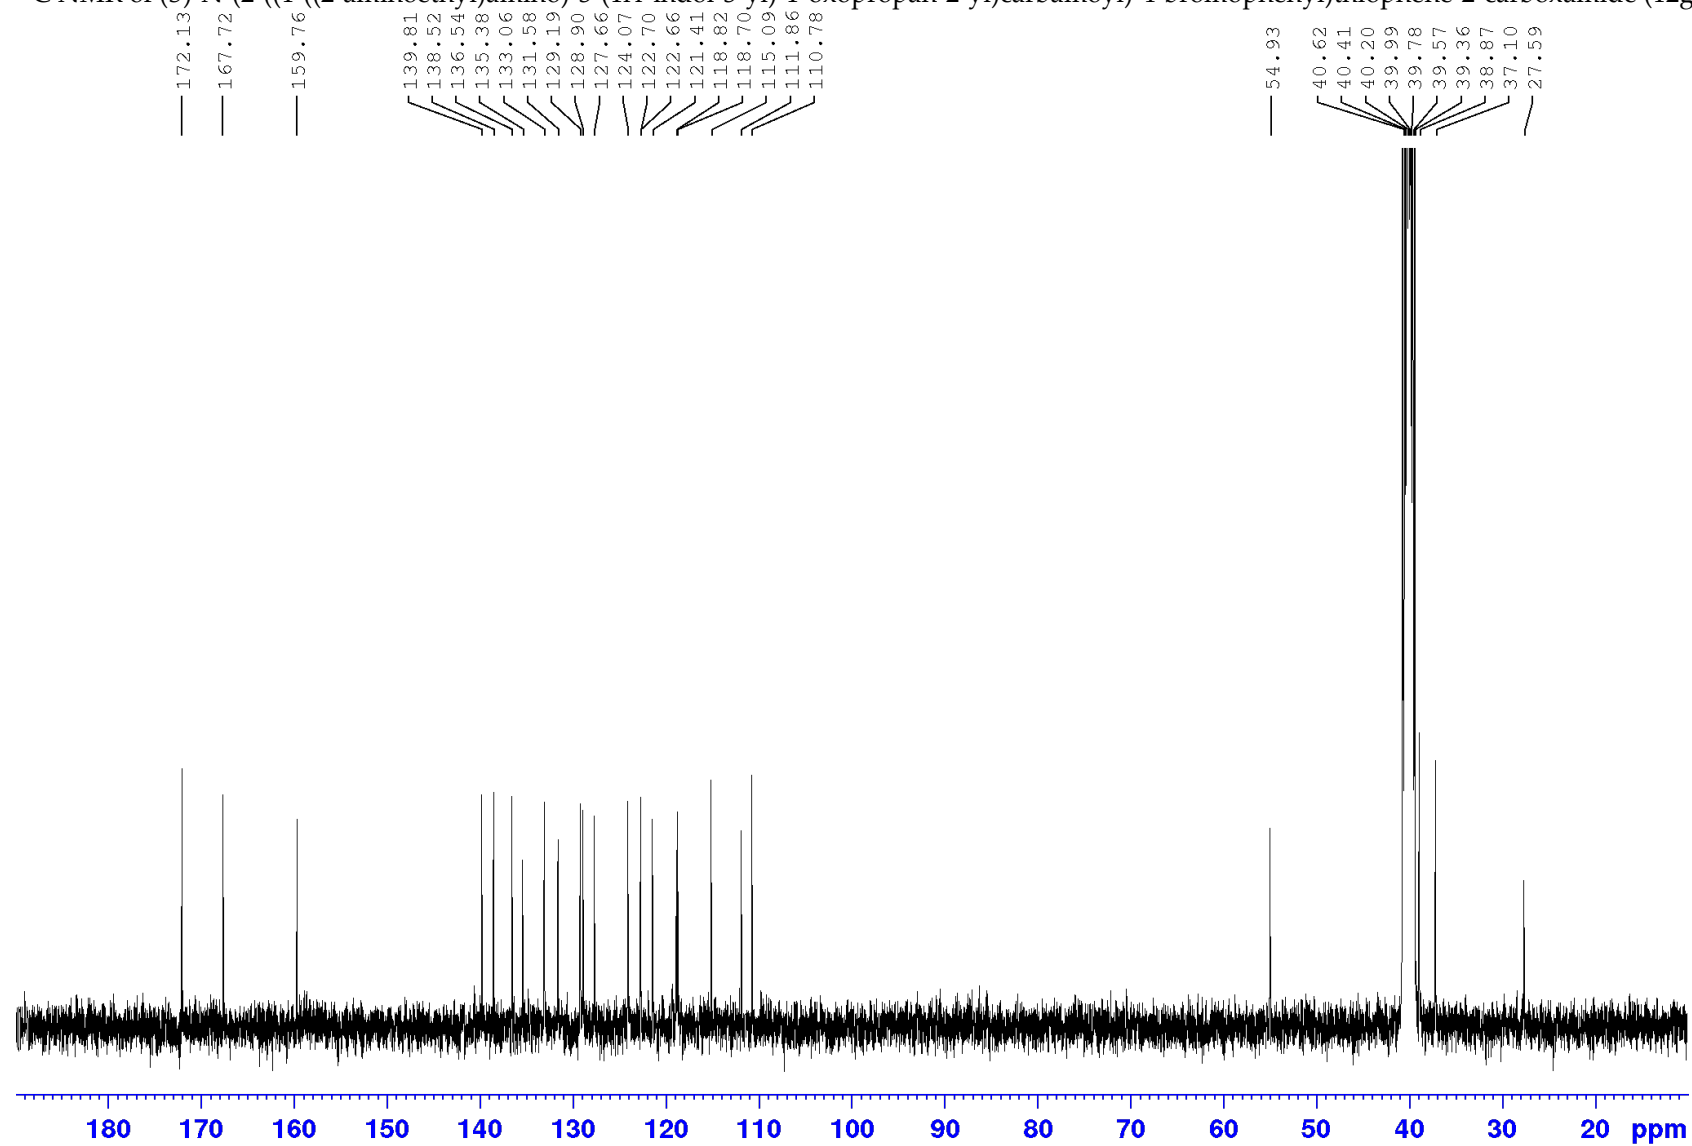

<sup>1</sup>H NMR of (S)-N-(2-((1-((2-aminoethyl)amino)-3-(1H-indol-3-yl)-1-oxopropan-2-yl)carbamoyl)-4-bromophenyl)thiophene-3-carboxamide (12h)

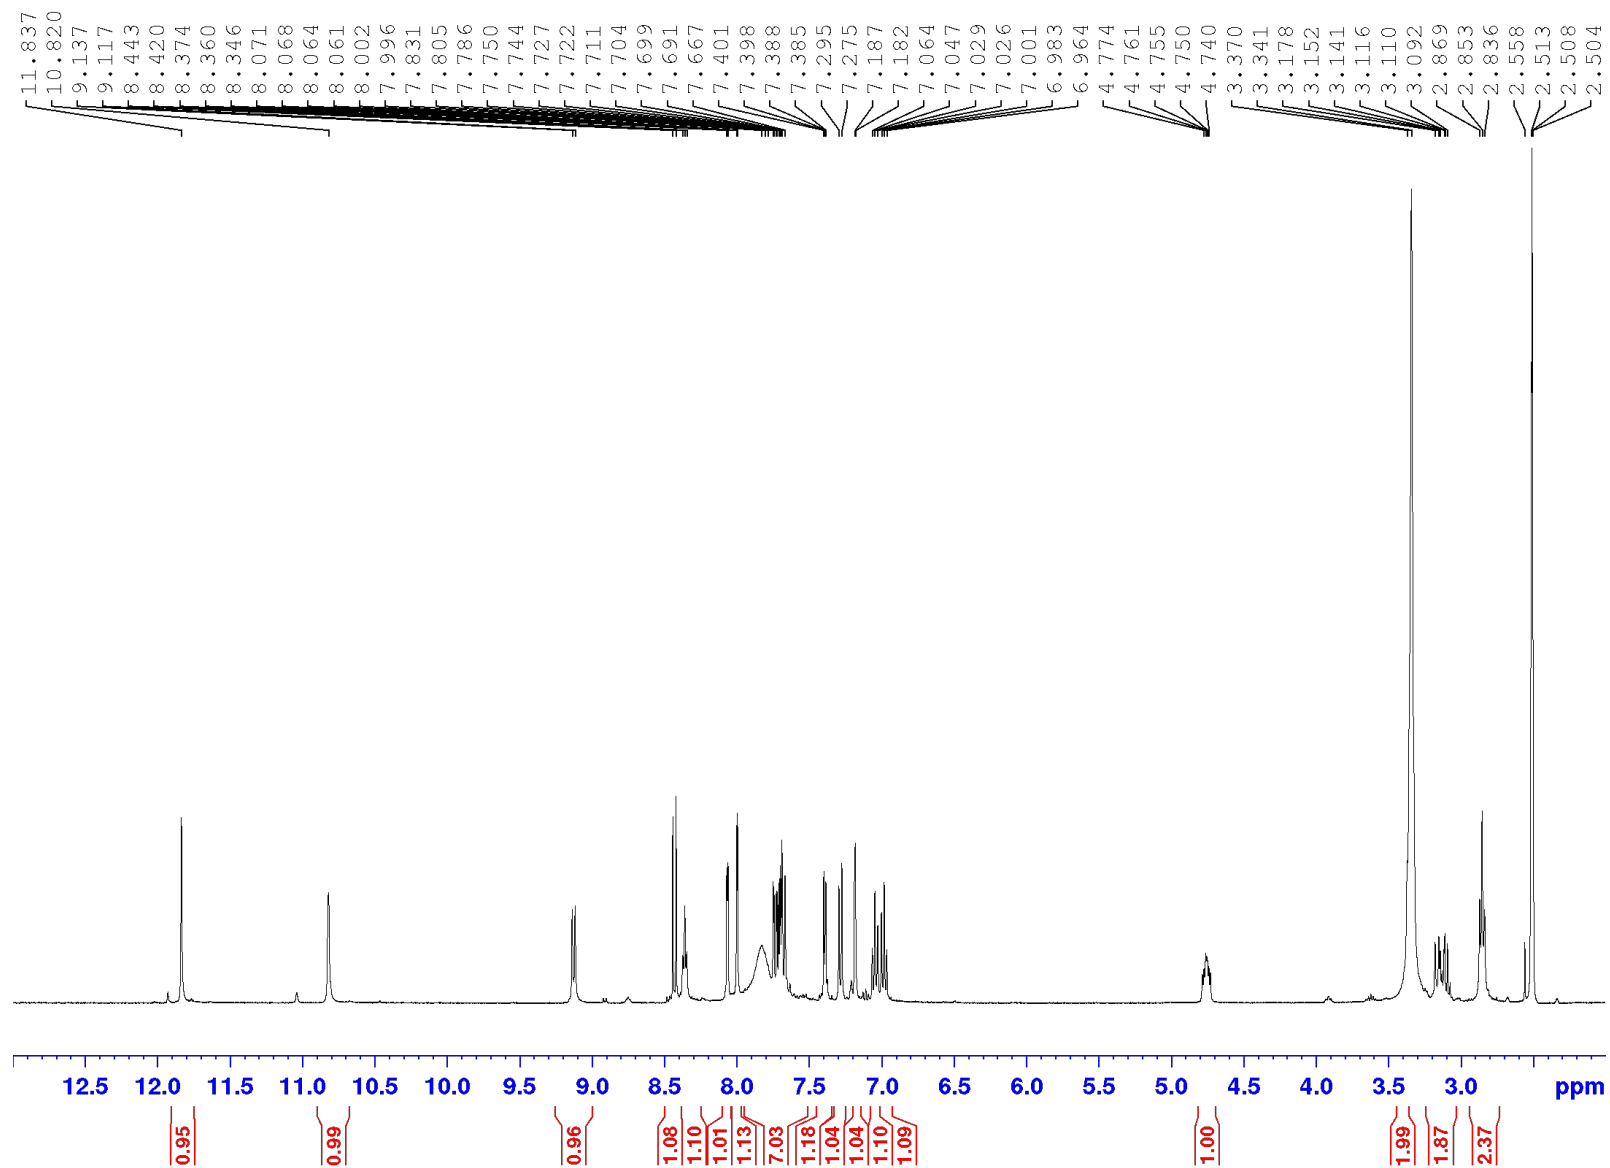

$^{13}\text{C}$  NMR of (S)-N-(2-((1-((2-aminoethyl)amino)-3-(1H-indol-3-yl)-1-oxopropan-2-yl)carbamoyl)-4-bromophenyl)thiophene-3-carboxamide (12h)

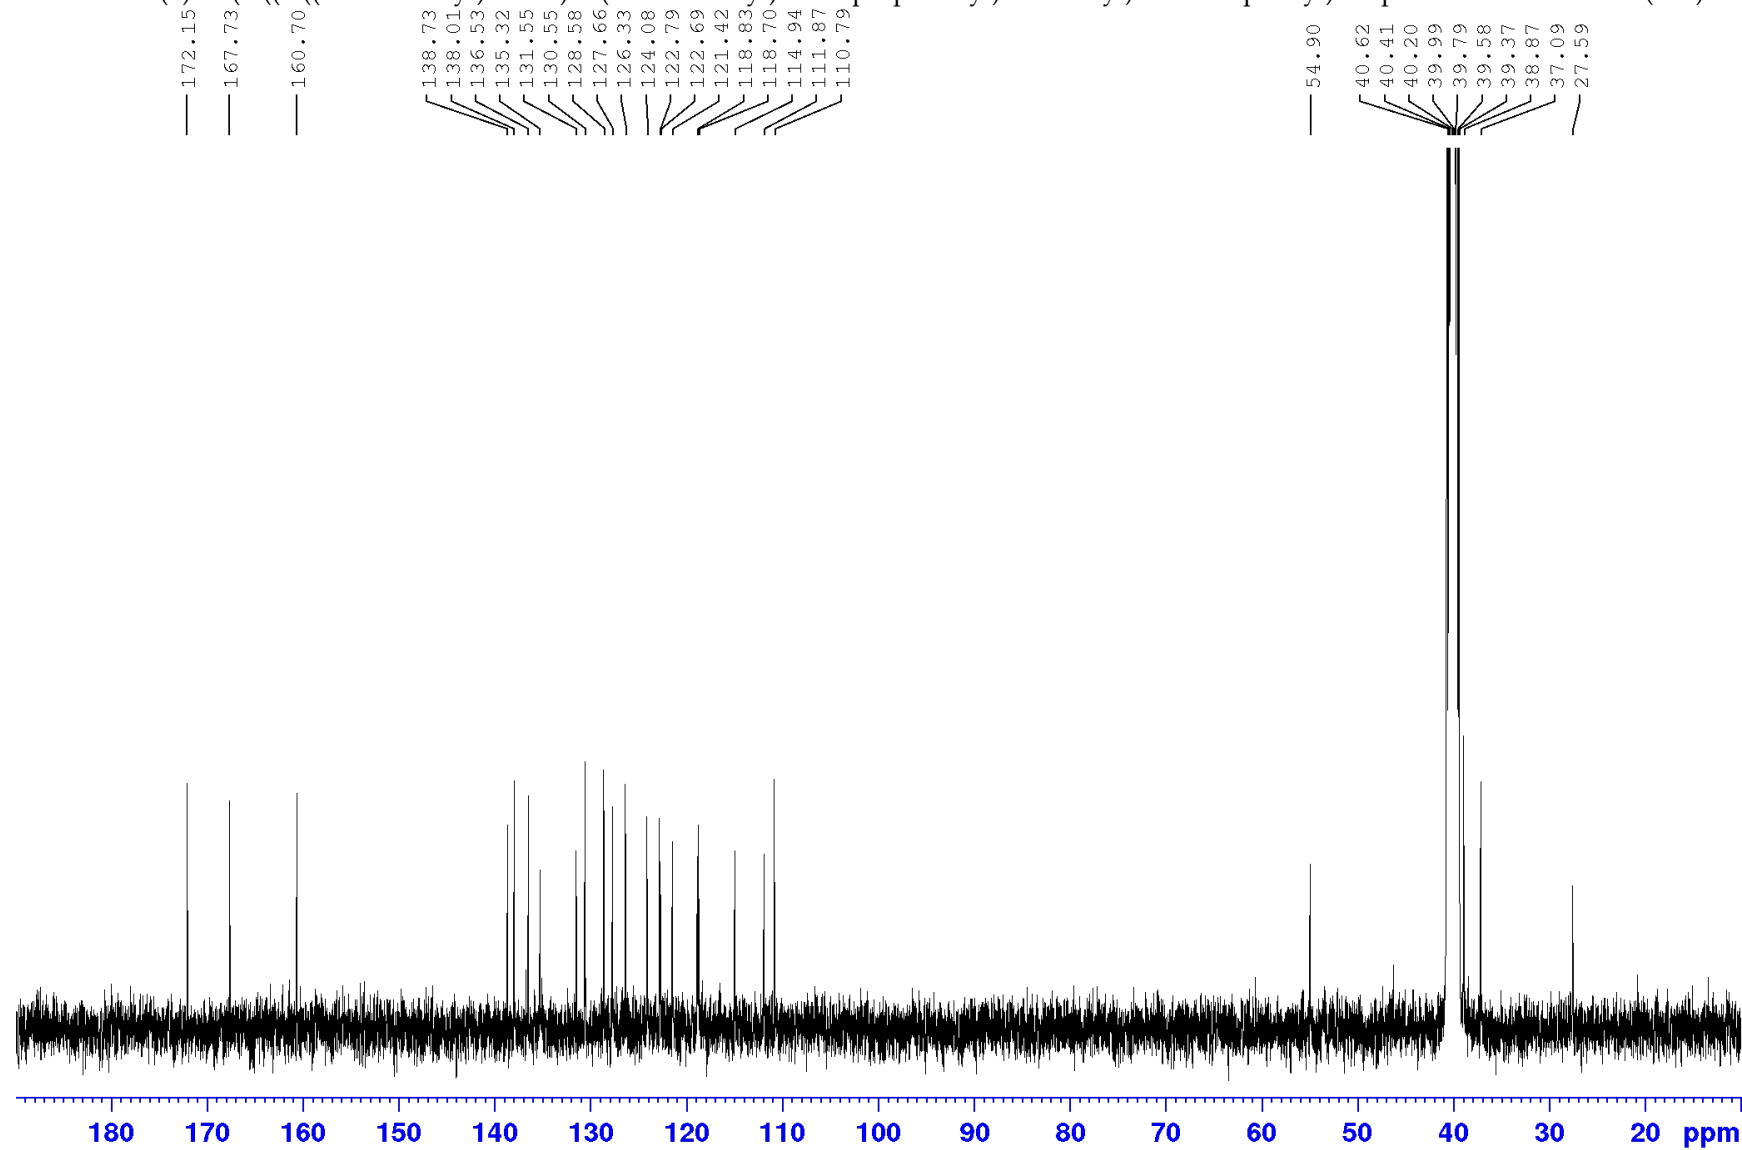

<sup>1</sup>H NMR of (S)-N-(2-((1-((2-aminoethyl)amino)-3-(1H-indol-3-yl)-1-oxopropan-2-yl)carbamoyl)-4-bromophenyl)-[1,1'-biphenyl]-2-carboxamide (12i)

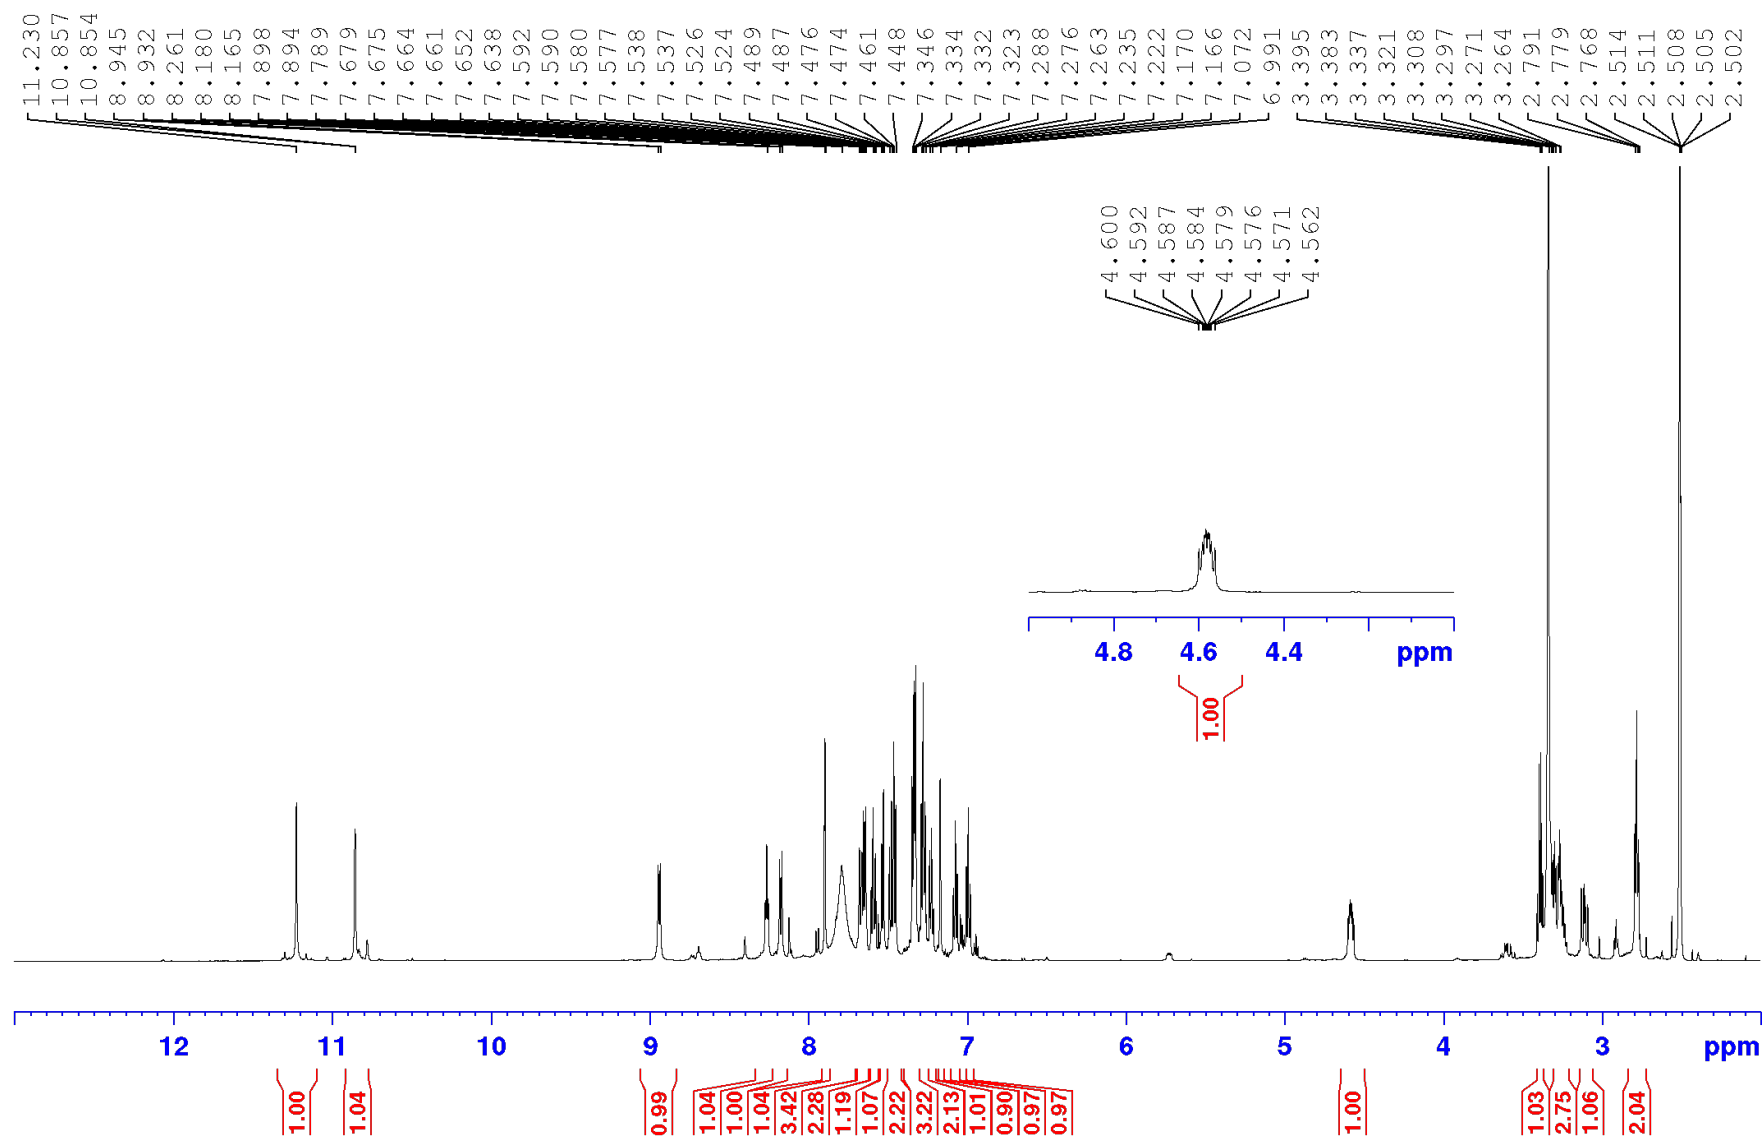



$^{13}\text{C}$  NMR of (S)-N-(2-((1-((2-aminoethyl)amino)-3-(1H-indol-3-yl)-1-oxopropan-2-yl)carbamoyl)-4-bromophenyl)-[1,1'-biphenyl]-2-carboxamide (12i)

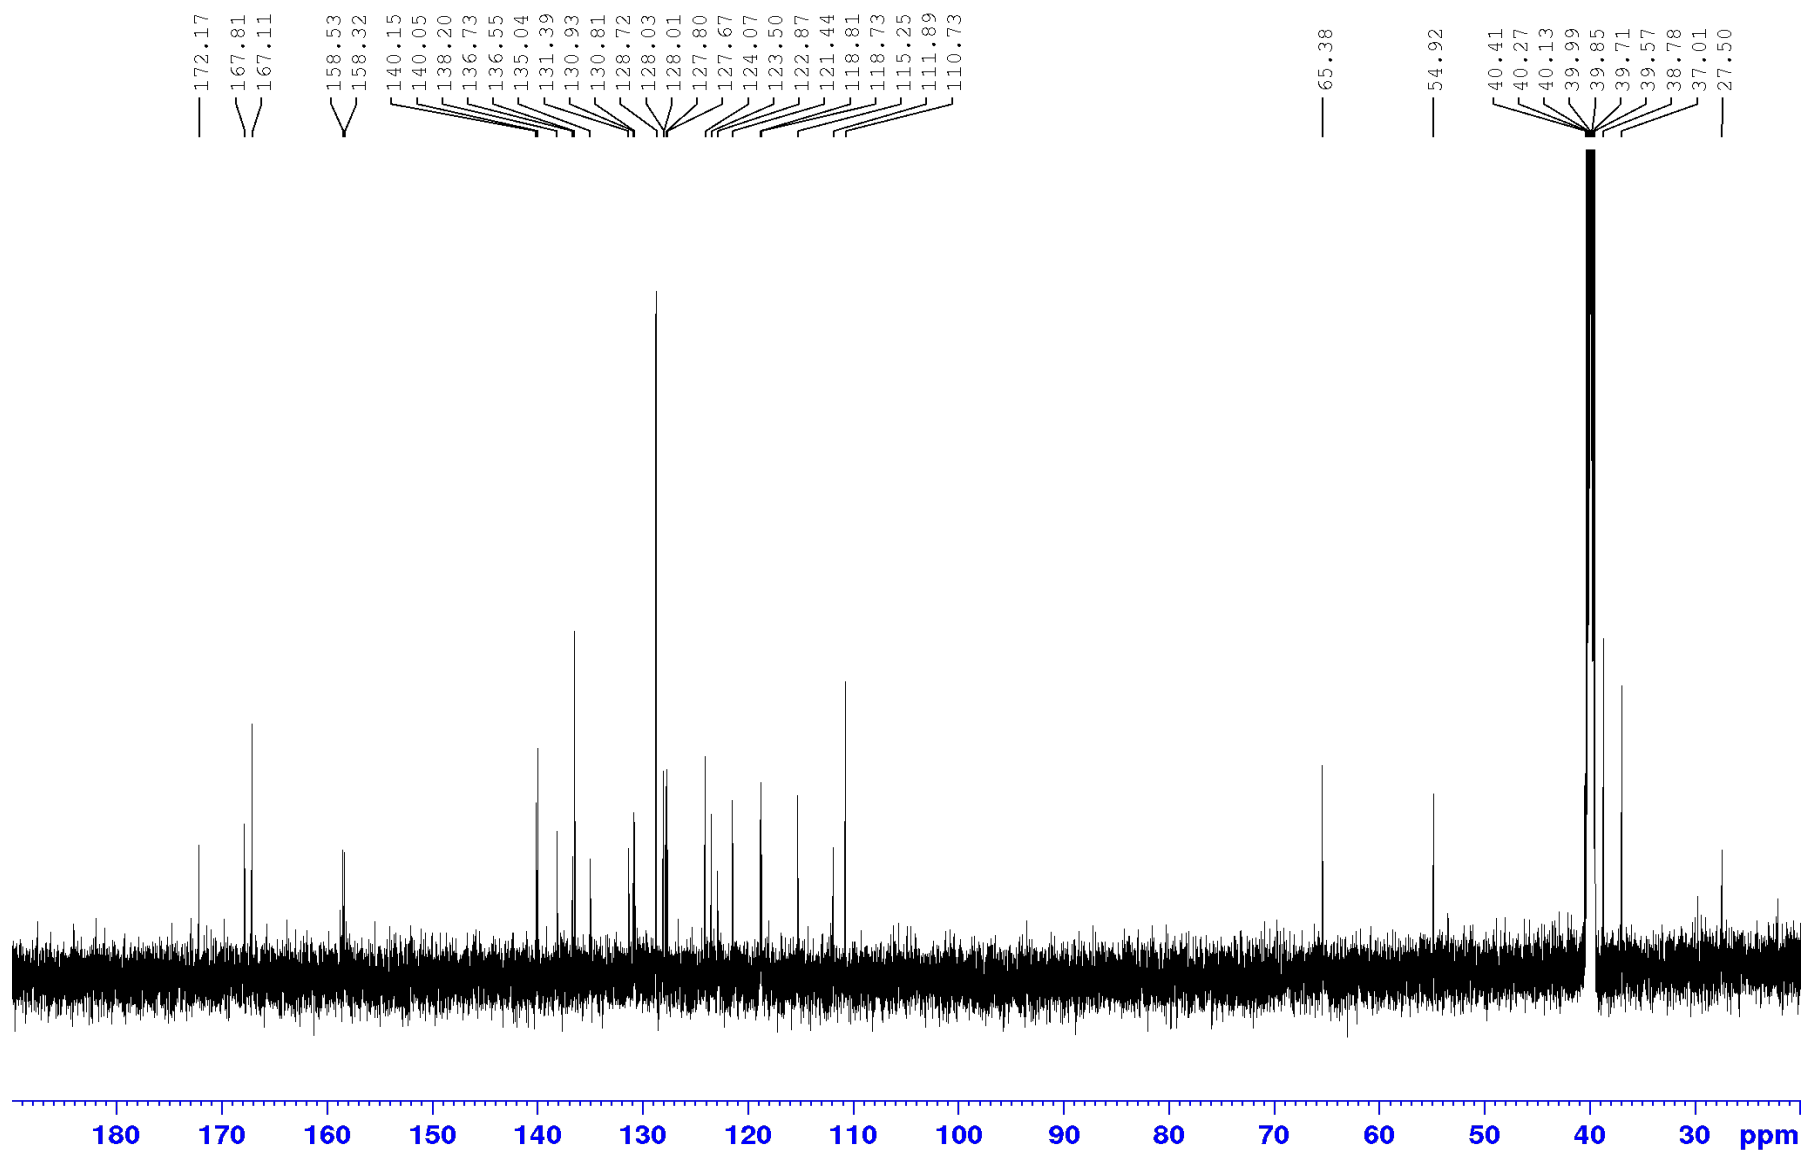

<sup>1</sup>H NMR of (S)-N-(2-((1-((2-aminoethyl)amino)-3-(1*H*-indol-3-yl)-1-oxopropan-2-yl)carbamoyl)-4-bromophenyl)-[1,1'-biphenyl]-3-carboxamide (12j)

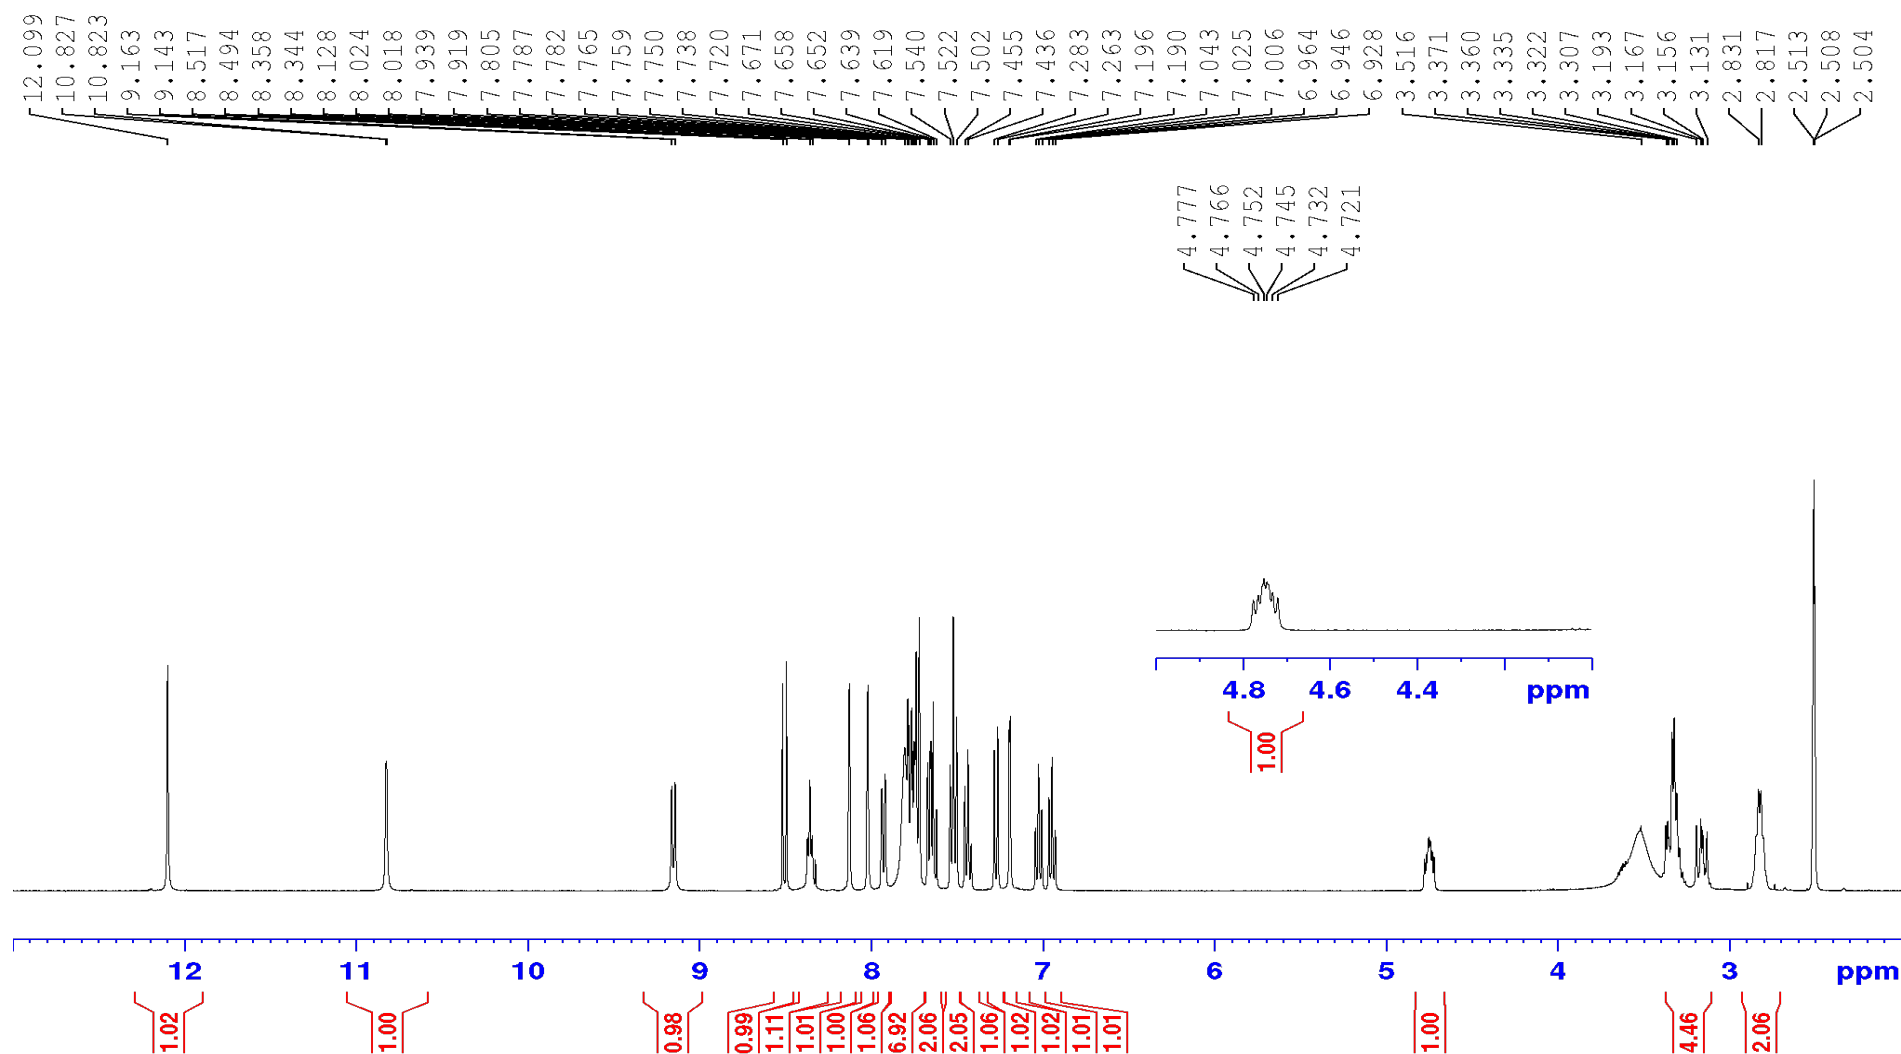

$^{13}\text{C}$  NMR of (S)-N-(2-((1-((2-aminoethyl)amino)-3-(1*H*-indol-3-yl)-1-oxopropan-2-yl)carbamoyl)-4-bromophenyl)-[1,1'-biphenyl]-3-carboxamide (12j)

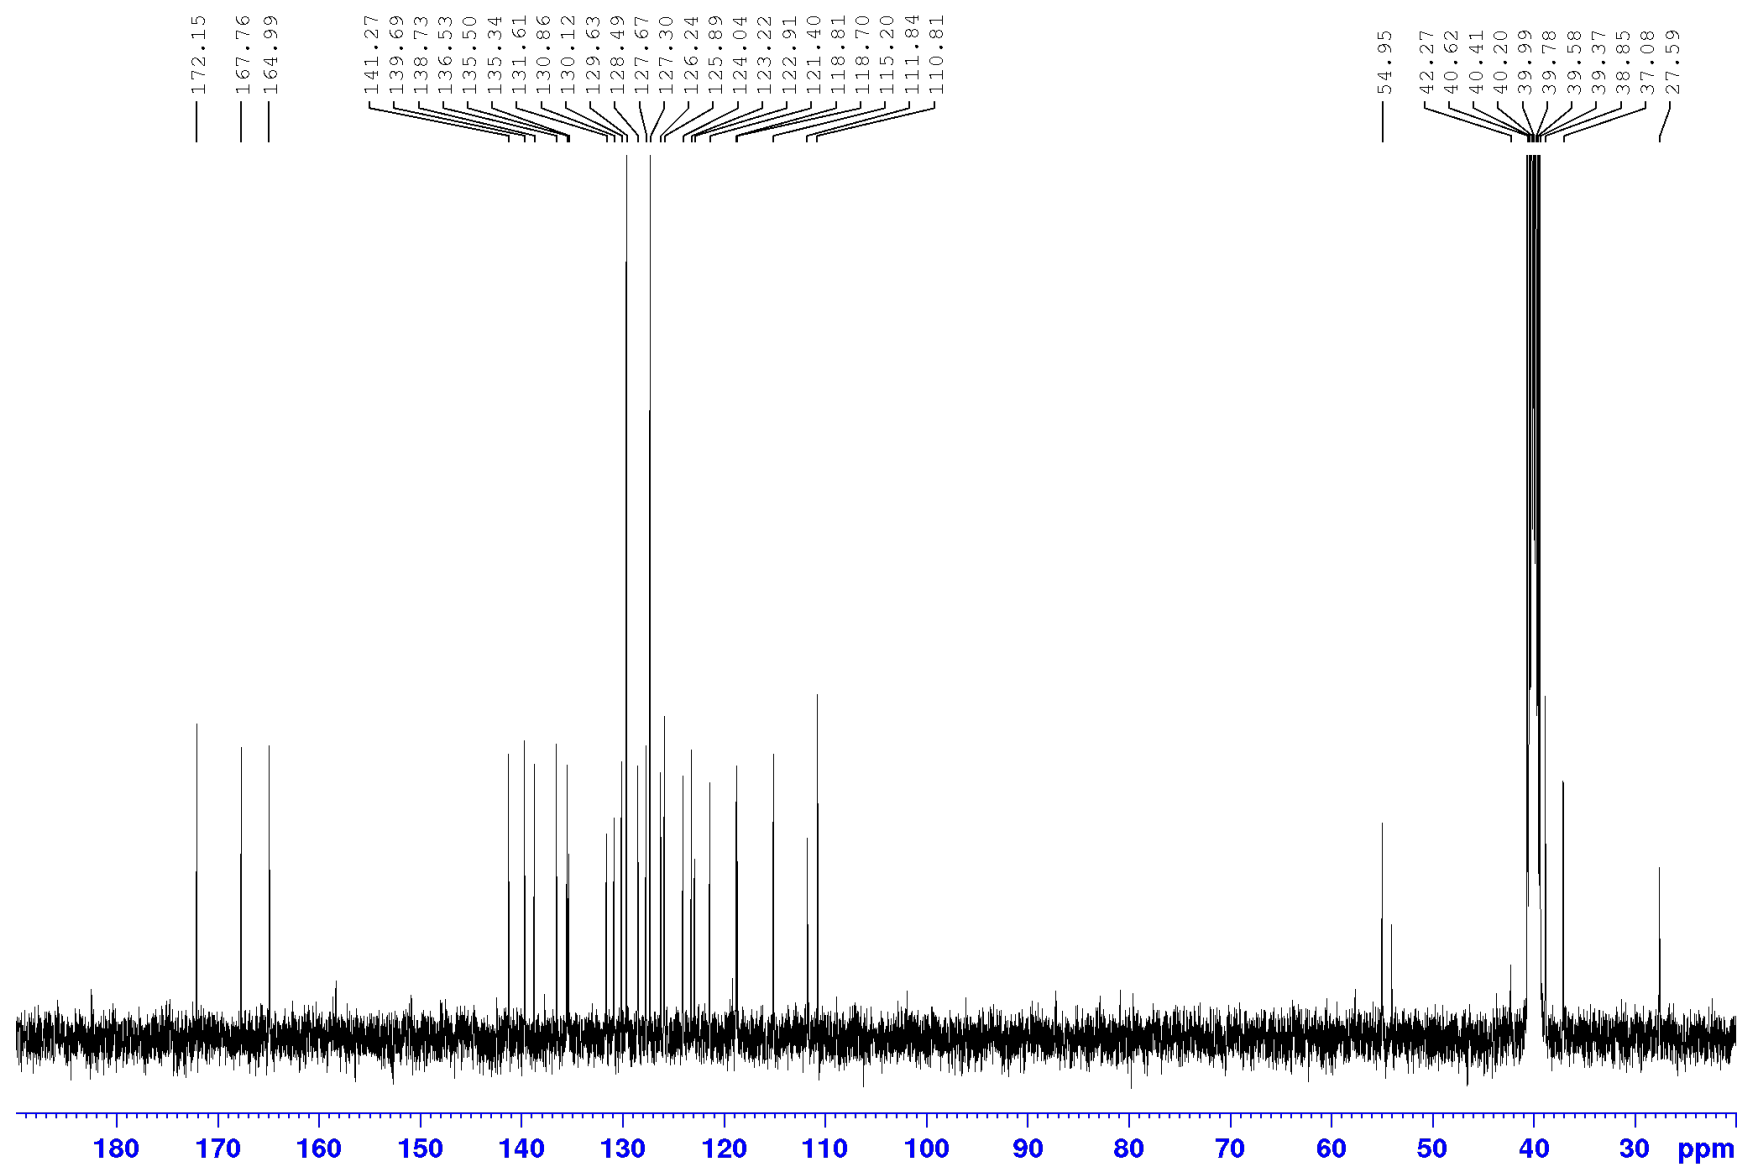

<sup>1</sup>H NMR of (S)-N-(2-((1-((2-aminoethyl)amino)-3-(1*H*-indol-3-yl)-1-oxopropan-2-yl)carbamoyl)-4-bromophenyl)-[1,1'-biphenyl]-4-carboxamide (12k)

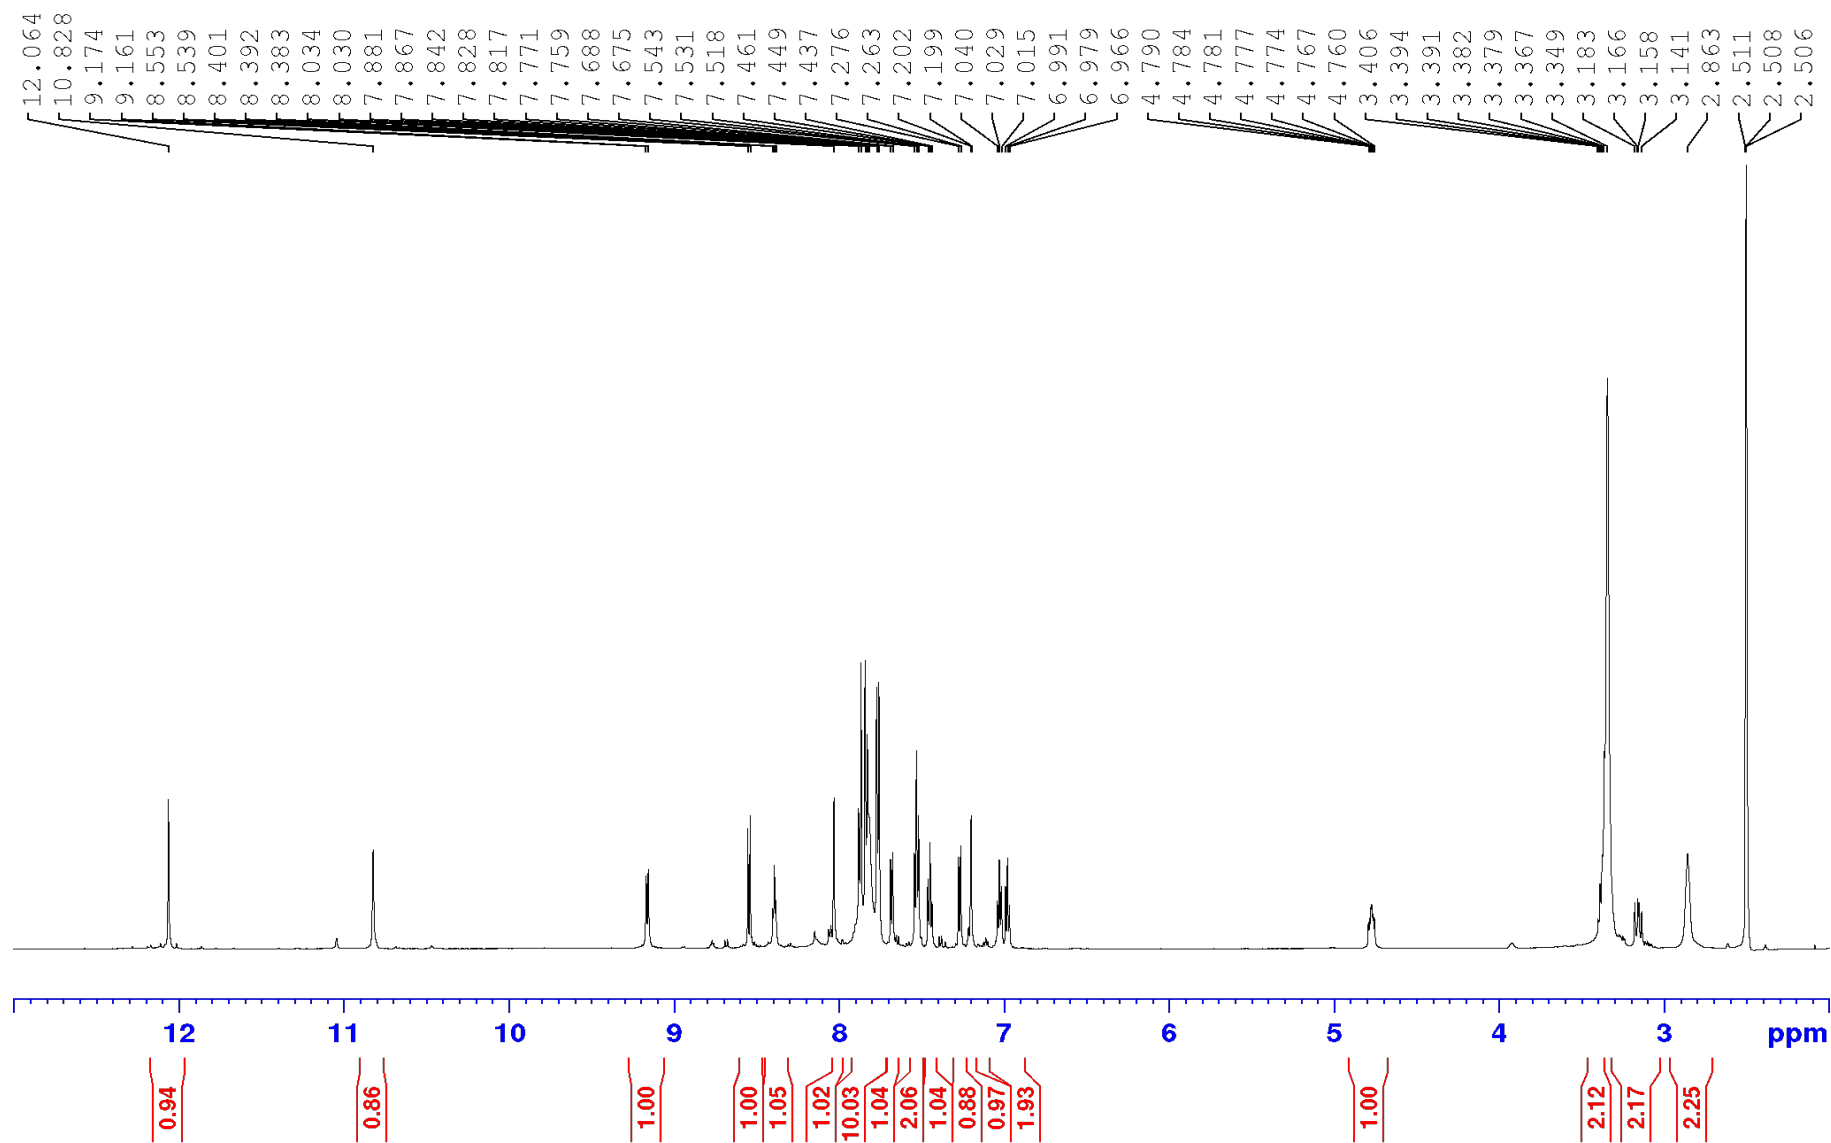

$^{13}\text{C}$  NMR of (S)-N-(2-((1-((2-aminoethyl)amino)-3-(1*H*-indol-3-yl)-1-oxopropan-2-yl)carbamoyl)-4-bromophenyl)-[1,1'-biphenyl]-4-carboxamide (12k)

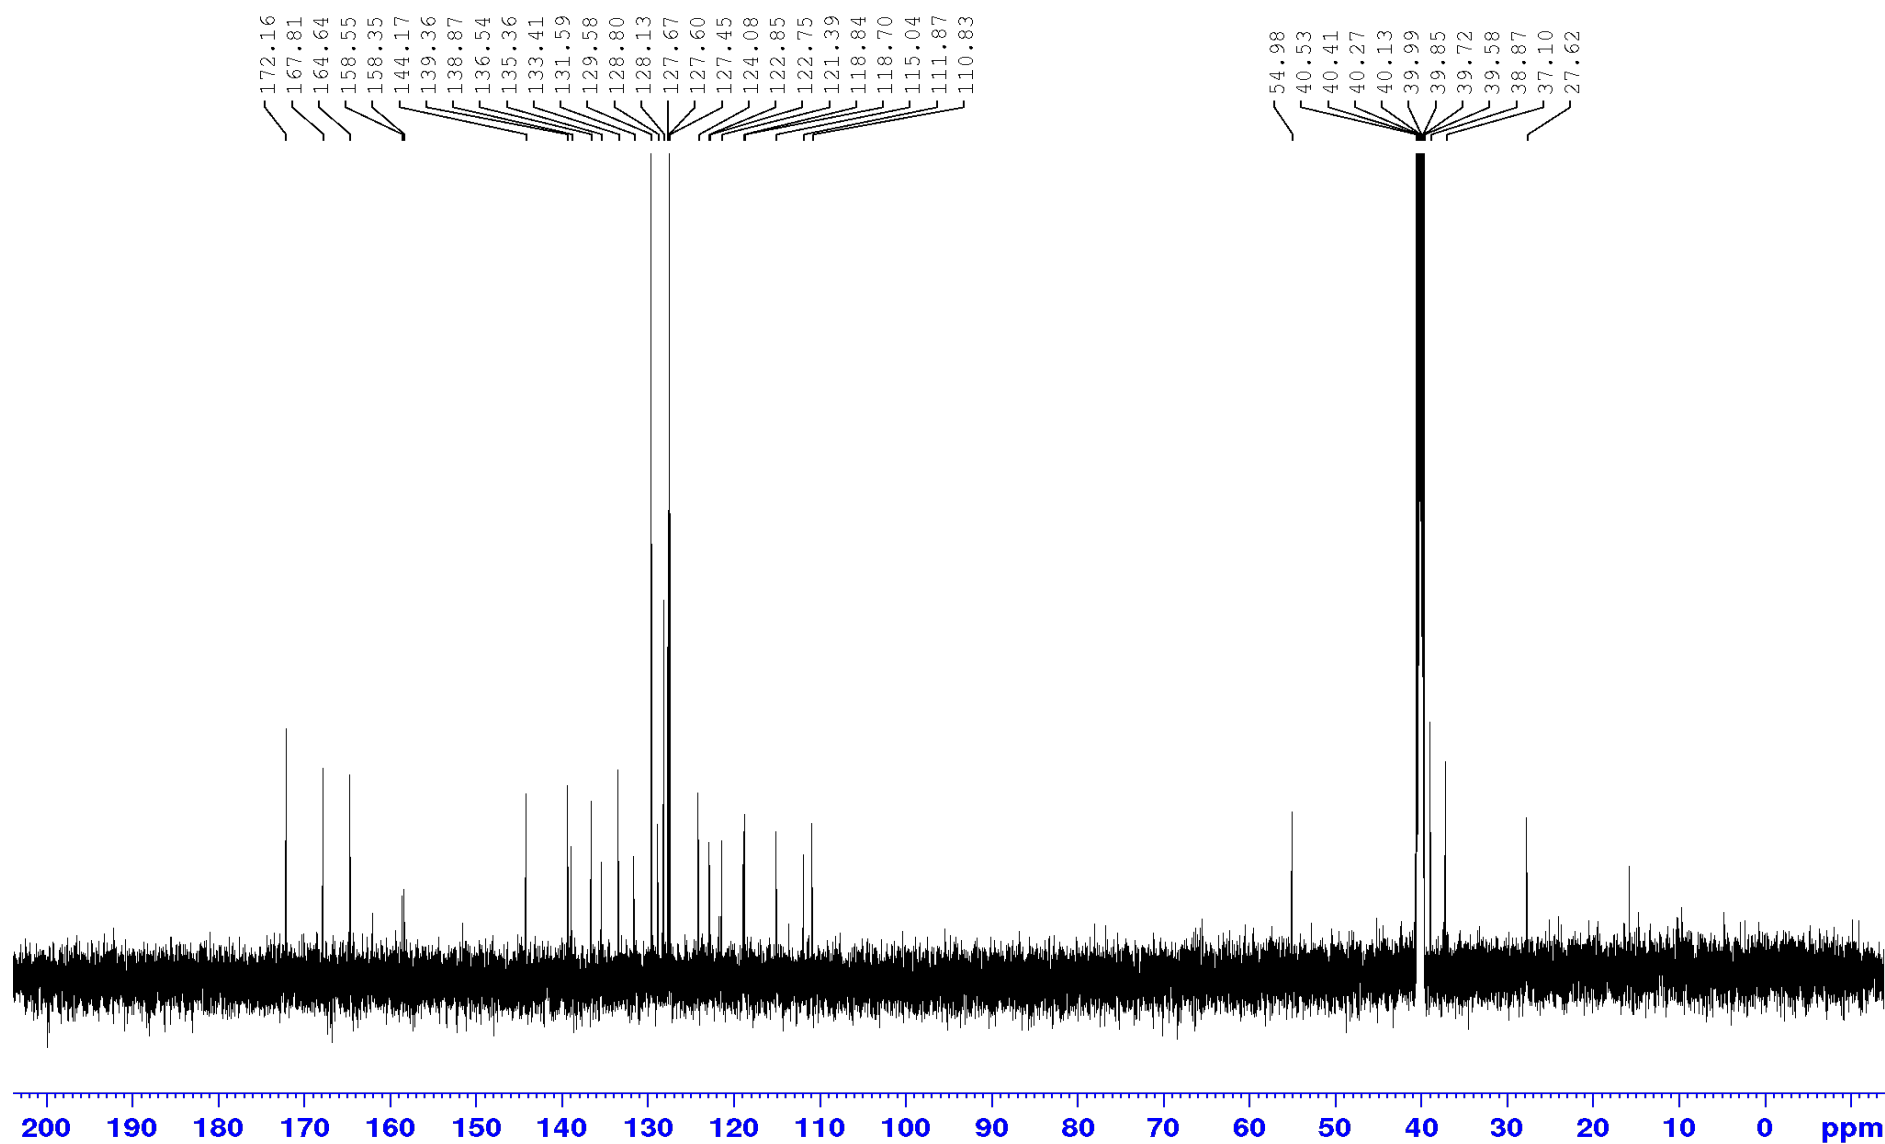

<sup>1</sup>H NMR of (S)-N-(1-((3-aminopropyl)amino)-3-(1H-indol-3-yl)-1-oxopropan-2-yl)-5-bromo-2-(2-(naphthalen-1-yl)acetamido)benzamide (13b)

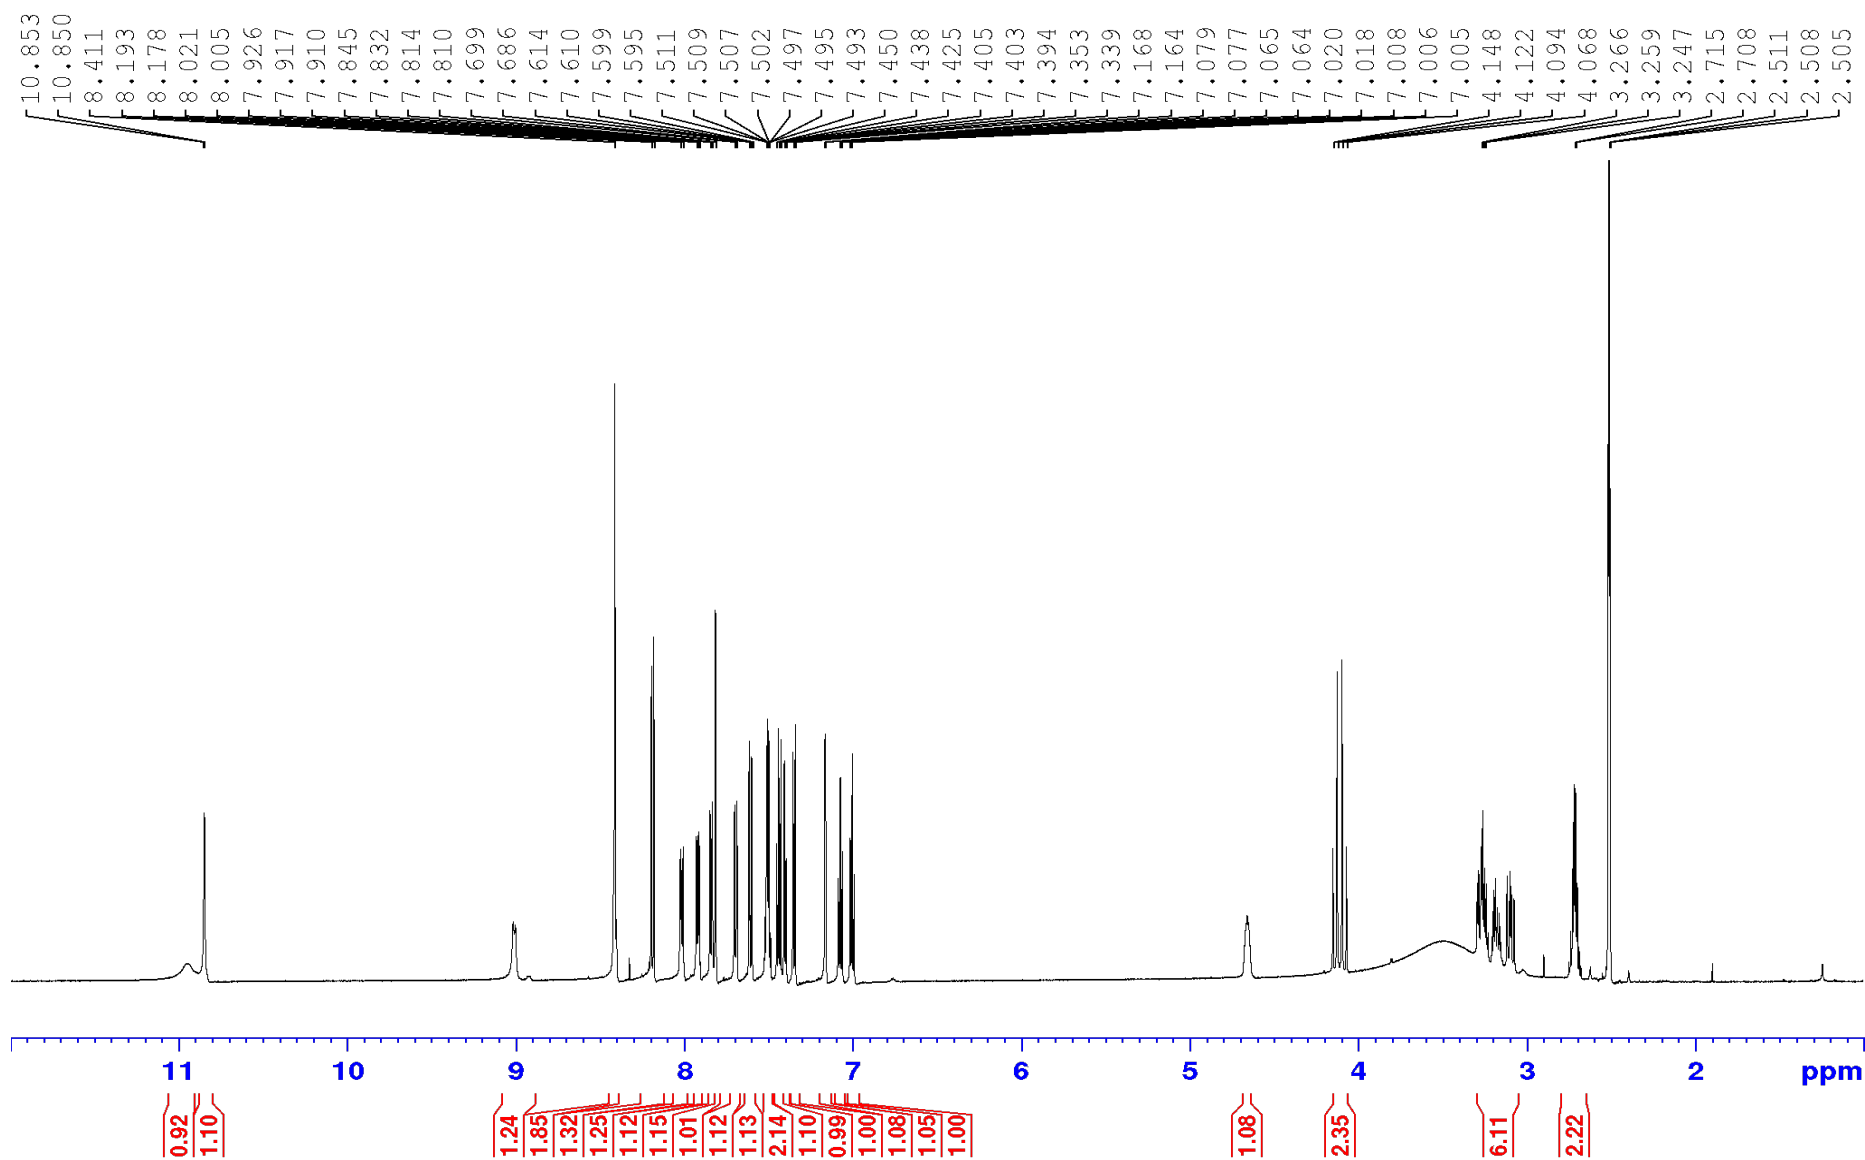

$^{13}\text{C}$  NMR of (S)-N-(1-((3-aminopropyl)amino)-3-(1*H*-indol-3-yl)-1-oxopropan-2-yl)-5-bromo-2-(2-(naphthalen-1-yl)acetamido)benzamide (13b)

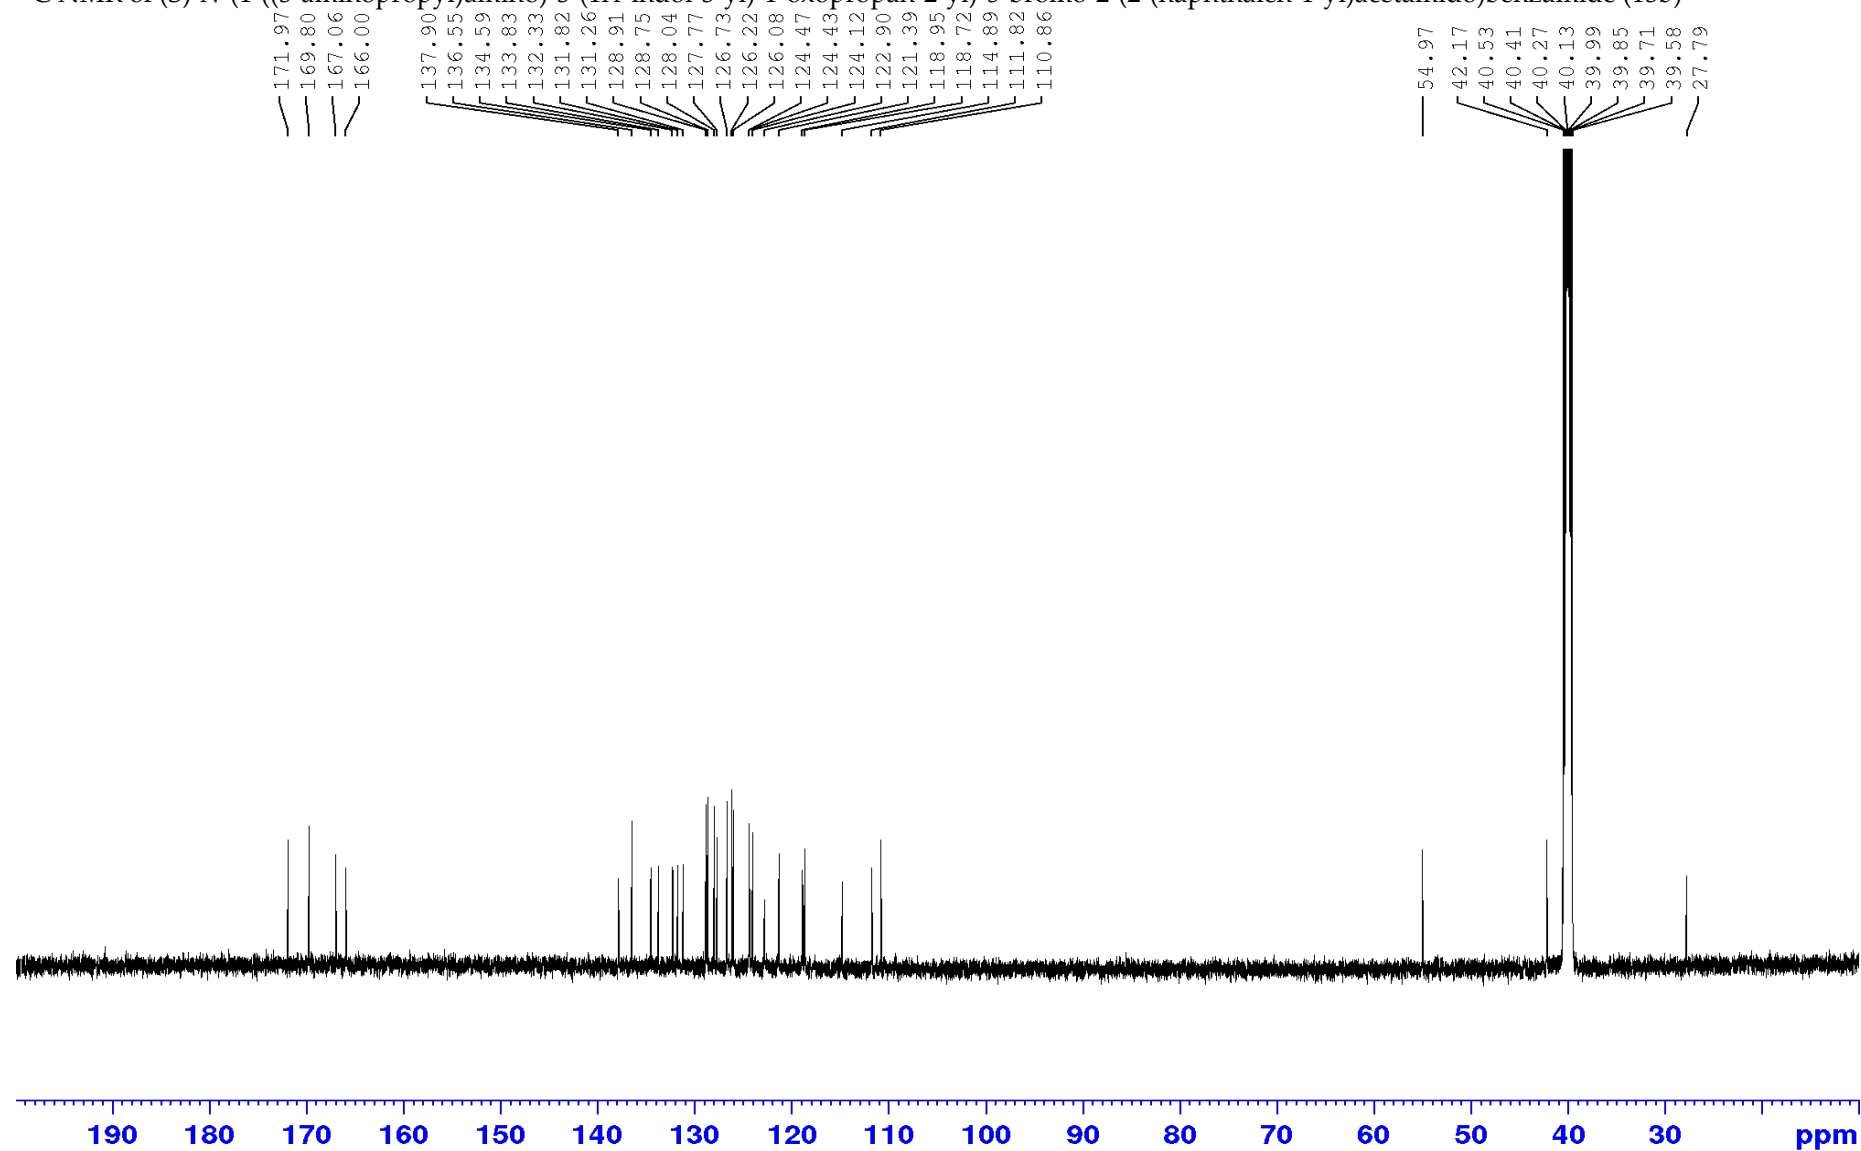

<sup>1</sup>H NMR of (S)-N-(2-((1-((3-aminopropyl)amino)-3-(1*H*-indol-3-yl)-1-oxopropan-2-yl)carbamoyl)-4-bromophenyl)-2-methoxy-1-naphthamide (13c)

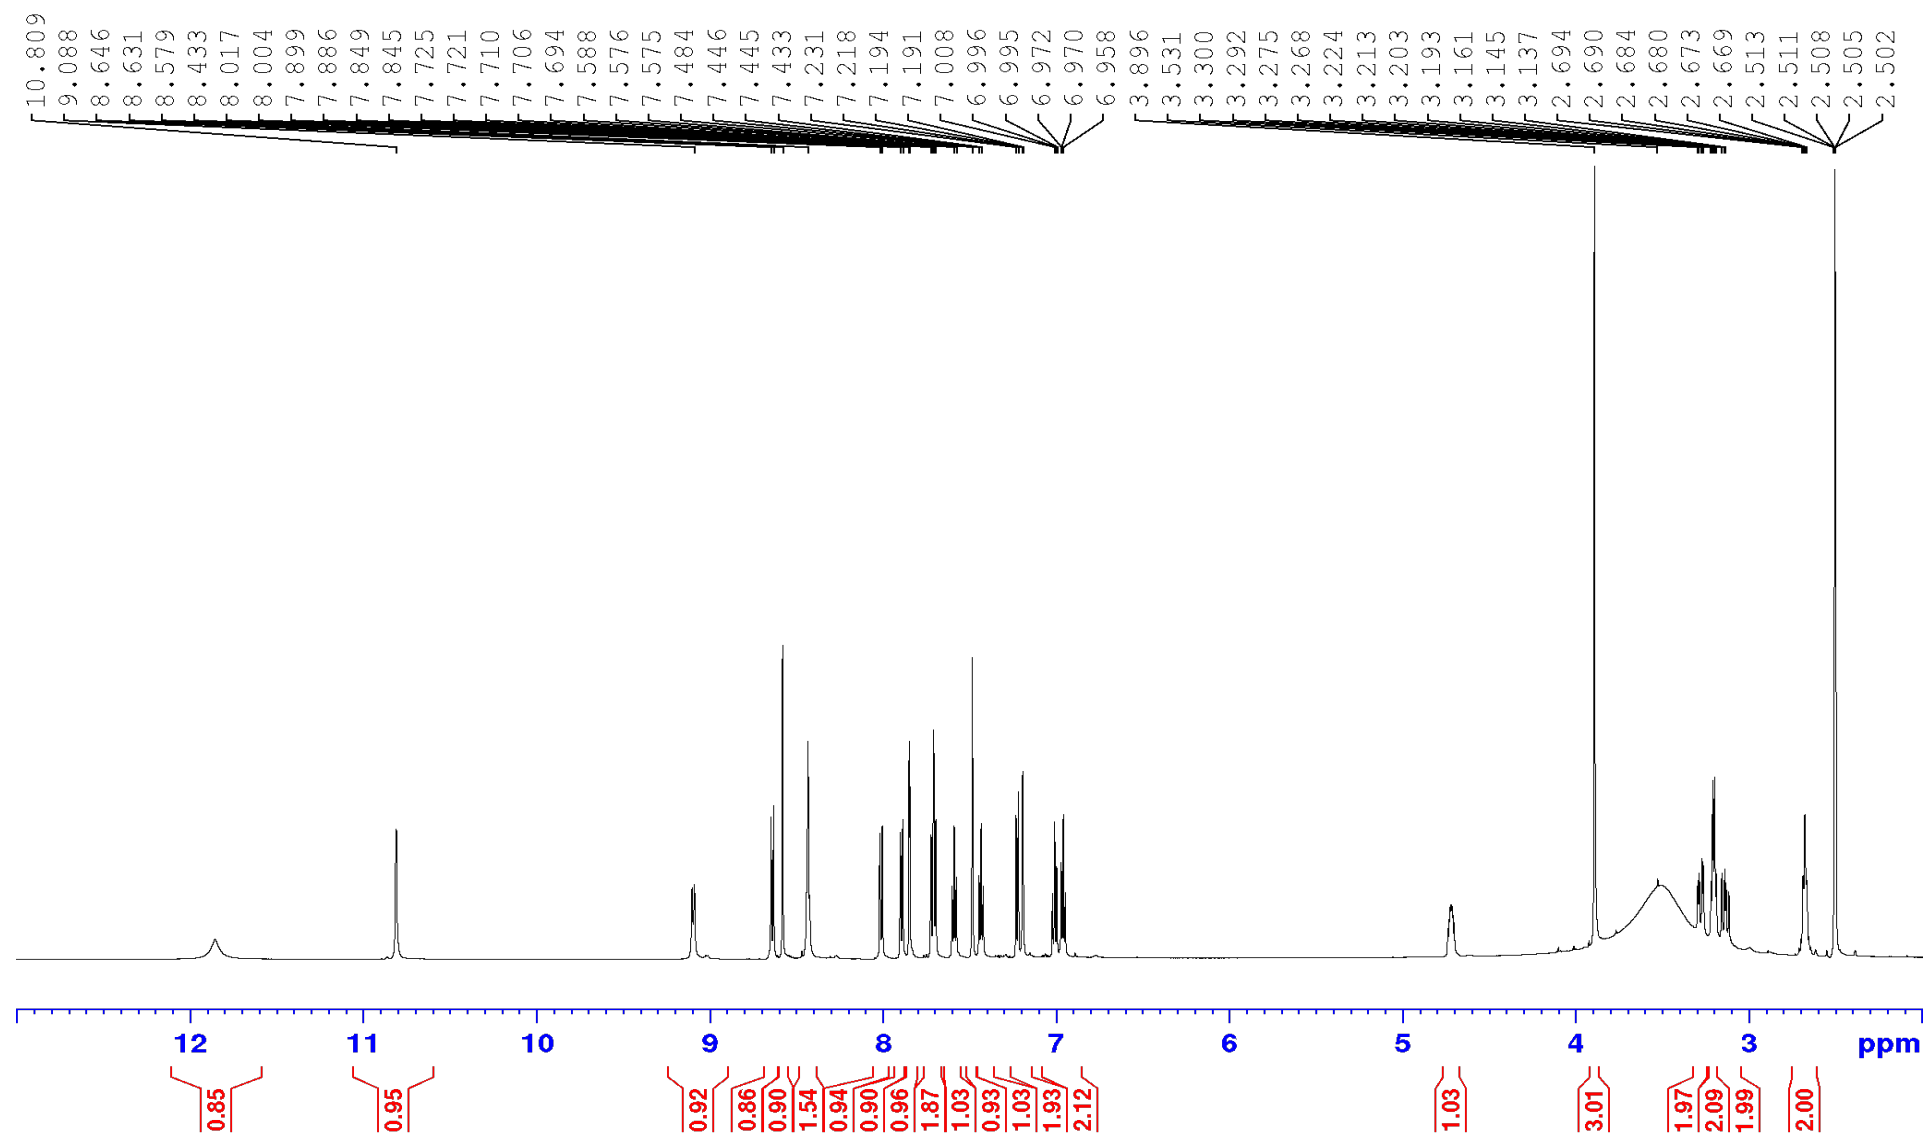



$^{13}\text{C}$  NMR of (S)-N-(2-((1-((3-aminopropyl)amino)-3-(1*H*-indol-3-yl)-1-oxopropan-2-yl)carbamoyl)-4-bromophenyl)-2-methoxy-1-naphthamide (13c)

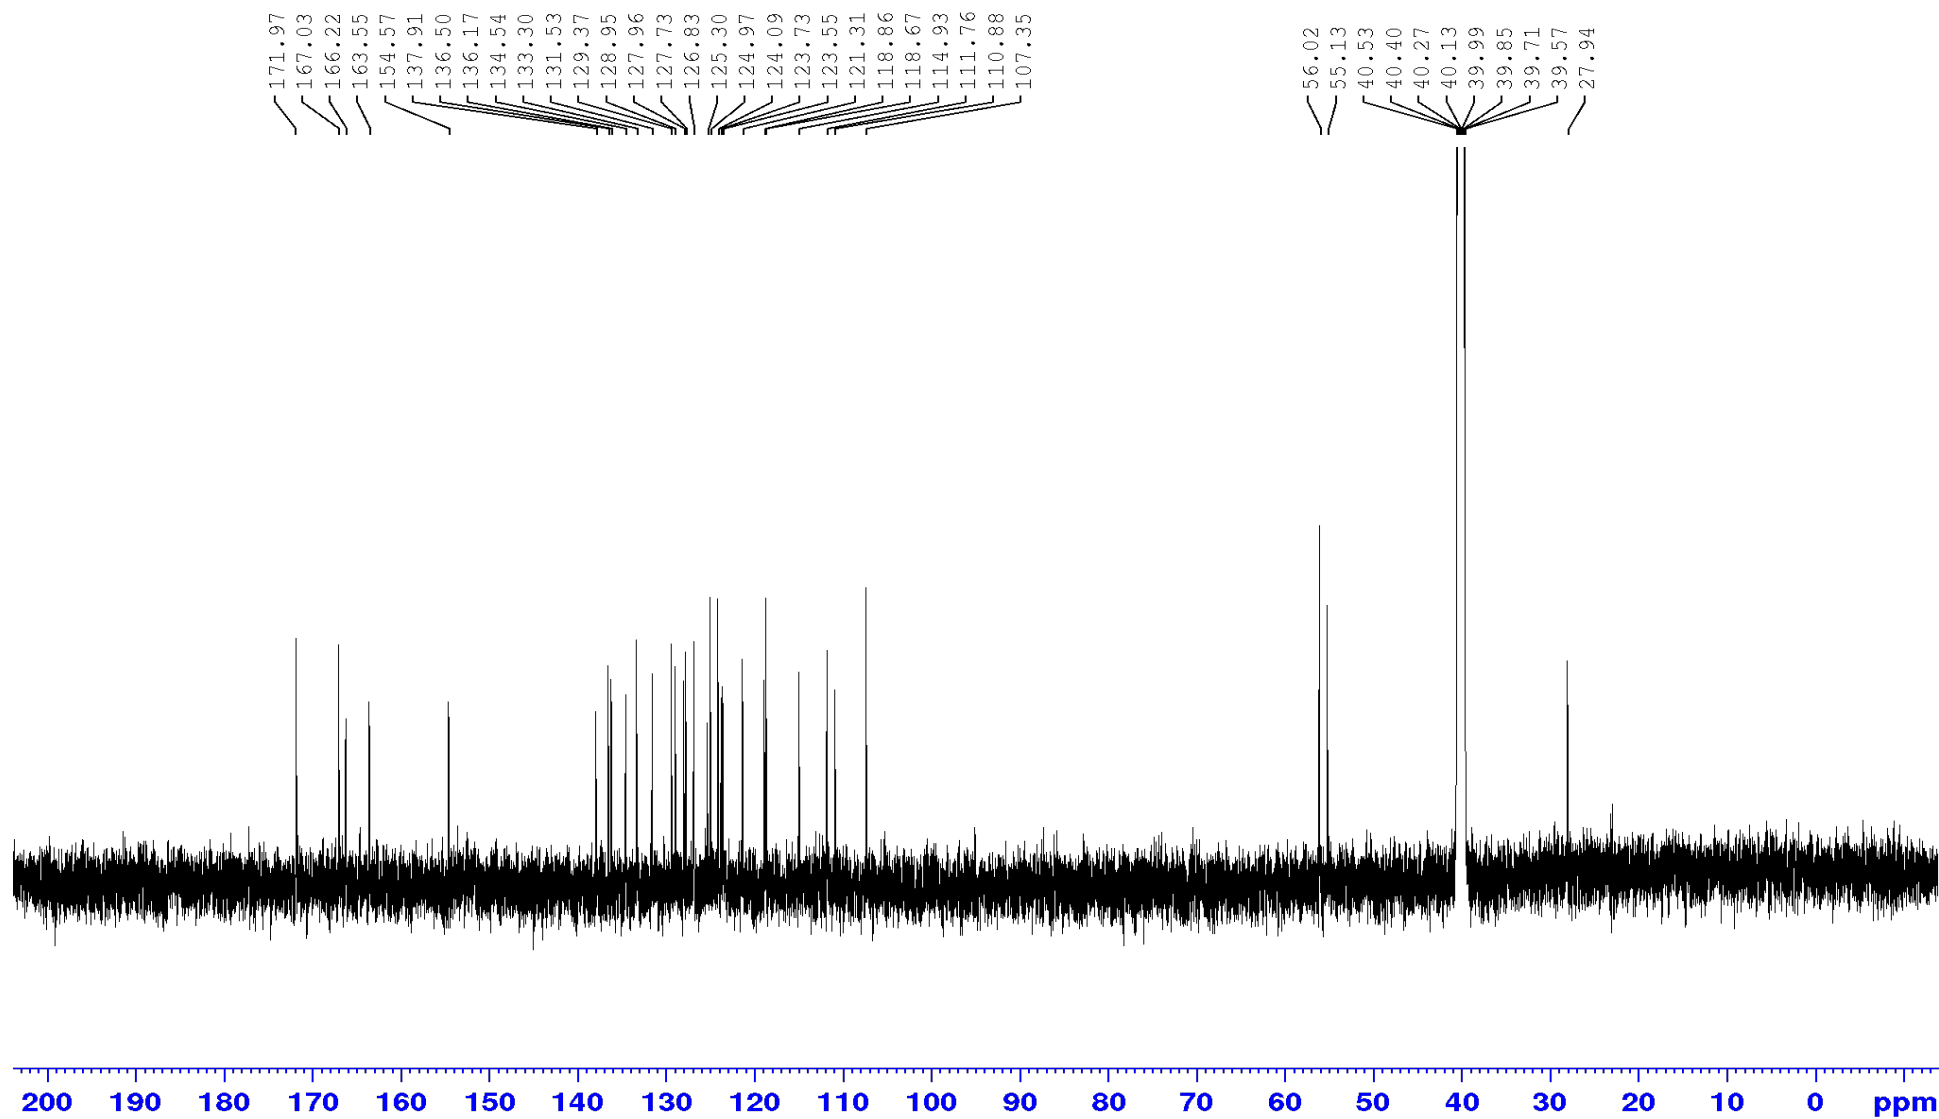

<sup>1</sup>H NMR of (S)-N-(2-((1-((3-aminopropyl)amino)-3-(1*H*-indol-3-yl)-1-oxopropan-2-yl)carbamoyl)-4-bromophenyl)-3-methoxy-2-naphthamide (13d)

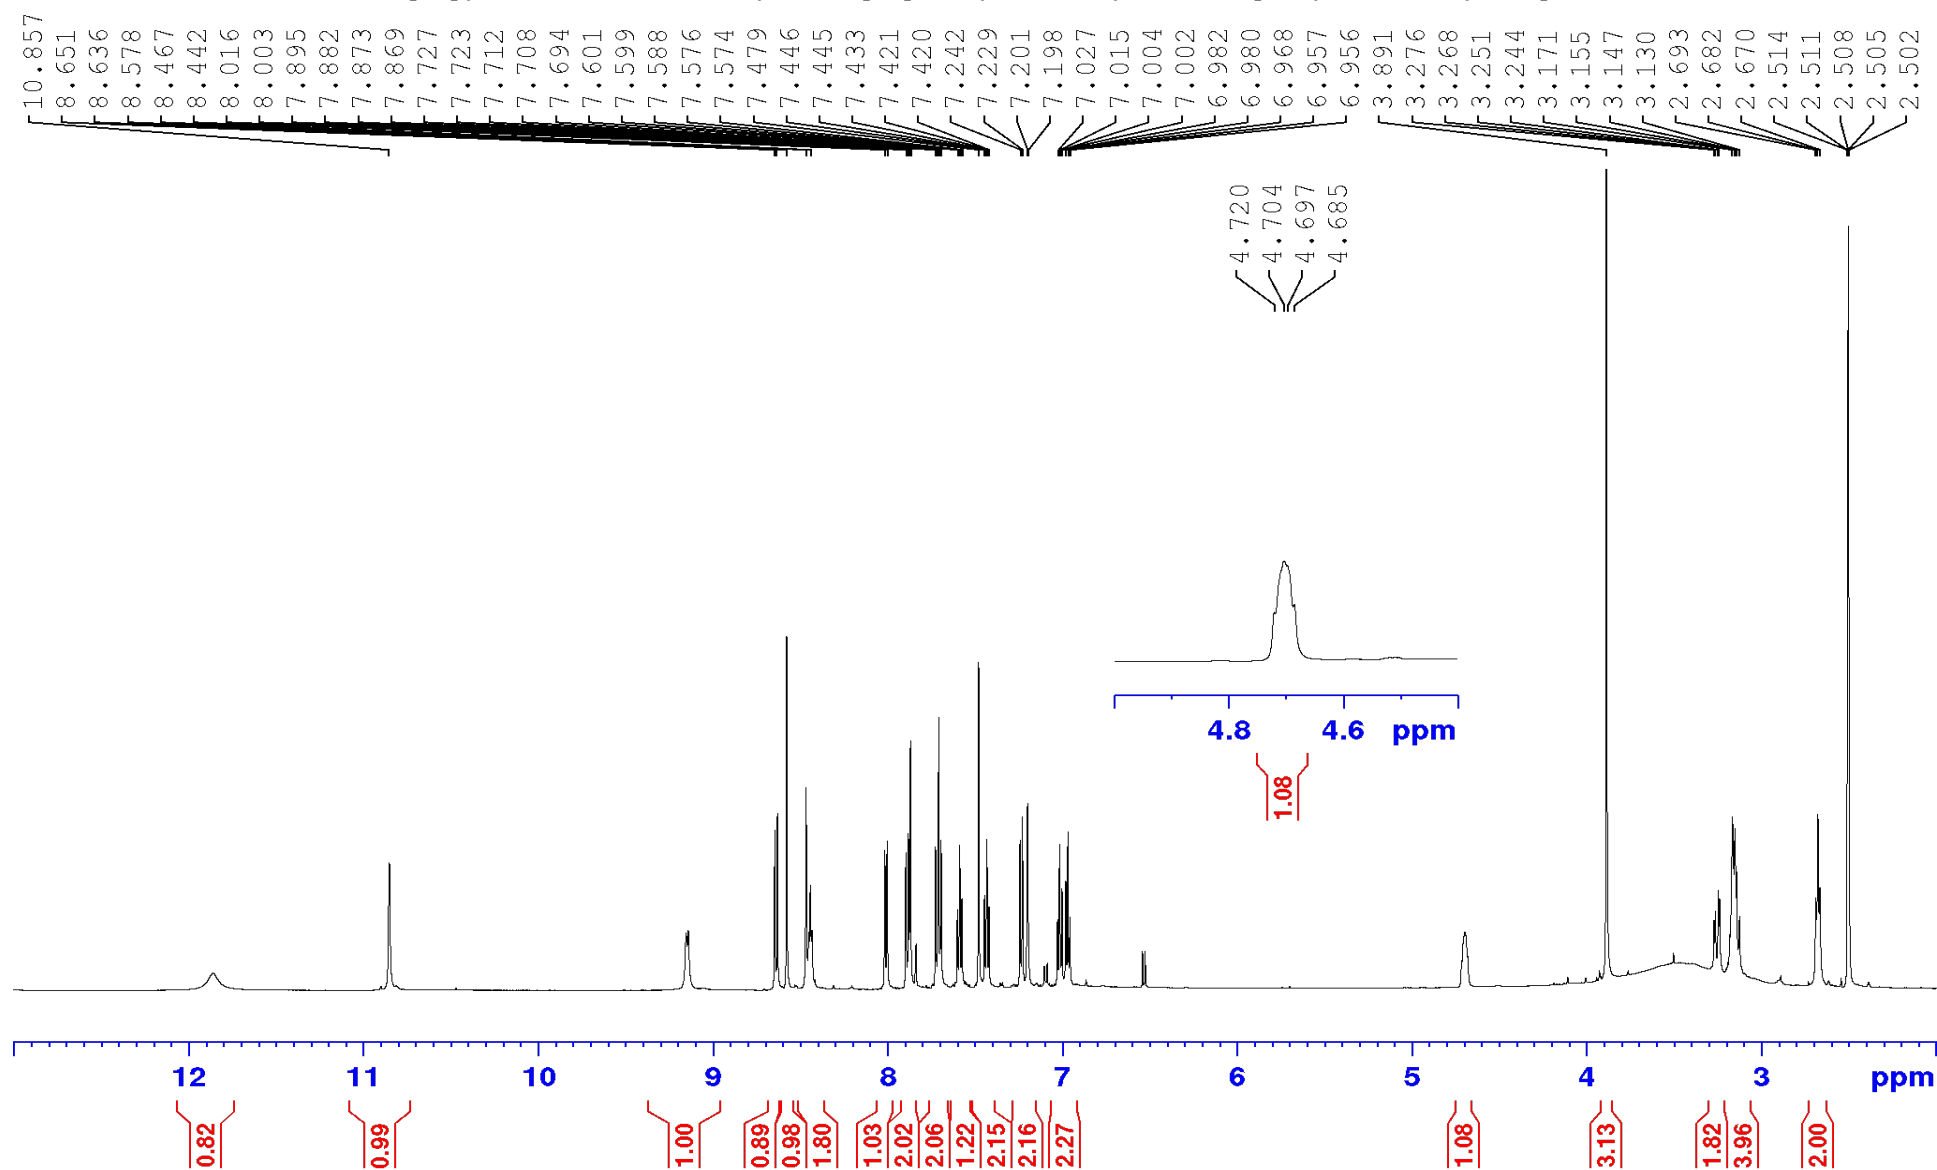

$^{13}\text{C}$  NMR of (S)-N-(2-((1-((3-aminopropyl)amino)-3-(1*H*-indol-3-yl)-1-oxopropan-2-yl)carbamoyl)-4-bromophenyl)-3-methoxy-2-naphthamide (13d)

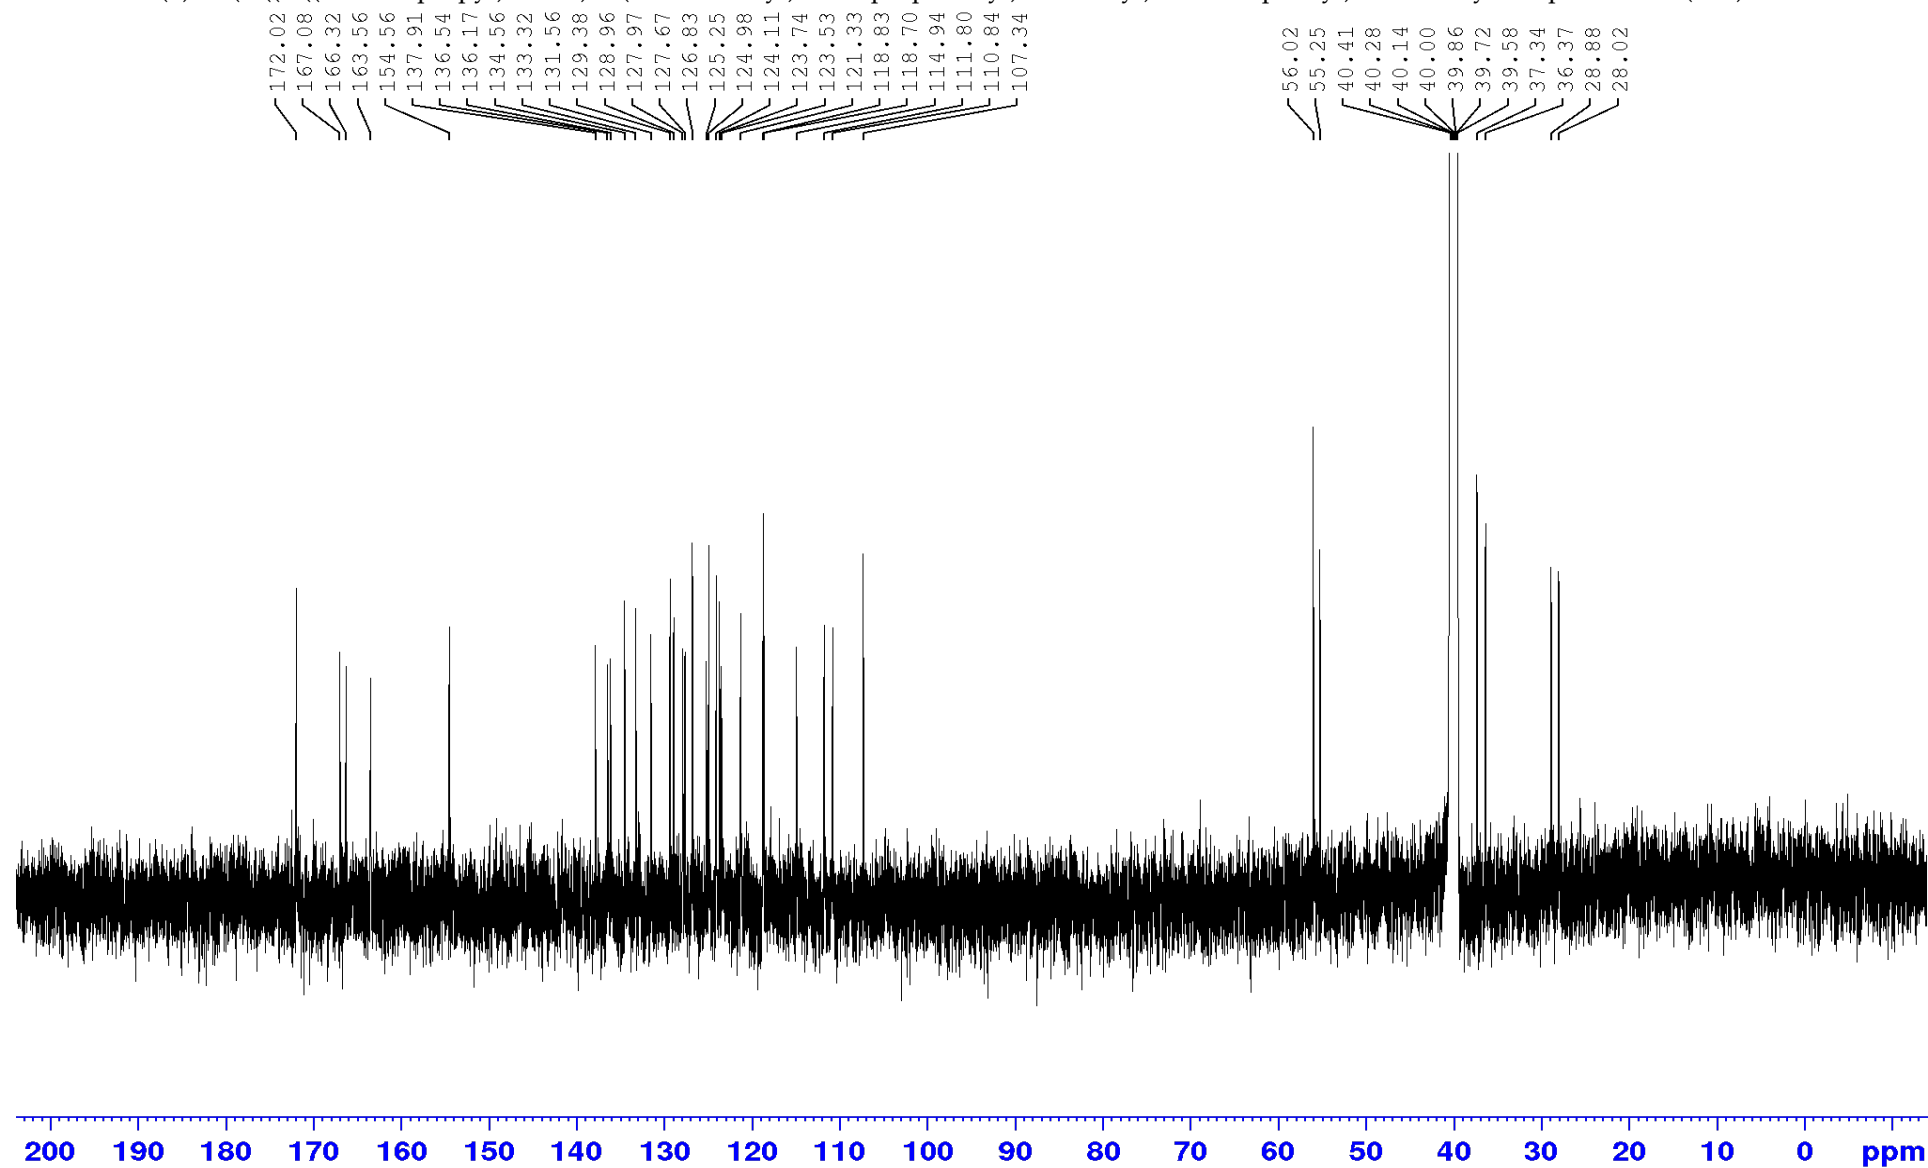

<sup>1</sup>H NMR of (S)-N-(2-((1-((3-aminopropyl)amino)-3-(1*H*-indol-3-yl)-1-oxopropan-2-yl)carbamoyl)-4-bromophenyl)quinoline-2-carboxamide (13e)

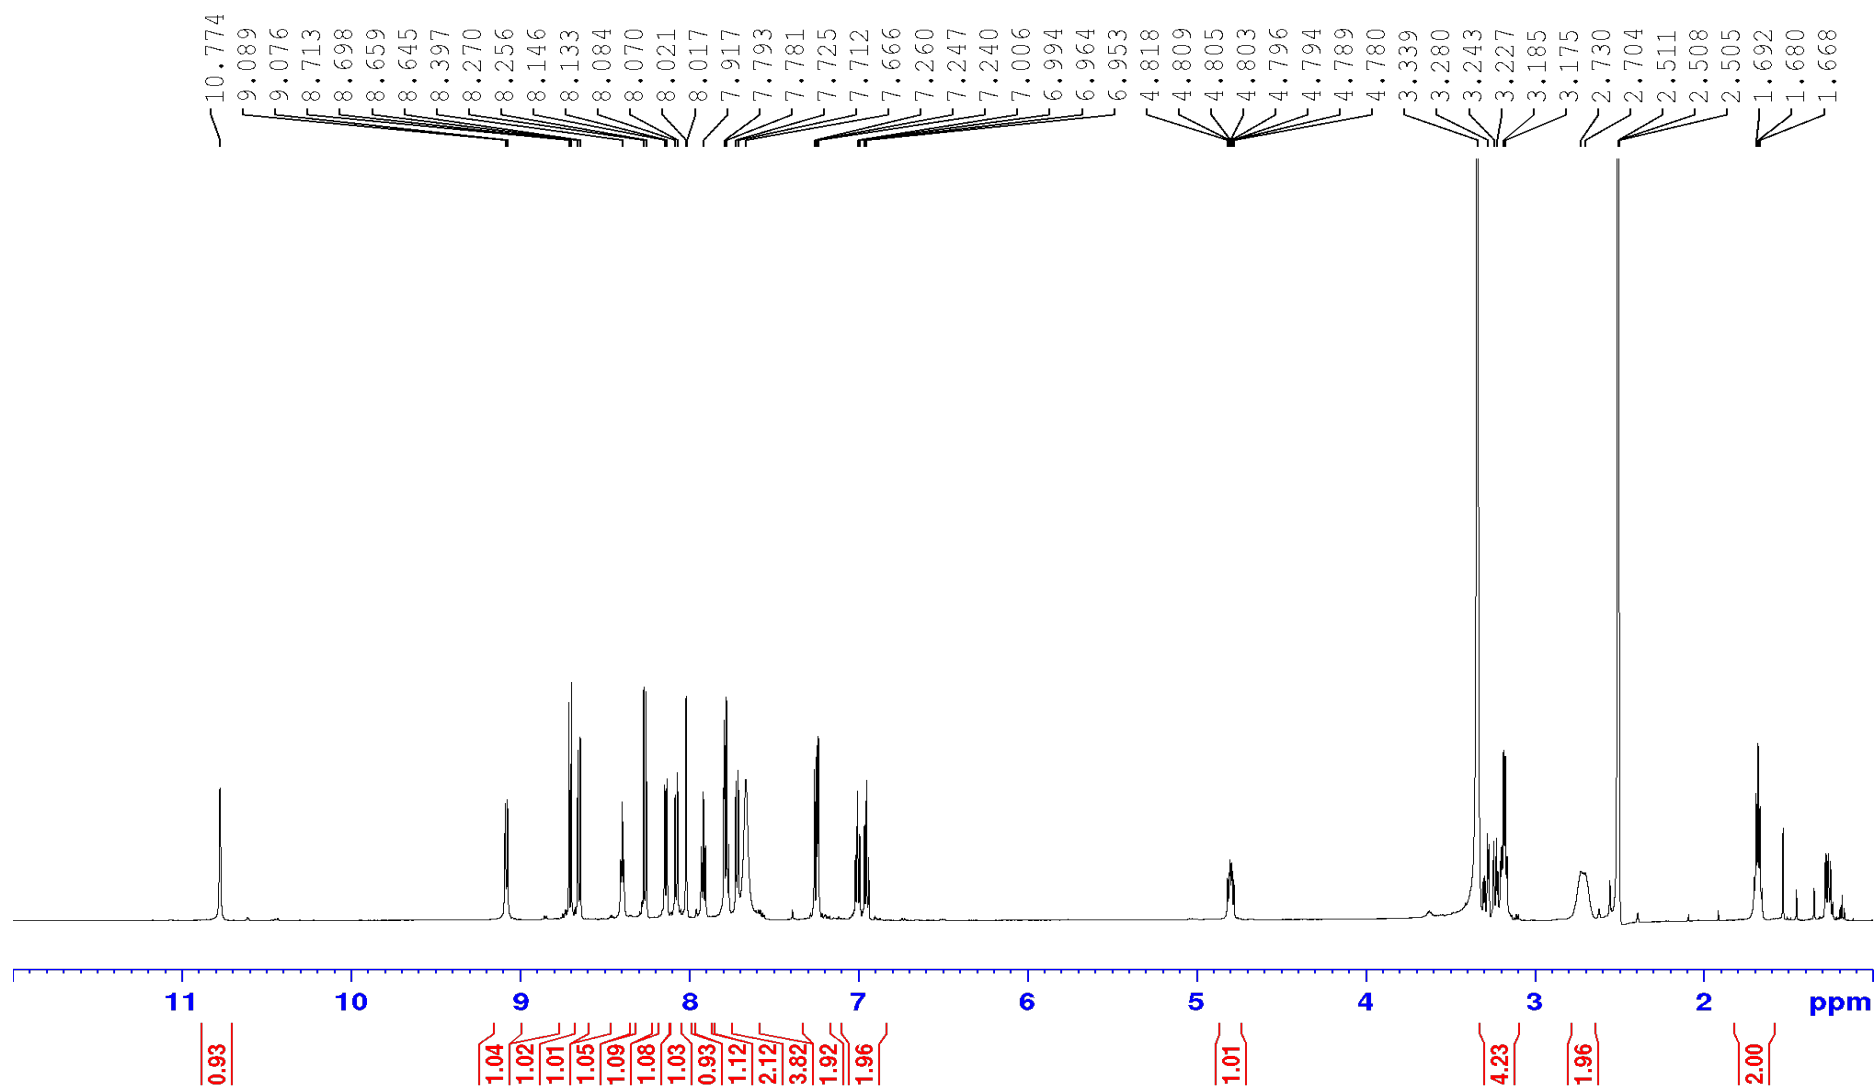

$^{13}\text{C}$  NMR of (S)-N-(2-((1-((3-aminopropyl)amino)-3-(1*H*-indol-3-yl)-1-oxopropan-2-yl)carbamoyl)-4-bromophenyl)quinoline-2-carboxamide (13e)

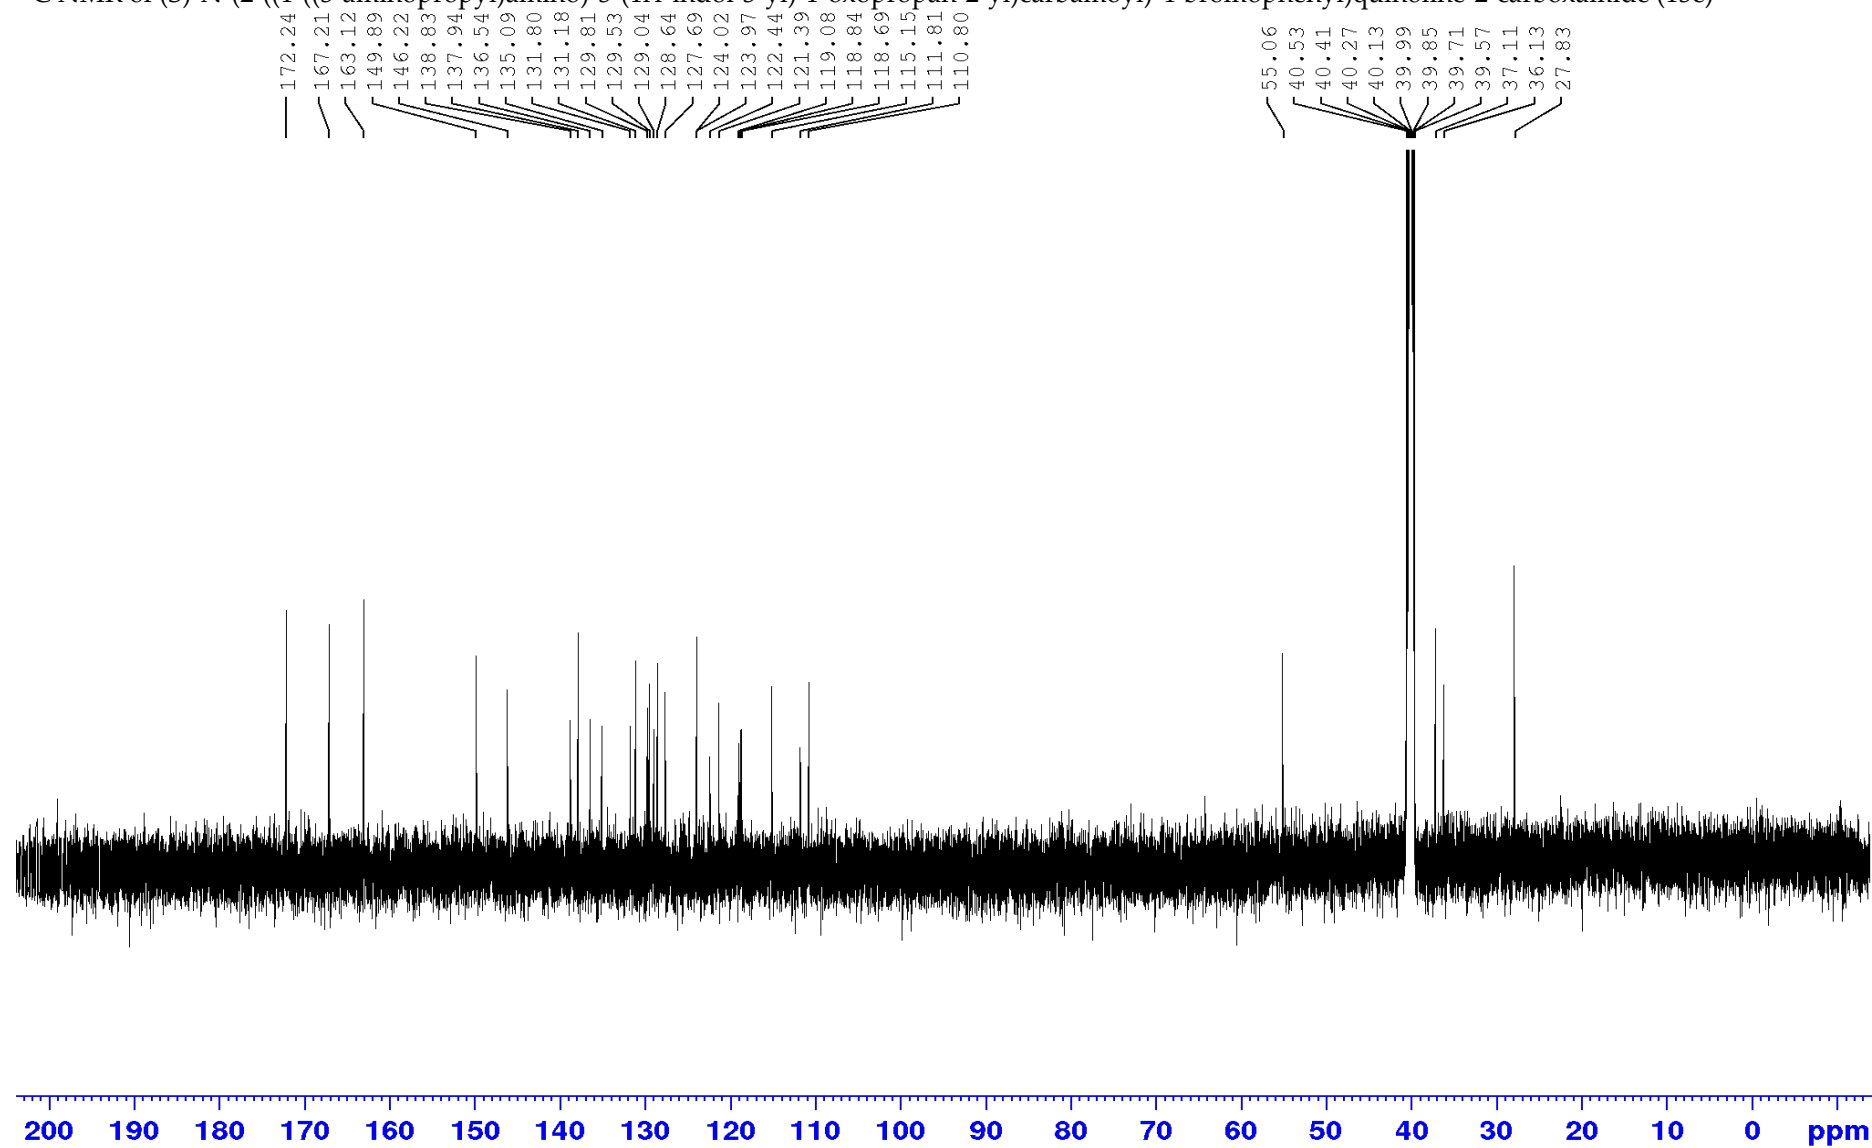

<sup>1</sup>H NMR of *tert*-butyl (S)-(2-(2-(4-amino-4'-(*tert*-butyl)-[1,1'-biphenyl]-3-carboxamido)-3-(1*H*-indol-3-yl)propanamido)ethyl)carbamate (15a)

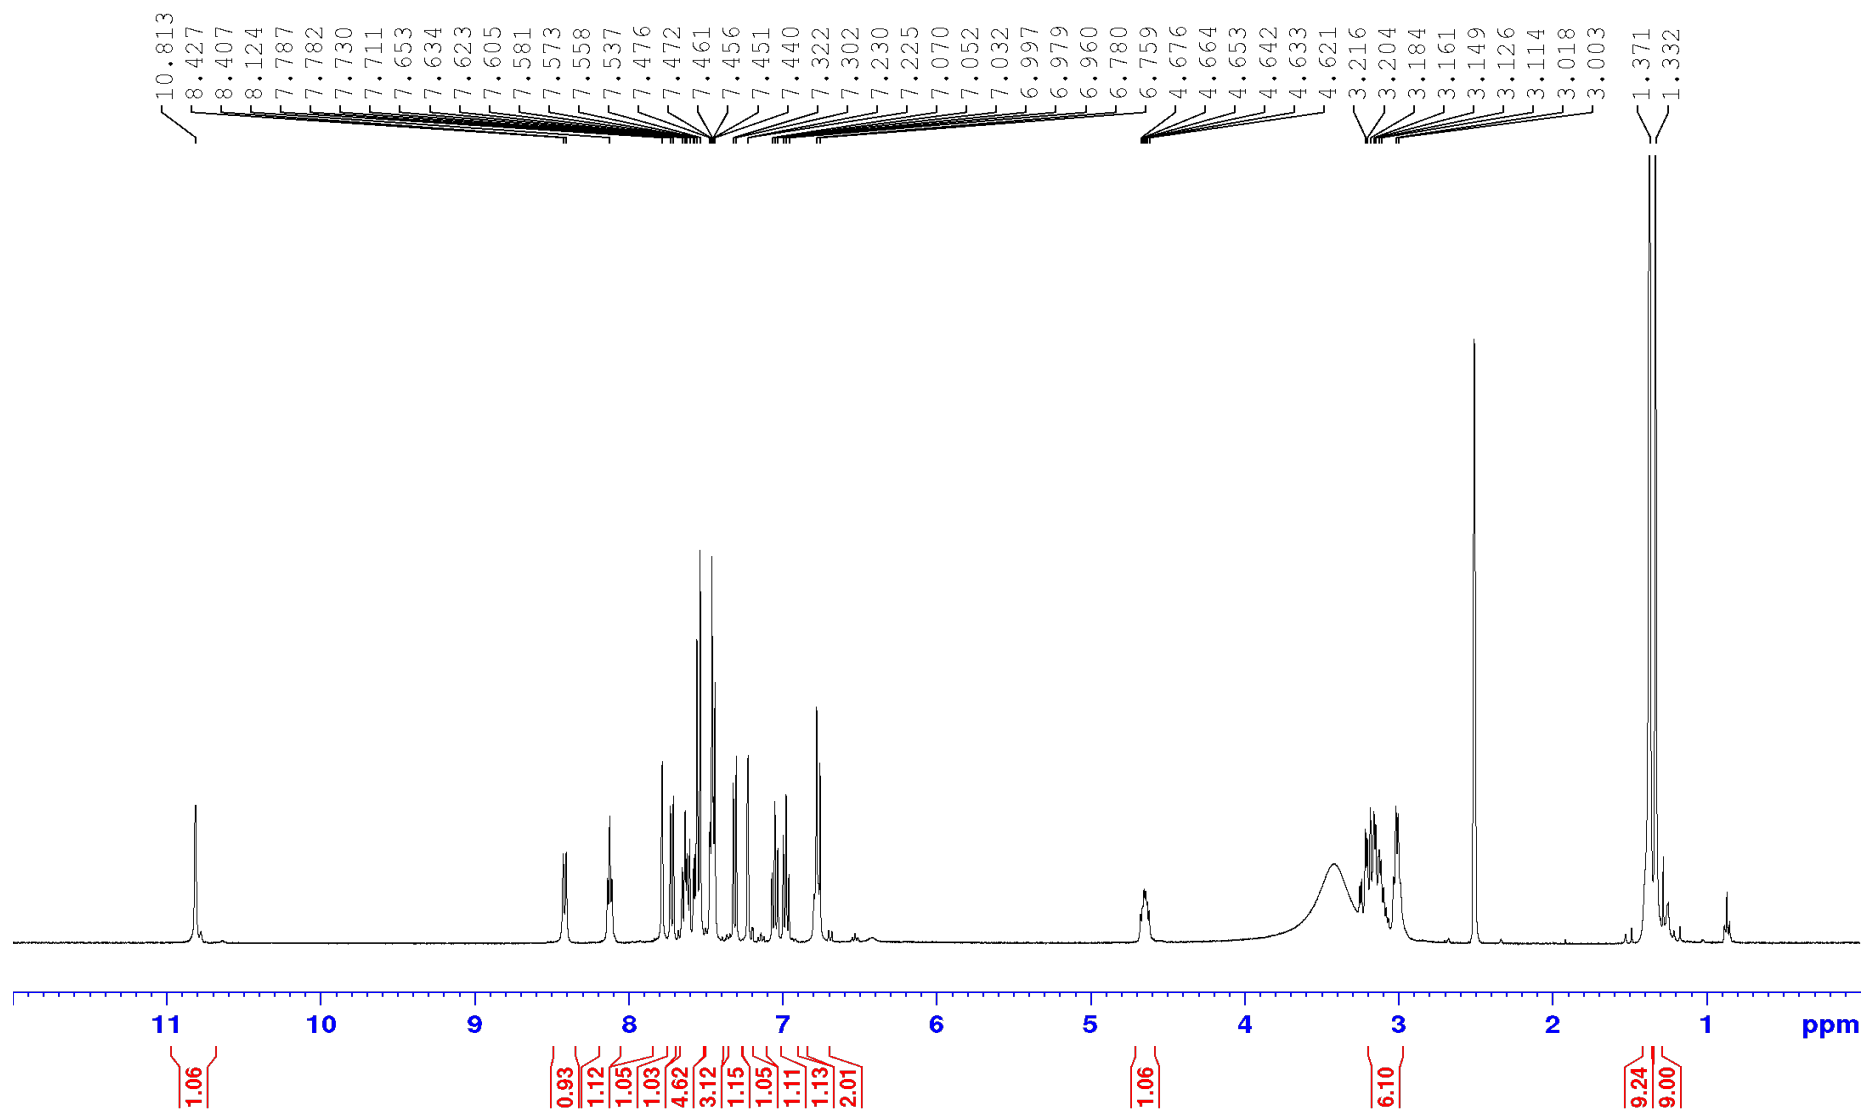

$^{13}\text{C}$  NMR of *tert*-butyl (S)-(2-(2-(4-amino-4'-(*tert*-butyl)-[1,1'-biphenyl]-3-carboxamido)-3-(1*H*-indol-3-yl)propanamido)ethyl)carbamate (15a)

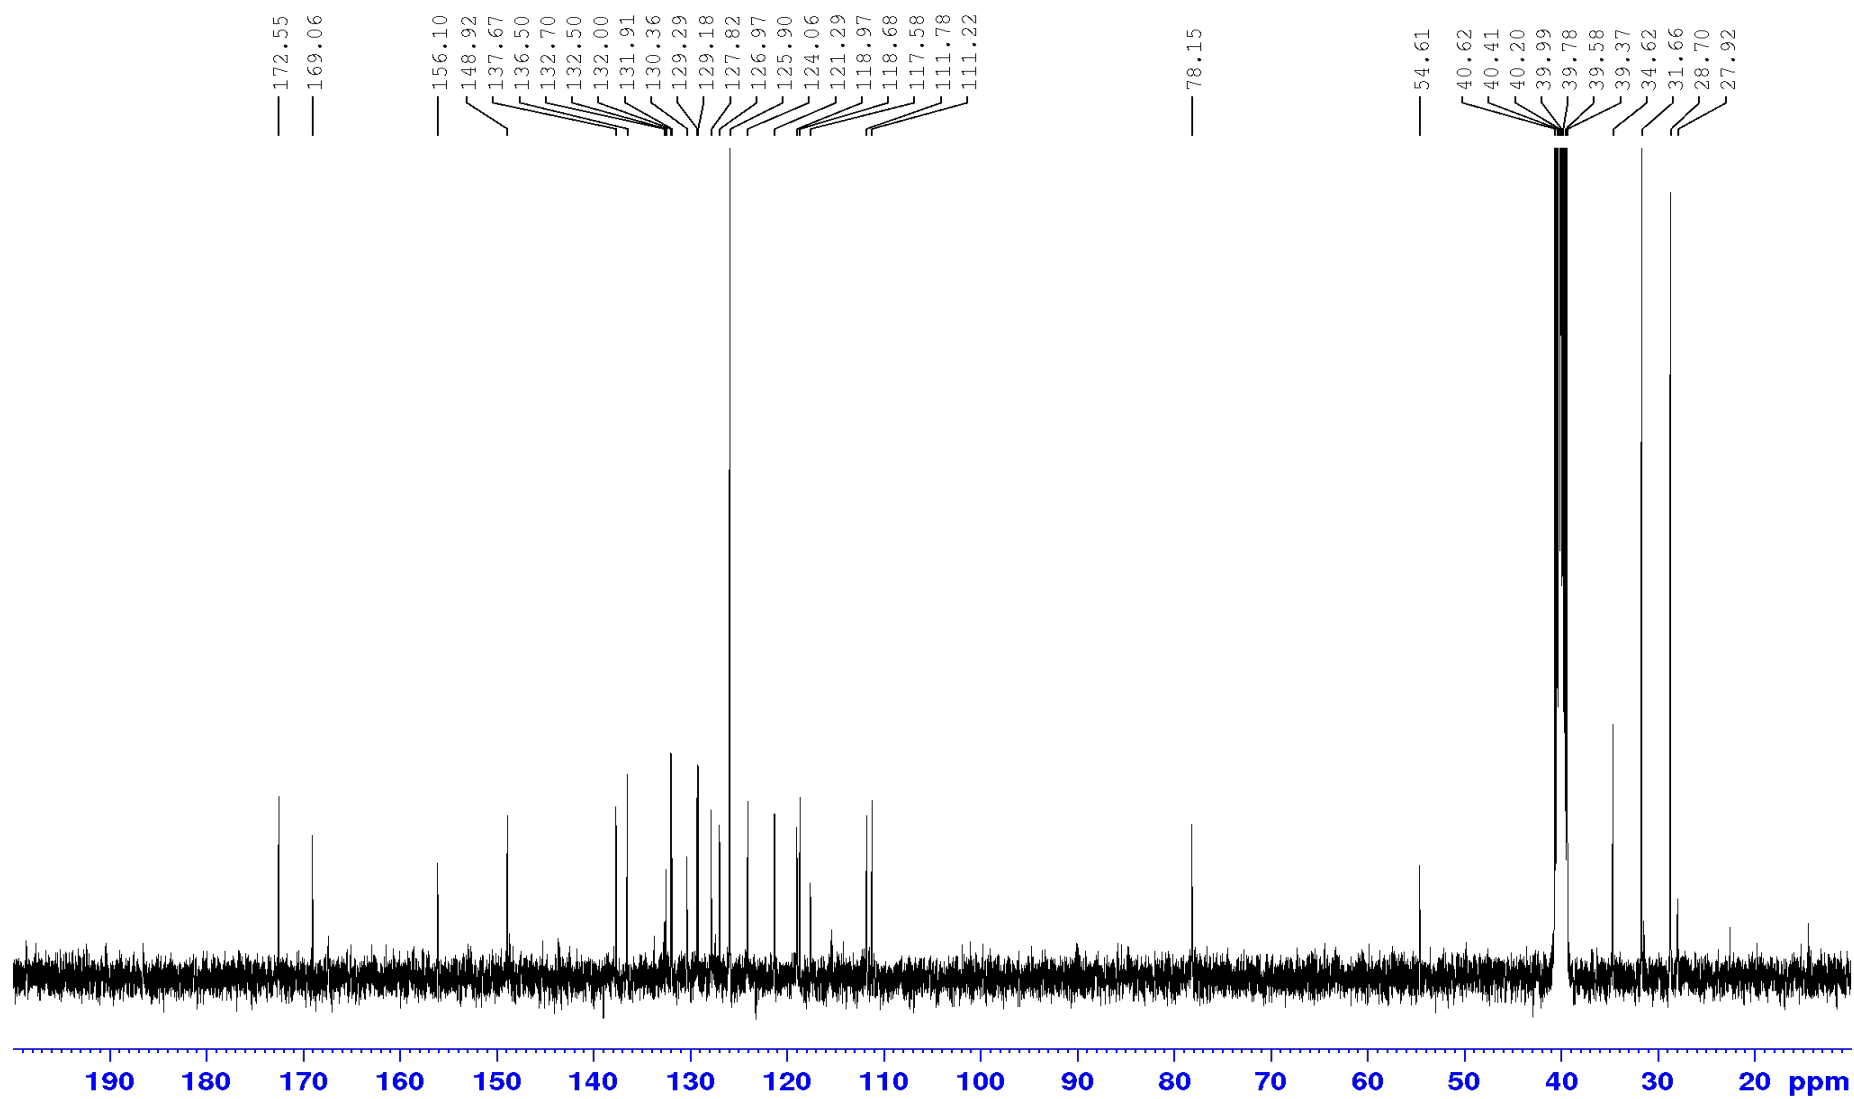

$^1\text{H}$  NMR of *tert*-butyl (S)-(2-(2-(2-amino-5-(naphthalen-2-yl)benzamido)-3-(1H-indol-3-yl)propanamido)ethyl)carbamate (15b)

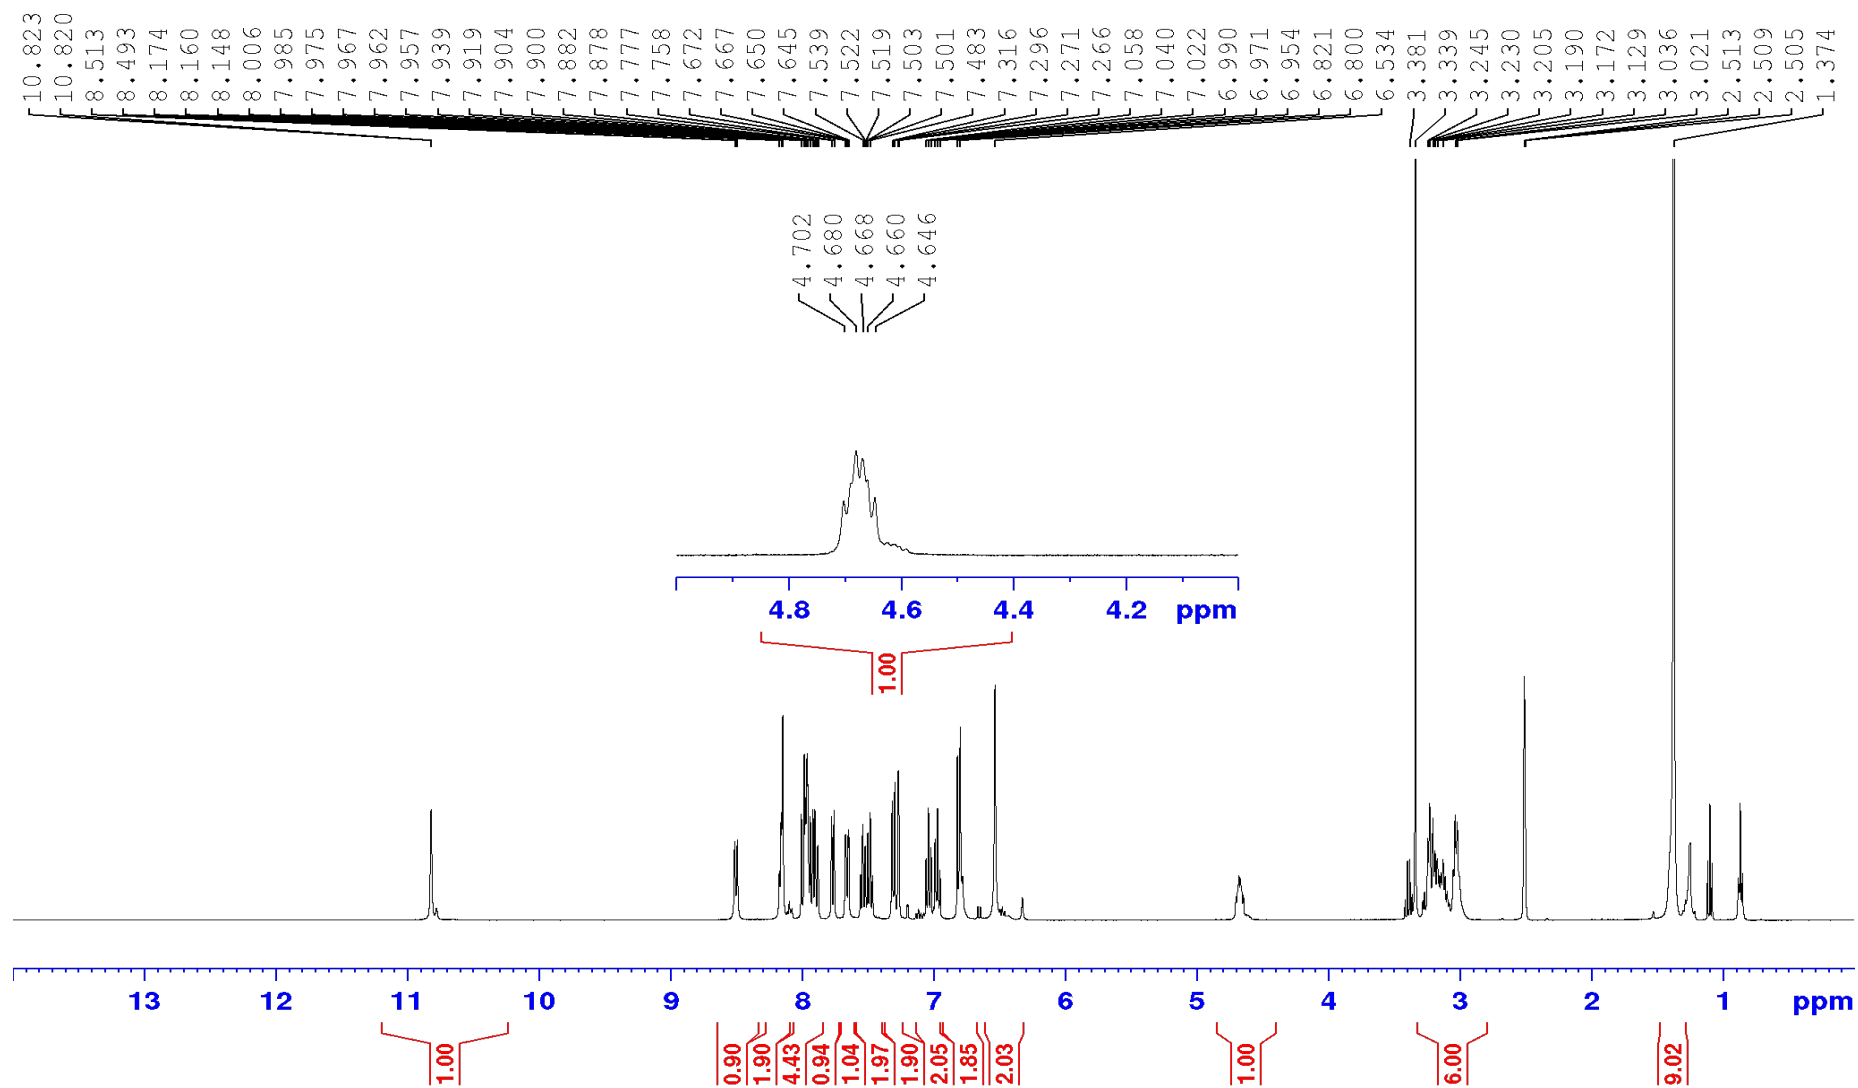



$^{13}\text{C}$  NMR of *tert*-butyl (S)-(2-(2-(2-amino-5-(naphthalen-2-yl)benzamido)-3-(1H-indol-3-yl)propanamido)ethyl)carbamate (15b)

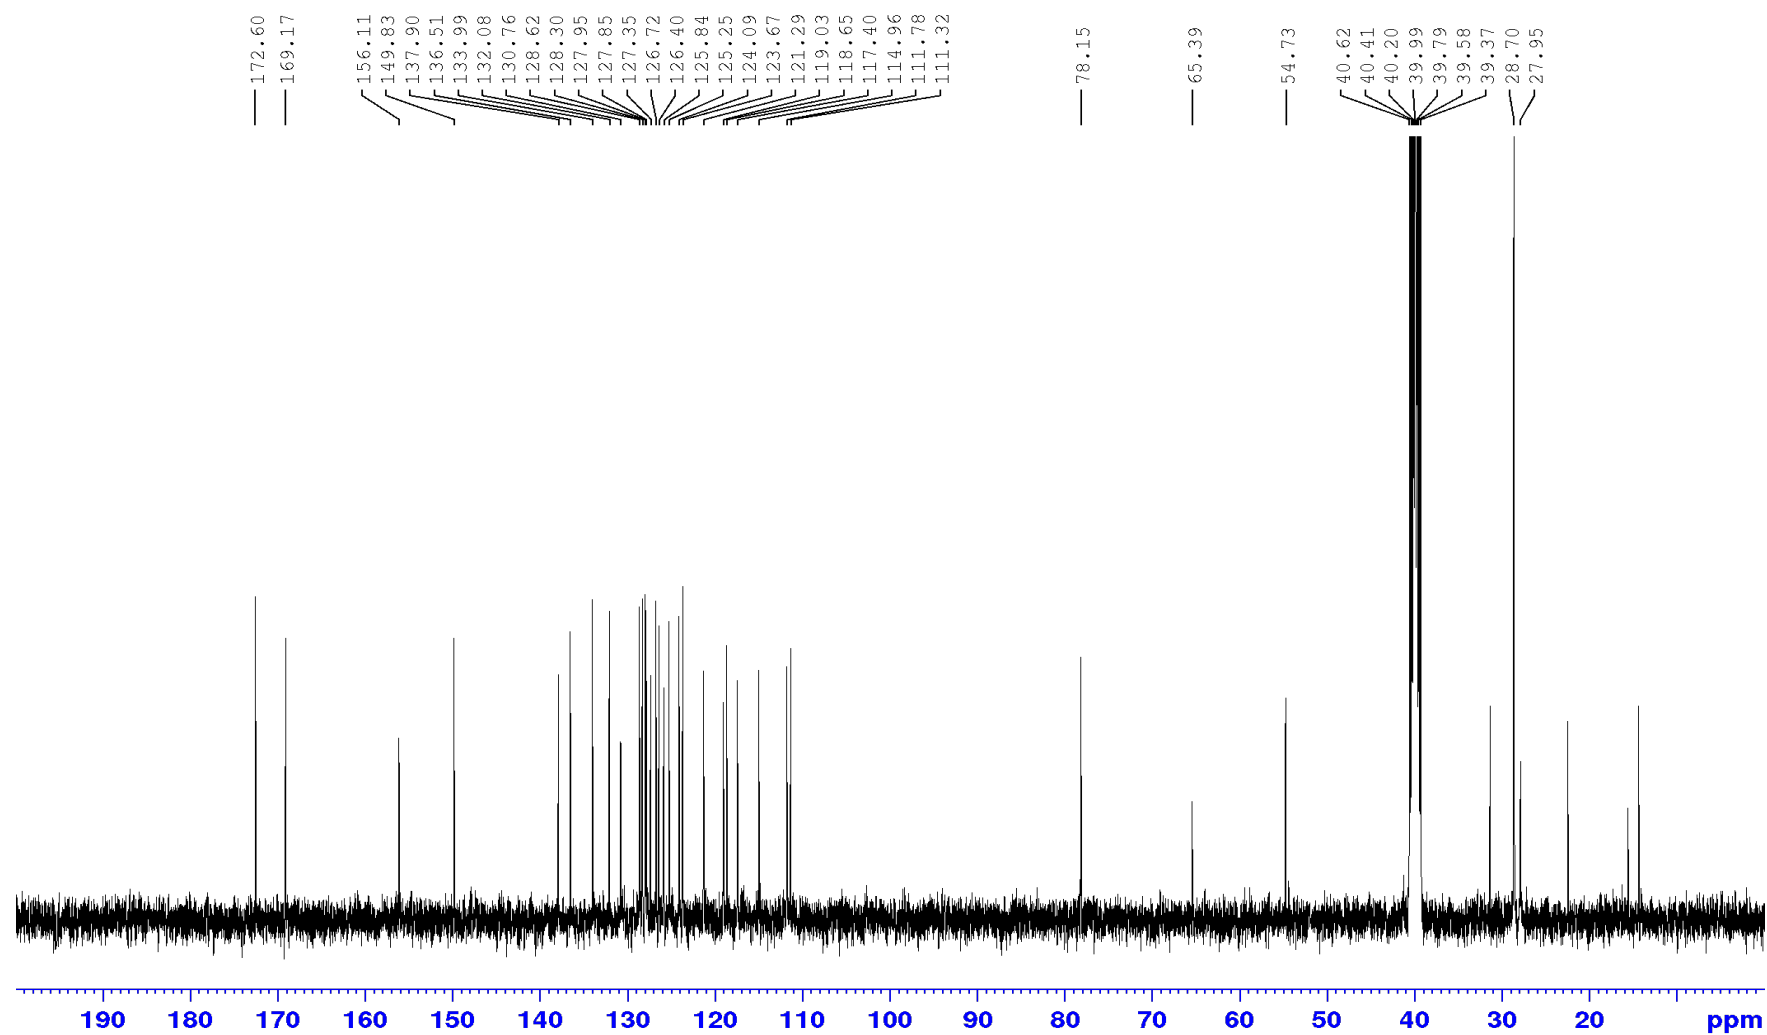

$^1\text{H}$  NMR of *tert*-butyl (S)-(2-(2-(4-amino-4'-fluoro-[1,1'-biphenyl]-3-carboxamido)-3-(1H-indol-3-yl)propanamido)ethyl)carbamate (15c)

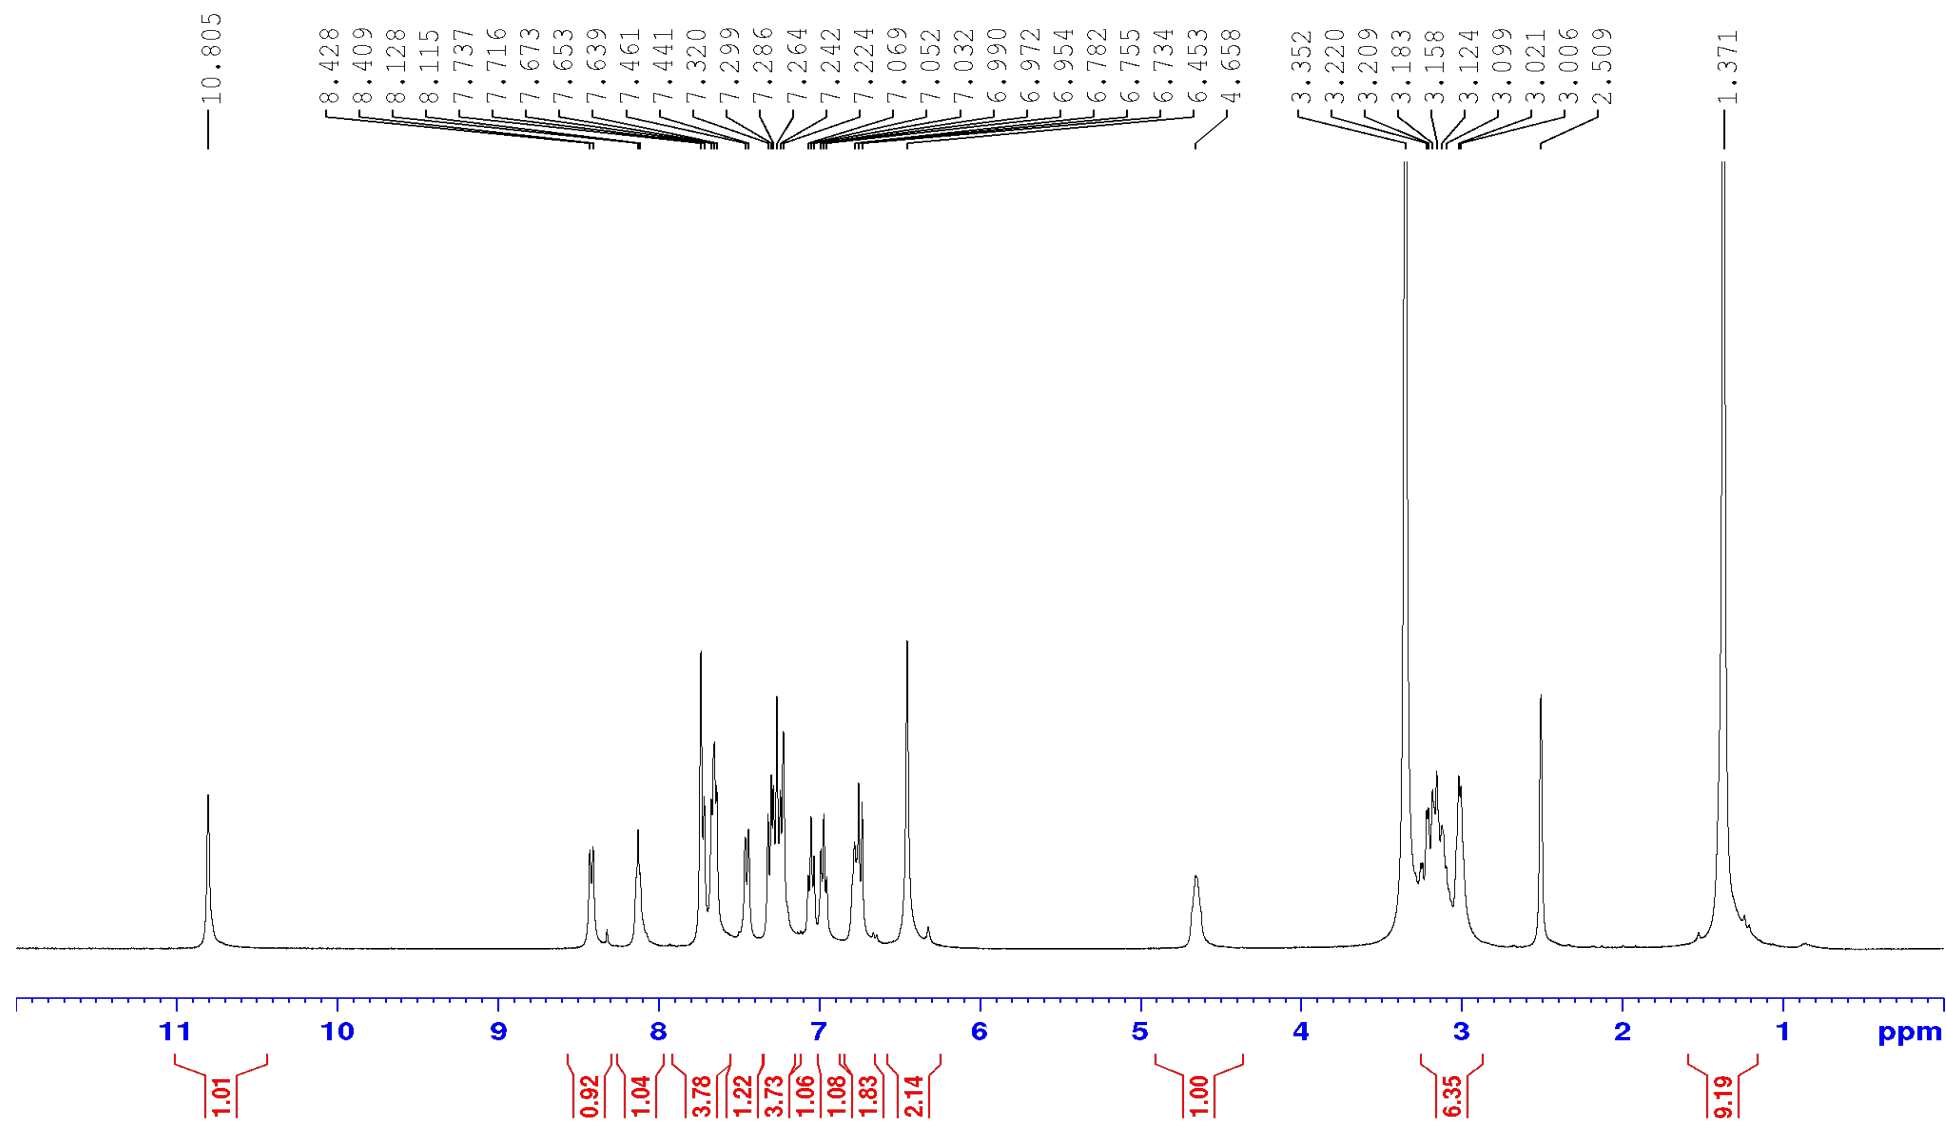

$^{13}\text{C}$  NMR of *tert*-butyl (S)-(2-(2-(4-amino-4'-fluoro-[1,1'-biphenyl]-3-carboxamido)-3-(1H-indol-3-yl)propanamido)ethyl)carbamate (15c)

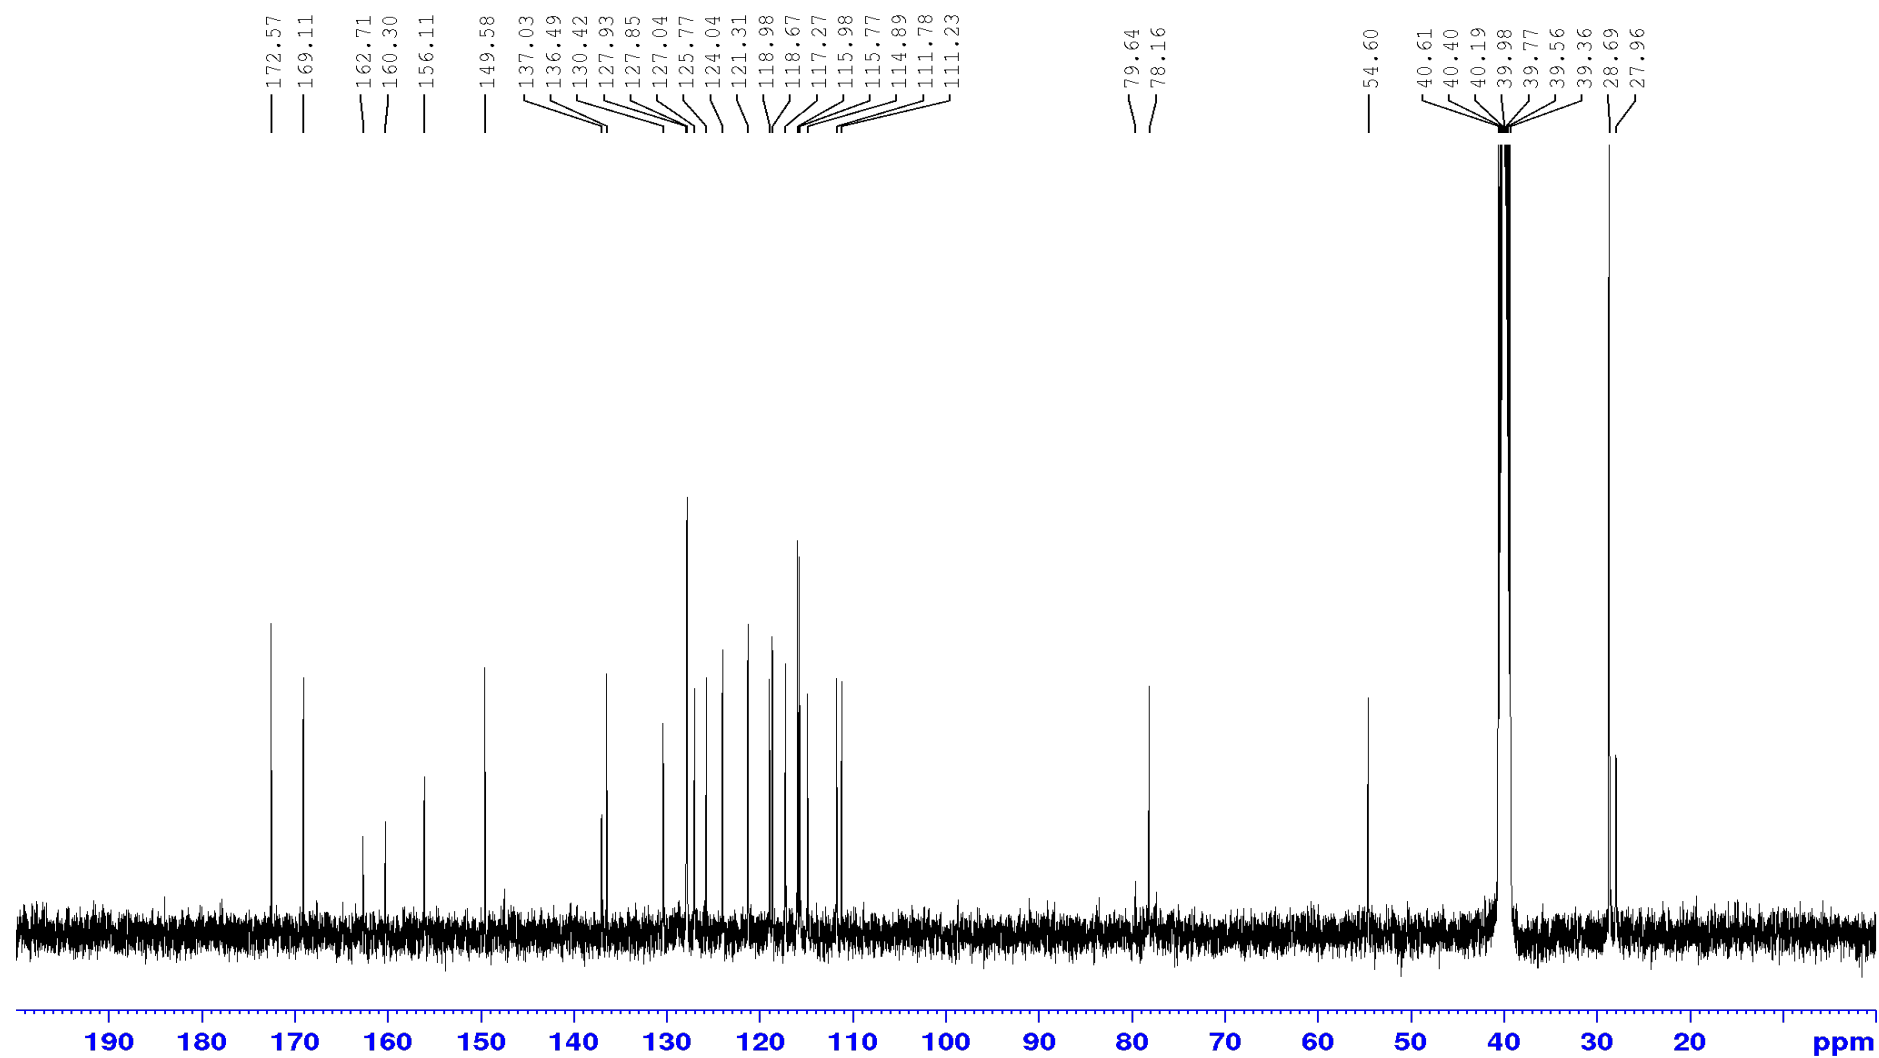

$^1\text{H}$  NMR of *tert*-butyl (S)-(2-(2-(4-amino-4'-(trifluoromethyl)-[1,1'-biphenyl]-3-carboxamido)-3-(1H-indol-3-yl)propanamido)ethyl)carbamate (15d)

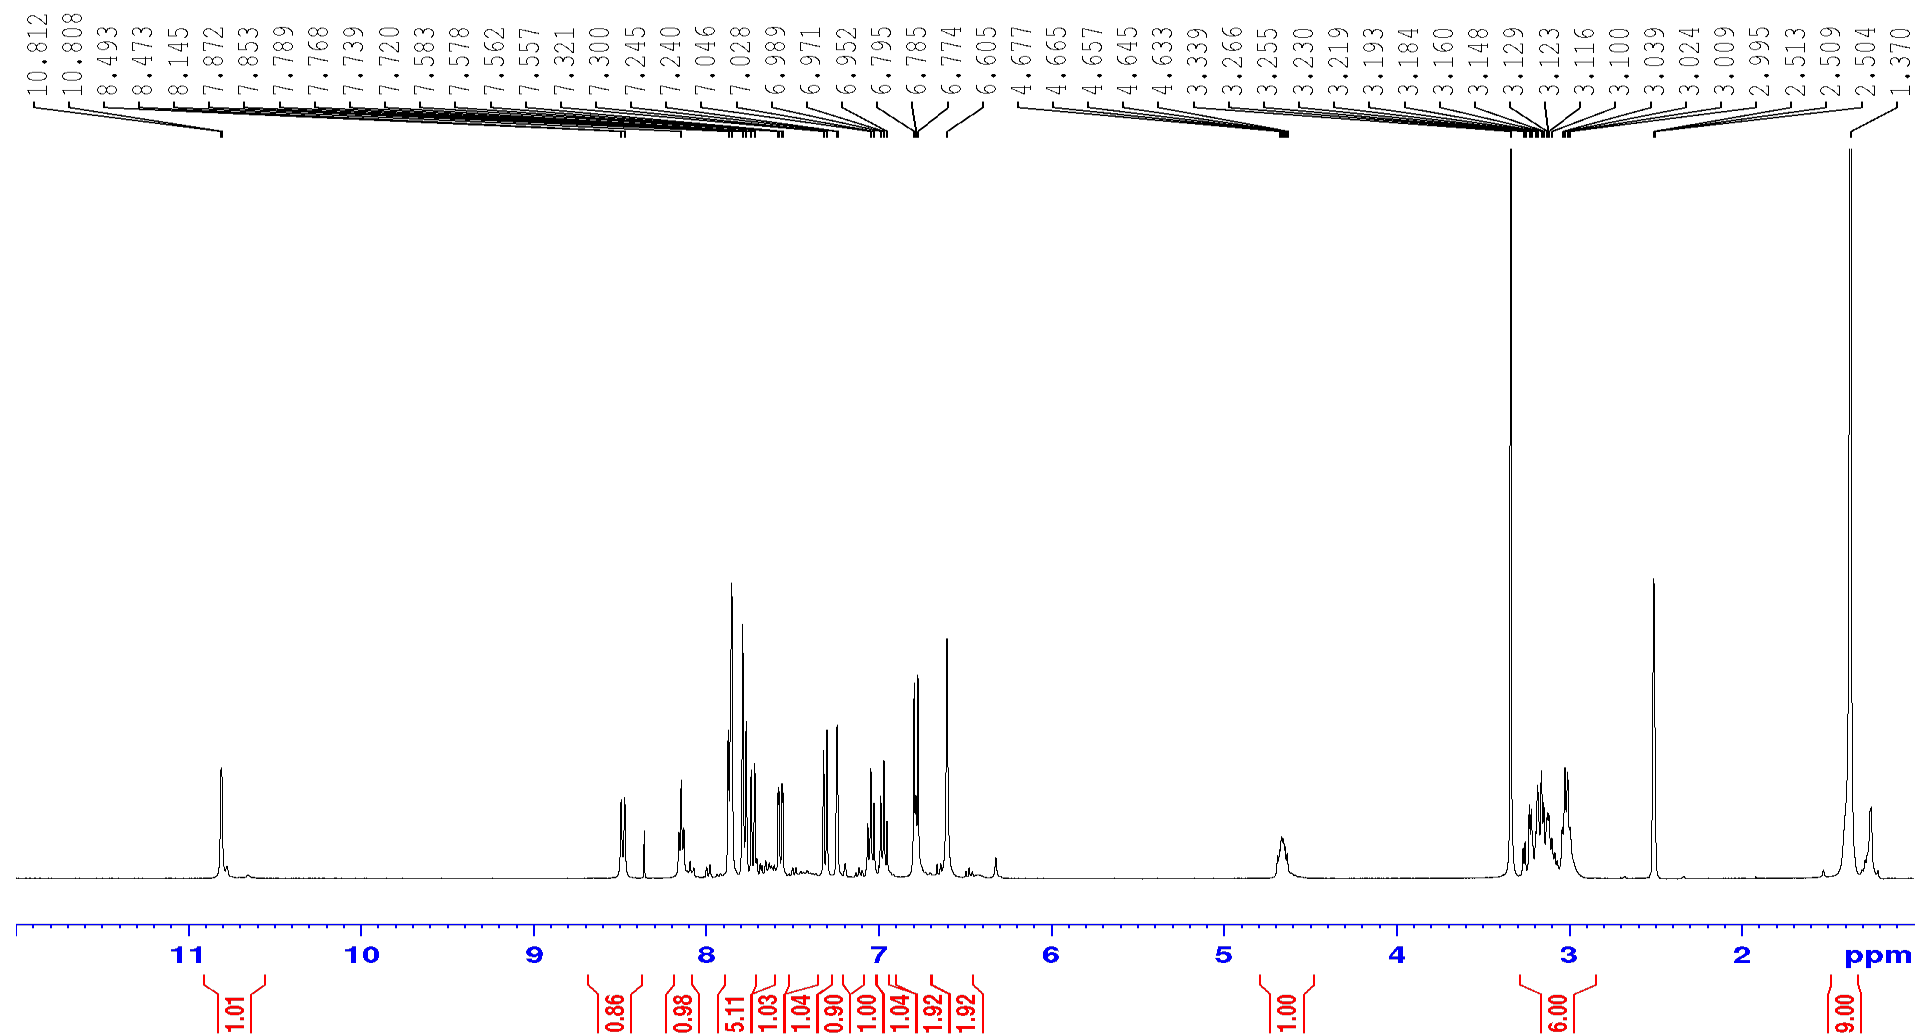

$^{13}\text{C}$  NMR of *tert*-butyl (S)-(2-(2-(4-amino-4'-(trifluoromethyl)-[1,1'-biphenyl]-3-carboxamido)-3-(1H-indol-3-yl)propanamido)ethyl)carbamate (15d)

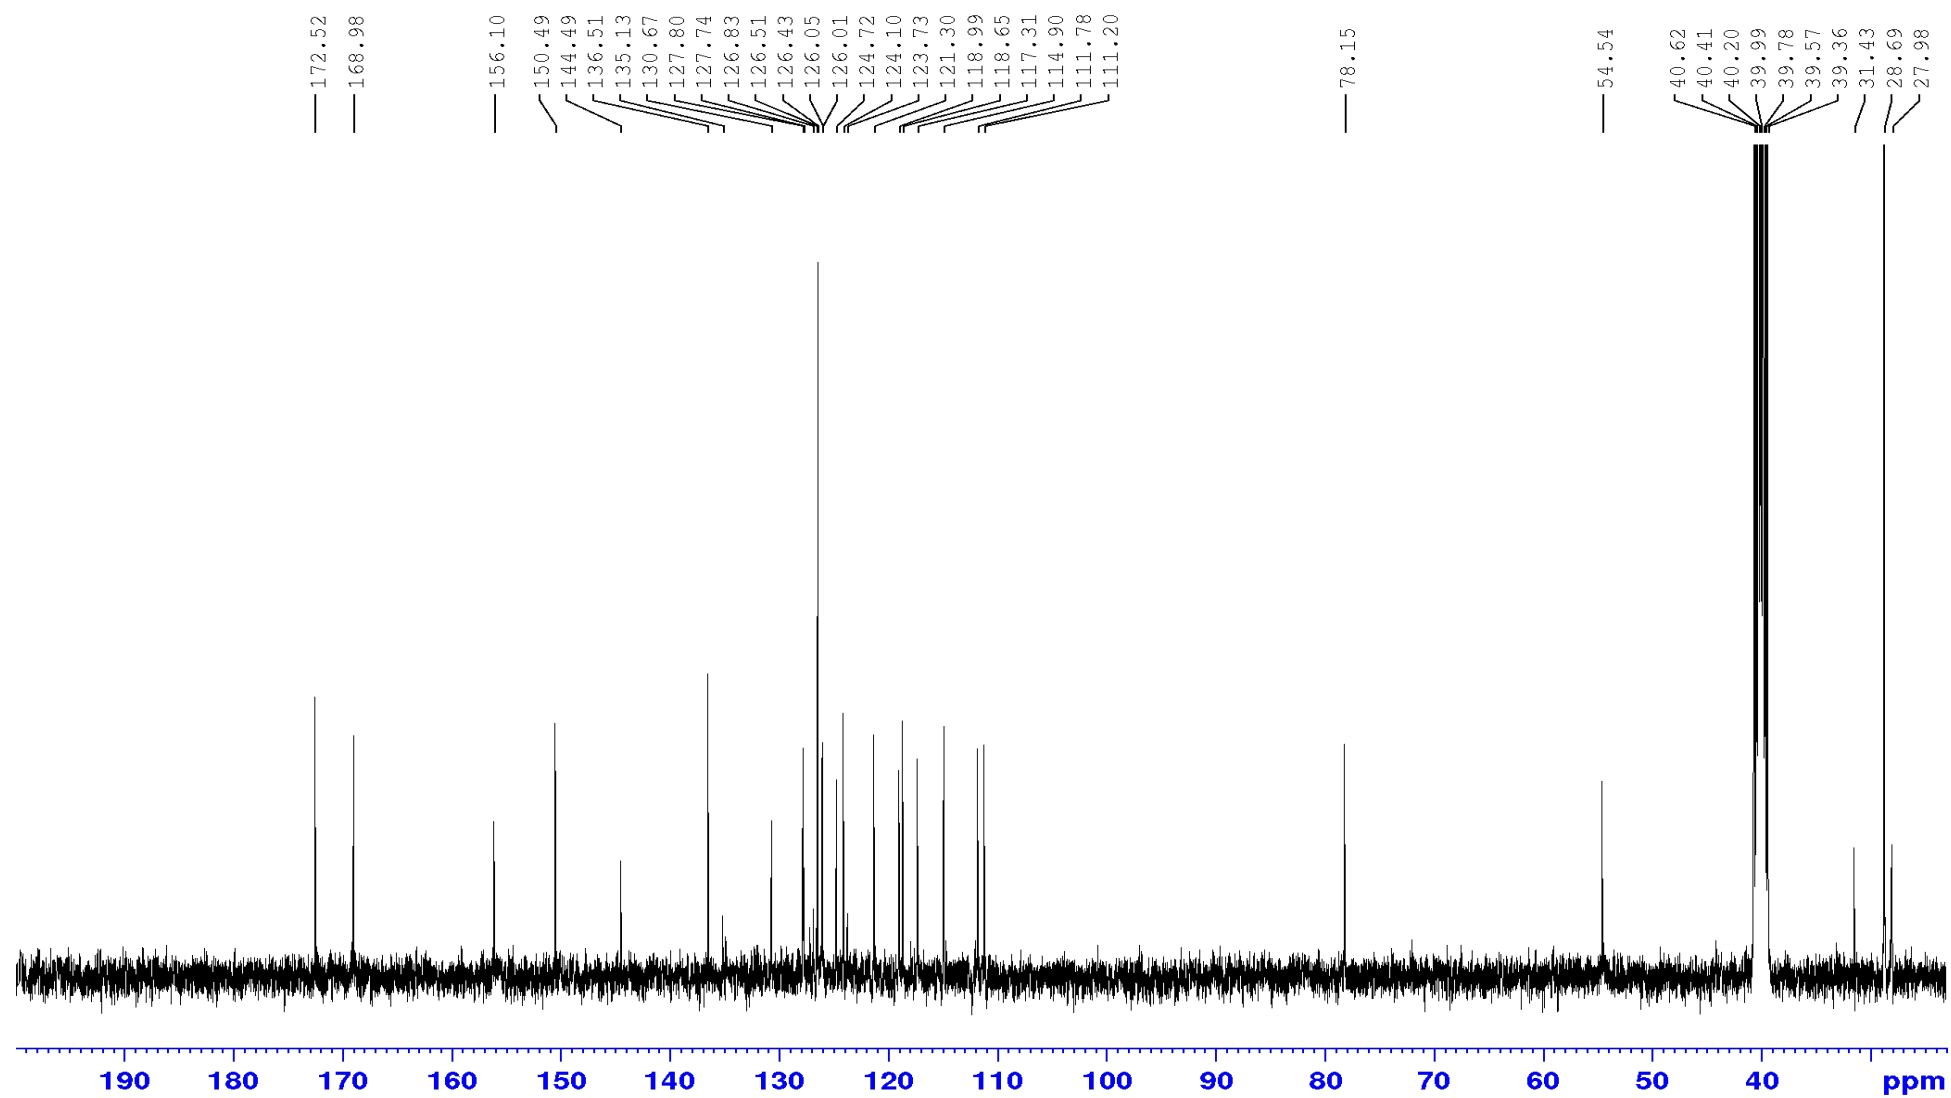

<sup>1</sup>H NMR of (S)-4-amino-N-(1-((2-aminoethyl)amino)-3-(1H-indol-3-yl)-1-oxopropan-2-yl)-4'-(tert-butyl)-[1,1'-biphenyl]-3-carboxamide (16a)

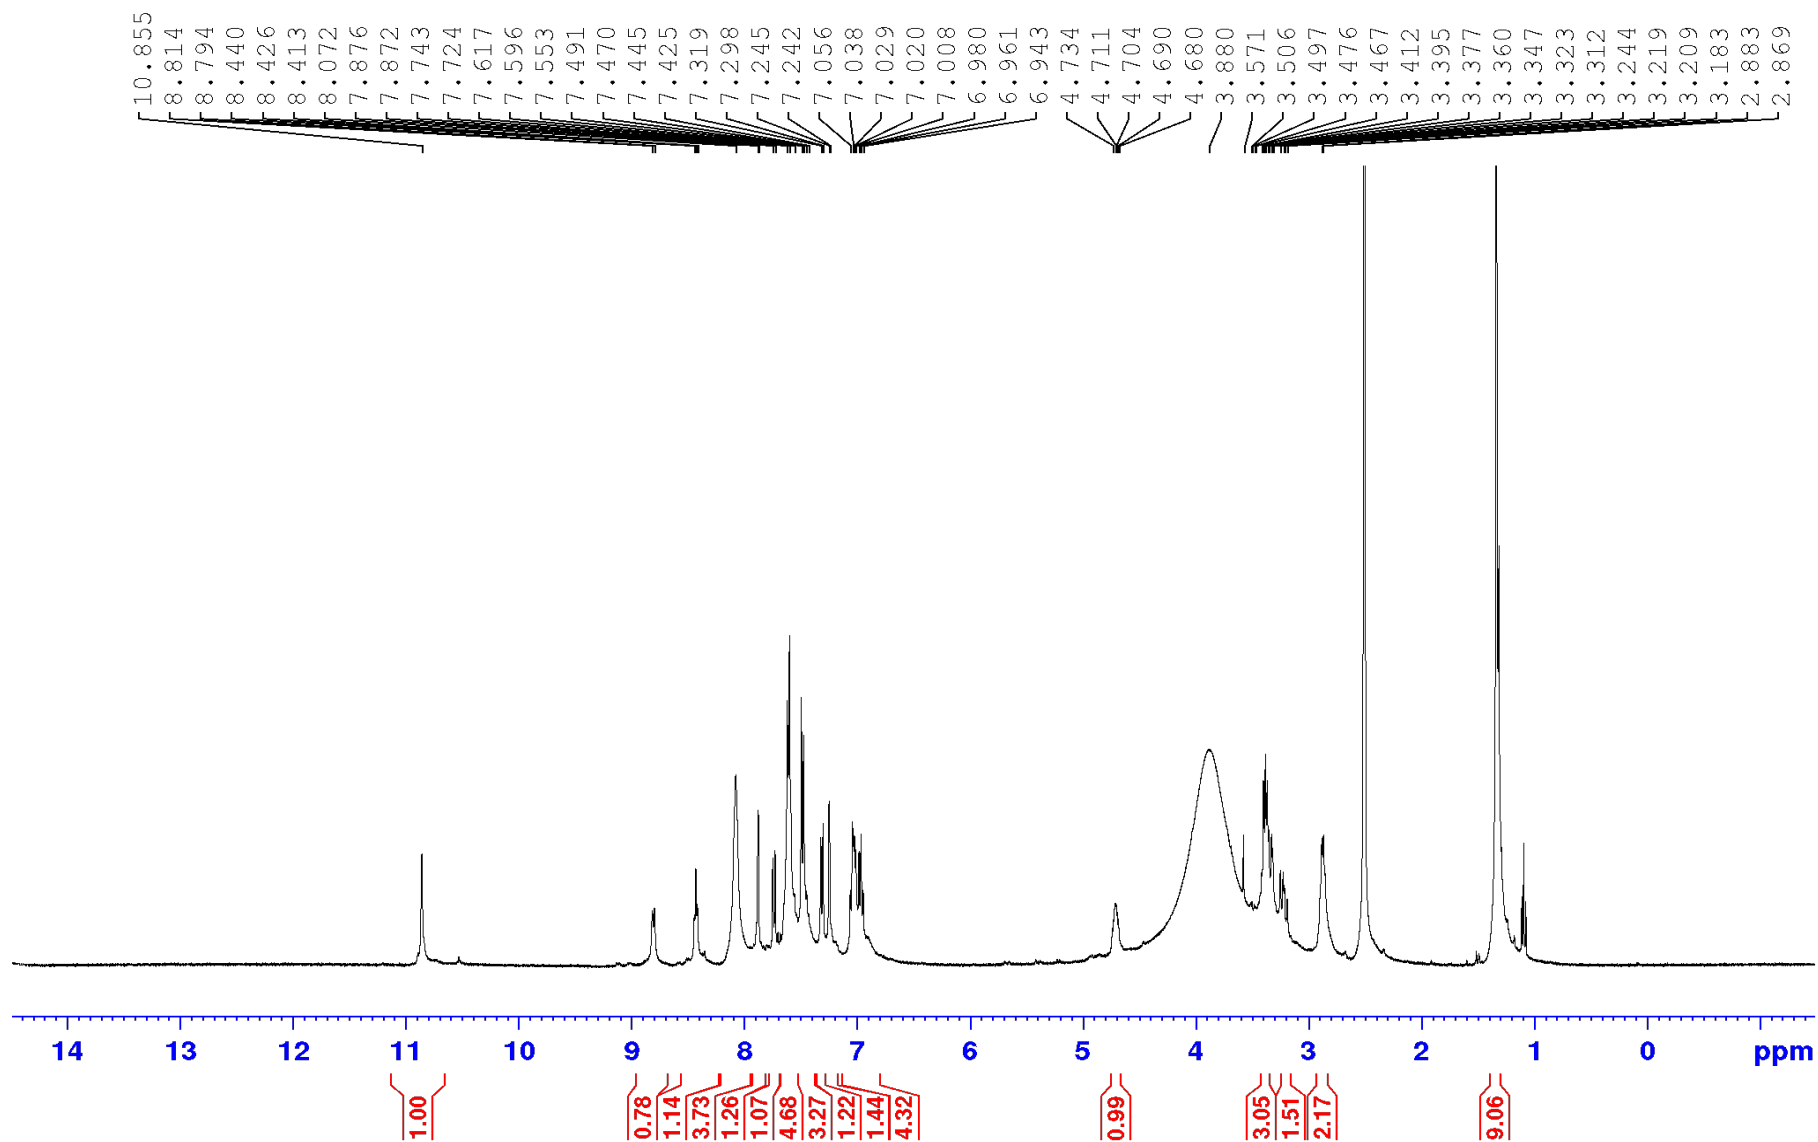

$^{13}\text{C}$  NMR of (S)-4-amino-N-(1-((2-aminoethyl)amino)-3-(1H-indol-3-yl)-1-oxopropan-2-yl)-4'-(tert-butyl)-[1,1'-biphenyl]-3-carboxamide (16a)

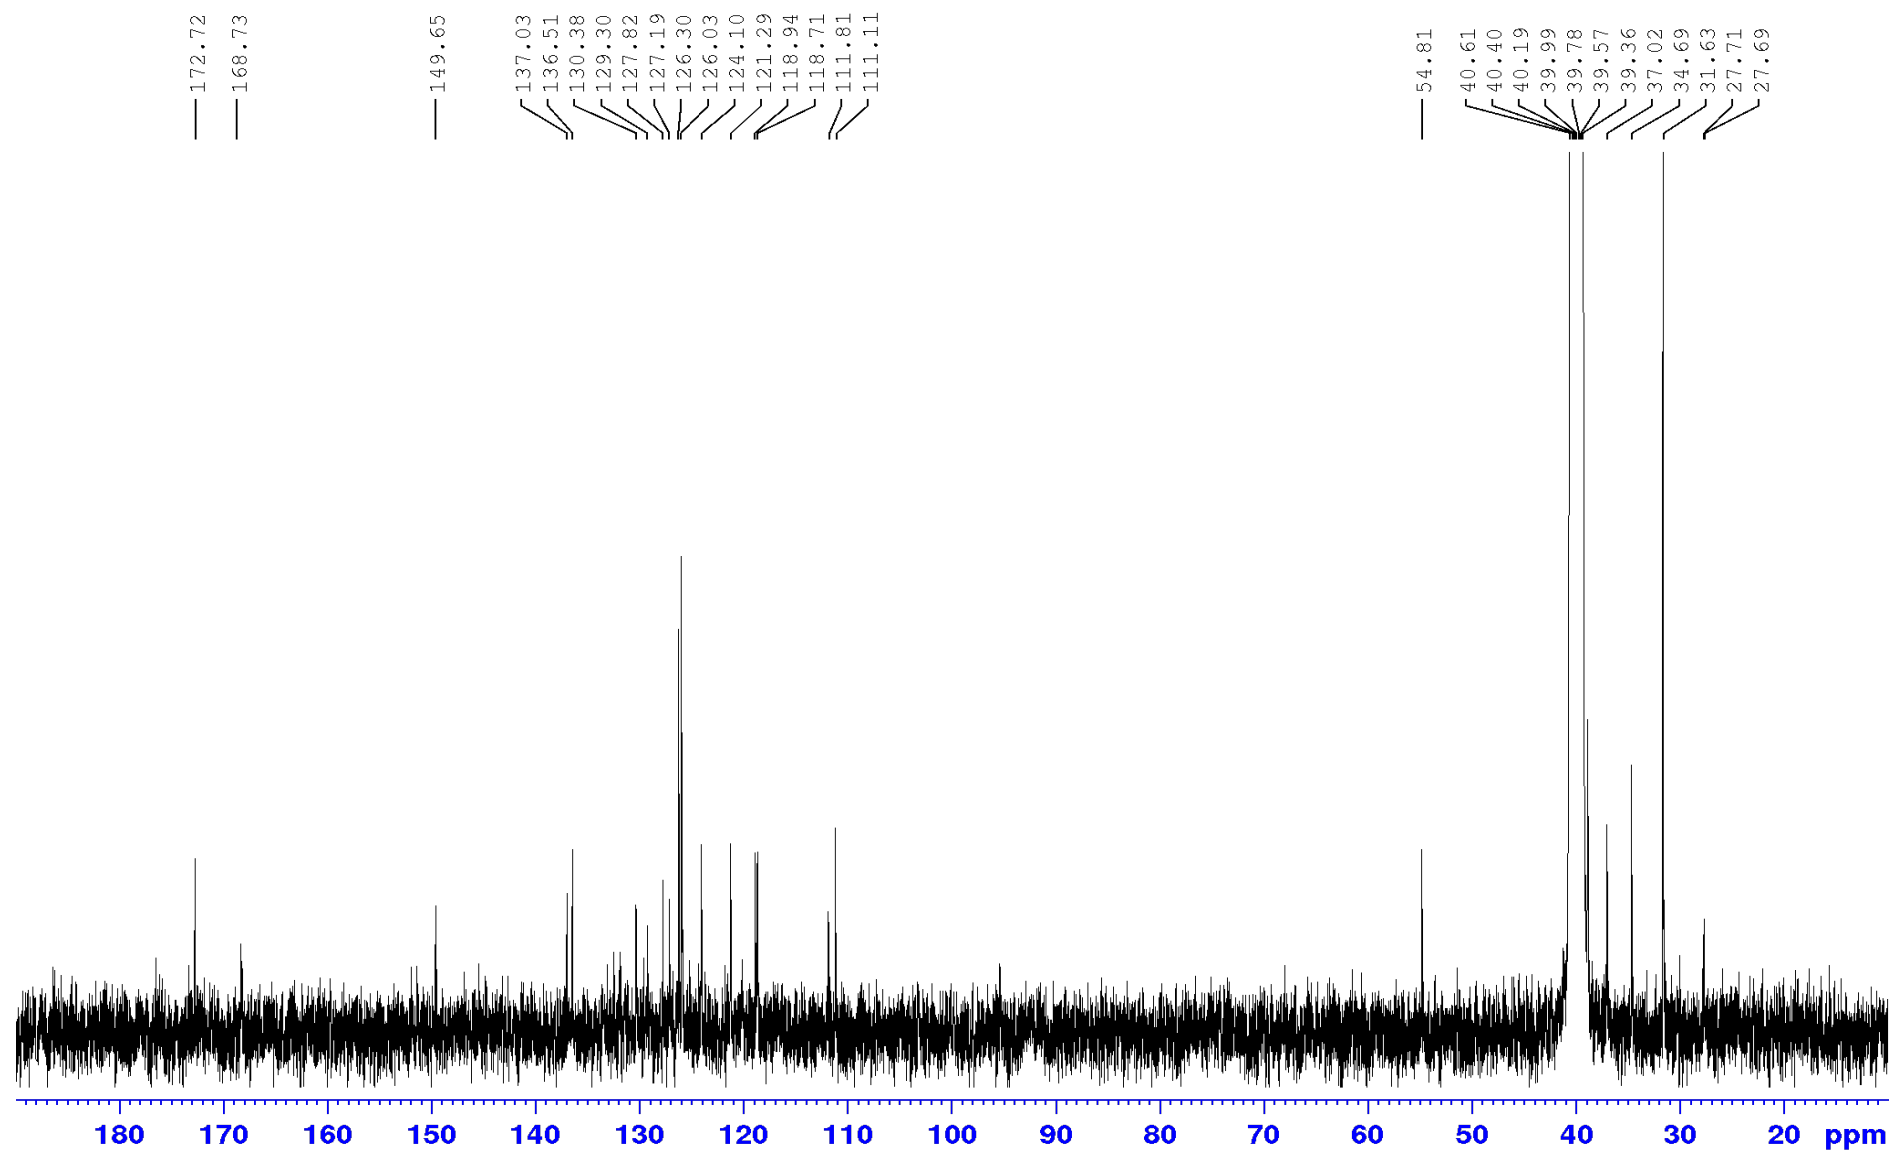

<sup>1</sup>H NMR of (S)-2-amino-N-(1-((2-aminoethyl)amino)-3-(1*H*-indol-3-yl)-1-oxopropan-2-yl)-5-(naphthalen-2-yl)benzamide (16b)

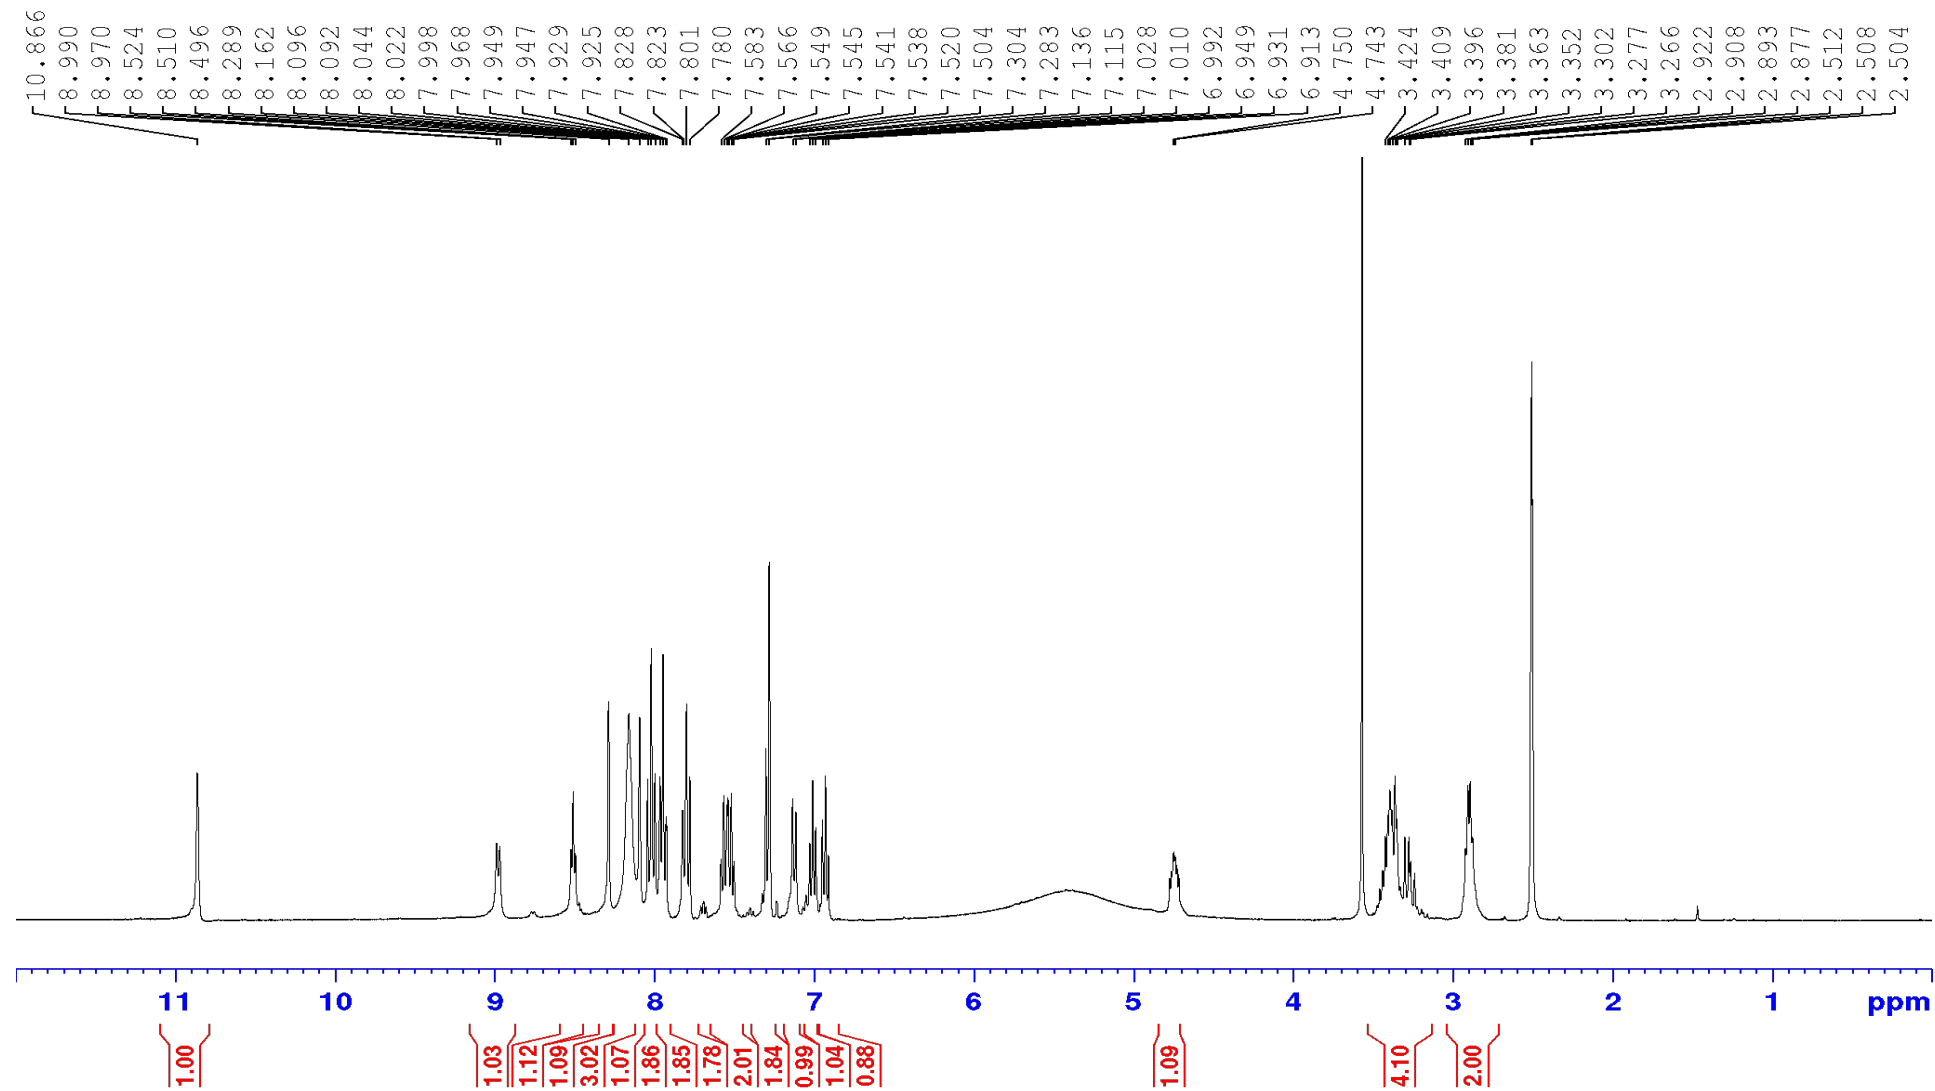



$^{13}\text{C}$  NMR of (S)-2-amino-N-(1-((2-aminoethyl)amino)-3-(1*H*-indol-3-yl)-1-oxopropan-2-yl)-5-(naphthalen-2-yl)benzamide (16b)

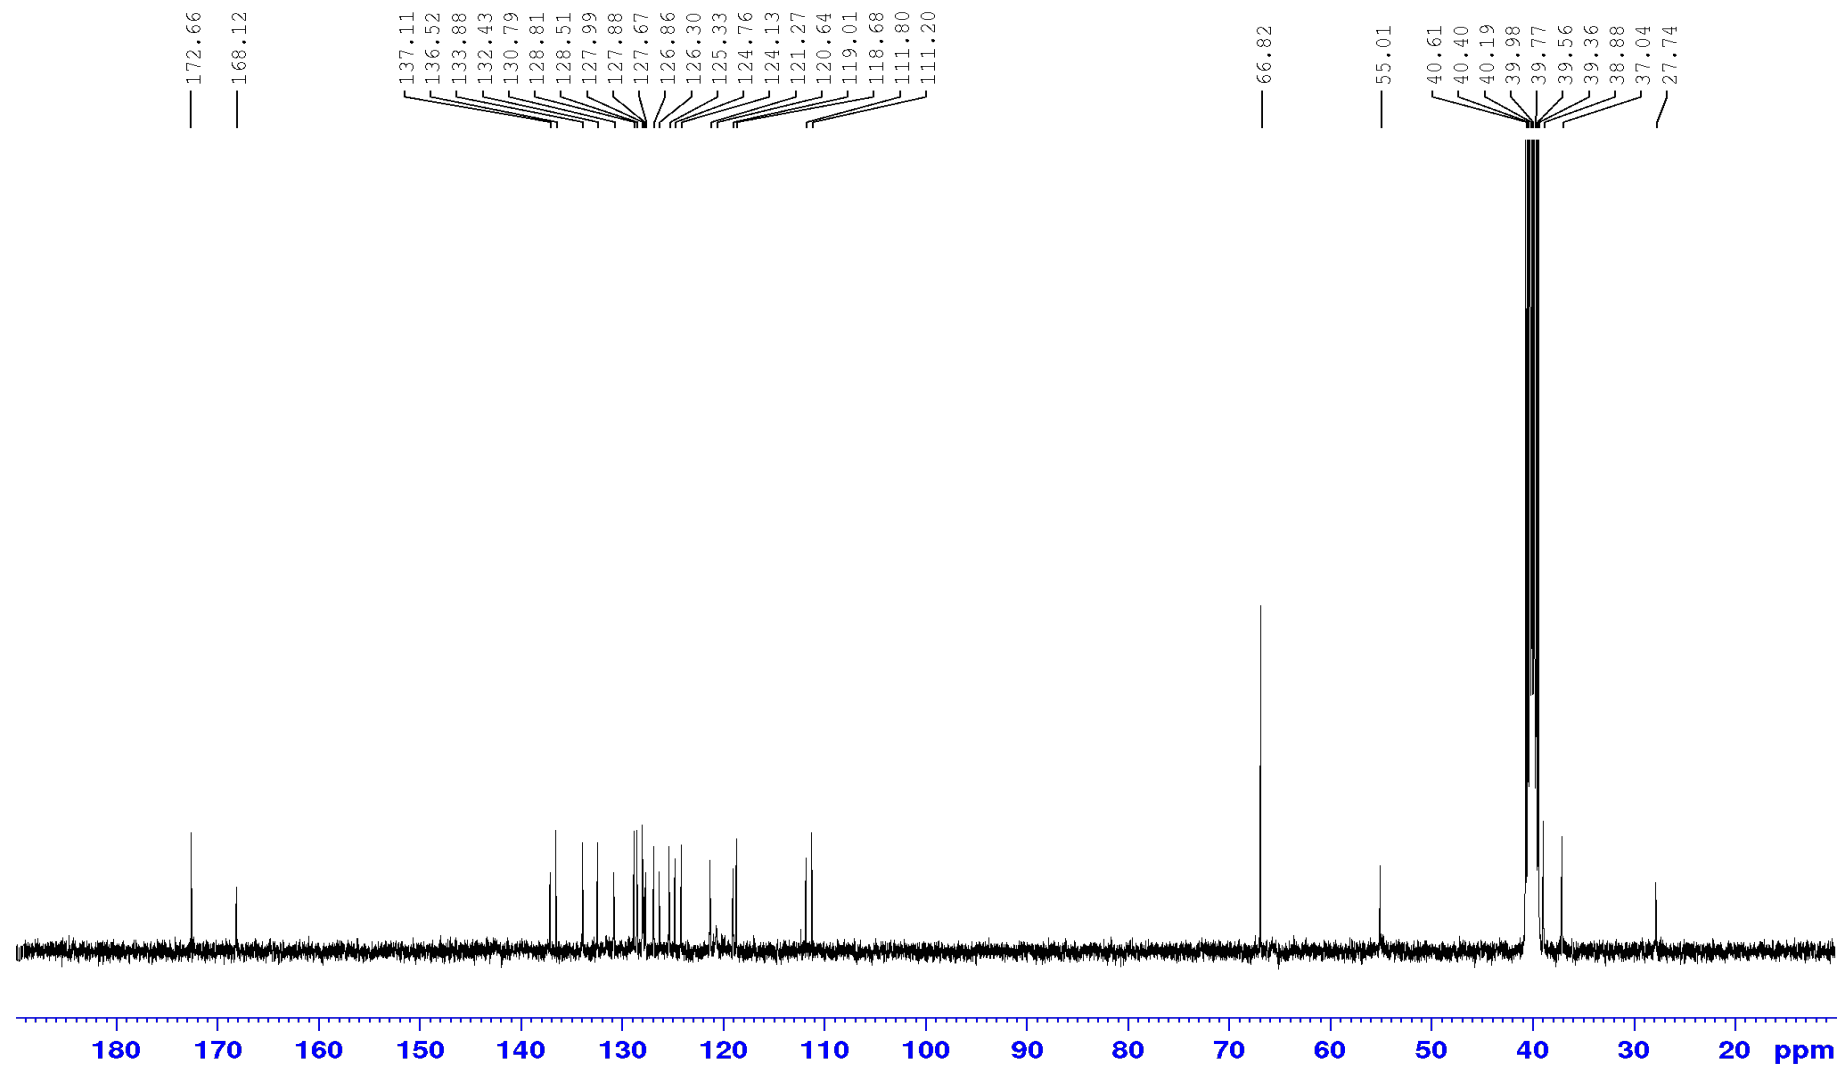

<sup>1</sup>H NMR of (S)-4-amino-N-(1-((2-aminoethyl)amino)-3-(1H-indol-3-yl)-1-oxopropan-2-yl)-4'-fluoro-[1,1'-biphenyl]-3-carboxamide (16c)

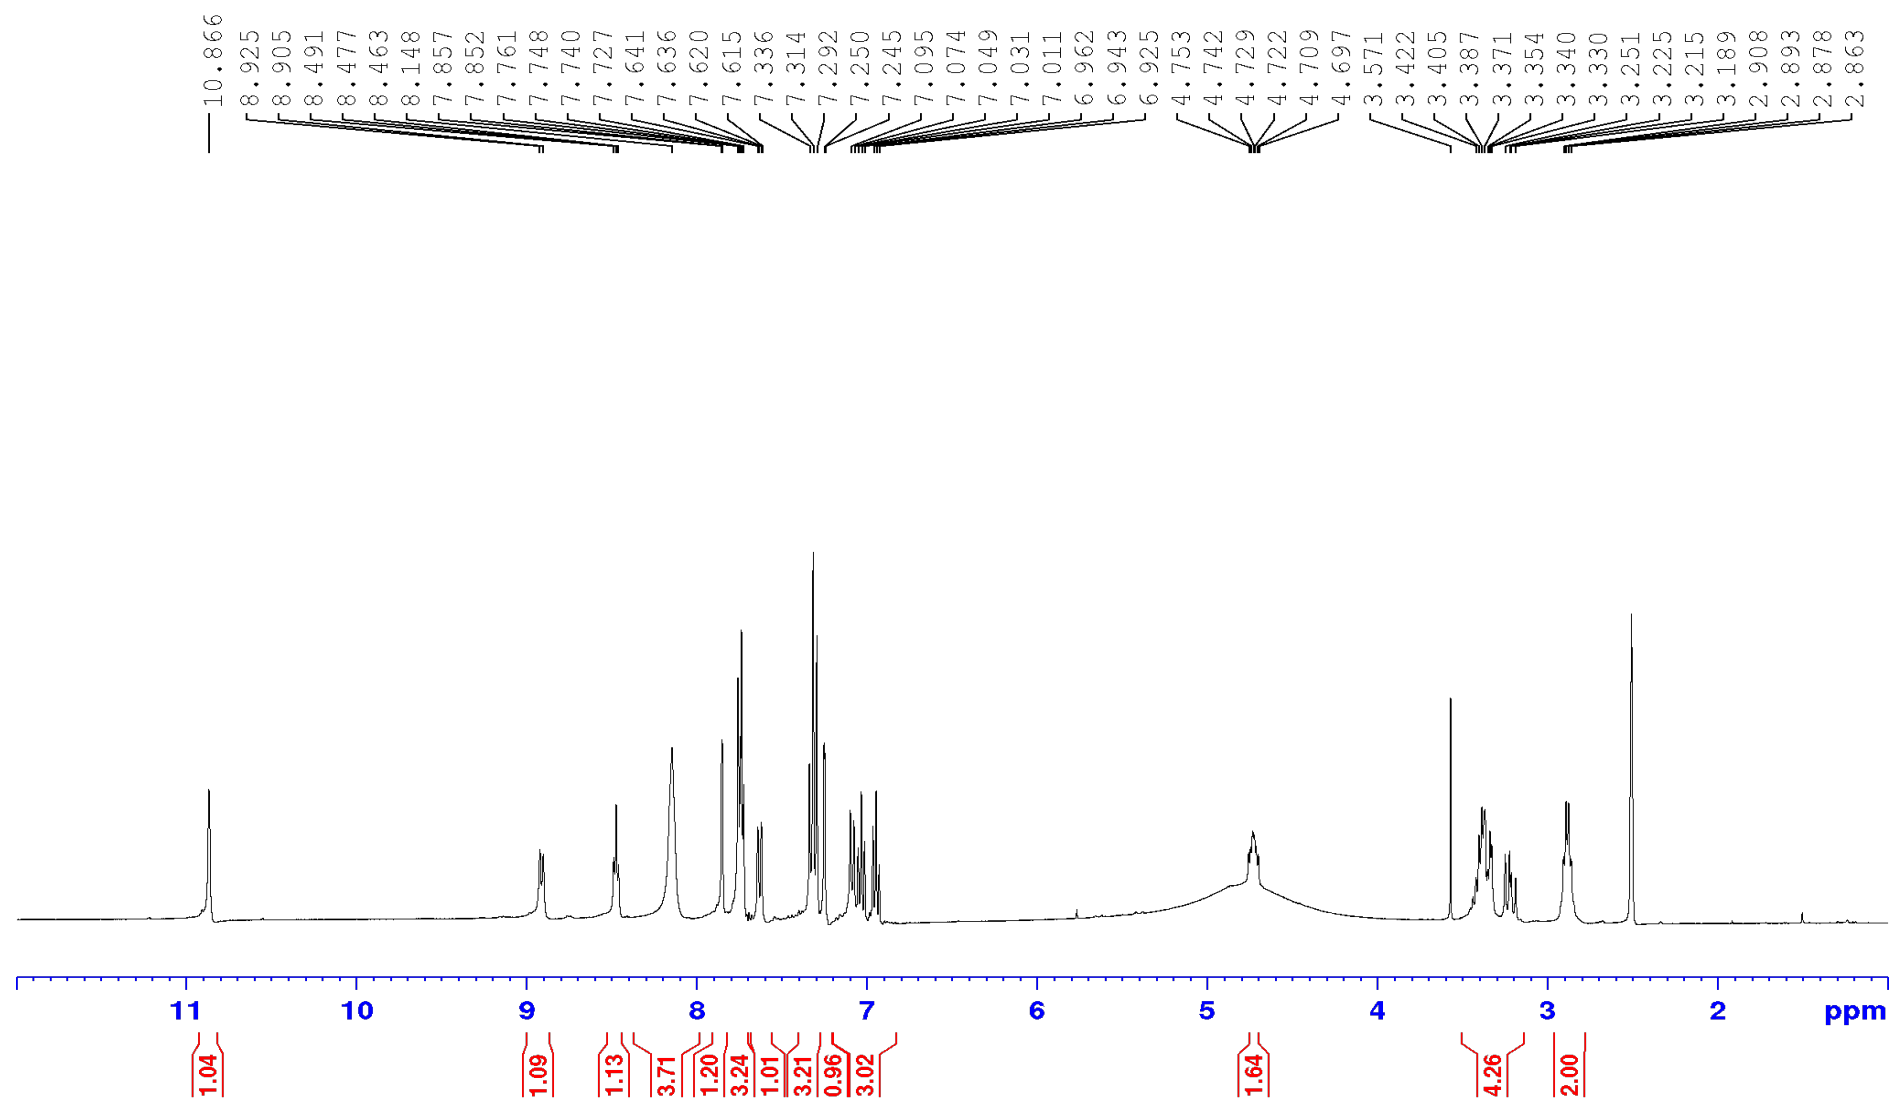

<sup>1</sup>H NMR of (S)-4-amino-N-(1-((2-aminoethyl)amino)-3-(1H-indol-3-yl)-1-oxopropan-2-yl)-4'-(trifluoromethyl)-[1,1'-biphenyl]-3-carboxamide (16d)

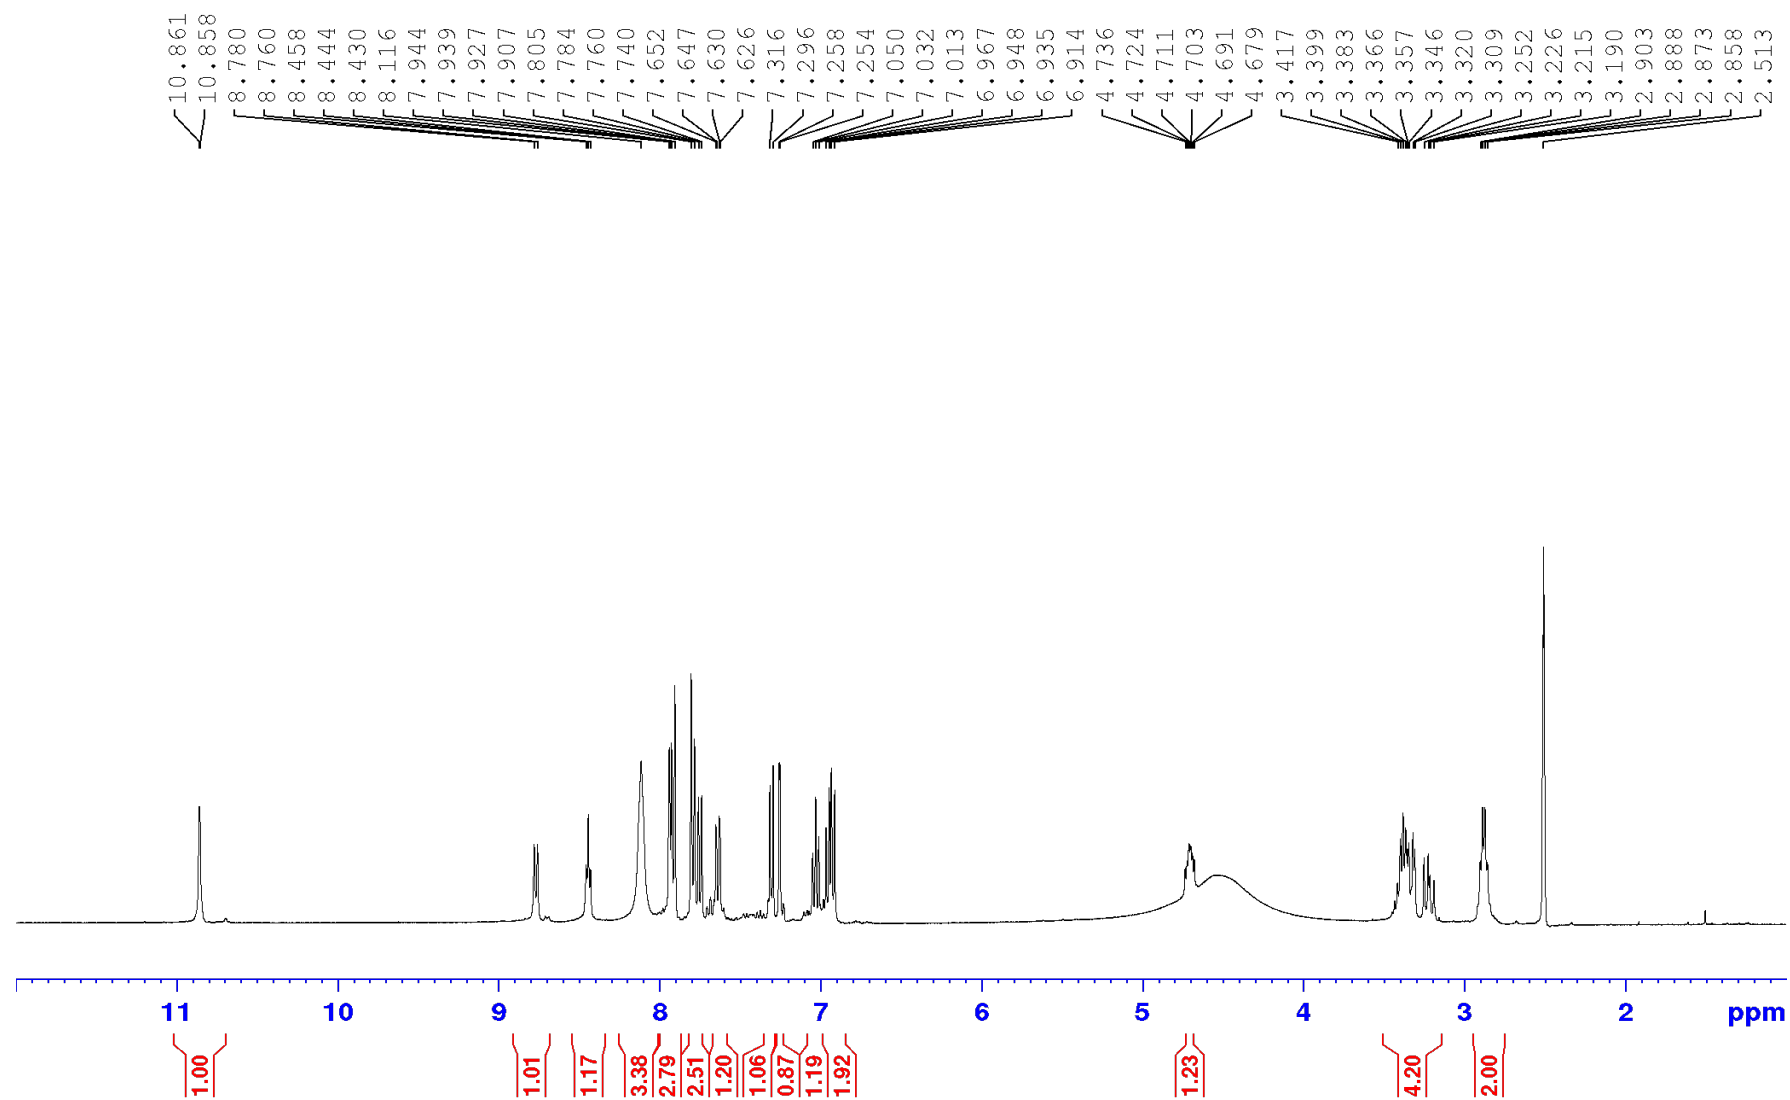

$^{13}\text{C}$  NMR of (S)-4-amino-N-(1-((2-aminoethyl)amino)-3-(1H-indol-3-yl)-1-oxopropan-2-yl)-4'-(trifluoromethyl)-[1,1'-biphenyl]-3-carboxamide (16d)

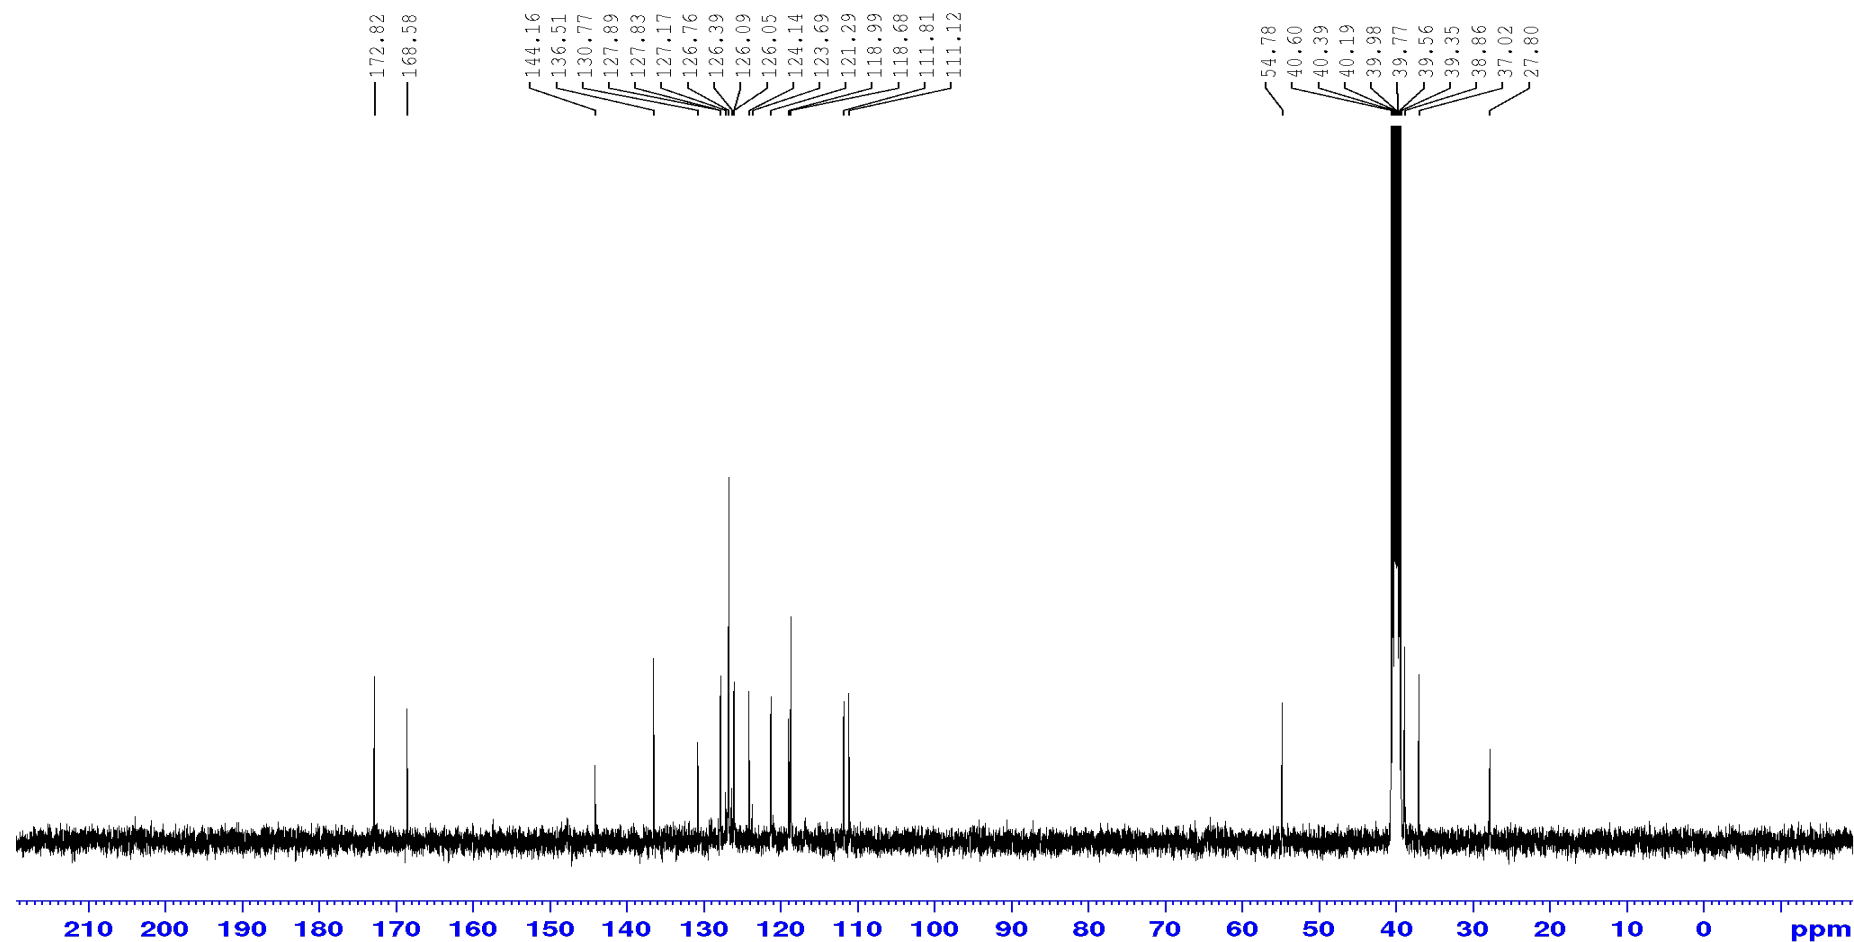

<sup>1</sup>H NMR of di-*tert*-butyl ((S)-6-((2-((S)-2-(2-(2-naphthamido)-5-bromobenzamido)-3-(1H-indol-3-yl)propanamido)ethyl)amino)-6-oxohexane-1,5-diyl)dicarbamate (18a)

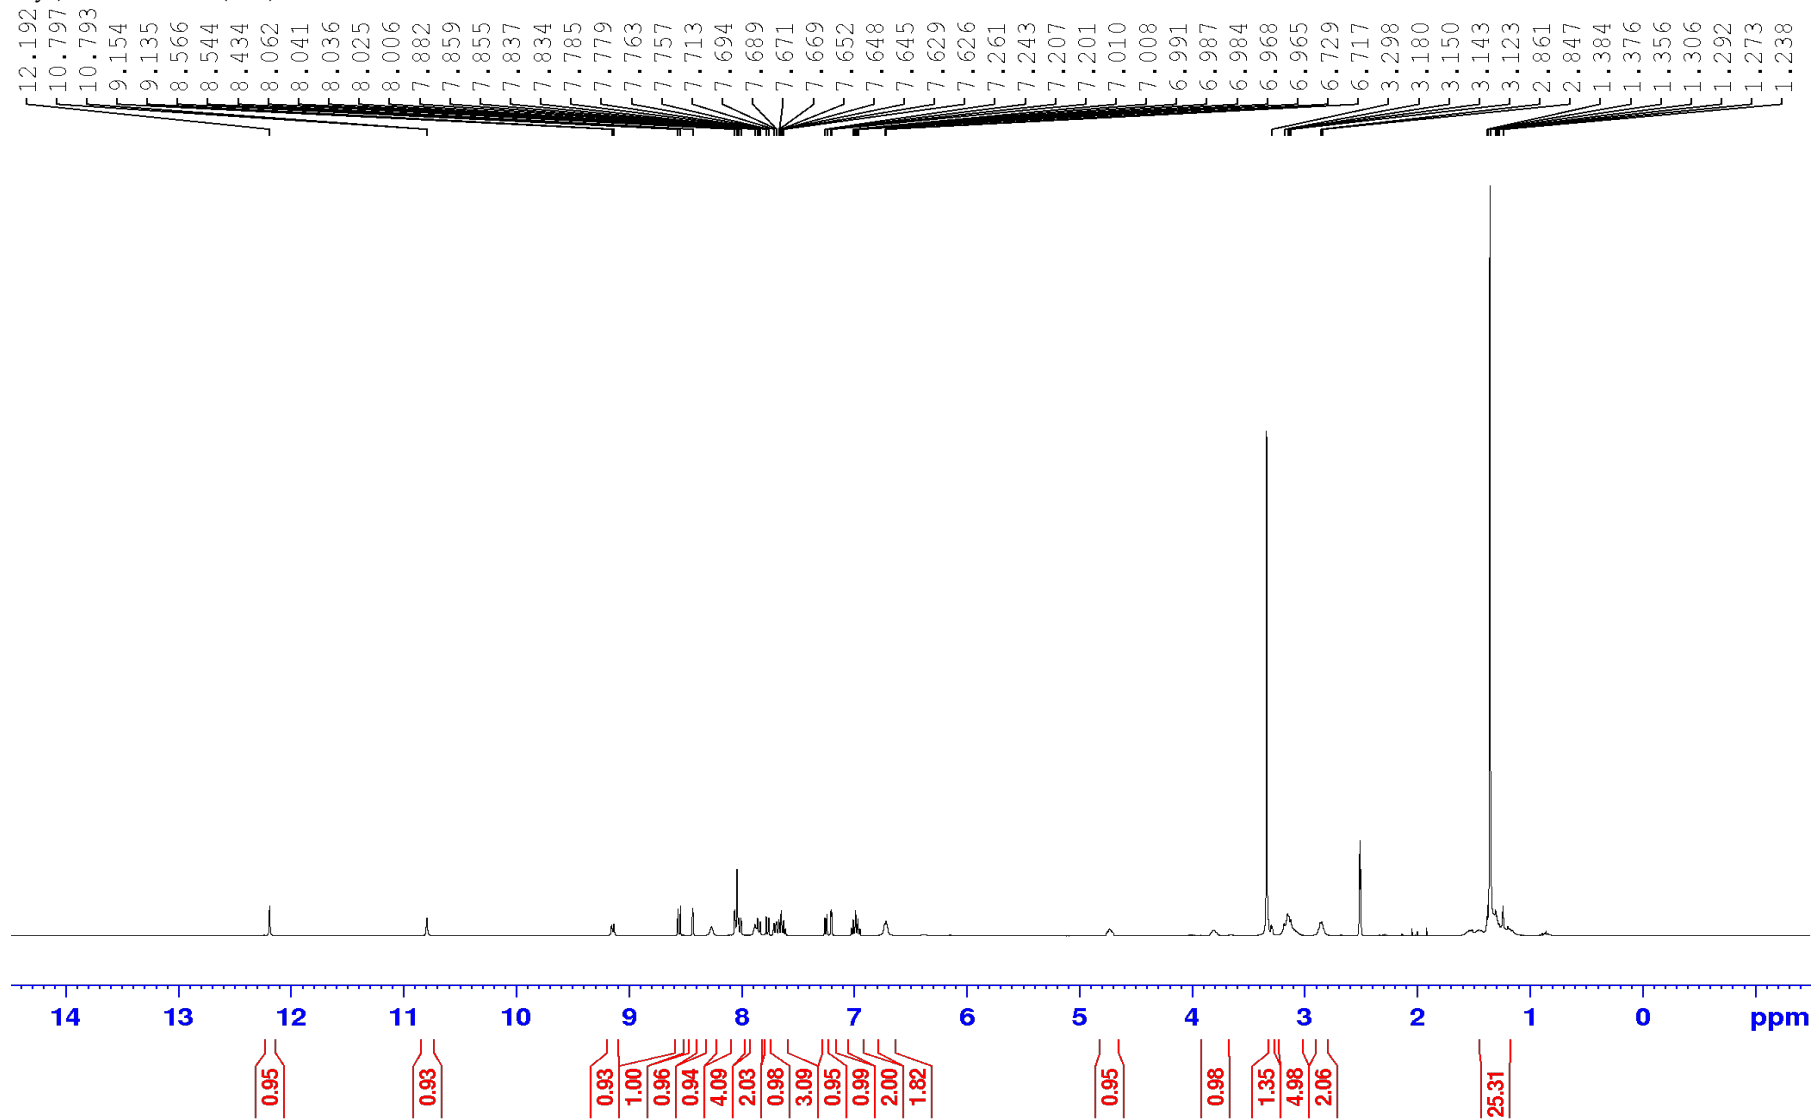

$^{13}\text{C}$  NMR of di-*tert*-butyl ((*S*)-6-((2-((*S*)-2-(2-(2-naphthamido)-5-bromobenzamido)-3-(1*H*-indol-3-yl)propanamido)ethyl)amino)-6-oxohexane-1,5-diyl)dicarbamate (18a)

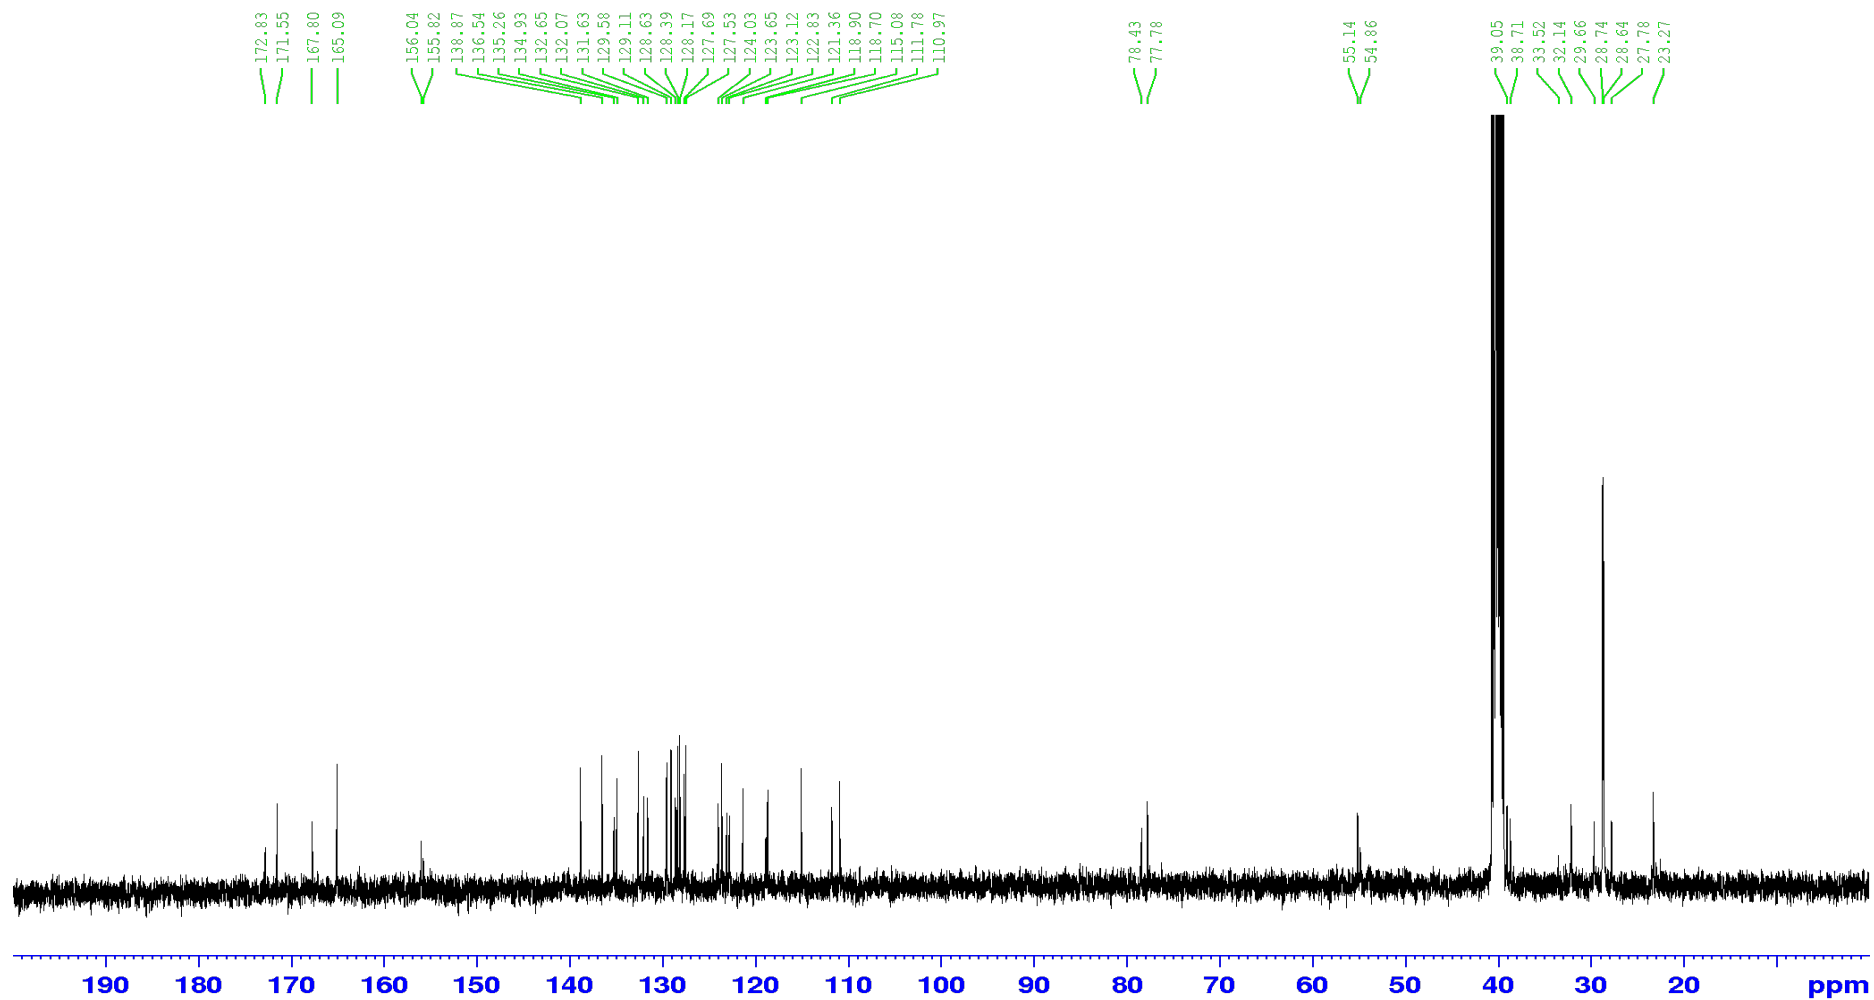

$^1\text{H}$  NMR of *di-tert*-butyl ((*S*)-6-((2-((*S*)-2-(2-([1,1'-biphenyl]-3-carboxamido)-5-bromobenzamido)-3-(1*H*-indol-3-yl)propanamido)ethyl)amino)-6-oxohexane-1,5-diyl)dicarbamate (**18b**)

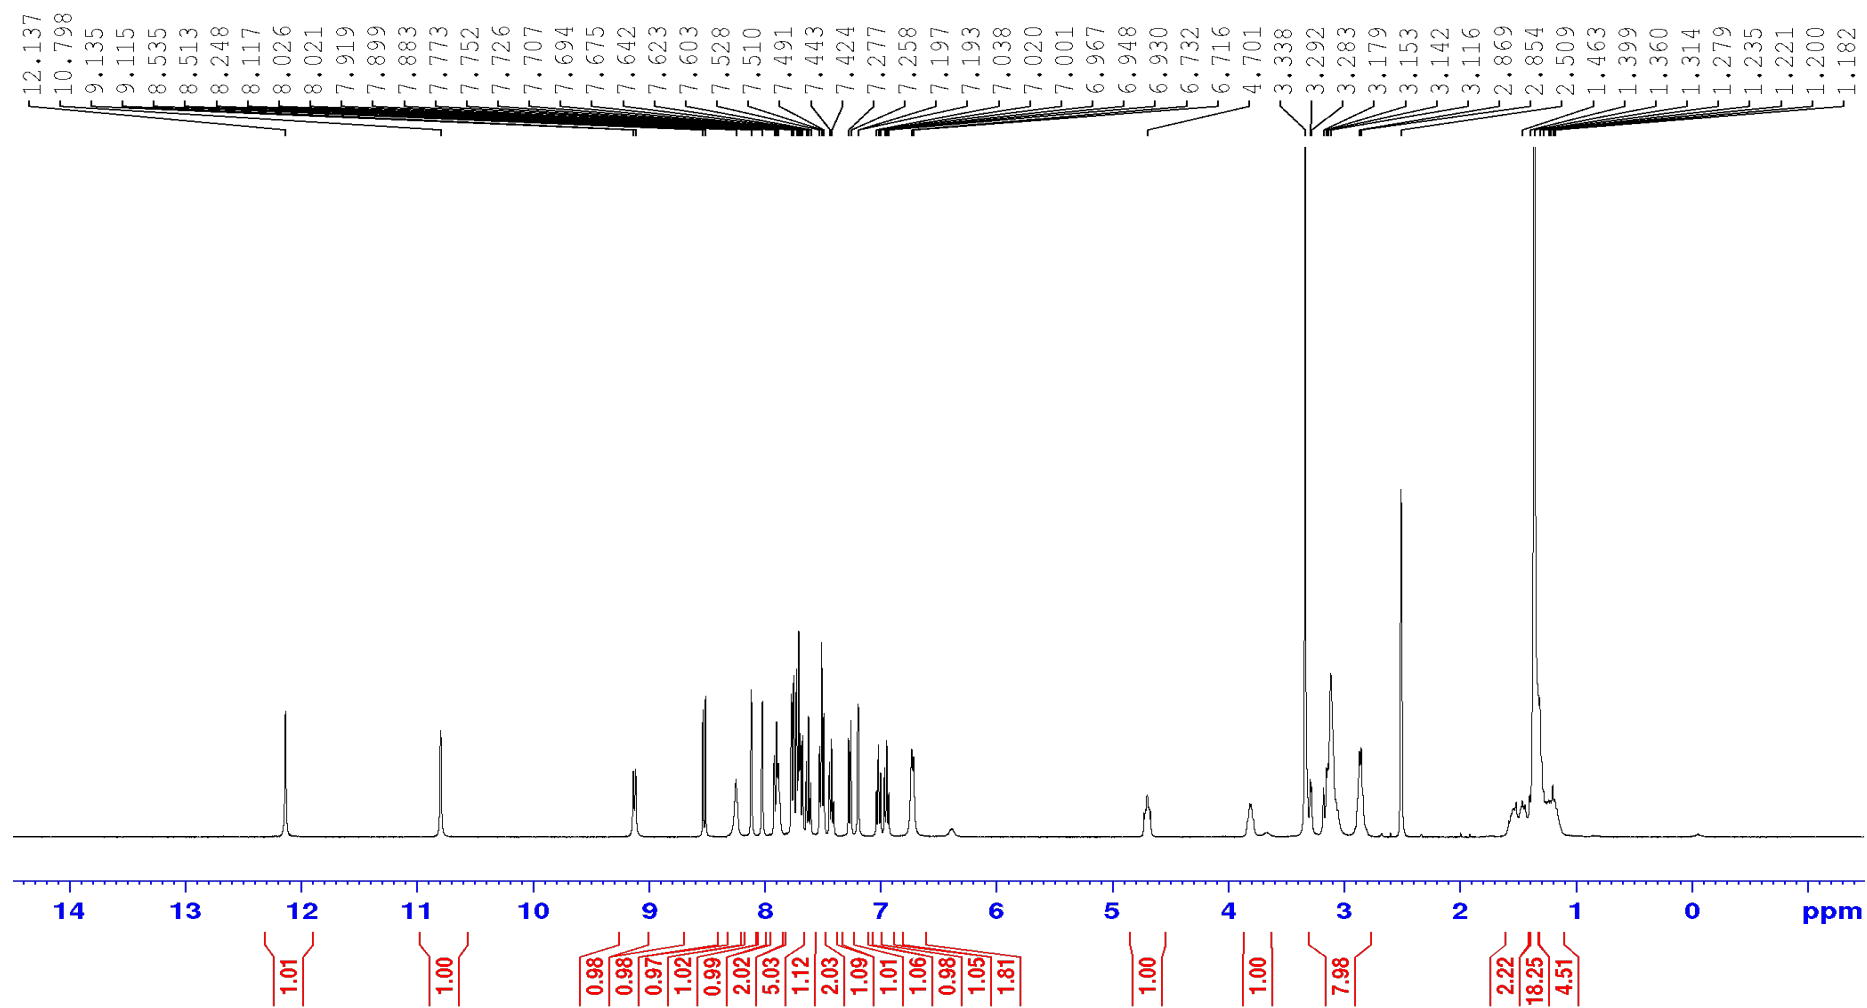

$^{13}\text{C}$  NMR of di-*tert*-butyl ((S)-6-((2-((S)-2-(2-([1,1'-biphenyl]-3-carboxamido)-5-bromobenzamido)-3-(1H-indol-3-yl)propanamido)ethyl)amino)-6-oxohexane-1,5-diyl)dicarbamate (18b)

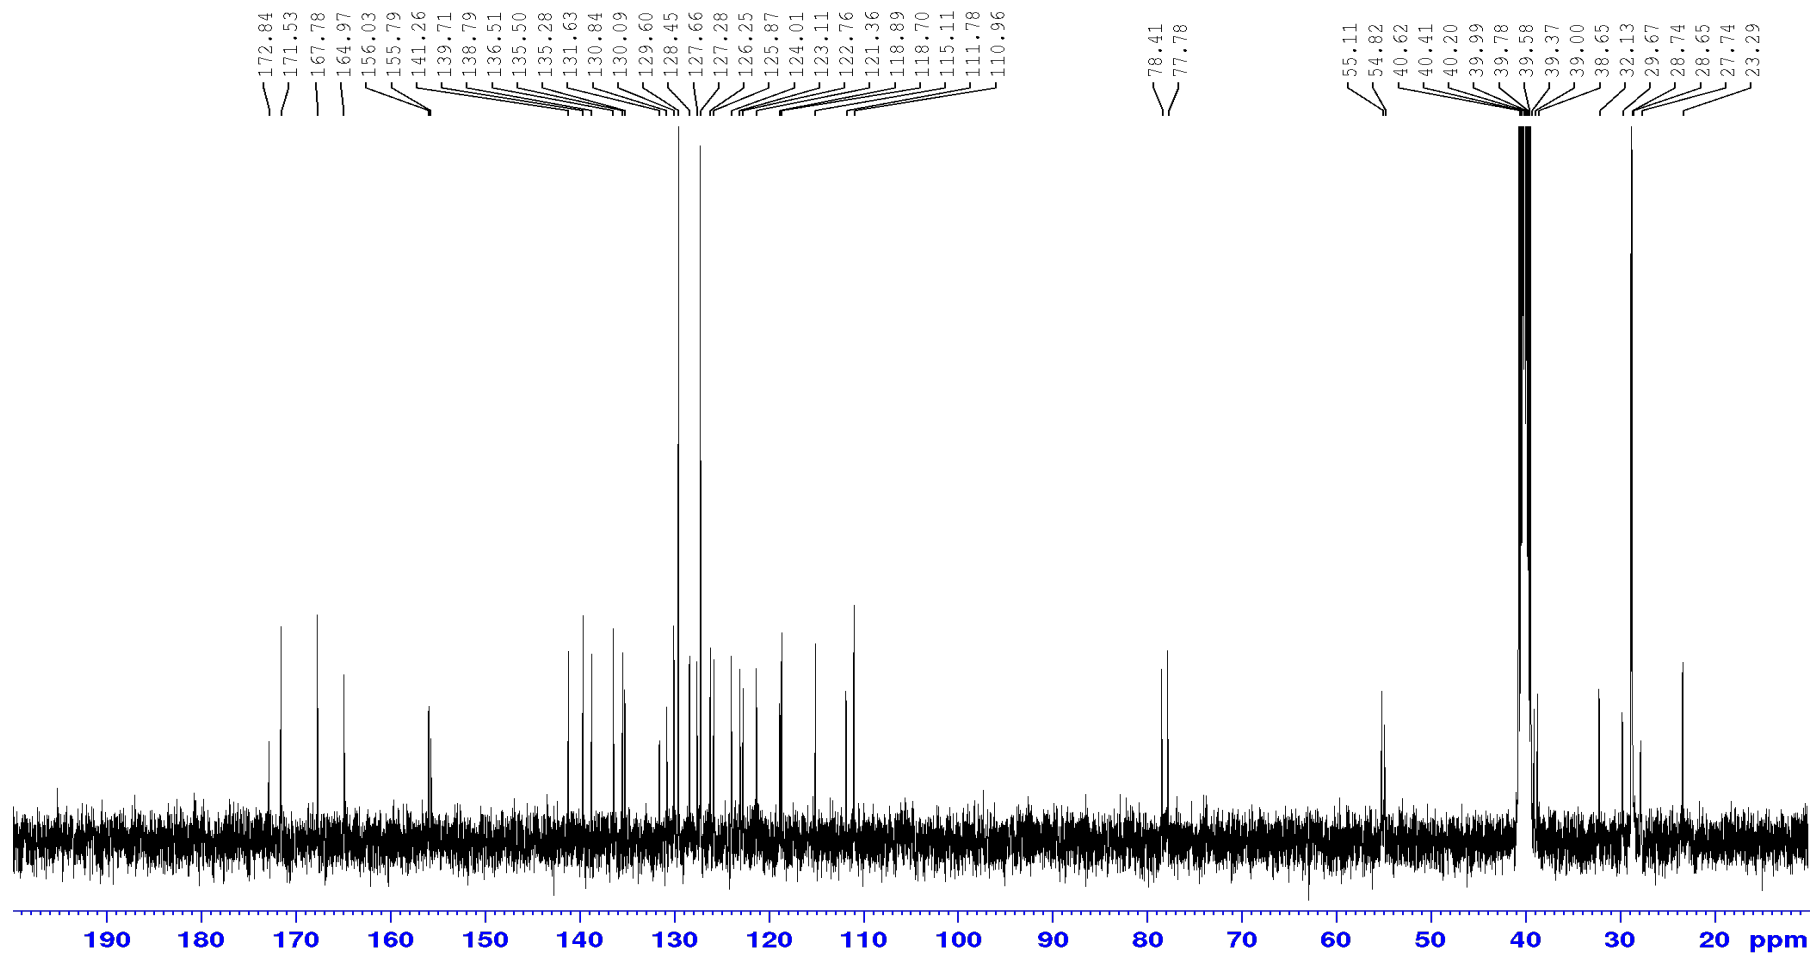



<sup>1</sup>H NMR of di-*tert*-butyl ((S)-6-((2-((S)-2-(2-([1,1'-biphenyl]-4-carboxamido)-5-bromobenzamido)-3-(1H-indol-3-yl)propanamido)ethyl)amino)-6-oxohexane-1,5-diyl)dicarbamate (18c)

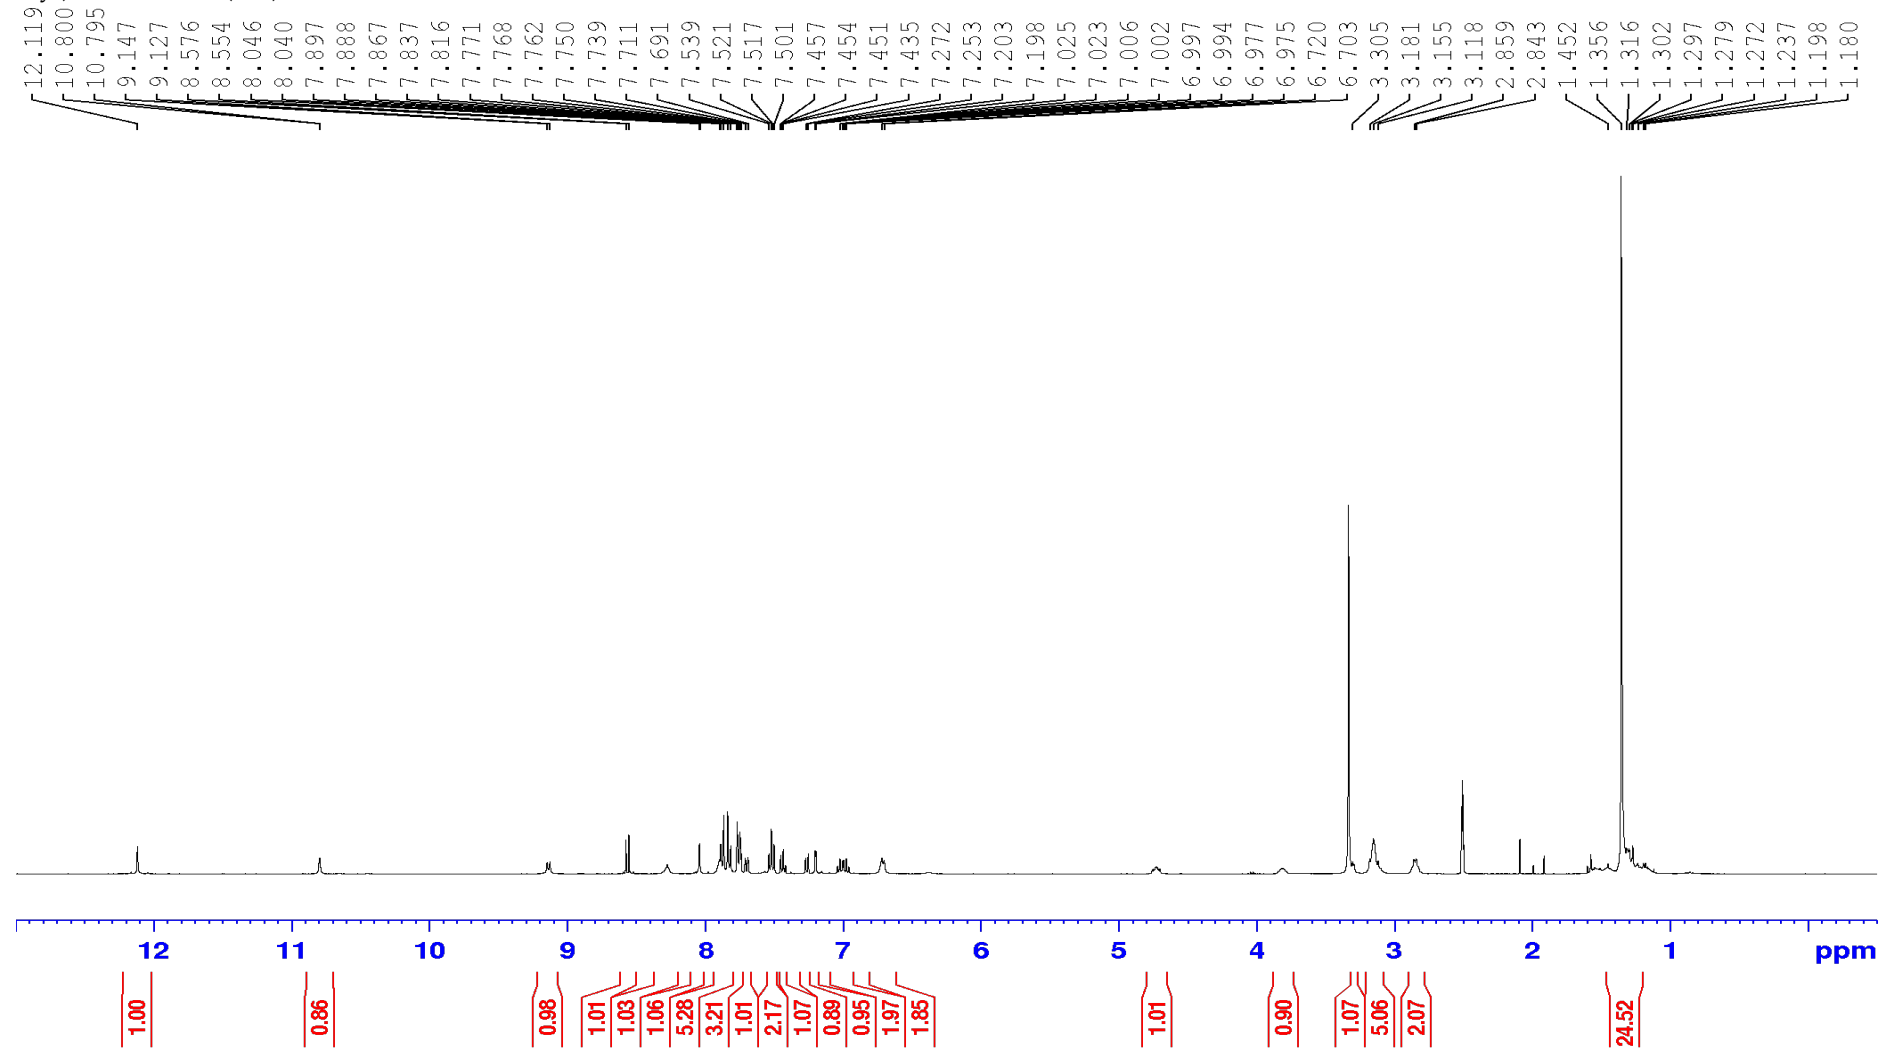

$^{13}\text{C}$  NMR of di-*tert*-butyl ((S)-6-((2-((S)-2-(2-([1,1'-biphenyl]-4-carboxamido)-5-bromobenzamido)-3-(1H-indol-3-yl)propanamido)ethyl)amino)-6-oxohexane-1,5-diyl)dicarbamate (18c)

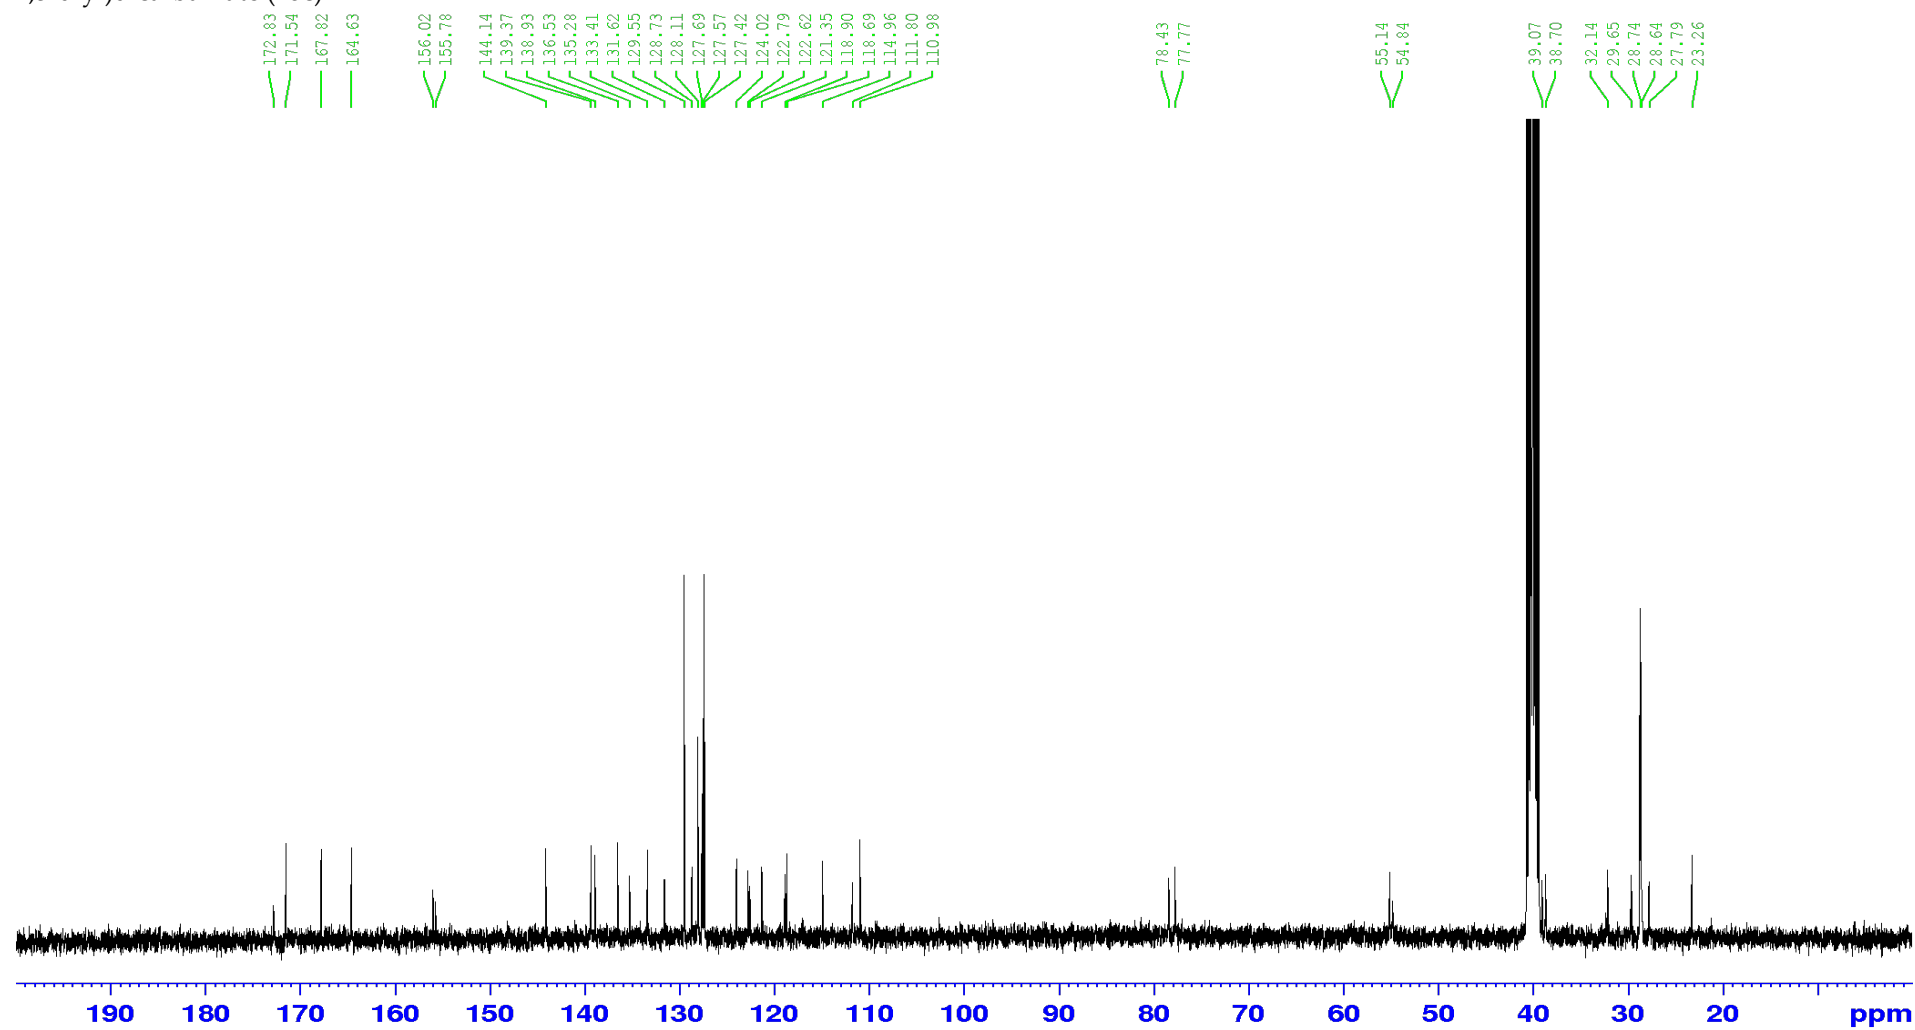

<sup>1</sup>H NMR of *N*-(4-bromo-2-(((*S*)-1-((2-((*S*)-2,6-diaminohexanamido)ethyl)amino)-3-(1*H*-indol-3-yl)-1-oxopropan-2-yl)carbamoyl)phenyl)-2-naphthamide (19a)

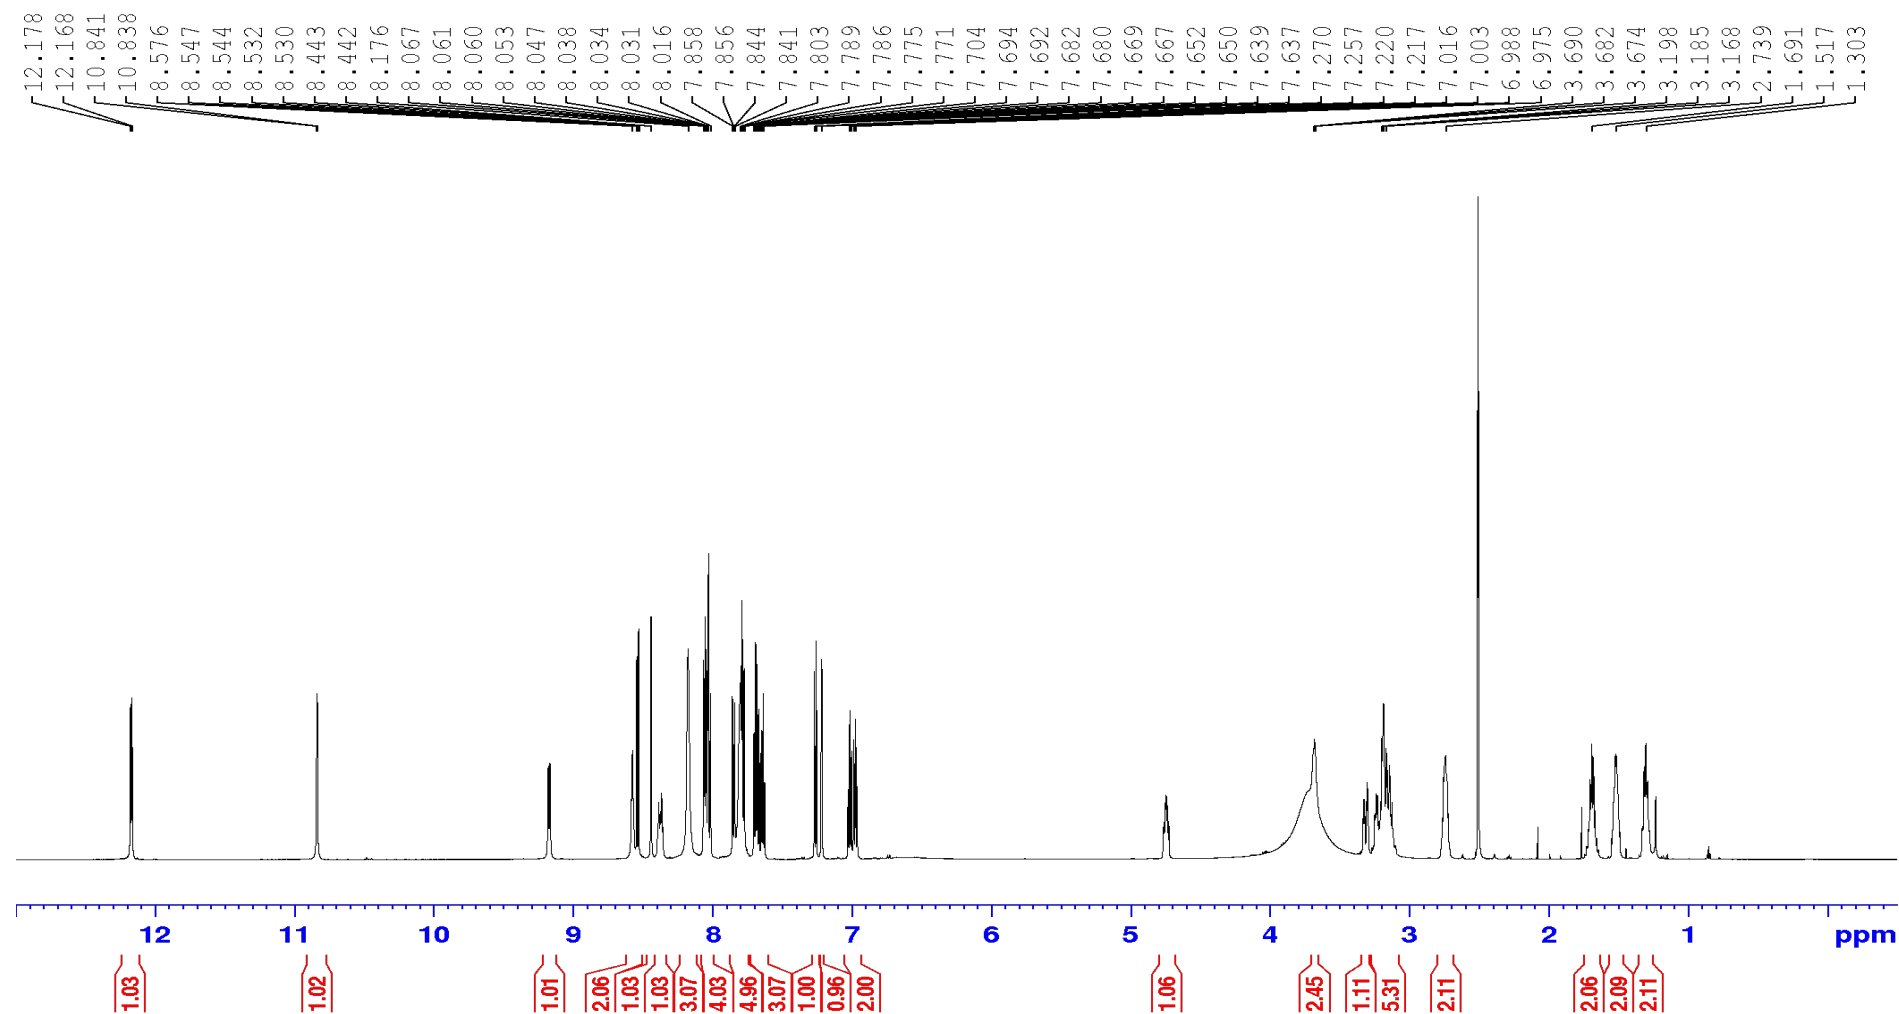

$^{13}\text{C}$  NMR of *N*-(4-bromo-2-(((*S*)-1-((2-((*S*)-2,6-diaminohexanamido)ethyl)amino)-3-(1*H*-indol-3-yl)-1-oxopropan-2-yl)carbamoyl)phenyl)-2-naphthamide (19a)

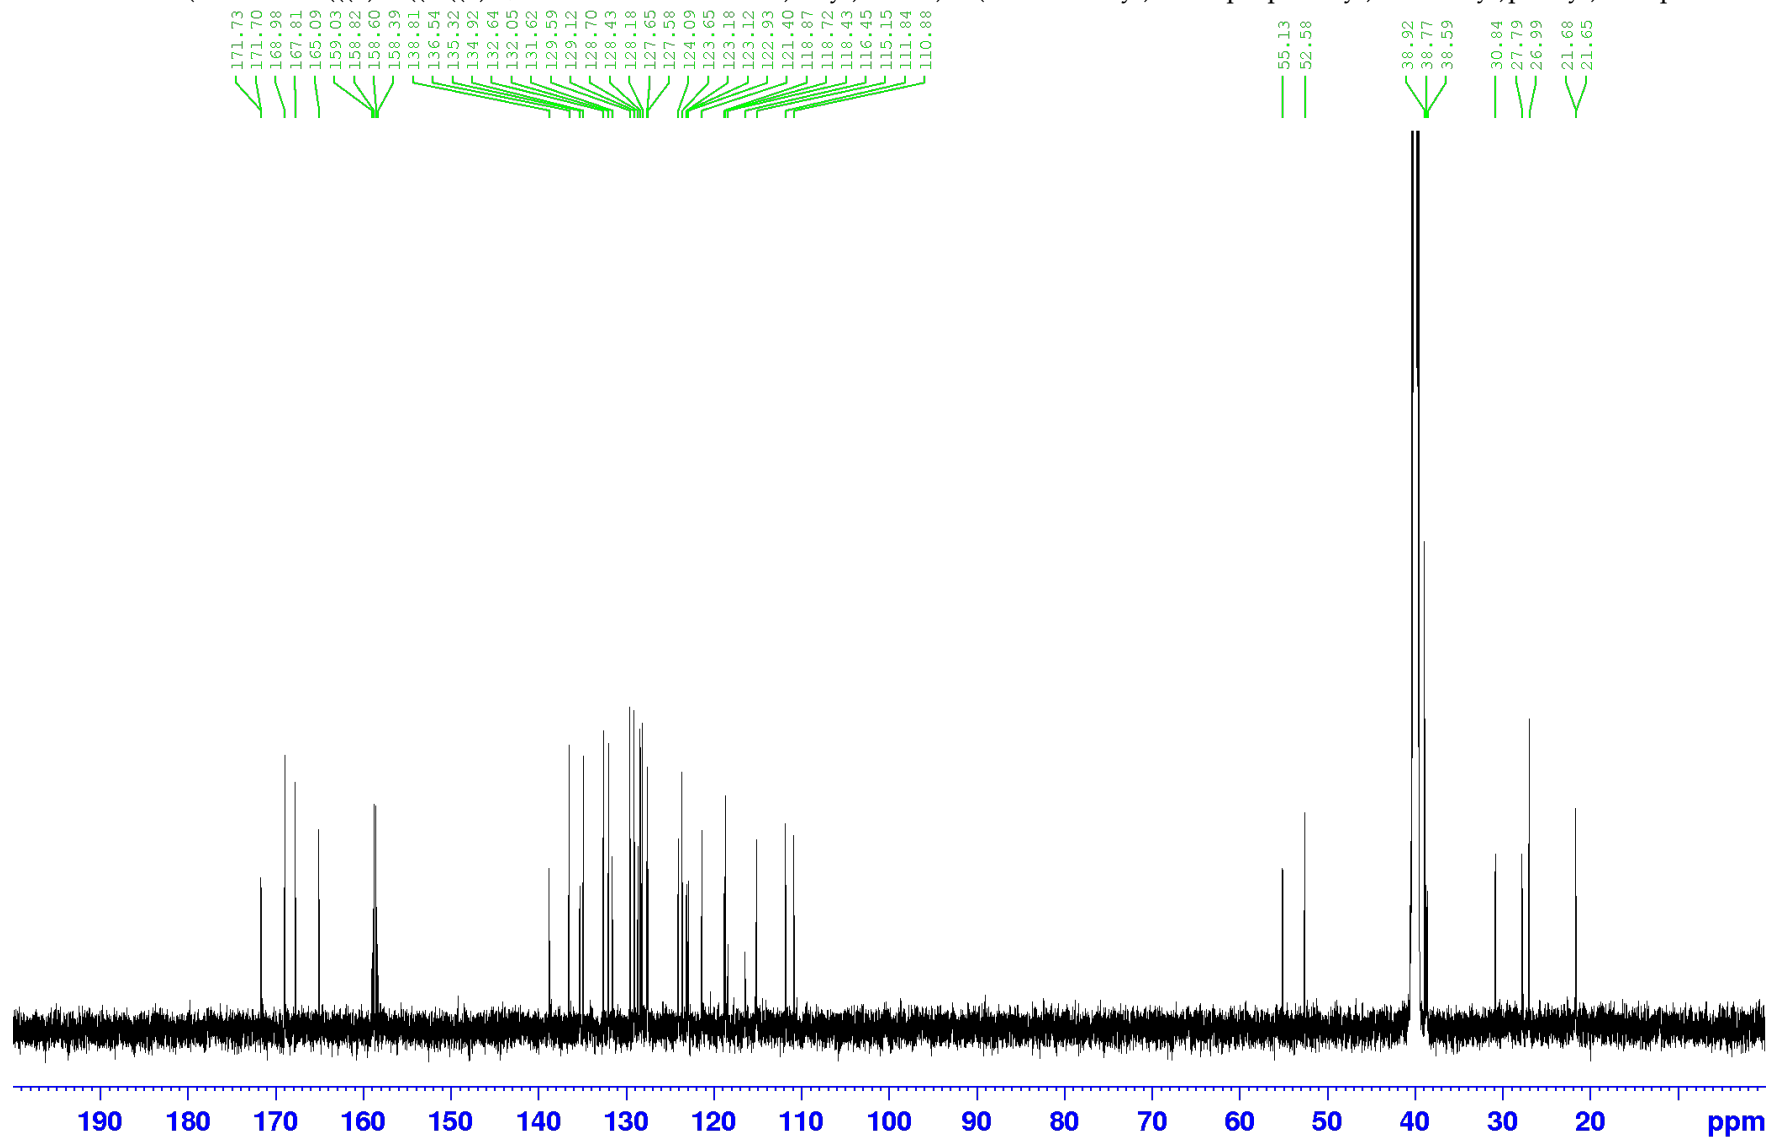

<sup>1</sup>HNMR of N-(4-bromo-2-(((S)-1-((2-((S)-2,6-diaminohexanamido)ethyl)amino)-3-(1*H*-indol-3-yl)-1-oxopropan-2-yl)carbamoyl)phenyl)-[1,1'-biphenyl]-3-carboxamide (19b)

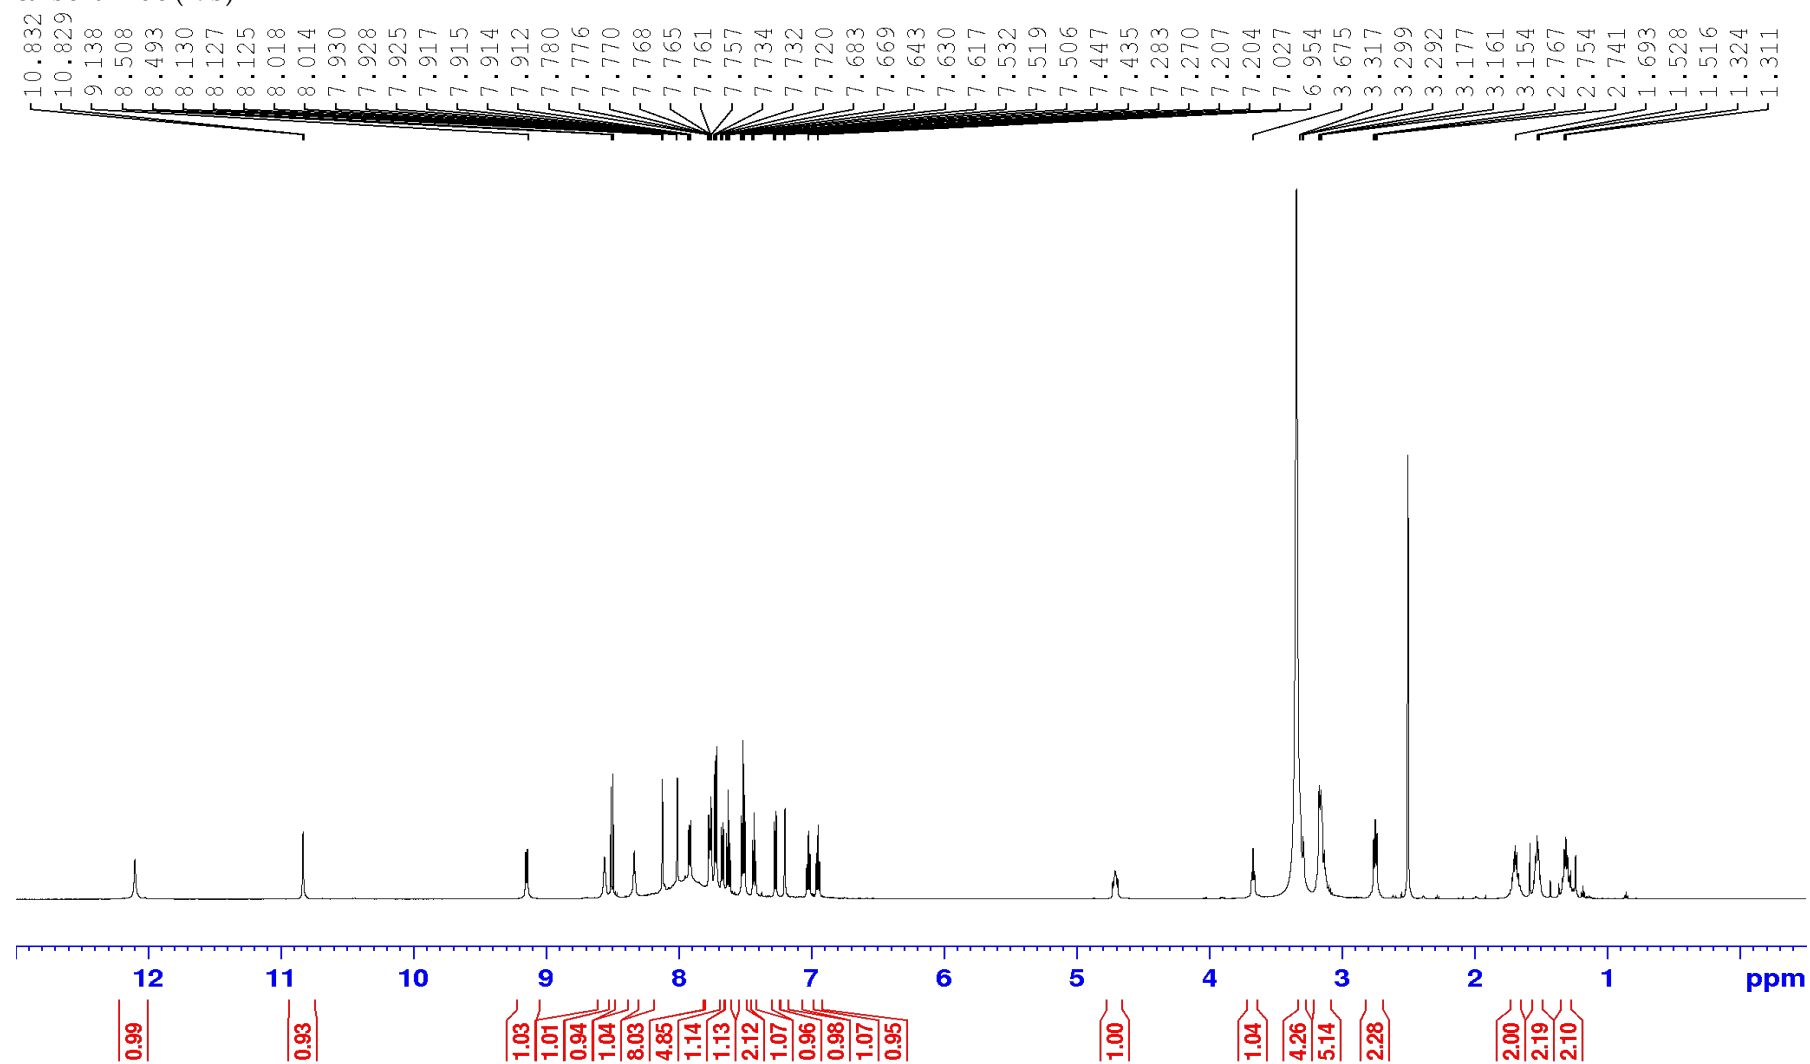

$^{13}\text{C}$  NMR of *N*-(4-bromo-2-(((*S*)-1-((2-((*S*)-2,6-diaminohexanamido)ethyl)amino)-3-(1*H*-indol-3-yl)-1-oxopropan-2-yl)carbamoyl)phenyl)-[1,1'-biphenyl]-3-carboxamide (19b)

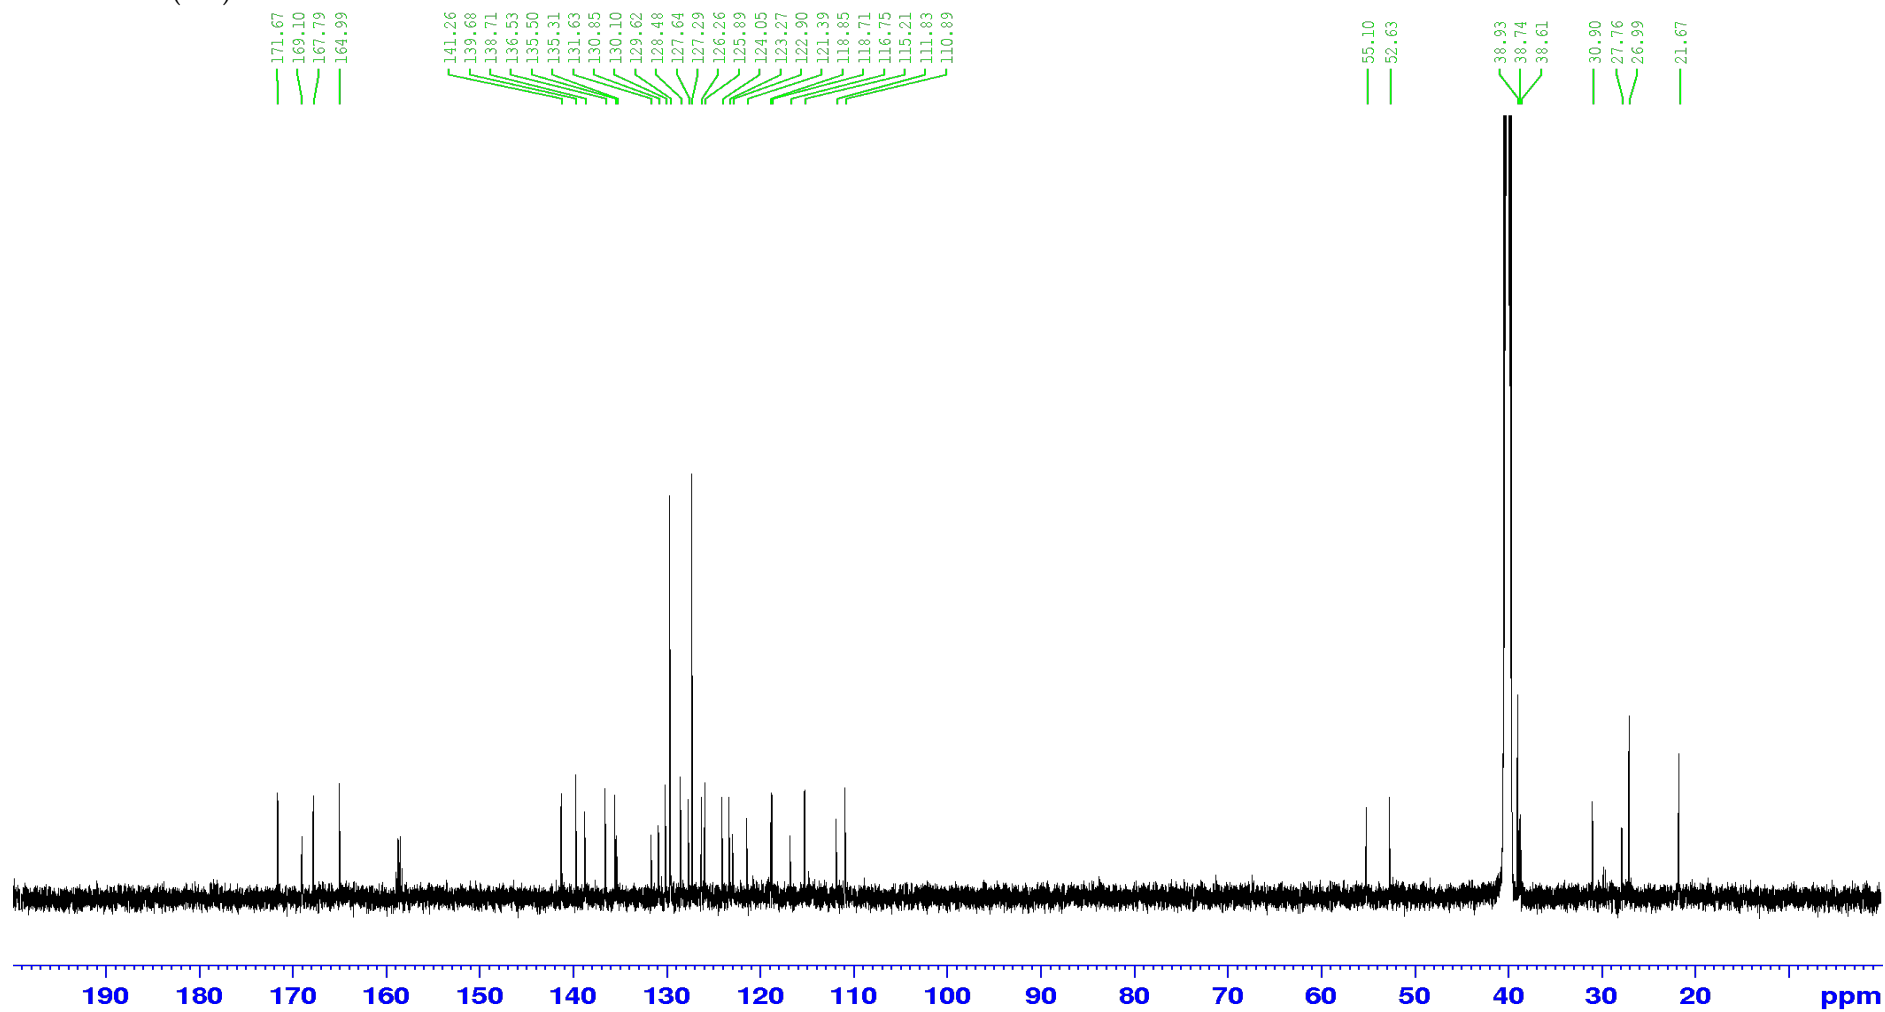

<sup>1</sup>H NMR of N-(4-bromo-2-(((S)-1-((2-((S)-2,6-diaminohexanamido)ethyl)amino)-3-(1*H*-indol-3-yl)-1-oxopropan-2-yl)carbamoyl)phenyl)-[1,1'-biphenyl]-4-carboxamide (19c)

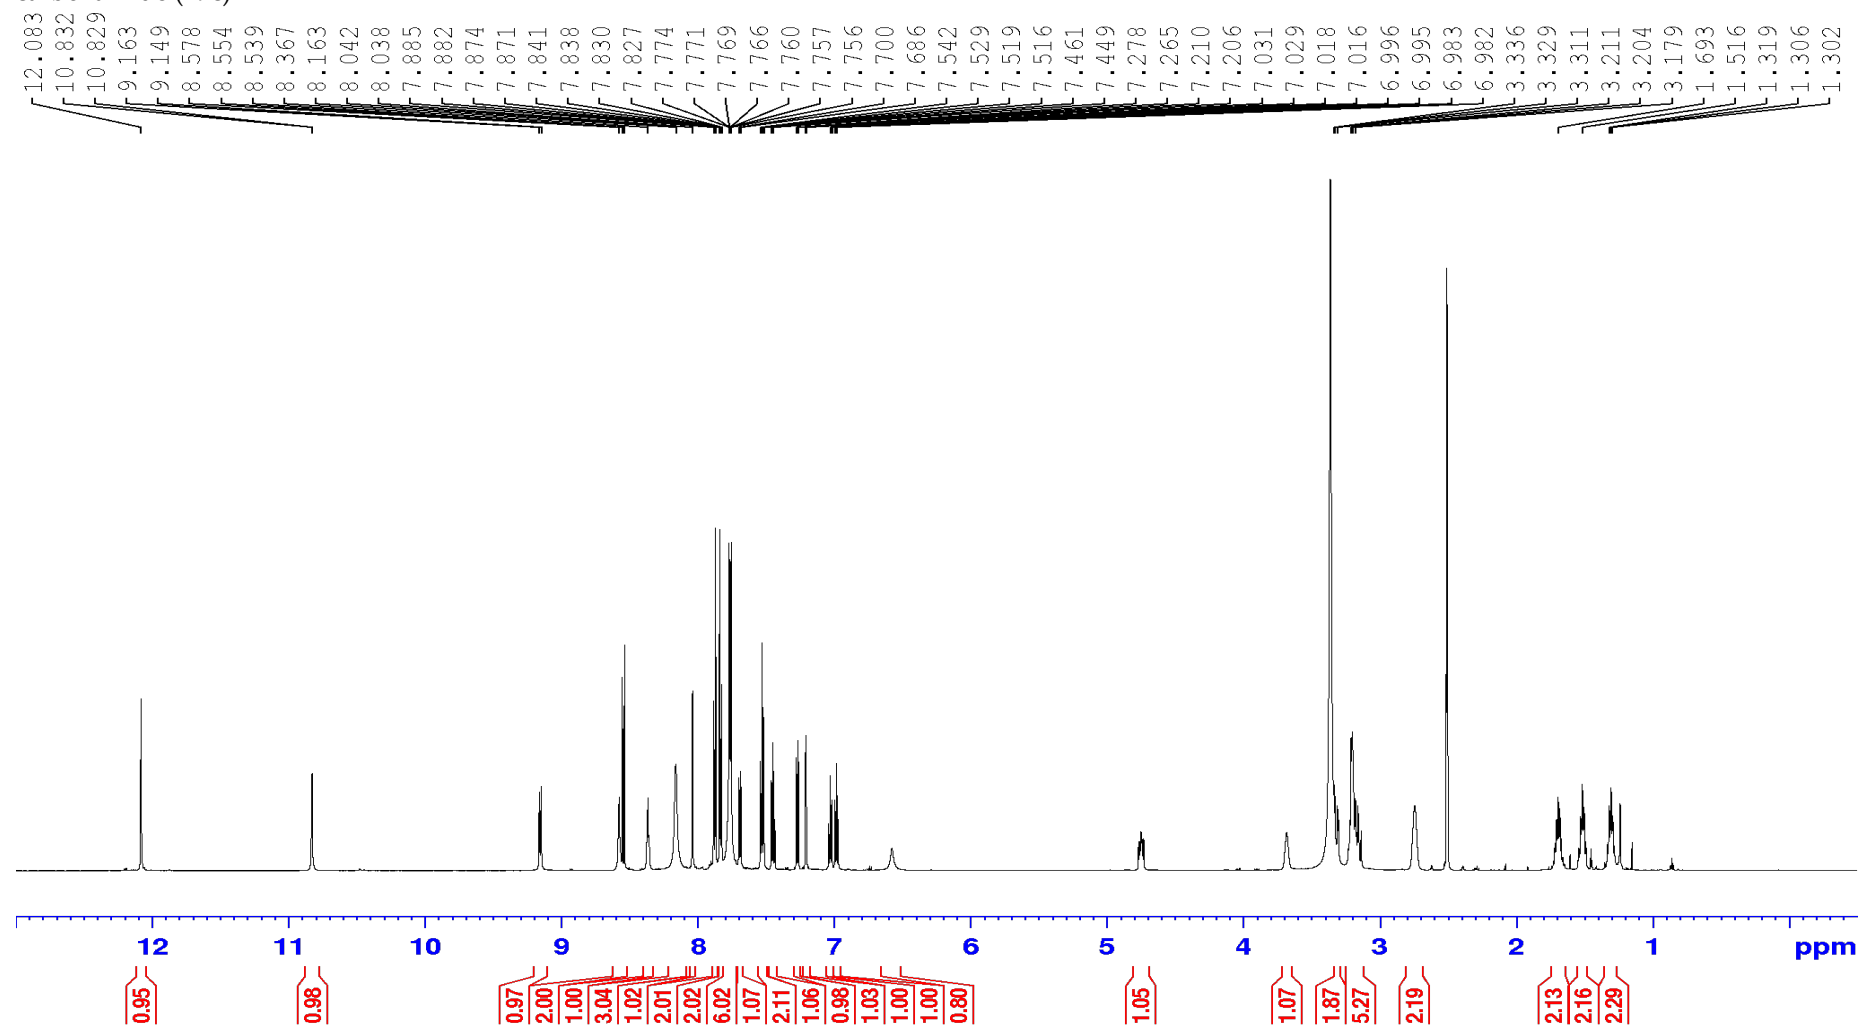

$^{13}\text{C}$  NMR of *N*-(4-bromo-2-(((*S*)-1-((2-((*S*)-2,6-diaminohexanamido)ethyl)amino)-3-(1*H*-indol-3-yl)-1-oxopropan-2-yl)carbamoyl)phenyl)-[1,1'-biphenyl]-4-carboxamide (19c)

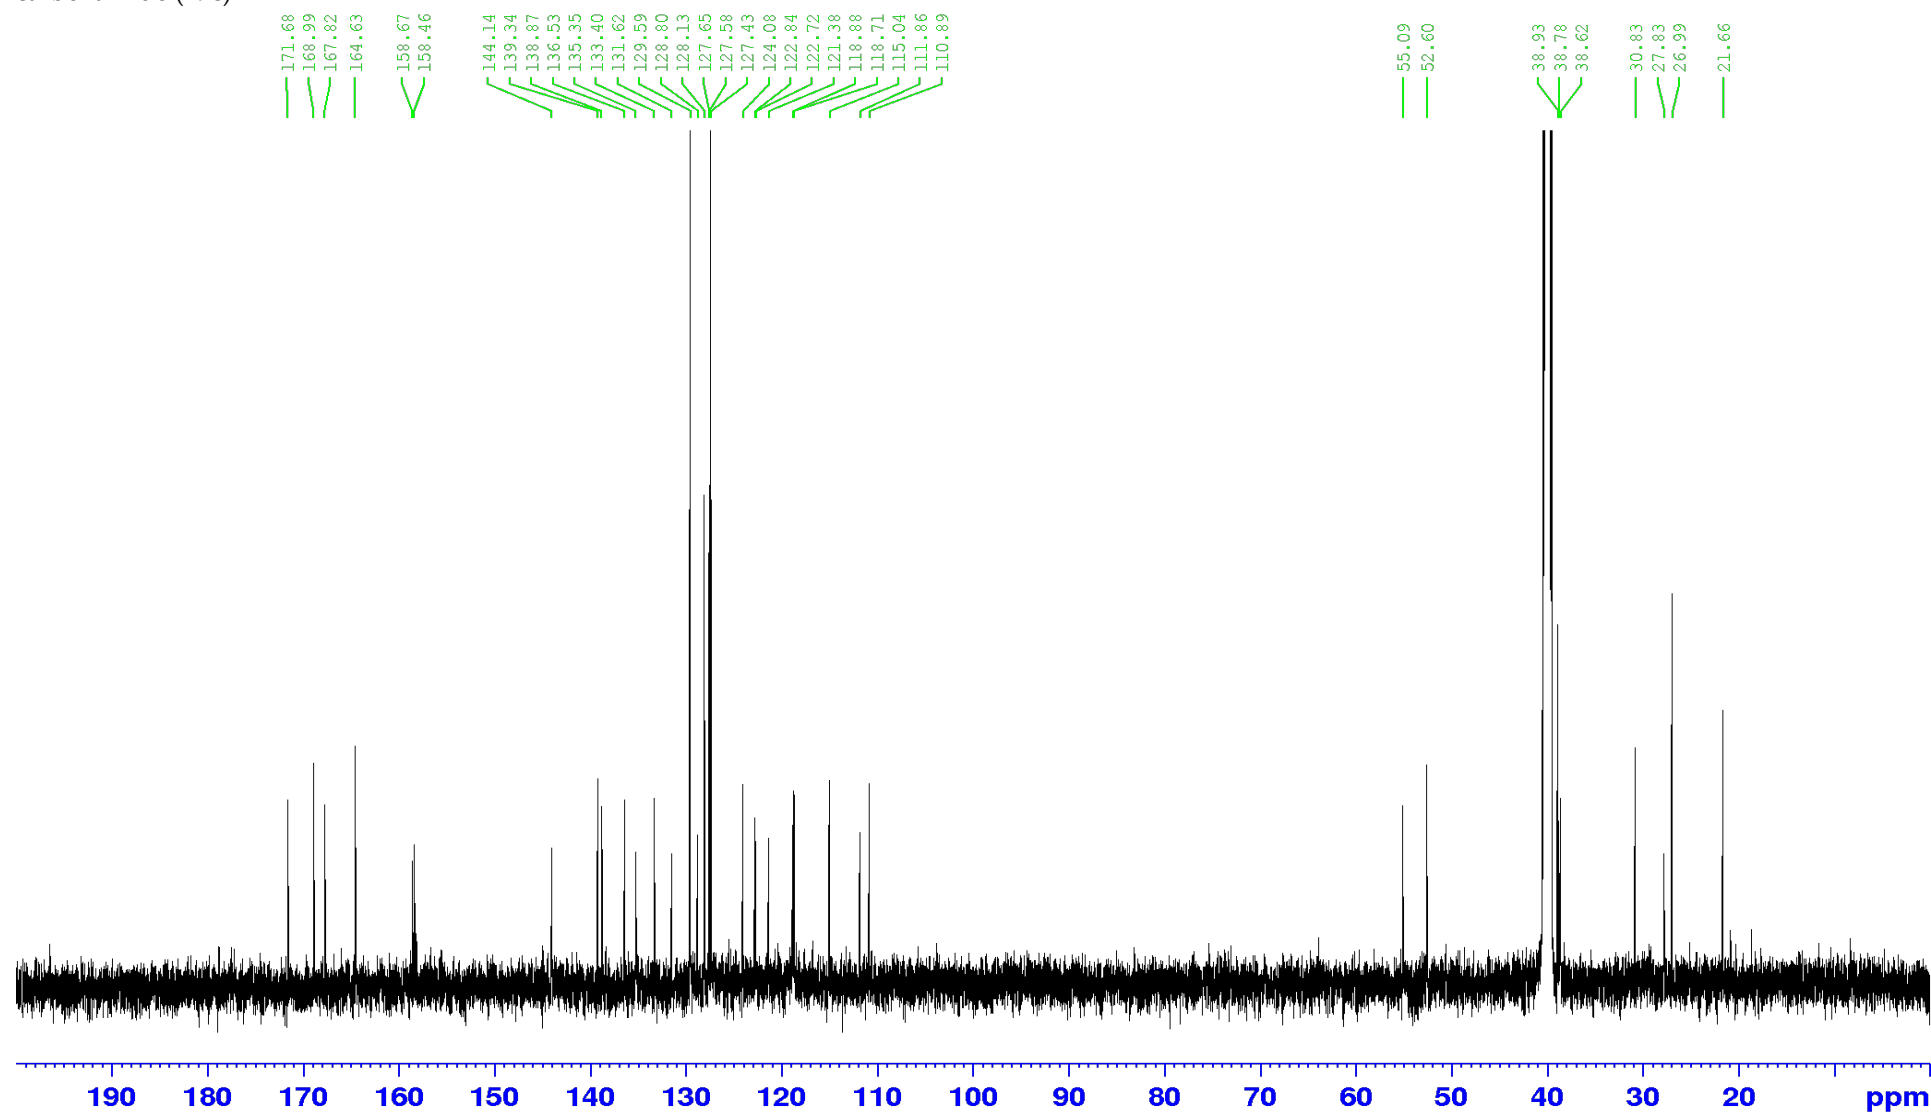

Supplement: s1 [file s1]
